# Supplementary material for: Large-scale screening of clinical assessments to distinguish between states in the Integrated HD Progression Model (IHDPM)
Source: Front Aging Neurosci. 2024 Feb 13;16:1320755. doi: 10.3389/fnagi.2024.1320755 (PMC10896990; doi:10.3389/fnagi.2024.1320755)
Supplement: SUPPLEMENTARY TABLE S1 — IHDPM state pairwise comparison results. Assessment items with large absolute effect sizes (≥ 0.8) are listed in rank order. Signature assessments – unique to a specific pair of states – are highlighted in yellow. Results limited to items with a minimum of 30 observations in each state within the specified pair. [file Table_1.XLSX]

## Sheet: cons_states_1_2
var	d	t_val	p_val	#samples_st1	#samples_st2	d_normalized	var_name	item	assessment
Motor.f0180	1.89947	-14.957	1.51523e-37	140	141	0.226607	miscore	Motor score; incomplete	UHDRS; Motor
SF.f0368	1.83597	-10.8636	3.52491e-20	42	96	0.219031	mh,mh_nbs,mhsubscore	Mental health score	SF-12
SF.f0364	1.77244	-10.6744	1.06854e-19	42	96	0.211452	gh,gh_nbs,ghsubscore	General health score	SF-12
SF.f0366	1.70029	-10.3534	6.98767e-19	42	96	0.202845	sf,sf_nbs,sfsubscore	Social functioning score	SF-12
Motor.f0212	1.60181	-22.5499	1.00451e-87	480	330	0.191095	diagconf	Diagnostic confidence level	UHDRS; Motor
SF.f0363	1.5349	-10.8217	4.50711e-20	42	96	0.183114	bp,bp_nbs,bpsubscore	Bodily pain score	SF-12
Motor.f0179	1.52642	-21.2172	3.49034e-79	471	309	0.182102	motorscore,motscore	Motor score	UHDRS; Motor
SF.f0367	1.44881	-8.33821	7.40474e-14	42	96	0.172843	re,re_nbs,resubscore	Role-emotional score	SF-12
SF.f0365	1.44766	-9.06854	1.31214e-15	42	94	0.172706	vt,vt_nbs,vtsubscore	Vitality score	SF-12
SF.f0362	1.42091	-8.77489	6.61511e-15	42	95	0.169515	rp,rp_nbs,rpsubscore	Role-physical score	SF-12
GCI.f0863	1.36257	-8.10549	1.99948e-13	97	50	0.162554	svrtyll	Based on review of information, I feel the severity of illness is	GCI
SF.f0361	1.2748	-7.63193	3.98542e-12	42	93	0.152083	pf,pf_nbs,pfsubscore	Physical functioning score	SF-12
chorea.score	1.24895	-17.4938	4.53835e-58	475	308	0.149		Mean chorea item value	UHDRS; Motor
Motor.f2450	1.17401	-12.9203	7.44385e-33	302	166	0.140059	chorea	Total chorea score	UHDRS; Motor
Motor.f2447	1.08674	-11.8394	1.86872e-28	302	166	0.129648	brady_tot	Total bradykinesia score	UHDRS; Motor
Summary.f0780	1.06802	-6.79954	1.83255e-10	115	52	0.127415	dxentire	Do you believe that this participant has manifest HD?	Summary form; Registry
Motor.f0206	1.00366	-13.9704	9.39923e-40	475	308	0.119736	chorealue,chorlue	Maximal chorea: LUE	UHDRS; Motor
Summary.f0778	0.977237	5.95545	1.48938e-08	115	54	0.116584	impwrsex	Since your last assessment, in your opinion, has the participant…	Summary form; Registry
CSRI.f0458	0.974579	-3.88701	0.000203505	33	52	0.116267	csri1	Neurology outpatient visit	CSRI
Motor.f0205	0.932958	-12.9941	4.27021e-35	475	309	0.111302	chorearue,chorrue	Maximal chorea: RUE	UHDRS; Motor
Cognitive.f0255	0.873177	10.8107	3.90179e-25	335	307	0.10417	verflt	Verbal fluency test (letters) completed	UHDRS; Cognitive
Motor.f0207	0.853741	-11.8932	4.23561e-30	475	309	0.101851	chorearle,chorrle	Maximal chorea: RLE	UHDRS; Motor
Motor.f0208	0.827983	-11.5185	1.81788e-28	475	309	0.0987784	chorealle,chorlle	Maximal chorea: LLE	UHDRS; Motor
WHODAS.f2385	0.823458	-3.14457	0.00216341	35	72	0.0982385	whodasp5_2	Doing your most important household tasks well?	WHO Disability Assessment Scale

## Sheet: cons_states_2_3
var	d	t_val	p_val	#samples_st2	#samples_st3	d_normalized	var_name	item	assessment
Motor.f0180	1.31435	-13.1245	3.9257e-33	226	189	0.180986	miscore	Motor score; incomplete	UHDRS; Motor
Motor.f0179	1.23875	-18.2969	7.7818e-64	541	362	0.170576	motorscore,motscore	Motor score	UHDRS; Motor
Motor.f0212	1.18641	-17.7346	8.61121e-61	549	377	0.163368	diagconf	Diagnostic confidence level	UHDRS; Motor
GCI.f0863	1.08626	-7.68572	4.55264e-13	153	76	0.149577	svrtyll	Based on review of information, I feel the severity of illness is	GCI
Summary.f0780	1.07122	-7.87025	9.4648e-14	182	81	0.147507	dxentire	Do you believe that this participant has manifest HD?	Summary form; Registry
chorea.score	1.04857	-15.5266	2.29729e-48	542	363	0.144388		Mean chorea item value	UHDRS; Motor
Motor.f0204	0.923151	-13.681	7.3947e-39	542	363	0.127118	choreatrunk,chortrnk	Maximal chorea: trunk	UHDRS; Motor
Motor.f2450	0.904572	-9.19636	1.66093e-18	269	159	0.12456	chorea	Total chorea score	UHDRS; Motor
Cognitive.f0241	0.901073	12.777	2.97121e-34	490	341	0.124078	stroop_correct,swr_correct,swrt1	Stroop word reading; total correct	UHDRS; Cognitive
Summary.f0778	0.851337	6.2237	1.9252e-09	183	80	0.117229	impwrsex	Since your last assessment, in your opinion, has the participant…	Summary form; Registry
Cognitive.f0237	0.848301	11.8253	7.3245e-30	479	327	0.116811	scnt1	Stroop color naming; total correct	UHDRS; Cognitive
Motor.f0206	0.840409	-12.4316	7.26419e-33	542	363	0.115724	chorealue,chorlue	Maximal chorea: LUE	UHDRS; Motor
Functional.f2453	0.824847	-8.43669	5.25618e-16	266	158	0.113581	uhdrs80	Q80 diagnostic criteria	UHDRS
Functional.f0221	0.820913	8.30488	1.2915e-15	232	203	0.11304	indepencescale,indepscl	Subject's independence in %	UHDRS; Func/Indep

## Sheet: cons_states_3_4
var	d	t_val	p_val	#samples_st3	#samples_st4	d_normalized	var_name	item	assessment
Motor.f0179	1.70882	-17.4049	2.01371e-51	238	182	0.668318	motorscore,motscore	Motor score	UHDRS; Motor
Motor.f0180	1.68723	-13.1398	2.92704e-30	125	124	0.659877	miscore	Motor score; incomplete	UHDRS; Motor
Motor.f2450	1.53098	-9.23165	2.71691e-16	94	55	0.598765	chorea	Total chorea score	UHDRS; Motor
Motor.f2447	1.38394	-8.32173	5.46015e-14	94	55	0.54126	brady_tot	Total bradykinesia score	UHDRS; Motor
GCI.f0863	1.2524	-5.74799	7.31617e-08	86	33	0.489813	svrtyll	Based on review of information, I feel the severity of illness is	GCI
chorea.score	1.23882	-12.6281	3.34021e-31	239	182	0.484502		Mean chorea item value	UHDRS; Motor
Functional.f2453	1.20944	-7.30735	1.68136e-11	93	54	0.473013	uhdrs80	Q80 diagnostic criteria	UHDRS
Motor.f0206	1.12208	-11.4262	1.66054e-26	239	182	0.438844	chorealue,chorlue	Maximal chorea: LUE	UHDRS; Motor
Motor.f0212	1.12149	-11.405	1.901e-26	239	185	0.438614	diagconf	Diagnostic confidence level	UHDRS; Motor
Motor.f0205	1.10259	-11.2357	8.77942e-26	239	182	0.431224	chorearue,chorrue	Maximal chorea: RUE	UHDRS; Motor
Cognitive.f0237	1.0745	10.0812	3.47775e-21	192	165	0.420236	scnt1	Stroop color naming; total correct	UHDRS; Cognitive
Motor.f2446	1.0393	-6.28762	3.47766e-09	94	55	0.406471	oculo	Total oculo score	UHDRS; Motor
Motor.f0202	0.97057	-9.8896	7.24053e-21	239	182	0.37959	choreaface,chorface	Maximal chorea: face	UHDRS; Motor
oculo.score	0.936382	-9.54973	1.10288e-19	239	182	0.366219		Mean oculo item value	UHDRS; Motor
Cognitive.f0241	0.920358	8.86116	3.28626e-17	203	172	0.359952	stroop_correct,swr_correct,swrt1	Stroop word reading; total correct	UHDRS; Cognitive
Cognitive.f0229	0.871146	8.68493	9.69977e-17	227	176	0.340705	sdmt_correct,sdmt1	Symbol digit modality; total correct	UHDRS; Cognitive
Motor.f0204	0.866409	-8.84495	2.57802e-17	239	182	0.338853	choreatrunk,chortrnk	Maximal chorea: trunk	UHDRS; Motor
SF.f0365	0.852282	-4.91354	2.91144e-06	35	85	0.333327	vt,vt_nbs,vtsubscore	Vitality score	SF-12
Motor.f0207	0.844917	-8.59087	1.72173e-16	239	182	0.330447	chorearle,chorrle	Maximal chorea: RLE	UHDRS; Motor
Motor.f0208	0.826527	-8.40316	6.8352e-16	239	182	0.323255	chorealle,chorlle	Maximal chorea: LLE	UHDRS; Motor
SF.f0818	0.822359	3.67969	0.000444001	36	39	0.321624	general,general_sf36,gh01	In general, how would you say your health is?	SF-36
SF.f0366	0.822204	-4.9046	3.05059e-06	35	84	0.321564	sf,sf_nbs,sfsubscore	Social functioning score	SF-12
SF.f0368	0.804045	-4.52732	1.44613e-05	34	85	0.314462	mh,mh_nbs,mhsubscore	Mental health score	SF-12
finger.score	0.804007	-8.18063	3.41077e-15	239	182	0.314447		Mean finger score item value	UHDRS; Motor

## Sheet: cons_states_4_5
var	d	t_val	p_val	#samples_st4	#samples_st5	d_normalized	var_name	item	assessment
Functional.f0213	2.32658	35.1193	3.17841e-171	496	412	0.814072	functionalscore,tfcscore	Functional score	UHDRS; TFC
Functional.f0221	1.98748	27.2551	1.65456e-114	404	355	0.695419	indepencescale,indepscl	Subject's independence in %	UHDRS; Func/Indep
Functional.f0214	1.93901	29.1641	2.13041e-132	496	412	0.678459	fcoccupation,occupatn	Occupation	UHDRS; TFC
Functional.f0220	1.72158	23.4246	1.59738e-91	398	355	0.60238	fiscore	Functional assessment score; incomplete	UHDRS; Func/Indep
Functional.f0219	1.72081	23.3322	9.26947e-91	396	349	0.602113	fascore,functionscore	Functional assessment score	UHDRS; Func/Indep
Functional.f0215	1.26132	19.4537	3.91064e-71	516	429	0.441335	fcfinances,finances,finances_tfc	Finances	UHDRS; TFC
Functional.f0216	1.19096	17.8654	3.4116e-61	489	398	0.416717	chores,fcdomestic	Domestic chores	UHDRS; TFC
Functional.f1246	1.0108	5.13669	1.36567e-06	63	40	0.353679	employmentaccu,emplusl,uhdrs43	Gainful employment; accustomed work	UHDRS; Func/Indep
GCI.f0863	0.97138	-9.46982	2.48051e-19	246	156	0.339886	svrtyll	Based on review of information, I feel the severity of illness is	GCI
CSRI.f0767	0.907218	-5.15555	9.34635e-07	70	60	0.317436	csri54	Employment status	CSRI
WPAI.f0595	0.883689	4.28324	4.82435e-05	36	51	0.309203	wpai01	Are you currently employed (working for pay)?	WPAI-SHP
WPAI.f0594	0.833247	-3.62984	0.000486311	36	50	0.291553	wpaiscr4	Activity impairment due to HD	WPAI-SHP
WPAI.f0600	0.833247	-3.62984	0.000486311	36	50	0.291553	wpai06	Impact of HD on regular activities (other than working)	WPAI-SHP

## Sheet: cons_states_5_6
var	d	t_val	p_val	#samples_st5	#samples_st6	d_normalized	var_name	item	assessment
Motor.f0180	1.65204	-35.3974	1.23807e-211	1159	760	0.382614	miscore	Motor score; incomplete	UHDRS; Motor
Motor.f0179	1.61934	-35.9279	1.38027e-219	1225	823	0.37504	motorscore,motscore	Motor score	UHDRS; Motor
Motor.f2447	1.28776	-6.64747	1.29386e-09	53	56	0.298245	brady_tot	Total bradykinesia score	UHDRS; Motor
Cognitive.f0654	1.02887	8.36797	5.75564e-16	424	84	0.238286	cogscore	Cognitive score	Combined cognitive assessment (Registry 2)
oculo.score	1.00207	-22.3352	3.67727e-99	1238	830	0.232079		Mean oculo item value	UHDRS; Motor
Cognitive.f0229	0.9635	18.5677	2.41785e-69	825	656	0.223147	sdmt_correct,sdmt1	Symbol digit modality; total correct	UHDRS; Cognitive
Cognitive.f0241	0.946163	18.0228	1.20503e-65	799	644	0.219131	stroop_correct,swr_correct,swrt1	Stroop word reading; total correct	UHDRS; Cognitive
Cognitive.f0237	0.919872	17.4712	4.31204e-62	793	636	0.213042	scnt1	Stroop color naming; total correct	UHDRS; Cognitive
Motor.f0192	0.899455	-20.0538	7.01729e-82	1237	831	0.208314	prosuphandsleft,prosupl	Pronate/supinate-hands; left	UHDRS; Motor
Motor.f2450	0.898957	-4.61505	1.0969e-05	53	56	0.208198	chorea	Total chorea score	UHDRS; Motor
Motor.f0209	0.881292	-19.6501	5.9302e-79	1238	831	0.204107	gait	Gait	UHDRS; Motor
GCI.f0863	0.857714	-13.5595	6.76767e-39	734	389	0.198647	svrtyll	Based on review of information, I feel the severity of illness is	GCI
Motor.f2449	0.847269	-4.17371	6.12114e-05	53	56	0.196228	dystonia	Total dystonia score	UHDRS; Motor
Motor.f0186	0.826631	-18.4298	2.40398e-70	1238	831	0.191448	sacvelocityver,sacvelv	Saccade velocity; vertical	UHDRS; Motor
Functional.f0219	0.820929	16.738	2.24132e-58	1001	720	0.190127	fascore,functionscore	Functional assessment score	UHDRS; Func/Indep
Motor.f0187	0.810219	-18.0608	8.11298e-68	1237	831	0.187647	dysarth,dysarthria	Saccade velocity; dysarthria	UHDRS; Motor
Motor.f0184	0.809462	-18.0429	1.07275e-67	1238	830	0.187471	sacinitiationver,sacinitv	Saccade initiation; vertical	UHDRS; Motor
Functional.f0220	0.807543	16.6903	3.49761e-58	1024	743	0.187027	fiscore	Functional assessment score; incomplete	UHDRS; Func/Indep
finger.score	0.80138	-17.8666	1.67348e-66	1237	831	0.1856		Mean finger score item value	UHDRS; Motor

## Sheet: cons_states_6_7
var	d	t_val	p_val	#samples_st6	#samples_st7	d_normalized	var_name	item	assessment
Motor.f0179	1.44763	-54.9137	0	3482	2458	0.413443	motorscore,motscore	Motor score	UHDRS; Motor
Motor.f0180	1.44257	-54.534	0	3456	2443	0.411998	miscore	Motor score; incomplete	UHDRS; Motor
Functional.f0220	1.26981	46.7343	0	3189	2356	0.362658	fiscore	Functional assessment score; incomplete	UHDRS; Func/Indep
Functional.f0219	1.26358	45.7708	0	3092	2280	0.360879	fascore,functionscore	Functional assessment score	UHDRS; Func/Indep
Functional.f0213	1.25223	47.2995	0	3414	2436	0.357637	functionalscore,tfcscore	Functional score	UHDRS; TFC
Functional.f0221	1.23528	45.6596	0	3194	2360	0.352796	indepencescale,indepscl	Subject's independence in %	UHDRS; Func/Indep
Functional.f1252	1.18065	4.52754	2.76736e-05	34	30	0.337193	children,children_function,supchild,uhdrs49	Supervise children without help	UHDRS; Func/Indep
Cognitive.f0654	1.10673	17.0867	8.99843e-60	1141	309	0.316082	cogscore	Cognitive score	Combined cognitive assessment (Registry 2)
Motor.f2447	1.04328	-4.30745	5.52371e-05	37	32	0.297961	brady_tot	Total bradykinesia score	UHDRS; Motor
GCI.f0863	1.03942	-28.7712	3.62722e-163	2228	1185	0.29686	svrtyll	Based on review of information, I feel the severity of illness is	GCI
Functional.f0216	0.950944	35.8539	1.26724e-254	3415	2425	0.27159	chores,fcdomestic	Domestic chores	UHDRS; TFC
Cognitive.f0229	0.934792	31.848	1.69619e-201	2572	2074	0.266976	sdmt_correct,sdmt1	Symbol digit modality; total correct	UHDRS; Cognitive
Motor.f0209	0.933114	-35.6452	1.21537e-252	3523	2493	0.266497	gait	Gait	UHDRS; Motor
Functional.f0215	0.899938	34.1391	2.36344e-233	3464	2462	0.257022	fcfinances,finances,finances_tfc	Finances	UHDRS; TFC
Cognitive.f0241	0.897526	30.4947	2.80901e-186	2534	2096	0.256333	stroop_correct,swr_correct,swrt1	Stroop word reading; total correct	UHDRS; Cognitive
Cognitive.f0237	0.88884	30.1933	6.33674e-183	2525	2094	0.253853	scnt1	Stroop color naming; total correct	UHDRS; Cognitive
Functional.f0214	0.86906	32.8697	1.36336e-217	3415	2436	0.248203	fcoccupation,occupatn	Occupation	UHDRS; TFC
oculo.score	0.861212	-32.9071	1.51515e-218	3533	2492	0.245962		Mean oculo item value	UHDRS; Motor
PBAHD.f0736	0.819754	-5.20383	5.91177e-07	101	61	0.234122	pbal16fr	Self care; frequency	PBA
Motor.f0191	0.809186	-30.9244	5.13639e-195	3528	2495	0.231104	prosuphandsright,prosupr	Pronate/supinate-hands; right	UHDRS; Motor

## Sheet: cons_states_7_8
var	d	t_val	p_val	#samples_st7	#samples_st8	d_normalized	var_name	item	assessment
Functional.f0213	1.59623	54.19	0	2664	2018	0.538249	functionalscore,tfcscore	Functional score	UHDRS; TFC
Functional.f0219	1.41898	46.5785	0	2448	1916	0.47848	fascore,functionscore	Functional assessment score	UHDRS; Func/Indep
Functional.f0220	1.40915	47.0804	0	2551	1977	0.475164	fiscore	Functional assessment score; incomplete	UHDRS; Func/Indep
Functional.f0221	1.39841	46.8951	0	2575	1984	0.471543	indepencescale,indepscl	Subject's independence in %	UHDRS; Func/Indep
Functional.f0216	1.16582	39.4635	2.85589e-294	2665	2015	0.393116	chores,fcdomestic	Domestic chores	UHDRS; TFC
Functional.f0217	1.12938	38.2766	4.0097e-279	2665	2016	0.380827	adl,fcadl	ADL	UHDRS; TFC
Motor.f0179	1.03752	-35.1301	3.43718e-240	2685	2001	0.349852	motorscore,motscore	Motor score	UHDRS; Motor
Motor.f0180	1.03575	-35.2431	8.22724e-242	2711	2021	0.349253	miscore	Motor score; incomplete	UHDRS; Motor
Functional.f0215	1.03183	35.1629	8.87325e-241	2690	2031	0.347933	fcfinances,finances,finances_tfc	Finances	UHDRS; TFC
GCI.f0863	0.977493	-25.3674	2.44985e-128	1818	1072	0.329611	svrtyll	Based on review of information, I feel the severity of illness is	GCI
Cognitive.f0229	0.921108	27.1775	3.45119e-148	2165	1460	0.310598	sdmt_correct,sdmt1	Symbol digit modality; total correct	UHDRS; Cognitive
Cognitive.f0654	0.894355	11.9724	3.49975e-31	902	229	0.301576	cogscore	Cognitive score	Combined cognitive assessment (Registry 2)
Cognitive.f0241	0.884178	26.8367	2.42602e-145	2176	1598	0.298145	stroop_correct,swr_correct,swrt1	Stroop word reading; total correct	UHDRS; Cognitive
Cognitive.f0237	0.820922	25.0224	4.89679e-128	2178	1620	0.276815	scnt1	Stroop color naming; total correct	UHDRS; Cognitive

## Sheet: cons_states_8_9
var	d	t_val	p_val	#samples_st8	#samples_st9	d_normalized	var_name	item	assessment
Functional.f0219	1.75251	59.5893	0	2077	2600	0.455302	fascore,functionscore	Functional assessment score	UHDRS; Func/Indep
Functional.f0220	1.74971	60.3063	0	2145	2656	0.454574	fiscore	Functional assessment score; incomplete	UHDRS; Func/Indep
Functional.f0213	1.70669	59.8348	0	2232	2710	0.443399	functionalscore,tfcscore	Functional score	UHDRS; TFC
Functional.f0221	1.57884	54.2898	0	2159	2657	0.410182	indepencescale,indepscl	Subject's independence in %	UHDRS; Func/Indep
Motor.f0179	1.50598	-52.4774	0	2240	2651	0.391254	motorscore,motscore	Motor score	UHDRS; Motor
Motor.f0180	1.46875	-51.6176	0	2266	2719	0.38158	miscore	Motor score; incomplete	UHDRS; Motor
Functional.f0217	1.42409	49.8819	0	2235	2711	0.369978	adl,fcadl	ADL	UHDRS; TFC
Motor.f0191	1.26661	-44.4975	0	2271	2703	0.329064	prosuphandsright,prosupr	Pronate/supinate-hands; right	UHDRS; Motor
GCI.f0863	1.24975	-33.3099	5.88237e-206	1510	1360	0.324686	svrtyll	Based on review of information, I feel the severity of illness is	GCI
Functional.f0216	1.24284	43.6551	0	2233	2710	0.32289	chores,fcdomestic	Domestic chores	UHDRS; TFC
Motor.f0192	1.23434	-43.3658	0	2271	2703	0.320681	prosuphandsleft,prosupl	Pronate/supinate-hands; left	UHDRS; Motor
Motor.f0210	1.2071	-42.4782	0	2269	2714	0.313604	tandem,tandemwalk	Tandem walking	UHDRS; Motor
Motor.f0209	1.20233	-42.2423	0	2267	2717	0.312366	gait	Gait	UHDRS; Motor
oculo.score	1.19409	-41.8882	0	2269	2689	0.310224		Mean oculo item value	UHDRS; Motor
Motor.f0211	1.18871	-41.7199	0	2263	2707	0.308827	retpulltest,retropls	Retropulsion pull test	UHDRS; Motor
finger.score	1.18441	-41.6299	0	2271	2708	0.30771		Mean finger score item value	UHDRS; Motor
Motor.f0187	1.1517	-40.5068	0	2272	2721	0.299211	dysarth,dysarthria	Saccade velocity; dysarthria	UHDRS; Motor
Motor.f0190	1.1345	-39.877	5.22722e-302	2271	2708	0.294742	fingertapsleft,fingtapl	Finger taps; left	UHDRS; Motor
Motor.f0189	1.10718	-38.9193	1.62339e-289	2272	2708	0.287646	fingertapsright,fingtapr	Finger taps; right	UHDRS; Motor
Cognitive.f0241	1.06586	29.467	3.54802e-168	1581	1474	0.27691	stroop_correct,swr_correct,swrt1	Stroop word reading; total correct	UHDRS; Cognitive
Motor.f0185	1.0177	-35.7038	1.13848e-248	2269	2690	0.264398	sacvelh,sacvelocityhor	Saccade velocity; horizontal	UHDRS; Motor
Motor.f0182	1.00652	-35.3656	1.37072e-244	2272	2703	0.261495	ocularv,ocupursuitver	Occular pursuit; vertical	UHDRS; Motor
Motor.f0181	1.00051	-35.1519	5.72163e-242	2272	2703	0.259933	ocularh,ocupursuithor	Occular pursuit; horizontal	UHDRS; Motor
Cognitive.f0237	0.991368	27.6742	7.43915e-151	1605	1500	0.257557	scnt1	Stroop color naming; total correct	UHDRS; Cognitive
CSRI.f0578	0.976318	3.87098	0.000263251	30	34	0.253647	csri47a	Receipt of crutches/sticks in the last 6 months	CSRI
Functional.f0218	0.962571	33.6428	1.28053e-223	2235	2711	0.250076	carelevl,fccarelevel	Care level	UHDRS; TFC
Cognitive.f0654	0.957695	9.9298	6.2219e-22	627	136	0.248809	cogscore	Cognitive score	Combined cognitive assessment (Registry 2)
Motor.f0186	0.955479	-33.5205	3.19662e-222	2269	2690	0.248233	sacvelocityver,sacvelv	Saccade velocity; vertical	UHDRS; Motor
Motor.f0184	0.951919	-33.4327	3.16905e-221	2270	2700	0.247308	sacinitiationver,sacinitv	Saccade initiation; vertical	UHDRS; Motor
Motor.f0183	0.913342	-32.0738	2.60116e-205	2270	2699	0.237286	sacinith,sacinitiationhor	Saccade initiation; horizontal	UHDRS; Motor
Cognitive.f0229	0.912146	22.6644	7.28105e-104	1481	1101	0.236976	sdmt_correct,sdmt1	Symbol digit modality; total correct	UHDRS; Cognitive
MMSE.f0291	0.909689	8.94787	6.51753e-18	157	361	0.236337	mmsetotal	MMSE score	MMSE
Cognitive.f0248	0.883525	17.0493	2.68295e-60	587	1117	0.22954	trl	Trailmaking test completed	Trailmaking test
Physio.f0322	0.88325	6.60313	1.81084e-10	95	209	0.229468	tug	Timed up and go test completed	Timed Up and Go
Motor.f0188	0.849679	-29.868	1.85115e-180	2271	2711	0.220747	tongue,tonprotrusion	Saccade velocity; tongue protusion	UHDRS; Motor
SF.f0797	0.843321	6.6995	5.43685e-11	438	85	0.219095	sf16	Health limiting bathing and dressing	SF-36
Cognitive.f0668	0.832044	6.37527	9.82415e-10	158	75	0.216165	mdrs3	Construction	Dementia rating scale 2
Functional.f0215	0.824943	28.9989	6.60905e-171	2239	2712	0.21432	fcfinances,finances,finances_tfc	Finances	UHDRS; TFC

## Sheet: jump_states_3_5
var	d	t_val	p_val	#samples_st3	#samples_st5	d_normalized	var_name	item	assessment
Functional.f0213	1.96958	40.3607	2.28214e-250	950	752	0.770302	functionalscore,tfcscore	Functional score	UHDRS; TFC
Functional.f0221	1.74384	30.1112	6.41758e-149	650	555	0.682017	indepencescale,indepscl	Subject's independence in %	UHDRS; Func/Indep
Functional.f0219	1.60564	27.0064	4.76947e-125	627	536	0.627967	fascore,functionscore	Functional assessment score	UHDRS; Func/Indep
Functional.f0220	1.58833	26.9295	5.99732e-125	635	549	0.621198	fiscore	Functional assessment score; incomplete	UHDRS; Func/Indep
asfascore	1.56472	13.2272	1.64614e-31	221	68	0.611962	fascore	Functional assessment score	UHDRS; Func/Indep
Functional.f0214	1.50773	30.889	1.13749e-166	950	752	0.589673	fcoccupation,occupatn	Occupation	UHDRS; TFC
Motor.f0180	1.38157	-23.7112	3.03372e-102	648	554	0.540332	miscore	Motor score; incomplete	UHDRS; Motor
GCI.f0863	1.33739	-15.1529	1.83967e-44	436	197	0.523055	svrtyll	Based on review of information, I feel the severity of illness is	GCI
Functional.f0216	1.32976	26.2339	5.99575e-126	887	674	0.520068	chores,fcdomestic	Domestic chores	UHDRS; TFC
Motor.f0179	1.26888	-26.2383	5.34399e-128	977	753	0.496259	motorscore,motscore	Motor score	UHDRS; Motor
Functional.f0215	1.13832	23.585	7.71145e-107	977	751	0.445195	fcfinances,finances,finances_tfc	Finances	UHDRS; TFC
Functional.f1247	1.11236	12.4723	2.64417e-31	305	201	0.435045	emplany,employment,uhdrs44	Gainful employment; any kind	UHDRS; Func/Indep
Functional.f1246	1.09807	11.9978	2.39115e-29	305	201	0.429456	employmentaccu,emplusl,uhdrs43	Gainful employment; accustomed work	UHDRS; Func/Indep
Motor.f2447	1.07148	-11.8614	1.03641e-28	293	200	0.419055	brady_tot	Total bradykinesia score	UHDRS; Motor
Functional.f2453	1.06339	-11.5149	2.77266e-27	293	193	0.415894	uhdrs80	Q80 diagnostic criteria	UHDRS
Motor.f0209	0.911692	-18.9748	3.62526e-73	989	765	0.356563	gait	Gait	UHDRS; Motor
CareQoL.f0446	0.885474	-3.77927	0.000299322	30	53	0.346309	cqol40	Frustrated by misconceptions of others towards HD relatives	CareQoL
CareQoL.f0448	0.849797	-3.47741	0.000808475	31	54	0.332356	cqol42	Frustrated by discrimination of others towards HD relatives	CareQoL
CSRI.f0767	0.837378	-6.49017	4.54651e-10	152	101	0.327498	csri54	Empolyment status	CSRI
chorea.score	0.823934	-17.0721	1.57292e-60	979	759	0.322241		Mean chorea item value	UHDRS; Motor
Motor.f0212	0.82048	-16.9741	6.35529e-60	981	764	0.32089	diagconf	Diagnostic confidence level	UHDRS; Motor

## Sheet: jump_states_4_6
var	d	t_val	p_val	#samples_st4	#samples_st6	d_normalized	var_name	item	assessment
Functional.f0213	2.06302	46.0969	0	1209	845	0.721852	functionalscore,tfcscore	Functional score	UHDRS; TFC
Motor.f0180	1.94927	-42.1748	1.25039e-275	1108	813	0.682049	miscore	Motor score; incomplete	UHDRS; Motor
Motor.f0179	1.91948	-43.2996	4.24688e-293	1228	869	0.671627	motorscore,motscore	Motor score	UHDRS; Motor
Motor.f2447	1.89112	-10.5229	1.7988e-19	96	47	0.661703	brady_tot	Total bradykinesia score	UHDRS; Motor
Functional.f0221	1.78415	37.576	1.30802e-229	1049	786	0.624276	indepencescale,indepscl	Subject's independence in %	UHDRS; Func/Indep
Functional.f0214	1.63547	36.5228	1.59089e-225	1213	845	0.572249	fcoccupation,occupatn	Occupation	UHDRS; TFC
Functional.f1246	1.52155	8.4402	3.5758e-14	100	42	0.532392	employmentaccu,emplusl,uhdrs43	Gainful employment; accustomed work	UHDRS; Func/Indep
Functional.f0219	1.48244	30.6811	2.02195e-166	1016	773	0.518705	fascore,functionscore	Functional assessment score	UHDRS; Func/Indep
Functional.f0220	1.475	30.8663	1.13614e-168	1041	785	0.516103	fiscore	Functional assessment score; incomplete	UHDRS; Func/Indep
GCI.f0863	1.40055	-22.5099	6.02161e-93	720	408	0.490051	svrtyll	Based on review of information, I feel the severity of illness is	GCI
Functional.f1247	1.4002	8.28833	8.43875e-14	100	42	0.48993	emplany,employment,uhdrs44	Gainful employment; any kind	UHDRS; Func/Indep
Functional.f2453	1.36973	-6.78125	3.3979e-10	95	42	0.479267	uhdrs80	Q80 diagnostic criteria	UHDRS
Functional.f0216	1.26927	28.2821	1.05035e-148	1200	838	0.444119	chores,fcdomestic	Domestic chores	UHDRS; TFC
Motor.f2446	1.25299	-7.15773	4.12818e-11	96	47	0.438421	oculo	Total oculo score	UHDRS; Motor
Cognitive.f0654	1.1363	9.20038	1.02247e-18	400	93	0.397593	cogscore	Cognitive score	Combined cognitive assessment (Registry 2)
Functional.f0215	1.07228	24.2726	6.2578e-115	1241	862	0.375189	fcfinances,finances,finances_tfc	Finances	UHDRS; TFC
oculo.score	1.03484	-23.4081	6.70615e-108	1233	875	0.362092		Mean oculo item value	UHDRS; Motor
Motor.f2449	1.02394	-6.04734	1.25316e-08	96	47	0.358278	dystonia	Total dystonia score	UHDRS; Motor
Motor.f0209	1.01657	-22.9833	1.76389e-104	1235	872	0.355697	gait	Gait	UHDRS; Motor
Motor.f0210	0.999705	-22.5931	2.2868e-101	1232	873	0.349797	tandem,tandemwalk	Tandem walking	UHDRS; Motor
Motor.f0191	0.957898	-21.6646	4.00892e-94	1232	875	0.335169	prosuphandsright,prosupr	Pronate/supinate-hands; right	UHDRS; Motor
brady.score	0.944297	-21.3571	9.10713e-92	1233	875	0.33041		Mean bradykinesia item value	UHDRS; Motor	Note that total bradykinesia score also appears (under var_name 'brady_tot') appears aleswhere - so not a signature
Motor.f0196	0.944297	-21.3571	9.10713e-92	1233	875	0.33041	bradkinbody,brady	Bradykinesia; body	UHDRS; Motor	Swati/Cristina - is this the only bradykinesia item in the UHDRS motor? I don't see any others - and struggling to distinguish this score from the 'total' score
finger.score	0.933496	-21.1147	6.4346e-90	1232	875	0.32663		Mean finger score item value	UHDRS; Motor
Motor.f0187	0.931604	-21.0728	1.32429e-89	1233	875	0.325968	dysarth,dysarthria	Saccade velocity; dysarthria	UHDRS; Motor
chorea.score	0.92369	-20.8868	3.39486e-88	1233	874	0.323199		Mean chorea item value	UHDRS; Motor
Functional.f0217	0.909736	20.2667	2.42106e-83	1201	838	0.318317	adl,fcadl	ADL	UHDRS; TFC
Functional.f1255	0.886012	6.06977	1.00236e-08	112	40	0.310016	laundry,uhdrs52	Laundry without help	UHDRS; Func/Indep
Motor.f0192	0.87899	-19.8846	9.02002e-81	1233	875	0.307559	prosuphandsleft,prosupl	Pronate/supinate-hands; left	UHDRS; Motor
Motor.f0189	0.870266	-19.6848	2.56729e-79	1232	875	0.304506	fingertapsright,fingtapr	Group finger taps; right	UHDRS; Motor
Cognitive.f0229	0.860449	17.5803	1.18025e-63	960	727	0.301071	sdmt_correct,sdmt1	Symbol digit modality; total correct	UHDRS; Cognitive
PBAHD.f0742	0.860328	-3.22648	0.00201686	32	31	0.301029	pbal19fr	Quality of work; frequency	PBA
Motor.f0190	0.856628	-19.3792	4.04397e-77	1233	875	0.299734	fingertapsleft,fingtapl	Group finger taps; left	UHDRS; Motor
Scl90r.f2486	0.854282	-4.37321	2.89253e-05	75	32	0.298913	tsclpsdi_c	Companion SCL90 positive symptom distress index T score	Unknown source assessment
Motor.f0186	0.841057	-19.024	1.36257e-74	1233	875	0.294286	sacvelocityver,sacvelv	Saccade velocity; vertical	UHDRS; Motor
Motor.f0185	0.83911	-18.9807	2.75693e-74	1233	875	0.293605	sacvelh,sacvelocityhor	Saccade velocity; horizontal	UHDRS; Motor
dystonia.score	0.831909	-18.7996	5.26618e-73	1233	872	0.291085		Mean dystonia item value	UHDRS; Motor
Cognitive.f0241	0.828217	16.6282	1.81645e-57	922	708	0.289793	stroop_correct,swr_correct,swrt1	Stroop word reading; total correct	UHDRS; Cognitive
Functional.f1253	0.819071	4.857	3.16722e-06	99	42	0.286593	automobile,drive,uhdrs50	Operate automobile safely and independently	UHDRS; Motor
Cognitive.f1134	0.816984	3.60898	0.000499866	63	31	0.285863	emo_negative_numbercorrect,NEGSUM_STATIC	Ability to identify static negative facial expressions; sum score	Emotional recognition test (Track-HD)
PBAHD.f0741	0.807822	-3.07533	0.0031448	32	31	0.282657	pbal19sv	Quality of work; severity	PBA
Cognitive.f0237	0.806295	16.1183	2.60626e-54	909	707	0.282123	scnt1	Stroop color naming; total correct	UHDRS; Cognitive

[truncated: 1 more sheets: Sheet1]
