# Supplementary material for: Large-scale screening of clinical assessments to distinguish between states in the Integrated HD Progression Model (IHDPM)
Source: Front Aging Neurosci. 2024 Feb 13;16:1320755. doi: 10.3389/fnagi.2024.1320755 (PMC10896990; doi:10.3389/fnagi.2024.1320755)
Supplement: SUPPLEMENTARY TABLE S2 — IHDPM state pairwise comparison results; all items. Assessment items (all) are listed in rank order by absolute effect size. Results limited to items with a minimum of 30 observations in each state within the specified pair. [file Table_2.XLSX]

## Sheet: cons_states_1_2
var	d	t_val	p_val	#samples_st1	#samples_st2	d_normalized	var_name
Motor.f0180	1.89947	-14.957	1.51523e-37	140	141	0.226607	miscore
SF.f0368	1.83597	-10.8636	3.52491e-20	42	96	0.219031	mh,mh_nbs,mhsubscore
SF.f0364	1.77244	-10.6744	1.06854e-19	42	96	0.211452	gh,gh_nbs,ghsubscore
SF.f0366	1.70029	-10.3534	6.98767e-19	42	96	0.202845	sf,sf_nbs,sfsubscore
Motor.f0212	1.60181	-22.5499	1.00451e-87	480	330	0.191095	diagconf
SF.f0363	1.5349	-10.8217	4.50711e-20	42	96	0.183114	bp,bp_nbs,bpsubscore
Motor.f0179	1.52642	-21.2172	3.49034e-79	471	309	0.182102	motorscore,motscore
SF.f0367	1.44881	-8.33821	7.40474e-14	42	96	0.172843	re,re_nbs,resubscore
SF.f0365	1.44766	-9.06854	1.31214e-15	42	94	0.172706	vt,vt_nbs,vtsubscore
SF.f0362	1.42091	-8.77489	6.61511e-15	42	95	0.169515	rp,rp_nbs,rpsubscore
GCI.f0863	1.36257	-8.10549	1.99948e-13	97	50	0.162554	svrtyll
SF.f0361	1.2748	-7.63193	3.98542e-12	42	93	0.152083	pf,pf_nbs,pfsubscore
chorea.score	1.24895	-17.4938	4.53835e-58	475	308	0.149
Motor.f2450	1.17401	-12.9203	7.44385e-33	302	166	0.140059	chorea
Motor.f2447	1.08674	-11.8394	1.86872e-28	302	166	0.129648	brady_tot
Summary.f0780	1.06802	-6.79954	1.83255e-10	115	52	0.127415	dxentire
Motor.f0206	1.00366	-13.9704	9.39923e-40	475	308	0.119736	chorealue,chorlue
Summary.f0778	0.977237	5.95545	1.48938e-08	115	54	0.116584	impwrsex
CSRI.f0458	0.974579	-3.88701	0.000203505	33	52	0.116267	csri1
Motor.f0205	0.932958	-12.9941	4.27021e-35	475	309	0.111302	chorearue,chorrue
Cognitive.f0255	0.873177	10.8107	3.90179e-25	335	307	0.10417	verflt
Motor.f0207	0.853741	-11.8932	4.23561e-30	475	309	0.101851	chorearle,chorrle
Motor.f0208	0.827983	-11.5185	1.81788e-28	475	309	0.0987784	chorealle,chorlle
WHODAS.f2385	0.823458	-3.14457	0.00216341	35	72	0.0982385	whodasp5_2
Motor.f0204	0.795789	-11.1517	6.64033e-27	475	309	0.0949376	choreatrunk,chortrnk
Motor.f0202	0.774076	-10.8415	1.30576e-25	475	309	0.0923473	choreaface,chorface
finger.score	0.748898	-10.3566	1.22449e-23	474	308	0.0893435
oculo.score	0.724699	-10.0556	1.88052e-22	474	309	0.0864566
PBAs.f0606	0.702283	2.9854	0.00365678	30	61	0.0837824	basdeprworst,pbas1wo
WHODAS.f2384	0.699739	-2.86118	0.00481549	36	118	0.0834788	whodasp5_1
Motor.f0189	0.69309	-9.6093	9.70985e-21	475	308	0.0826857	fingertapsright,fingtapr
Motor.f0184	0.688758	-9.58292	1.21692e-20	475	309	0.0821688	sacinitiationver,sacinitv
WHODAS.f2514	0.682897	-2.97628	0.0033925	37	118	0.0814696	whodasp1_4
Motor.f0203	0.681012	-9.53924	1.77575e-20	475	309	0.0812448	chorbol,choreabol
WHODAS.f2401	0.676373	-2.80212	0.0057518	36	115	0.0806913	whodasp_total12
WHODAS.f2513	0.664848	-2.84644	0.00530923	36	72	0.0793164	whodasp1_3
Motor.f0190	0.658046	-9.07682	8.95758e-19	474	309	0.0785049	fingertapsleft,fingtapl
Motor.f0192	0.653974	-9.08208	8.55329e-19	475	309	0.0780191	prosuphandsleft,prosupl
Cognitive.f0229	0.65147	9.09	7.7743e-19	458	338	0.0777204	sdmt_correct,sdmt1
Functional.f2453	0.639662	-7.04258	6.82565e-12	300	167	0.0763116	uhdrs80
WHODAS.f2518	0.613764	-2.54892	0.0122373	36	72	0.073222	whodasp2_2
Cognitive.f0237	0.592945	7.92469	8.64084e-15	411	315	0.0707383	scnt1
Functional.f0221	0.591634	4.78084	2.71611e-06	145	163	0.0705819	indepencescale,indepscl
WHODAS.f2392	0.589215	-2.33872	0.0206789	36	115	0.0702933	whodasp6_1
WHODAS.f2380	0.584514	-2.26413	0.0249805	36	118	0.0697325	whodasp4_2
hdcat_l	0.58342	-6.68822	5.3776e-11	310	265	0.069602
Cognitive.f0245	0.582853	7.74136	3.35847e-14	410	308	0.0695343	sit1
WHODAS.f2400	0.582733	-2.52673	0.013065	34	69	0.0695201	whodasp_total36
MHx.f0103	0.571086	3.02434	0.00310768	52	59	0.0681305	hxtobab,smoking,smoking_hx
Motor.f2446	0.564931	-6.03825	3.18562e-09	302	166	0.0673962	oculo
Motor.f0191	0.562748	-7.84959	1.3736e-14	475	309	0.0671358	prosuphandsright,prosupr
Medical.f0141	0.561492	3.95571	0.000113602	34	131	0.066986	drugab
Enrollment.f0093	0.552018	-3.5592	0.000481711	98	75	0.0658558	rfstdy
Motor.f0196	0.546259	-7.63919	6.39291e-14	475	309	0.0651687	bradkinbody,brady
brady.score	0.546259	-7.63919	6.39291e-14	475	309	0.0651687
Summary.f0779	0.543651	3.24187	0.00143367	115	54	0.0648576	impwrssj
Functional.f0220	0.54006	4.25928	2.80935e-05	138	142	0.0644292	fiscore
Cognitive.f0248	0.534894	-6.66166	6.17276e-11	315	282	0.0638128	trl
WHODAS.f2517	0.531611	-2.18364	0.0305223	37	117	0.0634211	whodasp2_1
PBAs.f0332	0.527604	3.18301	0.0017701	51	102	0.0629431	basdeprfre,pbas1fr
rigidity.score	0.523117	-7.25262	9.84565e-13	475	309	0.0624078
Cognitive.f0249	0.514832	-5.63395	2.9619e-08	241	255	0.0614195	traila_time,trla1
WHODAS.f2386	0.510208	-2.0812	0.0398482	35	72	0.0608678	whodasp5_3
WHODAS.f2374	0.508547	-1.99712	0.0475974	37	117	0.0606697	whodasp2_5
Cognitive.f0241	0.508533	6.97316	6.76579e-12	423	335	0.060668	stroop_correct,swr_correct,swrt1
MRI.f2488	0.508274	3.52975	0.000514042	129	77	0.0606371	caudate
Motor.f0183	0.507998	-7.02337	4.71019e-12	475	309	0.0606041	sacinith,sacinitiationhor
WHODAS.f2387	0.506309	-2.10999	0.0372351	35	72	0.0604027	whodasp5_4
Functional.f0219	0.505546	4.0706	5.99384e-05	141	163	0.0603116	fascore,functionscore
PBAs.f0331	0.501886	2.96443	0.00352515	51	102	0.0598751	basdepr,pbas1sv
Motor.f2448	0.501802	-5.37721	1.19889e-07	302	166	0.059865	rigidity
Motor.f0195	0.50089	-6.94009	8.23041e-12	475	309	0.0597562	rigarml,rigarmsleft
WHODAS.f2395	0.491936	-2.18749	0.0309035	36	72	0.0586879	whodasp6_4
MRI.f2507	0.486459	3.41528	0.00076873	129	77	0.0580345	parietal_w
Functional.f0214	0.4756	6.53711	1.13612e-10	446	332	0.0567391	fcoccupation,occupatn
Motor.f0209	0.475392	-6.71403	3.56594e-11	480	330	0.0567143	gait
PBAs.f0335	0.472935	2.87927	0.0045653	51	102	0.0564212	basanx,pbas3sv
Motor.f0210	0.468638	-6.51247	1.32286e-10	475	308	0.0559085	tandem,tandemwalk
Motor.f0186	0.468616	-6.47568	1.66798e-10	474	309	0.0559059	sacvelocityver,sacvelv
Motor.f0182	0.468151	-6.46421	1.79136e-10	475	309	0.0558505	ocularv,ocupursuitver
MRI.f2498	0.466301	-3.21996	0.00149189	129	77	0.0556297	csf
MRI.f2506	0.459025	3.21958	0.00149377	129	77	0.0547617	frontal_w
HDCC.f0064	0.458548	2.95893	0.00358172	65	89	0.0547047	ccirb,irritability
MRI.f2495	0.455329	-3.17546	0.0017279	129	77	0.0543208	crblwm
Motor.f0194	0.454683	-6.29048	5.2638e-10	475	309	0.0542436	rigarmr,rigarmsright
PBAs.f0608	0.452718	2.07802	0.040588	30	61	0.0540092	basanxworst,pbas3wo
Motor.f0185	0.452515	-6.2592	6.37408e-10	475	309	0.0539851	sacvelh,sacvelocityhor
Functional.f0213	0.451528	6.21527	8.35328e-10	446	333	0.0538673	functionalscore,tfcscore
CSRI.f0464	0.441822	-1.63869	0.105064	33	52	0.0527093	csri3
CSRI.f0506	0.441822	-1.63869	0.105064	33	52	0.0527093	csri16
WHODAS.f2511	0.437734	-1.96516	0.051207	37	118	0.0522217	whodasp1_1
Motor.f0181	0.434614	-6.0119	2.81179e-09	475	309	0.0518495	ocularh,ocupursuithor
MHx.f0102	0.4316	2.10647	0.0379158	34	59	0.0514899	alcoholabuse,hxalcab
Cognitive.f0233	0.417753	2.21797	0.0279743	32	129	0.049838	verfct5
Medical.f0135	0.416171	-2.16083	0.0321684	34	131	0.0496492	alcab
MRI.f2497	0.414582	2.91528	0.00395078	129	77	0.0494597	crbrwm
HADS.f0387	0.413646	2.42165	0.0166276	41	113	0.049348	inwardirrscore,inwscore
MHx.f0107	0.395639	1.89243	0.0616125	34	59	0.0471997	druguse,hxdrugab
WHODAS.f2520	0.395381	-1.53141	0.128647	36	72	0.047169	whodasp2_4
Functional.f1273	0.392013	4.26289	2.41808e-05	305	191	0.0467672	fcinfosource,tfcsrc,uhdrs75
WHODAS.f2512	0.390364	-1.7983	0.0749751	36	72	0.0465704	whodasp1_2
Cognitive.f0254	0.390116	-1.79564	0.0748745	37	95	0.0465409	trialb_error,trlb3
WHODAS.f2376	0.389891	-1.51025	0.133055	36	118	0.046514	whodasp3_2
HDCC.f0060	0.387823	-2.33466	0.0208962	62	89	0.0462673	ccmtr,motor
Cognitive.f0247	0.380924	-1.60521	0.110536	31	122	0.0454442	sit3
Summary.f0777	0.379158	-2.25127	0.0256724	115	54	0.0452335	visitprp
MRI.f2508	0.377746	2.65403	0.00858066	129	77	0.045065	occipital_w
Functional.f1246	0.374878	4.13874	4.10436e-05	306	191	0.044723	employmentaccu,emplusl,uhdrs43
WHODAS.f2398	0.374794	-1.72243	0.0879354	36	71	0.044713	whodasp6_7
WHODAS.f2397	0.372984	-1.68356	0.0952369	35	72	0.044497	whodasp6_6
CSRI.f0545	0.368077	-1.6289	0.107124	33	52	0.0439116	csri31
WHODAS.f2375	0.363934	-1.42921	0.154982	37	118	0.0434173	whodasp3_1
Motor.f0188	0.358345	-4.9965	7.21792e-07	470	308	0.0427506	tongue,tonprotrusion
dystonia.score	0.345719	-4.82088	1.71871e-06	474	307	0.0412443
WHODAS.f2382	0.345287	-1.41015	0.161567	34	69	0.0411927	whodasp4_4
Functional.f0215	0.344546	4.80661	1.83926e-06	474	314	0.0411043	fcfinances,finances,finances_tfc
Motor.f2449	0.341379	-3.7226	0.000221343	301	166	0.0407265	dystonia
PBAs.f0610	0.340076	1.68584	0.0953296	30	61	0.0405711	basbehworst,pbas5wo
Motor.f0187	0.339597	-4.73373	2.61648e-06	475	309	0.0405139	dysarth,dysarthria
base.model.na.prop	0.337592	-4.78697	2.00672e-06	480	346	0.0402748
WHODAS.f2396	0.337568	-1.65857	0.0992786	37	116	0.0402718	whodasp6_5
Cognitive.f0258	0.332084	-1.57296	0.117923	31	115	0.0396176	verflt07
Functional.f0216	0.327273	4.16083	3.5966e-05	403	250	0.0390437	chores,fcdomestic
PBAs.f0336	0.322908	1.9281	0.0557188	51	102	0.0385229	basanxfre,pbas3fr
Motor.f0198	0.321706	-4.51287	7.37998e-06	474	309	0.0383795	dystrue,maxdysrue
Cognitive.f0239	0.318055	-1.40516	0.161913	33	129	0.0379439	scnt3
WHODAS.f2381	0.317763	-1.42861	0.156086	35	72	0.0379092	whodasp4_3
HADS.f0383	0.315405	2.06481	0.0404772	57	113	0.0376278	anxscore
PBAs.f0607	0.314588	1.49408	0.138692	30	61	0.0375304	bassuicworst,pbas2wo
WHODAS.f2394	0.313147	-1.26641	0.208144	36	72	0.0373584	whodasp6_3
WHODAS.f2378	0.312288	-1.19262	0.235842	35	67	0.0372559	whodasp3_4
WHODAS.f2377	0.307428	-1.17399	0.243057	35	72	0.0366761	whodasp3_3
CSRI.f0549	0.306103	-1.13532	0.259511	33	52	0.0365181	csri33
Cognitive.f0257	0.305613	-1.42963	0.154991	31	115	0.0364597	verflt06
Cognitive.f0234	0.303548	-1.10847	0.269333	32	129	0.0362133	verfct6
PBAs.f0613	0.30131	1.46546	0.14632	30	61	0.0359463	basobscompworst,pbas8wo
MRI.f2509	0.30106	2.11671	0.0354965	129	77	0.0359165	temporal_w
Cognitive.f1214	0.296718	-2.32538	0.0206746	224	99	0.0353984	smell_pct,upsitresponses
WHODAS.f2519	0.294955	-1.35923	0.17696	36	72	0.0351881	whodasp2_3
FrSBeF.f1350	0.291908	-1.58052	0.115999	48	111	0.0348246	exec_c,execdysscore_f
PBAs.f0609	0.290592	1.34509	0.182015	30	61	0.0346677	basirritworst,pbas4wo
Medical.f0136	0.288096	-1.35042	0.179061	43	99	0.0343699	alcunits
PBAs.f0339	0.284467	1.79905	0.0740083	51	102	0.033937	basbeh,pbas5sv
CSRI.f0541	0.281515	-1.15055	0.253221	33	52	0.0335848	csri29
Motor.f0199	0.27932	-3.90153	0.000103847	474	307	0.0333229	dystlue,maxdyslue
MRI.f2489	0.277852	1.93146	0.0548117	129	77	0.0331478	putamen
HDCC.f0072	0.277602	-1.46895	0.14381	67	95	0.0331179	ccpsy,psychosis
WHODAS.f2515	0.270292	-1.25227	0.213226	36	72	0.0322458	whodasp1_5
WHODAS.f2379	0.269751	-1.27735	0.203425	36	118	0.0321812	whodasp4_1
HADS.f0386	0.266477	1.53823	0.126071	41	113	0.0317907	outscore,outwardirrscore
MRI.f2503	0.265486	-1.87411	0.0623453	129	77	0.0316725	parietal_g
PBAs.f0342	0.264862	1.61948	0.107431	51	102	0.0315981	basapathfre,pbas6fr
Behaviour.f0919	0.259862	-1.3194	0.189589	89	31	0.0310015	deprrfr
Cognitive.f0256	0.25735	2.75037	0.00615595	368	165	0.0307019	verflt05
HADS.f0385	0.247807	1.59396	0.112825	57	113	0.0295634	irrscore
Behaviour.f0921	0.247167	-1.20968	0.228741	93	31	0.029487	isobt
PBAs.f0346	0.245193	1.51647	0.131608	43	102	0.0292515	basobscompfre,pbas8fr
Scl90r.f2475	0.243941	1.9494	0.052058	255	92	0.0291021	tsomatiz_c
Motor.f0193	0.235075	-3.29705	0.00101979	480	329	0.0280444	luria
Behaviour.f0900	0.234853	-1.28654	0.20065	95	31	0.028018	suicfr
Behaviour.f0901	0.234853	-1.28654	0.20065	95	31	0.028018	suicsv
Scl90r.f2476	0.231367	-2.14443	0.0326513	256	115	0.0276021	tobsess_c
PBAs.f0611	0.229911	1.06004	0.291995	30	61	0.0274284	basapathworst,pbas6wo
CSRI.f0473	0.228317	1.25967	0.21132	33	52	0.0272383	csri6
Cognitive.f0222	0.224648	-1.50063	0.13541	33	130	0.0268005	gen1
PBAs.f0341	0.219096	1.32352	0.187662	51	102	0.0261381	basapath,pbas6sv
Cognitive.f0252	0.217727	-2.36178	0.0185768	240	253	0.0259748	trailb_time,trlb1
PBAs.f0337	0.21616	1.32818	0.186124	51	102	0.0257878	basirrit,pbas4sv
MRI.f2502	0.215575	-1.52728	0.128239	129	77	0.0257181	frontal_g
MRI.f2490	0.214746	-1.50306	0.13437	129	77	0.0256192	hippocampus
CSRI.f0515	0.214315	-0.79488	0.428951	33	52	0.0255678	csri19
CSRI.f0479	0.214315	-0.79488	0.428951	33	52	0.0255678	csri7
CSRI.f0539	0.212951	-0.883842	0.379335	33	52	0.025405	csri28
CSRI.f0536	0.212951	-0.883842	0.379335	33	52	0.025405	csri26
CSRI.f0485	0.212951	-0.883842	0.379335	33	52	0.025405	csri9
Cognitive.f0235	0.212316	-0.924526	0.356614	32	129	0.0253292	verfct7
Behaviour.f0898	0.212306	0.994995	0.321677	95	31	0.0253281	anxifr
PBAs.f0345	0.212282	1.27152	0.205608	43	102	0.0253253	basobscomp,pbas8sv
Functional.f2455	0.210159	1.74319	0.0824736	125	139	0.0250719	uhdrs82
Motor.f0197	0.208728	-2.91739	0.00363099	474	309	0.0249013	dysttrnk,maxdystrunk
MRI.f2510	0.20807	1.47105	0.142819	129	77	0.0248228	icv_gw
Behaviour.f0910	0.204253	0.864722	0.388861	95	31	0.0243674	delusfr
Functional.f1254	0.202927	2.14133	0.0330049	263	58	0.0242092	houeswork,housewrk,uhdrs51
Behaviour.f0920	0.197741	0.837118	0.404219	89	31	0.0235905	irritrfr
Cognitive.f0242	0.193946	-0.719237	0.47305	33	128	0.0231377	swrt2
Functional.f1253	0.192888	2.14398	0.0325215	305	191	0.0230116	automobile,drive,uhdrs50
MRI.f2494	0.189343	1.31444	0.190174	129	77	0.0225886	crblgm
SF.f0370	0.18695	-1.0698	0.286675	42	91	0.0223032	mcs,mcsum
PBAs.f0340	0.185027	1.11579	0.266283	51	102	0.0220738	basbehfre,pbas5fr
Functional.f1247	0.184269	2.02849	0.0430449	306	191	0.0219833	emplany,employment,uhdrs44
CSRI.f0482	0.182719	-0.823748	0.412444	33	52	0.0217983	csri8
FrSBeS.f1300	0.181697	-1.17325	0.242098	62	139	0.0216764	exec_p,execdysscore
Behaviour.f0906	0.181389	0.789904	0.431092	95	31	0.0216397	obsessfr
Behaviour.f0911	0.181312	0.7676	0.444184	95	31	0.0216305	delussv
HDCC.f0062	0.180979	-1.12419	0.262639	65	95	0.0215909	ccdep,depression
WHODAS.f2383	0.176126	0.944054	0.347373	35	69	0.0210118	whodasp4_5
FrSBeF.f1348	0.170743	0.966123	0.335469	49	110	0.0203696	apathy_c,apathyscore_f
FrSBeF.f1349	0.170636	-0.957768	0.339671	48	109	0.0203569	disin_c,disinhibscore_f
Cognitive.f0246	0.168228	-0.745608	0.457063	31	122	0.0200696	sit2
Behaviour.f0915	0.166858	-0.823991	0.41154	94	31	0.0199062	apathsv
Behaviour.f0907	0.164017	0.721898	0.471717	95	31	0.0195672	obsesssv
Behaviour.f0899	0.162827	0.767452	0.444272	95	31	0.0194252	anxisv
Functional.f1248	0.162685	-0.943489	0.346145	263	58	0.0194084	uhdrs45,volunt,volunteer
PBAs.f0338	0.161675	0.969844	0.333675	51	102	0.0192879	basirritfre,pbas4fr
handed	0.161421	-0.923189	0.357299	53	109	0.0192575
Cognitive.f0231	0.156641	-1.05078	0.294934	33	130	0.0186873	verfct
Functional.f2452	0.155362	-1.44502	0.149206	299	119	0.0185347	uhdrs76
Scl90r.f2464	0.154641	-1.50708	0.132556	277	137	0.0184487	tobsess_p
Scl90r.f2477	0.153485	1.23325	0.218321	255	92	0.0183108	tsensitiv_c
WHODAS.f2516	0.14741	-0.684552	0.495121	36	72	0.017586	whodasp1_6
PBAs.f0357	0.147402	-0.747836	0.455722	51	102	0.0175851	basorientfre,pbas11fr
FrSBeS.f1298	0.145905	1.0339	0.302426	63	140	0.0174065	apathy_p,apathyscore
Behaviour.f0903	0.145236	0.654569	0.513978	93	31	0.0173267	aggrsv
WHODAS.f2399	0.139554	-0.652282	0.515672	36	69	0.0166487	whodasp6_8
MRI.f2492	0.138619	-0.963051	0.336662	129	77	0.0165373	accumbens
Cognitive.f0244	0.137594	1.6985	0.0898989	335	307	0.016415	sit
WHODAS.f2393	0.137202	-0.601477	0.548806	36	72	0.0163682	whodasp6_2
Functional.f1271	0.136288	1.47158	0.141772	305	190	0.0162591	fasrc,funcassfrom,uhdrs68
MRI.f2496	0.136022	-0.963435	0.33647	129	77	0.0162274	crbrgm
CSRI.f0470	0.135558	-0.5754	0.566577	33	52	0.0161721	csri5
WHODAS.f2389	0.133761	-0.612352	0.541884	32	58	0.0159577	whodasp5_6
Cognitive.f0243	0.130683	-0.600083	0.549305	33	128	0.0155905	swrt3
Behaviour.f0908	0.118168	-0.601069	0.548891	95	31	0.0140974	compulfr
Behaviour.f0914	0.117587	-0.575534	0.565982	94	31	0.0140282	apathfr
Motor.f0211	0.115638	-1.59264	0.111646	474	309	0.0137956	retpulltest,retropls
PBAs.f0614	0.113003	0.531356	0.596496	30	61	0.0134813	basdelworst,pbas9wo
Behaviour.f0894	0.110728	0.530808	0.596501	95	31	0.0132099	deprfr
Motor.f0200	0.109367	-1.51818	0.129375	474	309	0.0130475	dystrle,maxdysrle
FrSBeF.f1347	0.108236	-0.598493	0.550402	47	107	0.0129125	frsbescore_f,frsbetot_companion
PBAs.f0348	0.106013	0.713034	0.476925	51	102	0.0126473	basdelfre,pbas9fr
asfascore	0.105527	0.620588	0.535353	258	37	0.0125894
Behaviour.f0905	0.104666	-0.493533	0.622509	95	31	0.0124866	irritsv
Scl90r.f2468	0.0991032	-0.976438	0.329415	267	151	0.011823	thostility_p
Behaviour.f0909	0.0961925	-0.482331	0.630421	95	31	0.0114758	compulsv
HDCC.f0075	0.0932116	-0.551034	0.582441	61	89	0.0111201	cccog,dementia
Behaviour.f0918	0.0931367	0.436835	0.663029	89	31	0.0111112	deprexam
Cognitive.f0251	0.090878	-0.364683	0.71594	37	95	0.0108417	triala_error,trla3
Medical.f0137	0.0896063	-0.462336	0.644457	34	131	0.01069	tobab
HDCC.f0070	0.087177	-0.513295	0.608516	60	89	0.0104002	ccpob,obsessive
PBAs.f0358	0.086115	0.503176	0.615574	51	102	0.0102735	basrelative,pbainfo
Scl90r.f2469	0.0851127	-0.826947	0.408794	271	105	0.0101539	tphobic_p
Scl90r.f2483	0.0811155	0.644184	0.519895	246	92	0.00967708	tpsychoticism_c
Scl90r.f2481	0.0799616	0.612663	0.540503	254	93	0.00953941	tphobic_c
Scl90r.f2472	0.0794995	-0.674671	0.500356	243	90	0.0094843	tsclgsi_p
Scl90r.f2485	0.0779586	0.5916	0.554591	204	81	0.00930046	tsclpst_c
Scl90r.f2467	0.076267	-0.698867	0.485067	272	106	0.00909866	tanxiety_p
MRI.f2493	0.0761989	0.53073	0.596184	129	77	0.00909053	globus
Functional.f1252	0.0749782	-0.789753	0.43005	306	191	0.0089449	children,children_function,supchild,uhdrs49
Functional.f1249	0.0740948	0.812134	0.41708	339	192	0.00883951	fafinan,finances,finances_function,uhdrs46
SF.f0369	0.0735302	-0.426679	0.670313	42	91	0.00877215	pcs,pcsum
Motor.f0201	0.0719502	-0.994245	0.320411	474	309	0.00858366	dystlle,maxdyslle
Scl90r.f2466	0.0708388	-0.619555	0.53593	272	102	0.00845107	tdepress_p
PBAs.f0356	0.0708251	-0.385705	0.700258	51	102	0.00844943	basorient,pbas11sv
Scl90r.f2484	0.0703964	-0.55854	0.576895	213	87	0.00839828	tsclgsi_c
PBAs.f0343	0.0699102	0.361305	0.718437	35	102	0.00834028	baspersev,pbas7sv
CSRI.f0543	0.069111	0.32453	0.746353	33	52	0.00824494	csri30
Cognitive.f0240	0.0680354	0.886056	0.375891	373	330	0.00811662	stroop,swrt
MRI.f2499	0.0658458	0.454097	0.650241	129	77	0.0078554	vb
motor_examiner_ext	0.0657541	-0.678415	0.497853	299	159	0.00784446
Functional.f0218	0.0652537	-0.786416	0.431909	404	250	0.00778477	carelevl,fccarelevel
Scl90r.f2480	0.0636273	0.584022	0.559554	252	128	0.00759074	thostility_c
observed.aoo	0.0609578	0.605733	0.54503	242	167	0.00727226
Functional.f0217	0.0584183	0.727338	0.46728	404	250	0.00696931	adl,fcadl
PBAs.f0334	0.058231	0.350235	0.72665	51	102	0.00694696	bassuicfre,pbas2fr
HDCC.f0065	0.0582224	-0.239669	0.811329	30	38	0.00694593	ccirbage,irritage
Behaviour.f0904	0.0571184	-0.271974	0.786094	95	31	0.00681423	irritfr
factor.score.prod	0.0570577	-0.809063	0.418712	480	346	0.00680698
MRI.f2500	0.0557593	-0.384297	0.701158	129	77	0.00665209	other
PBAs.f0333	0.0530695	0.317386	0.751389	51	102	0.00633119	bassuic,pbas2sv
Cognitive.f0238	0.0477452	-0.211379	0.832861	33	129	0.005696	scnt2
WHODAS.f2390	0.0459558	-0.209762	0.834338	32	58	0.00548253	whodasp5_7
Behaviour.f0895	0.0449294	0.220091	0.826162	95	31	0.00536008	deprsv
cal.aoo	0.0405625	0.575166	0.565336	480	346	0.00483911
CSRI.f0461	0.0397691	-0.177328	0.859682	33	52	0.00474445	csri2
Scl90r.f2479	0.0386866	0.316686	0.751673	255	93	0.00461531	tanxiety_c
HDCC.f0068	0.0378827	-0.228238	0.819774	62	89	0.00451941	apathy,ccapt
BDI.f2462	0.0361375	0.28896	0.772802	236	81	0.0043112	bdiscore,bditotal
Scl90r.f2463	0.0352935	0.304598	0.76084	276	105	0.00421051	tsomatiz_p
MRI.f2487	0.0330138	-0.228983	0.819112	129	77	0.00393855	scan_id
Functional.f2454	0.0322879	0.262126	0.793429	126	139	0.00385195	uhdrs81
MRI.f2491	0.0318413	-0.222387	0.824235	129	77	0.00379866	thalamus
PBAs.f0347	0.0309004	0.177978	0.858979	51	102	0.00368642	basdel,pbas9sv
Cognitive.f0230	0.0307445	-0.144784	0.885063	33	130	0.00366782	sdmt2
Behaviour.f0889	0.0305074	0.142492	0.886922	95	31	0.00363953	biscore
PBAs.f0616	0.02944	-0.124954	0.900841	30	61	0.00351219	basorientworst,pbas11wo
Scl90r.f2465	0.0285768	0.248027	0.804248	276	105	0.00340921	tsensitiv_p
WHODAS.f2391	0.0285533	-0.125583	0.900349	32	58	0.00340641	whodasp5_8
Scl90r.f2478	0.0284099	-0.243308	0.807916	245	91	0.0033893	tdepress_c
HDCC.f0066	0.0271684	-0.162603	0.871053	61	89	0.00324119	ccvab,violent
HADS.f0384	0.0257984	0.157119	0.875341	57	112	0.00307774	depscore,hads_depscore
Cognitive.f0228	0.0254504	-0.331764	0.740172	340	328	0.00303624	digit,sdmt
WHODAS.f2388	0.0244006	0.120453	0.904303	33	104	0.00291099	whodasp5_5
Scl90r.f2474	0.0212302	-0.173888	0.862062	239	87	0.00253276	tsclpsdi_p
Scl90r.f2471	0.0187823	-0.158349	0.874267	274	104	0.00224072	tpsychoticism_p
maristat	0.0185147	-0.151087	0.880019	166	109	0.00220881
Unnamed: 0	0.0183226	0.259811	0.795075	480	346	0.00218589
MRI.f2505	0.0180676	0.127171	0.898931	129	77	0.00215547	temporal_g
MRI.f2501	0.0177029	0.124411	0.901112	129	77	0.00211196	icv
Scl90r.f2473	0.0138985	0.113107	0.910016	239	87	0.00165809	tsclpst_p
FrSBeS.f1299	0.0128357	0.0821515	0.934609	61	139	0.0015313	disin_p,disinhibscore
FrSBeS.f1297	0.0122874	-0.0809039	0.935601	60	137	0.00146588	frsbescore,frsbetot_participant
Cognitive.f0236	0.00982716	0.12406	0.901307	335	307	0.00117238	scnt
Scl90r.f2482	0.00764983	0.0708013	0.943593	255	128	0.000912625	tparanoid_c
dbgap_id	0.0043028	0.0453464	0.96385	302	177	0.000513324
MRI.f2504	0.0035596	-0.0250711	0.980023	129	77	0.00042466	occipital_g
Scl90r.f2486	0.00233221	0.0185286	0.985228	246	87	0.000278233	tsclpsdi_c
Scl90r.f2470	0.00171549	0.0168282	0.986582	274	150	0.000204658	tparanoid_p
HDCC.f0056	0.00143593	-0.00799529	0.993633	48	87	0.000171306	momhd
HDCC.f0058	0.00143593	0.00799529	0.993633	48	87	0.000171306	dadhd
Behaviour.f0902	0	0	1	93	31	0	aggrfr

## Sheet: cons_states_2_3
var	d	t_val	p_val	#samples_st2	#samples_st3	d_normalized	var_name
Motor.f0180	1.31435	-13.1245	3.9257e-33	226	189	0.180986	miscore
Motor.f0179	1.23875	-18.2969	7.7818e-64	541	362	0.170576	motorscore,motscore
Motor.f0212	1.18641	-17.7346	8.61121e-61	549	377	0.163368	diagconf
GCI.f0863	1.08626	-7.68572	4.55264e-13	153	76	0.149577	svrtyll
Summary.f0780	1.07122	-7.87025	9.4648e-14	182	81	0.147507	dxentire
chorea.score	1.04857	-15.5266	2.29729e-48	542	363	0.144388
Motor.f0204	0.923151	-13.681	7.3947e-39	542	363	0.127118	choreatrunk,chortrnk
Motor.f2450	0.904572	-9.19636	1.66093e-18	269	159	0.12456	chorea
Cognitive.f0241	0.901073	12.777	2.97121e-34	490	341	0.124078	stroop_correct,swr_correct,swrt1
Summary.f0778	0.851337	6.2237	1.9252e-09	183	80	0.117229	impwrsex
Cognitive.f0237	0.848301	11.8253	7.3245e-30	479	327	0.116811	scnt1
Motor.f0206	0.840409	-12.4316	7.26419e-33	542	363	0.115724	chorealue,chorlue
Functional.f2453	0.824847	-8.43669	5.25618e-16	266	158	0.113581	uhdrs80
Functional.f0221	0.820913	8.30488	1.2915e-15	232	203	0.11304	indepencescale,indepscl
Motor.f0205	0.788584	-11.6639	2.21024e-29	542	363	0.108588	chorearue,chorrue
Motor.f2447	0.785529	-7.95175	1.66954e-14	269	159	0.108167	brady_tot
Functional.f0213	0.74897	10.7957	1.441e-25	501	361	0.103133	functionalscore,tfcscore
Functional.f0214	0.738198	10.6426	6.20548e-25	501	361	0.10165	fcoccupation,occupatn
Motor.f0202	0.735509	-10.8957	4.65631e-26	542	363	0.10128	choreaface,chorface
Cognitive.f0229	0.733169	10.7336	2.34129e-25	535	356	0.100957	sdmt_correct,sdmt1
SF.f0365	0.711484	-5.35916	2.21089e-07	86	124	0.0979713	vt,vt_nbs,vtsubscore
SF.f0822	0.707532	3.92372	0.000141528	72	58	0.0974272	lifting,pf03
Motor.f0208	0.696603	-10.3026	1.31025e-23	542	363	0.0959222	chorealle,chorlle
Motor.f0207	0.685405	-10.1361	6.1058e-23	542	363	0.0943803	chorearle,chorrle
Cognitive.f0245	0.683004	9.48264	2.76231e-20	477	323	0.0940497	sit1
SF.f0363	0.667883	-5.14756	6.07477e-07	87	124	0.0919674	bp,bp_nbs,bpsubscore
Summary.f0779	0.66618	4.86972	1.93869e-06	184	79	0.091733	impwrssj
HDCC.f0060	0.66201	-4.65087	6.19742e-06	103	88	0.0911587	ccmtr,motor
Cognitive.f0255	0.656196	8.2211	1.065e-15	344	320	0.0903581	verflt
Functional.f1246	0.65406	6.87525	2.08079e-11	279	172	0.090064	employmentaccu,emplusl,uhdrs43
asfascore	0.646771	5.17931	4.34008e-07	227	47	0.0890604
MHx.f0107	0.641447	3.43419	0.000812603	76	48	0.0883273	druguse,hxdrugab
PBAs.f0344	0.636649	-2.89371	0.00437502	44	108	0.0876665	baspersevfre,pbas7fr
Motor.f0203	0.632932	-9.37595	5.35861e-20	542	363	0.0871548	chorbol,choreabol
SF.f0821	0.628297	3.47585	0.000695874	72	58	0.0865165	activitiesm,pf02
SF.f0368	0.627164	-4.6528	5.83829e-06	86	123	0.0863605	mh,mh_nbs,mhsubscore
SF.f0369	0.625558	4.19391	4.11793e-05	83	119	0.0861393	pcs,pcsum
SF.f0857	0.625124	2.97336	0.00372431	42	56	0.0860796	gh,gh_nbs
SF.f0366	0.620803	-4.81187	2.83742e-06	88	126	0.0854846	sf,sf_nbs,sfsubscore
MRI.f2507	0.602954	3.92694	0.000121318	124	63	0.0830267	parietal_w
SF.f0862	0.600039	2.32984	0.0226627	30	43	0.0826253	sfscore
SF.f0827	0.597228	3.31448	0.00119448	72	58	0.0822383	pf08,walkings
oculo.score	0.591761	-8.74205	1.10204e-17	542	363	0.0814855
SF.f0839	0.58266	3.27919	0.00134873	71	56	0.0802323	bp02,interferework
MHx.f0102	0.576978	3.09084	0.00247321	76	48	0.0794499	alcoholabuse,hxalcab
SF.f0850	0.568257	3.16252	0.00195354	72	58	0.078249	gh02,sick
Cognitive.f2530	0.56147	-3.24225	0.00143034	133	37	0.0773145	TA5TSES
SF.f0364	0.559668	-4.23563	3.39746e-05	88	126	0.0770663	gh,gh_nbs,ghsubscore
SF.f0826	0.553787	3.07993	0.0025346	72	58	0.0762565	pf07,walkingm
SF.f0362	0.548346	-4.13986	5.04893e-05	86	124	0.0755072	rp,rp_nbs,rpsubscore
Motor.f0186	0.546703	-8.08215	2.03386e-15	542	363	0.075281	sacvelocityver,sacvelv
Cognitive.f2525	0.545422	-3.21985	0.00153663	135	37	0.0751046	TA2T__M
SF.f0832	0.542167	3.00729	0.00318279	71	57	0.0746564	physiclimit,rp03
SF.f0828	0.536449	2.96628	0.00359744	72	58	0.073869	pf09,walkingo
Cognitive.f0233	0.531032	3.65811	0.000318325	69	152	0.0731231	verfct5
MRI.f2488	0.529209	3.39875	0.000829031	124	63	0.0728721	caudate
brady.score	0.526287	-7.78717	1.87565e-14	542	363	0.0724697
Motor.f0196	0.526287	-7.78717	1.87565e-14	542	363	0.0724697	bradkinbody,brady
FrSBeF.f1350	0.51785	-2.83145	0.00528812	53	95	0.071308	exec_c,execdysscore_f
HADS.f0384	0.515012	-3.92437	0.000111285	113	150	0.0709171	depscore,hads_depscore
SF.f0367	0.51433	-3.86309	0.000148953	88	125	0.0708232	re,re_nbs,resubscore
SF.f0837	0.512448	2.92305	0.00409985	72	58	0.070564	extent,sf01
Cognitive.f0248	0.510361	-6.29977	5.92344e-10	301	277	0.0702767	trl
Motor.f0191	0.509405	-7.53107	1.21959e-13	542	363	0.070145	prosuphandsright,prosupr
SF.f0838	0.503063	2.84531	0.00518025	71	57	0.0692718	bodypain,bp01
SF.f0823	0.491432	2.74901	0.0068424	72	58	0.0676702	climbings,pf04
Motor.f2446	0.489125	-4.90336	1.3423e-06	269	159	0.0673525	oculo
SF.f0851	0.486782	2.77125	0.00641703	72	58	0.0670299	gh03,healthy
Motor.f0184	0.485436	-7.16288	1.63883e-12	542	363	0.0668446	sacinitiationver,sacinitv
CSRI.f0464	0.482822	-2.33778	0.0213508	53	51	0.0664846	csri3
SF.f0841	0.48238	2.69604	0.00797608	71	57	0.0664238	mh01,nervous
Motor.f0209	0.473802	-7.10313	2.43062e-12	553	375	0.0652426	gait
SF.f0829	0.473592	2.58973	0.0107359	72	56	0.0652136	bathing,pf10
Functional.f0220	0.470141	4.77337	2.53273e-06	219	189	0.0647384	fiscore
PBAs.f0343	0.467573	-2.48129	0.0140929	52	115	0.0643848	baspersev,pbas7sv
Motor.f0185	0.466722	-6.89474	1.01313e-11	542	363	0.0642676	sacvelh,sacvelocityhor
Functional.f0219	0.466495	4.86147	1.64021e-06	229	200	0.0642364	fascore,functionscore
MRI.f2497	0.466098	3.04116	0.00269884	124	63	0.0641816	crbrwm
finger.score	0.462995	-6.83002	1.55964e-11	542	362	0.0637544
HDCC.f0063	0.462152	-2.45525	0.0156593	51	60	0.0636383	ccdepage,depressage
Motor.f0190	0.460352	-6.79208	2.00429e-11	542	362	0.0633904	fingertapsleft,fingtapl
Motor.f0192	0.459082	-6.7807	2.15901e-11	542	363	0.0632157	prosuphandsleft,prosupl
SF.f0849	0.456289	2.57362	0.0112033	72	58	0.062831	interferesocial,sf02
Functional.f1273	0.453199	4.67863	3.82817e-06	279	172	0.0624055	fcinfosource,tfcsrc,uhdrs75
HDCC.f0072	0.452521	-3.12782	0.00201214	114	97	0.0623121	ccpsy,psychosis
Cognitive.f0249	0.452087	-5.0633	5.76938e-07	251	260	0.0622523	traila_time,trla1
PBAs.f0613	0.451129	-2.04796	0.0426415	44	84	0.0621205	basobscompworst,pbas8wo
Summary.f0777	0.448907	-3.26655	0.00123388	183	81	0.0618145	visitprp
SF.f0842	0.446359	2.48541	0.0142505	71	57	0.0614637	dumps,mh02
MRI.f2489	0.444609	2.87468	0.00451838	124	63	0.0612227	putamen
MRI.f2506	0.440844	2.89044	0.00430721	124	63	0.0607042	frontal_w
Motor.f2449	0.438814	-4.49318	9.05676e-06	268	159	0.0604247	dystonia
Cognitive.f0252	0.429081	-4.71257	3.16727e-06	249	258	0.0590844	trailb_time,trlb1
SF.f0833	0.427352	2.38699	0.0184619	72	57	0.0588463	physicdiff,rp04
Functional.f0215	0.418393	6.18211	9.59319e-10	536	363	0.0576127	fcfinances,finances,finances_tfc
SF.f0820	0.41409	2.3306	0.0213382	72	58	0.0570202	activitiesv,pf01
Motor.f0183	0.409748	-6.04479	2.18666e-09	542	363	0.0564223	sacinith,sacinitiationhor
SF.f0361	0.401946	-2.97365	0.00328688	88	124	0.0553479	pf,pf_nbs,pfsubscore
SF.f0830	0.400184	2.23876	0.0269124	72	57	0.0551054	physiccut,rp01
dystonia.score	0.397759	-5.88458	5.62582e-09	539	363	0.0547714
Cognitive.f0247	0.393699	-2.48982	0.0135212	73	149	0.0542124	sit3
Cognitive.f0254	0.392445	-2.26419	0.0247687	70	110	0.0540397	trialb_error,trlb3
Motor.f0210	0.389905	-5.75748	1.17127e-08	540	361	0.0536899	tandem,tandemwalk
Motor.f0189	0.387454	-5.71723	1.47096e-08	542	363	0.0533524	fingertapsright,fingtapr
Motor.f0187	0.381442	-5.65469	2.09505e-08	542	362	0.0525245	dysarth,dysarthria
HDCC.f0081	0.378451	2.52112	0.0128974	58	75	0.0521127	raterestimate,sxest
Motor.f0182	0.374721	-5.53726	4.02886e-08	542	363	0.0515991	ocularv,ocupursuitver
MRI.f2493	0.374575	2.43345	0.0159063	124	63	0.051579	globus
SF.f0836	0.373793	2.08328	0.0392316	72	57	0.0514712	emotioncare,re03
SF.f0844	0.37124	2.25578	0.02555	86	64	0.0511197	energy,energy_sf36,vt02
Motor.f0200	0.369055	-5.47833	5.57076e-08	541	363	0.0508189	dystrle,maxdysrle
SF.f0818	0.366483	2.24041	0.0265338	87	65	0.0504647	general,general_sf36,gh01
CSRI.f0482	0.361073	1.82073	0.0715793	53	51	0.0497198	csri8
SF.f0834	0.360775	2.01197	0.0463388	72	57	0.0496787	emotioncut,re01
SF.f0824	0.357327	1.98892	0.0488421	72	58	0.0492039	climbingo,pf05
MRI.f2509	0.356171	2.2927	0.0229904	124	63	0.0490447	temporal_w
Cognitive.f2532	0.355139	1.88963	0.0607625	116	34	0.0489026	TA5TSE_RECIP
Motor.f0188	0.352484	-5.21309	2.30335e-07	542	362	0.048537	tongue,tonprotrusion
Enrollment.f0093	0.351164	-2.64559	0.00870064	162	77	0.0483552	rfstdy
FrSBeF.f1347	0.347956	-1.90943	0.0582383	50	93	0.0479135	frsbescore_f,frsbetot_companion
Behaviour.f0920	0.347163	-2.37808	0.018313	156	53	0.0478044	irritrfr
MRI.f2510	0.346368	2.25317	0.0254227	124	63	0.0476949	icv_gw
Motor.f2448	0.33907	-3.41278	0.000704688	269	158	0.0466899	rigidity
MRI.f2498	0.338933	-2.15518	0.0324403	124	63	0.0466711	csf
WHODAS.f2517	0.337228	-1.44791	0.149978	34	102	0.0464362	whodasp2_1
Cognitive.f2529	0.336156	-1.8468	0.0665354	133	37	0.0462886	TA5TSEM
Functional.f1247	0.333273	3.51138	0.000490877	279	172	0.0458917	emplany,employment,uhdrs44
WHODAS.f2384	0.33291	1.83967	0.0680303	34	102	0.0458417	whodasp5_1
Scl90r.f2476	0.324401	-2.81575	0.00514935	236	107	0.04467	tobsess_c
Medical.f0141	0.321875	-1.79378	0.0740818	76	171	0.0443222	drugab
SF.f0861	0.319371	1.48295	0.141544	40	53	0.0439773	mh,mh_nbs
SF.f0858	0.319317	1.44787	0.151016	41	54	0.0439699	vt,vt_nbs
PBAs.f0359	0.318864	1.67076	0.0981673	35	59	0.0439076	bashousehold,pbahshd
Cognitive.f0253	0.316602	1.12721	0.2617	31	103	0.0435962	trlb2
PBAs.f0609	0.313565	-1.6387	0.103771	44	84	0.0431779	basirritworst,pbas4wo
SF.f0845	0.311218	1.72875	0.086323	70	57	0.0428548	downheart,mh04
Motor.f0194	0.310322	-4.57861	5.33725e-06	542	362	0.0427314	rigarmr,rigarmsright
HDCC.f0082	0.309857	-1.67206	0.097075	50	74	0.0426673	sxrater
Behaviour.f0919	0.308133	-1.99219	0.0476646	156	53	0.04243	deprrfr
MRI.f2491	0.307106	1.95206	0.0524399	124	63	0.0422885	thalamus
HDCC.f0062	0.305114	-2.1495	0.032814	108	91	0.0420142	ccdep,depression
Functional.f1248	0.303954	2.76715	0.00600725	240	61	0.0418545	uhdrs45,volunt,volunteer
FrSBeS.f1298	0.303479	1.94199	0.0536169	63	129	0.0417891	apathy_p,apathyscore
PBAs.f0610	0.298224	-1.55049	0.123532	44	84	0.0410655	basbehworst,pbas5wo
FrSBeF.f1349	0.295276	-1.68442	0.094281	51	94	0.0406595	disin_c,disinhibscore_f
Motor.f0201	0.292913	-4.33362	1.63162e-05	541	363	0.0403341	dystlle,maxdyslle
Behaviour.f0895	0.291294	-1.92071	0.0561041	160	55	0.0401112	deprsv
SF.f0848	0.284688	1.58502	0.11547	71	57	0.0392015	tired,vt04
Cognitive.f0256	0.272613	3.19739	0.00145558	430	208	0.0375389	verflt05
rigidity.score	0.27227	-4.01671	6.39307e-05	542	362	0.0374916
MRI.f2494	0.271666	1.72069	0.0869786	124	63	0.0374084	crblgm
SF.f0831	0.267493	1.49162	0.138298	72	56	0.0368338	physicacc,rp02
MHx.f0103	0.267124	1.58217	0.115689	99	55	0.036783	hxtobab,smoking,smoking_hx
PBAs.f0327	0.265726	-1.21883	0.225033	35	102	0.0365905	irascore
MRI.f2492	0.265508	1.72563	0.0860836	124	63	0.0365605	accumbens
Cognitive.f0236	0.265396	3.1504	0.00170395	344	320	0.0365451	scnt
Behaviour.f0915	0.265163	-1.75256	0.0811161	160	55	0.0365129	apathsv
SF.f0854	0.264701	1.2356	0.219685	42	54	0.0364494	pf,pf_nbs
Cognitive.f1134	0.264173	1.68075	0.0941749	181	50	0.0363766	emo_negative_numbercorrect,NEGSUM_STATIC
Behaviour.f0901	0.263077	-1.83803	0.0674514	160	55	0.0362257	suicsv
HDCC.f0080	0.262941	-1.3954	0.165608	51	65	0.0362069	hddiagn,hddiagnosed
PBAs.f0615	0.262542	-1.11243	0.268071	44	84	0.036152	bashallworst,pbas10wo
PBAs.f0330	0.260481	-1.1428	0.255143	35	102	0.0358683	exfscore
SF.f0835	0.260212	1.45979	0.146816	72	57	0.0358311	emotionacc,re02
Functional.f0216	0.258768	3.50456	0.000484473	468	285	0.0356324	chores,fcdomestic
Motor.f0197	0.255513	-3.78157	0.000166106	541	363	0.0351841	dysttrnk,maxdystrunk
Motor.f0181	0.250262	-3.69289	0.00023503	542	363	0.0344611	ocularh,ocupursuithor
Behaviour.f0909	0.250144	1.50535	0.133737	157	55	0.0344449	compulsv
Cognitive.f0244	0.249699	3.03269	0.0025186	344	320	0.0343835	sit
HDCC.f0058	0.249207	1.60167	0.111189	79	84	0.0343158	dadhd
HDCC.f0056	0.249207	-1.60167	0.111189	79	84	0.0343158	momhd
HADS.f0387	0.24885	-1.77182	0.0777549	83	148	0.0342667	inwardirrscore,inwscore
MRI.f2508	0.247192	1.60793	0.109555	124	63	0.0340384	occipital_w
PBAs.f0611	0.245257	-1.25454	0.211967	44	84	0.0337719	basapathworst,pbas6wo
SF.f0825	0.241667	1.35735	0.17706	72	58	0.0332775	bending,pf06
Behaviour.f0918	0.240959	-1.56022	0.120236	156	53	0.0331801	deprexam
Behaviour.f0905	0.240724	-1.55705	0.120951	159	55	0.0331477	irritsv
SF.f0859	0.240302	1.1603	0.248804	42	56	0.0330896	sf,sf_nbs
Cognitive.f0239	0.240104	-1.59505	0.112099	75	153	0.0330623	scnt3
Cognitive.f0242	0.238169	-1.41807	0.157554	74	153	0.0327959	swrt2
HADS.f0386	0.237373	-1.69504	0.091427	83	148	0.0326863	outscore,outwardirrscore
SF.f0847	0.236682	1.32009	0.189236	71	55	0.0325911	happy,mh05
Functional.f1252	0.235323	2.48454	0.0133354	279	172	0.0324039	children,children_function,supchild,uhdrs49
Motor.f0199	0.23486	-3.47263	0.000539942	539	363	0.0323402	dystlue,maxdyslue
Scl90r.f2485	0.230429	-1.75584	0.0802363	193	82	0.0317301	tsclpst_c
SF.f0855	0.227335	1.05745	0.293045	41	54	0.0313041	rp,rp_nbs
Cognitive.f0231	0.225945	-1.8643	0.063571	74	155	0.0311127	verfct
Enrollment.f0101	0.225534	1.03111	0.305054	51	48	0.0310561
Cognitive.f0257	0.224543	-1.27854	0.202411	74	147	0.0309196	verflt06
Scl90r.f2477	0.22433	-1.88337	0.06054	233	95	0.0308903	tsensitiv_c
WHODAS.f2514	0.222905	1.24338	0.215917	33	102	0.030694	whodasp1_4
SF.f0843	0.22276	1.25076	0.213341	71	57	0.030674	calm,mh03
MRI.f2505	0.221707	1.42404	0.156119	124	63	0.030529	temporal_g
CSRI.f0547	0.220978	-1.02987	0.305531	53	50	0.0304286	csri32
SF.f0370	0.220439	1.50663	0.133484	83	119	0.0303545	mcs,mcsum
Behaviour.f0914	0.219156	-1.40966	0.160106	160	54	0.0301778	apathfr
HDCC.f0070	0.215181	-1.51082	0.132413	105	97	0.0296304	ccpob,obsessive
Behaviour.f0894	0.21494	-1.39669	0.163959	160	55	0.0295973	deprfr
Cognitive.f0240	0.214697	2.79331	0.0053501	403	349	0.0295637	stroop,swrt
HDCC.f0061	0.213512	-1.24982	0.213496	61	78	0.0294005	ccmtrage,motorage
Behaviour.f0917	0.212636	-1.70744	0.0892317	156	54	0.02928	dement
Motor.f0198	0.211672	-3.13184	0.00179315	541	363	0.0291473	dystrue,maxdysrue
SF.f0860	0.211599	0.994446	0.322532	42	55	0.0291372	re,re_nbs
SF.f0853	0.208679	1.19031	0.236126	72	58	0.0287351	excellent,gh05
SF.f0840	0.208066	1.16517	0.24617	71	56	0.0286507	life,vt01
Motor.f0193	0.206732	-3.10044	0.00199057	554	377	0.028467	luria
SF.f0846	0.205757	1.14458	0.25457	71	56	0.0283328	vt03,wornout
Behaviour.f0903	0.205054	-1.37889	0.169375	160	55	0.0282359	aggrsv
Behaviour.f0889	0.202257	-1.31571	0.189685	160	55	0.0278509	biscore
SF.f0819	0.201626	-1.13625	0.257974	72	58	0.0277639	compared,ht
PBAs.f0329	0.199186	-0.876339	0.382403	35	102	0.0274279	aptscore
HADS.f0385	0.197978	-1.58339	0.114543	113	150	0.0272616	irrscore
SF.f0856	0.197536	0.944248	0.34749	41	54	0.0272007	bp,bp_nbs
scanner_ext	0.194486	1.12906	0.26086	80	58	0.0267808
PBAs.f0349	0.194482	-1.12622	0.261442	82	117	0.0267802	bashall,pbas10sv
PBAs.f0607	0.193269	-1.0031	0.317735	44	84	0.0266131	bassuicworst,pbas2wo
MRI.f2501	0.192988	1.24282	0.215509	124	63	0.0265744	icv
HDCC.f0068	0.190883	-1.3421	0.181094	105	96	0.0262846	apathy,ccapt
PBAs.f0326	0.190676	-0.861081	0.39072	35	102	0.0262561	depscore
CSRI.f0458	0.189713	-0.96233	0.33816	53	51	0.0261235	csri1
CSRI.f0545	0.188557	-0.959554	0.339549	53	51	0.0259642	csri31
Functional.f1271	0.182378	1.87743	0.0611071	279	172	0.0251134	fasrc,funcassfrom,uhdrs68
Enrollment.f0096	0.182235	-0.969848	0.334534	51	48	0.0250938
Behaviour.f0900	0.181021	-1.23146	0.219508	160	55	0.0249266	suicfr
Cognitive.f0238	0.17975	1.41346	0.158896	75	153	0.0247516	scnt2
Cognitive.f0228	0.179749	2.24023	0.0253946	356	334	0.0247515	digit,sdmt
Functional.f0217	0.179103	2.44254	0.0148133	468	286	0.0246625	adl,fcadl
CSRI.f0541	0.178764	0.980769	0.329027	53	51	0.0246158	csri29
CSRI.f0473	0.178764	0.980769	0.329027	53	51	0.0246158	csri6
CSRI.f0589	0.178764	0.971014	0.333861	53	50	0.0246158	csri53
CSRI.f0506	0.178764	0.980769	0.329027	53	51	0.0246158	csri16
Cognitive.f0250	0.178461	0.636078	0.525827	31	103	0.0245741	trla2
Medical.f0135	0.177966	1.28638	0.19954	77	167	0.0245059	alcab
PBAs.f0332	0.177728	-1.17745	0.240435	82	117	0.0244731	basdeprfre,pbas1fr
MRI.f2500	0.175936	-1.12926	0.260249	124	63	0.0242264	other
PBAs.f0355	0.175537	-1.01651	0.310632	82	117	0.0241715	bashallfre,pbas10fr
PBAs.f0346	0.174779	-1.08656	0.278678	66	117	0.0240671	basobscompfre,pbas8fr
PBAs.f0608	0.174566	0.898385	0.370694	44	84	0.0240378	basanxworst,pbas3wo
PBAs.f0342	0.173614	-1.16324	0.246139	82	117	0.0239066	basapathfre,pbas6fr
Scl90r.f2475	0.172148	-1.39306	0.164552	233	95	0.0237048	tsomatiz_c
PBAs.f0345	0.172112	-1.0579	0.291513	66	117	0.0236998	basobscomp,pbas8sv
Motor.f0195	0.171243	-2.52595	0.0117086	542	362	0.0235802	rigarml,rigarmsleft
Functional.f1250	0.169077	-1.01342	0.311677	240	61	0.0232819	groceries,grocery,uhdrs47
HDCC.f0066	0.168815	-1.18638	0.236879	105	97	0.0232458	ccvab,violent
HDCC.f0075	0.167114	-1.17517	0.241326	105	97	0.0230115	cccog,dementia
Behaviour.f0904	0.1657	-1.05013	0.294852	159	55	0.0228168	irritfr
MRI.f2504	0.163422	1.05883	0.291059	124	63	0.0225032	occipital_g
Cognitive.f0246	0.16316	-0.957966	0.339131	73	149	0.0224671	sit2
PBAs.f0328	0.161112	-0.623007	0.534331	35	102	0.0221851	psyscore
Functional.f1254	0.15955	1.22808	0.220383	240	61	0.02197	houeswork,housewrk,uhdrs51
Medical.f0136	0.15865	-1.08109	0.280993	87	110	0.0218461	alcunits
Cognitive.f0258	0.155039	-0.99086	0.322847	74	147	0.0213488	verflt07
CSRI.f0461	0.153352	0.787464	0.432836	53	51	0.0211166	csri2
PBAs.f0335	0.153155	1.04539	0.297125	82	117	0.0210895	basanx,pbas3sv
HDCC.f0086	0.151194	0.853735	0.394834	56	75	0.0208194	majorsymptomrater,sxraterm
CSRI.f0539	0.150896	0.787464	0.432836	53	51	0.0207784	csri28
CSRI.f0479	0.150896	0.787464	0.432836	53	51	0.0207784	csri7
CSRI.f0536	0.150896	0.787464	0.432836	53	51	0.0207784	csri26
Behaviour.f0908	0.150414	0.936158	0.350267	157	55	0.020712	compulfr
HDCC.f0078	0.149915	-0.796714	0.427274	52	64	0.0206432	sxsubj,symptomssubject
PBAs.f0338	0.147768	-1.00868	0.314371	81	117	0.0203477	basirritfre,pbas4fr
MRI.f2490	0.14469	-0.947484	0.344628	124	63	0.0199238	hippocampus
PBAs.f0340	0.144095	-0.969338	0.333565	82	117	0.0198419	basbehfre,pbas5fr
HDCC.f0079	0.143429	-0.693437	0.489675	42	58	0.0197502	sxfam,symptomsfamily
WHODAS.f2374	0.140802	-0.626374	0.532151	33	101	0.0193884	whodasp2_5
PBAs.f0339	0.139664	-0.944048	0.346301	82	117	0.0192318	basbeh,pbas5sv
Scl90r.f2472	0.13925	1.11288	0.266663	198	100	0.0191747	tsclgsi_p
PBAs.f0333	0.139194	-0.945935	0.345341	82	117	0.019167	bassuic,pbas2sv
Functional.f1253	0.138074	1.44854	0.148164	279	172	0.0190128	automobile,drive,uhdrs50
FrSBeS.f1297	0.13526	0.841368	0.401217	62	127	0.0186253	frsbescore,frsbetot_participant
PBAs.f0337	0.134776	-0.927755	0.35467	82	117	0.0185587	basirrit,pbas4sv
WHODAS.f2375	0.132408	0.759991	0.448595	34	102	0.0182326	whodasp3_1
MRI.f2496	0.131554	0.850945	0.3959	124	63	0.018115	crbrgm
PBAs.f0341	0.125745	-0.846201	0.398467	82	117	0.0173151	basapath,pbas6sv
WHODAS.f2380	0.124238	-0.547671	0.584829	34	102	0.0171076	whodasp4_2
CSRI.f0470	0.124107	-0.614925	0.539974	53	51	0.0170896	csri5
WHODAS.f2512	0.121756	-0.536521	0.592815	30	70	0.0167658	whodasp1_2
PBAs.f0336	0.117055	0.806193	0.421104	82	117	0.0161185	basanxfre,pbas3fr
Scl90r.f2463	0.116673	-1.03979	0.299128	249	117	0.0160659	tsomatiz_p
Cognitive.f0243	0.116251	0.828432	0.408304	74	153	0.0160078	swrt3
Scl90r.f2468	0.112941	-1.08158	0.280119	238	147	0.015552	thostility_p
Functional.f1265	0.112102	1.01166	0.312378	287	76	0.0154365	uhdrs62,walkhelp
WHODAS.f2392	0.111527	-0.534038	0.594214	34	100	0.0153573	whodasp6_1
Medical.f0137	0.107508	-0.76889	0.442702	76	170	0.0148039	tobab
Cognitive.f1214	0.107226	-0.888692	0.374855	204	109	0.014765	smell_pct,upsitresponses
CSRI.f0485	0.104579	0.538638	0.59131	53	51	0.0144005	csri9
Behaviour.f0906	0.104546	-0.673089	0.50162	160	55	0.0143959	obsessfr
Functional.f2454	0.10322	-0.767146	0.443829	102	117	0.0142134	uhdrs81
Cognitive.f0230	0.102129	-0.733869	0.463786	75	154	0.0140632	sdmt2
FrSBeS.f1300	0.101904	0.644639	0.519935	64	129	0.0140322	exec_p,execdysscore
Functional.f1249	0.101423	1.09892	0.27232	325	187	0.0139659	fafinan,finances,finances_function,uhdrs46
Cognitive.f0235	0.100362	-0.660854	0.509401	69	152	0.0138199	verfct7
Scl90r.f2480	0.0962039	-0.829885	0.407185	230	113	0.0132473	thostility_c
Scl90r.f2486	0.0957862	0.761091	0.447163	228	94	0.0131898	tsclpsdi_c
Cognitive.f0234	0.0951457	-0.636848	0.524889	69	152	0.0131016	verfct6
HDCC.f0057	0.0948081	-0.45477	0.650382	40	51	0.0130551	momagesx
PBAs.f0358	0.0939507	0.651607	0.515418	82	116	0.012937	basrelative,pbainfo
HDCC.f0065	0.0908921	-0.419399	0.676021	44	40	0.0125158	ccirbage,irritage
Behaviour.f0902	0.0874585	-0.570716	0.568794	160	55	0.012043	aggrfr
WHODAS.f2396	0.087237	0.419074	0.675838	34	101	0.0120125	whodasp6_5
Behaviour.f0888	0.0871447	-0.490402	0.624547	113	43	0.0119998	behscore
SF.f0852	0.0869344	0.495462	0.621124	72	58	0.0119709	gh04,worse
PBAs.f0357	0.0848773	-0.553549	0.580515	82	117	0.0116876	basorientfre,pbas11fr
Functional.f1256	0.0840063	-0.503522	0.614968	240	61	0.0115677	prepmeal,prepmeals,uhdrs53
Functional.f1258	0.0840063	-0.503522	0.614968	240	61	0.0115677	medications,ownmeds,uhdrs55
Functional.f1267	0.0840063	-0.503522	0.614968	240	61	0.0115677	chairs,trnchair,uhdrs64
Functional.f1266	0.0840063	-0.503522	0.614968	240	61	0.0115677	comb,combhair,uhdrs63
Functional.f1264	0.0840063	-0.503522	0.614968	240	61	0.0115677	uhdrs61,walkfall,walkfalling
Functional.f1262	0.0840063	-0.503522	0.614968	240	61	0.0115677	pubtrans,transportation,uhdrs59
Functional.f1251	0.0840063	-0.503522	0.614968	240	61	0.0115677	cash,money,uhdrs48
Functional.f1263	0.0840063	-0.503522	0.614968	240	61	0.0115677	uhdrs60,walknbr,walkneighbor
Functional.f1257	0.0840063	-0.503522	0.614968	240	61	0.0115677	telephon,telephone,uhdrs54
Functional.f1259	0.0840063	-0.503522	0.614968	240	61	0.0115677	feed,feedself,uhdrs56
FrSBeF.f1348	0.0839211	-0.490035	0.624855	52	94	0.0115559	apathy_c,apathyscore_f
PBAs.f0614	0.0833186	-0.419212	0.675775	44	84	0.011473	basdelworst,pbas9wo
FrSBeS.f1299	0.082232	-0.50455	0.614463	63	128	0.0113233	disin_p,disinhibscore
Scl90r.f2467	0.0811892	0.712641	0.476531	245	116	0.0111798	tanxiety_p
PBAs.f0334	0.0805994	-0.562883	0.574155	82	117	0.0110985	bassuicfre,pbas2fr
WHODAS.f2376	0.0799124	0.395962	0.692762	34	102	0.0110039	whodasp3_2
Scl90r.f2479	0.0789485	-0.641607	0.521586	229	94	0.0108712	tanxiety_c
PBAs.f0356	0.0779726	0.570803	0.568784	82	117	0.0107368	basorient,pbas11sv
Functional.f1260	0.0768204	-0.514072	0.607516	287	76	0.0105782	dress,uhdrs57
Functional.f1268	0.0768204	-0.514072	0.607516	287	76	0.0105782	bed,uhdrs65
Functional.f1255	0.0768204	-0.514072	0.607516	287	76	0.0105782	laundry,uhdrs52
Functional.f1261	0.0768204	-0.514072	0.607516	287	76	0.0105782	bathe,uhdrs58
Functional.f1269	0.0768204	-0.514072	0.607516	287	76	0.0105782	toilet,uhdrs66
Functional.f1270	0.0768204	-0.514072	0.607516	287	76	0.0105782	carehome,uhdrs67
MRI.f2487	0.0752045	0.485309	0.628032	124	63	0.0103557	scan_id
BDI.f2462	0.073297	-0.571839	0.567859	222	80	0.010093	bdiscore,bditotal
Behaviour.f0907	0.0725049	-0.466349	0.641445	159	55	0.00998393	obsesssv
Scl90r.f2481	0.0715157	-0.586536	0.557925	230	95	0.00984772	tphobic_c
PBAs.f0606	0.0712782	0.374924	0.708347	44	84	0.00981501	basdeprworst,pbas1wo
Scl90r.f2483	0.0709586	0.568231	0.570276	227	95	0.009771	tpsychoticism_c
Scl90r.f2464	0.0690736	-0.656948	0.5116	253	141	0.00951143	tobsess_p
WHODAS.f2511	0.0685569	-0.337031	0.736621	34	102	0.00944028	whodasp1_1
MRI.f2502	0.0683963	0.443684	0.65779	124	63	0.00941818	frontal_g
Cognitive.f0222	0.0671116	-0.524978	0.600109	75	155	0.00924126	gen1
PBAs.f0348	0.0644041	-0.410352	0.681994	82	117	0.00886844	basdelfre,pbas9fr
HDCC.f0083	0.0610725	-0.316119	0.752495	44	71	0.00840968	sxestcfd
Behaviour.f0896	0.0603563	0.334511	0.738446	114	43	0.00831106	guiltfr
Scl90r.f2478	0.0552004	-0.440942	0.65956	224	90	0.0076011	tdepress_c
MRI.f2503	0.0537549	0.347745	0.728427	124	63	0.00740204	parietal_g
HDCC.f0084	0.0514268	0.270572	0.78721	52	64	0.00708146	majorsymptomsubject,sxsubjm
Functional.f2455	0.0511189	-0.374808	0.708171	101	117	0.00703907	uhdrs82
WHODAS.f2379	0.0489675	0.269181	0.788204	34	102	0.00674282	whodasp4_1
Functional.f2452	0.0482971	-0.442185	0.658606	261	122	0.0066505	uhdrs76
MRI.f2495	0.0450964	0.289938	0.772188	124	63	0.00620978	crblwm
Behaviour.f0921	0.0449115	-0.287212	0.774232	158	55	0.00618432	isobt
Behaviour.f0911	0.0442091	0.27442	0.784028	160	55	0.00608759	delussv
PBAs.f0331	0.0417343	-0.285403	0.775635	82	117	0.00574681	basdepr,pbas1sv
HDCC.f0064	0.0408112	-0.287965	0.773672	105	97	0.0056197	ccirb,irritability
Cognitive.f2459	0.0334807	0.183533	0.854591	140	38	0.00461029	anarterr
Behaviour.f0899	0.0333111	-0.216509	0.828798	160	55	0.00458693	anxisv
Scl90r.f2466	0.0329664	-0.291516	0.770826	243	115	0.00453948	tdepress_p
Scl90r.f2474	0.0299411	0.23831	0.811812	190	96	0.00412289	tsclpsdi_p
Cognitive.f0251	0.0274706	0.179413	0.857816	70	111	0.0037827	triala_error,trla3
Scl90r.f2482	0.0265934	-0.232896	0.815979	234	115	0.00366191	tparanoid_c
MRI.f2499	0.0260096	-0.170186	0.86505	124	63	0.00358152	vb
Behaviour.f0898	0.0219364	0.139211	0.889415	160	55	0.00302064	anxifr
PBAs.f0347	0.020527	0.139657	0.889073	82	117	0.00282657	basdel,pbas9sv
WHODAS.f2401	0.0202343	0.0986793	0.921544	33	100	0.00278626	whodasp_total12
HDCC.f0085	0.0162677	0.0775737	0.938329	42	56	0.00224006	majorsymptomfamily,sxfamm
Scl90r.f2473	0.0145762	-0.116897	0.907024	190	96	0.00200714	tsclpst_p
Scl90r.f2484	0.0139592	0.106044	0.915625	195	83	0.00192218	tsclgsi_c
motor_examiner_ext	0.0139236	0.137451	0.890741	265	154	0.00191728
Behaviour.f0910	0.0128591	-0.0858561	0.931661	160	55	0.00177069	delusfr
Behaviour.f0897	0.0122201	0.068374	0.945576	114	43	0.00168271	guiltsv
Scl90r.f2470	0.011998	0.115893	0.907795	252	149	0.00165213	tparanoid_p
PBAs.f0616	0.0101405	0.0545958	0.956547	44	84	0.00139634	basorientworst,pbas11wo
HADS.f0383	0.00906023	0.0722352	0.94247	113	149	0.00124759	anxscore
Enrollment.f0095	0.00864184	0.0428751	0.965889	51	48	0.00118998	fhx
Motor.f0211	0.00824002	0.121406	0.903396	542	362	0.00113465	retpulltest,retropls
Scl90r.f2465	0.00820501	0.0728579	0.941959	249	117	0.00112983	tsensitiv_p
CSRI.f0549	0.0081422	-0.0412085	0.967211	53	50	0.00112118	csri33
CSRI.f0577	0.0081422	-0.0412085	0.967211	53	50	0.00112118	csri47
Scl90r.f2471	0.00454833	0.0403354	0.967848	244	118	0.000626305	tpsychoticism_p
Scl90r.f2469	0.00218603	-0.0195485	0.984414	246	119	0.000301016	tphobic_p

## Sheet: cons_states_3_4
var	d	t_val	p_val	#samples_st3	#samples_st4	d_normalized	var_name
Motor.f0179	1.70882	-17.4049	2.01371e-51	238	182	0.668318	motorscore,motscore
Motor.f0180	1.68723	-13.1398	2.92704e-30	125	124	0.659877	miscore
Motor.f2450	1.53098	-9.23165	2.71691e-16	94	55	0.598765	chorea
Motor.f2447	1.38394	-8.32173	5.46015e-14	94	55	0.54126	brady_tot
GCI.f0863	1.2524	-5.74799	7.31617e-08	86	33	0.489813	svrtyll
chorea.score	1.23882	-12.6281	3.34021e-31	239	182	0.484502
Functional.f2453	1.20944	-7.30735	1.68136e-11	93	54	0.473013	uhdrs80
Motor.f0206	1.12208	-11.4262	1.66054e-26	239	182	0.438844	chorealue,chorlue
Motor.f0212	1.12149	-11.405	1.901e-26	239	185	0.438614	diagconf
Motor.f0205	1.10259	-11.2357	8.77942e-26	239	182	0.431224	chorearue,chorrue
Cognitive.f0237	1.0745	10.0812	3.47775e-21	192	165	0.420236	scnt1
Motor.f2446	1.0393	-6.28762	3.47766e-09	94	55	0.406471	oculo
Motor.f0202	0.97057	-9.8896	7.24053e-21	239	182	0.37959	choreaface,chorface
oculo.score	0.936382	-9.54973	1.10288e-19	239	182	0.366219
Cognitive.f0241	0.920358	8.86116	3.28626e-17	203	172	0.359952	stroop_correct,swr_correct,swrt1
Cognitive.f0229	0.871146	8.68493	9.69977e-17	227	176	0.340705	sdmt_correct,sdmt1
Motor.f0204	0.866409	-8.84495	2.57802e-17	239	182	0.338853	choreatrunk,chortrnk
SF.f0365	0.852282	-4.91354	2.91144e-06	35	85	0.333327	vt,vt_nbs,vtsubscore
Motor.f0207	0.844917	-8.59087	1.72173e-16	239	182	0.330447	chorearle,chorrle
Motor.f0208	0.826527	-8.40316	6.8352e-16	239	182	0.323255	chorealle,chorlle
SF.f0818	0.822359	3.67969	0.000444001	36	39	0.321624	general,general_sf36,gh01
SF.f0366	0.822204	-4.9046	3.05059e-06	35	84	0.321564	sf,sf_nbs,sfsubscore
SF.f0368	0.804045	-4.52732	1.44613e-05	34	85	0.314462	mh,mh_nbs,mhsubscore
finger.score	0.804007	-8.18063	3.41077e-15	239	182	0.314447
Cognitive.f0245	0.797643	7.44886	7.45713e-13	192	159	0.311958	sit1
Motor.f0190	0.796829	-8.10696	5.76875e-15	239	182	0.31164	fingertapsleft,fingtapl
Motor.f0192	0.764844	-7.7764	5.85022e-14	239	182	0.29913	prosuphandsleft,prosupl
Motor.f0181	0.760963	-7.77177	6.04006e-14	239	182	0.297613	ocularh,ocupursuithor
Motor.f0183	0.753566	-7.68059	1.13023e-13	239	182	0.29472	sacinith,sacinitiationhor
Motor.f0209	0.749036	-7.71749	8.47991e-14	242	187	0.292948	gait
SF.f0364	0.745037	-4.20667	5.07571e-05	35	85	0.291384	gh,gh_nbs,ghsubscore
Motor.f0210	0.732579	-7.47831	4.45174e-13	239	182	0.286512	tandem,tandemwalk
Summary.f0780	0.728808	-3.3197	0.00119384	89	33	0.285037	dxentire
SF.f0363	0.698389	-4.2114	5.0106e-05	35	84	0.27314	bp,bp_nbs,bpsubscore
SF.f0362	0.697755	-4.05676	9.0121e-05	35	84	0.272892	rp,rp_nbs,rpsubscore
Motor.f0189	0.693459	-7.06049	6.93612e-12	239	182	0.271212	fingertapsright,fingtapr
SF.f0367	0.683952	-3.86382	0.000183659	35	84	0.267494	re,re_nbs,resubscore
SF.f0844	0.683664	2.98043	0.00390812	36	39	0.267381	energy,energy_sf36,vt02
Motor.f0184	0.680971	-6.93503	1.54586e-11	239	182	0.266328	sacinitiationver,sacinitv
Motor.f0203	0.672197	-6.8512	2.62493e-11	239	182	0.262896	chorbol,choreabol
WHODAS.f2517	0.668307	-2.43518	0.0177743	30	34	0.261375	whodasp2_1
SF.f0361	0.664702	-3.72085	0.000306587	35	84	0.259965	pf,pf_nbs,pfsubscore
Motor.f0185	0.662391	-6.75402	4.81957e-11	239	182	0.259061	sacvelh,sacvelocityhor
Summary.f0779	0.646395	3.12228	0.0022492	89	33	0.252805	impwrssj
Motor.f0182	0.63969	-6.5197	2.02947e-10	239	182	0.250183	ocularv,ocupursuitver
CSRI.f0545	0.635944	-3.17494	0.00198724	60	43	0.248718	csri31
brady.score	0.634668	-6.4718	2.71604e-10	238	182	0.248219
Motor.f0196	0.634668	-6.4718	2.71604e-10	238	182	0.248219	bradkinbody,brady
Motor.f0191	0.629923	-6.41428	3.82578e-10	239	182	0.246363	prosuphandsright,prosupr
Motor.f0186	0.618059	-6.30007	7.53497e-10	239	182	0.241723	sacvelocityver,sacvelv
Motor.f0187	0.616103	-6.29874	7.59406e-10	239	182	0.240958	dysarth,dysarthria
Cognitive.f0249	0.613948	-4.43092	1.46841e-05	104	122	0.240115	traila_time,trla1
HDCC.f0062	0.584644	-3.11719	0.00229794	50	69	0.228654	ccdep,depression
Motor.f0188	0.581045	-5.94286	5.89909e-09	239	182	0.227247	tongue,tonprotrusion
Cognitive.f0243	0.58083	-2.21623	0.0283629	33	103	0.227163	swrt3
WHODAS.f2374	0.557908	-2.09065	0.0405993	31	34	0.218198	whodasp2_5
Motor.f2448	0.549784	-3.3478	0.00103461	94	55	0.215021	rigidity
HDCC.f0060	0.540664	-3.28577	0.00137936	42	66	0.211453	ccmtr,motor
Cognitive.f0239	0.520759	-2.24083	0.0266953	32	103	0.203669	scnt3
Functional.f0219	0.518236	3.93064	0.000110396	116	130	0.202682	fascore,functionscore
dystonia.score	0.511077	-5.22225	2.79311e-07	238	182	0.199882
Functional.f0214	0.508569	5.08108	5.74744e-07	216	190	0.198901	fcoccupation,occupatn
Scl90r.f2476	0.505663	2.27727	0.0248995	69	33	0.197765	tobsess_c
Functional.f0220	0.492661	3.73619	0.000233308	117	126	0.19268	fiscore
MHx.f0103	0.483078	2.18843	0.0316699	37	42	0.188932	hxtobab,smoking,smoking_hx
PBAs.f0358	0.479004	-2.42221	0.0169477	39	81	0.187338	basrelative,pbainfo
HDCC.f0066	0.469584	-2.38058	0.0189293	49	68	0.183654	ccvab,violent
Functional.f0213	0.458691	4.59568	5.77488e-06	216	190	0.179394	functionalscore,tfcscore
HDCC.f0068	0.454047	-2.35017	0.0204688	49	68	0.177578	apathy,ccapt
Motor.f0195	0.4516	-4.60799	5.40408e-06	239	182	0.176621	rigarml,rigarmsleft
HDCC.f0070	0.446739	-2.27663	0.0246749	49	67	0.17472	ccpob,obsessive
rigidity.score	0.44443	-4.53409	7.56139e-06	239	182	0.173817
Motor.f0198	0.418787	-4.27841	2.3344e-05	239	182	0.163788	dystrue,maxdysrue
Cognitive.f0230	0.402636	-1.63925	0.103473	35	103	0.157471	sdmt2
FrSBeF.f1348	0.396079	1.65707	0.102045	38	33	0.154907	apathy_c,apathyscore_f
WHODAS.f2379	0.394122	-1.48807	0.141721	31	34	0.154141	whodasp4_1
Cognitive.f0246	0.393129	-1.60745	0.110438	32	97	0.153753	sit2
Functional.f1253	0.391182	2.55673	0.0115205	96	62	0.152991	automobile,drive,uhdrs50
WHODAS.f2380	0.388097	-1.45601	0.150357	31	34	0.151785	whodasp4_2
Functional.f2455	0.38493	1.85986	0.0661722	49	43	0.150546	uhdrs82
Motor.f2449	0.384028	-2.35714	0.0197345	94	55	0.150193	dystonia
HADS.f0383	0.381074	2.01598	0.0460357	47	75	0.149038	anxscore
WHODAS.f2375	0.369871	-1.37036	0.175438	31	34	0.144657	whodasp3_1
Motor.f0194	0.367021	-3.7416	0.000208332	239	182	0.143542	rigarmr,rigarmsright
Cognitive.f0252	0.366697	-2.65046	0.00861945	102	121	0.143415	trailb_time,trlb1
Cognitive.f0256	0.365742	2.95241	0.00343141	160	111	0.143042	verflt05
Cognitive.f0242	0.353041	-1.34707	0.180231	33	103	0.138074	swrt2
CSRI.f0458	0.352999	-1.76419	0.0807844	58	43	0.138058	csri1
Motor.f0200	0.351986	-3.60105	0.000354919	239	182	0.137662	dystrle,maxdysrle
CSRI.f0539	0.35006	-1.7885	0.0766932	60	43	0.136908	csri28
Motor.f0193	0.346572	-3.56479	0.00040528	242	187	0.135544	luria
Motor.f0197	0.343672	-3.51321	0.000490915	239	182	0.13441	dysttrnk,maxdystrunk
Functional.f2454	0.342939	1.6404	0.104414	49	43	0.134124	uhdrs81
PBAs.f0347	0.340158	-1.41146	0.160742	39	81	0.133036	basdel,pbas9sv
PBAs.f0348	0.340158	-1.41146	0.160742	39	81	0.133036	basdelfre,pbas9fr
Functional.f0221	0.336558	2.65912	0.00833446	122	133	0.131628	indepencescale,indepscl
Motor.f0199	0.336119	-3.42919	0.000665518	238	182	0.131456	dystlue,maxdyslue
HDCC.f0081	0.334896	2.0061	0.0476299	35	64	0.130978	raterestimate,sxest
CSRI.f0470	0.327798	-1.69411	0.0933267	60	43	0.128202	csri5
CSRI.f0485	0.313835	-1.59093	0.11475	60	43	0.122741	csri9
Motor.f0201	0.312439	-3.19293	0.00151462	239	182	0.122195	dystlle,maxdyslle
PBAs.f0337	0.306903	1.55918	0.121632	39	81	0.12003	basirrit,pbas4sv
PBAs.f0336	0.296407	1.58927	0.114675	39	81	0.115925	basanxfre,pbas3fr
WHODAS.f2401	0.288378	-1.0884	0.280632	30	34	0.112784	whodasp_total12
Cognitive.f0248	0.282576	-2.28182	0.0233476	115	135	0.110515	trl
Functional.f1246	0.282307	1.79086	0.0752543	96	62	0.11041	employmentaccu,emplusl,uhdrs43
PBAs.f0343	0.277256	-1.2446	0.215899	33	80	0.108435	baspersev,pbas7sv
Scl90r.f2471	0.269772	-1.43364	0.154536	76	35	0.105508	tpsychoticism_p
HADS.f0387	0.258906	1.43157	0.154888	45	76	0.101258	inwardirrscore,inwscore
Cognitive.f0222	0.25757	1.01225	0.313204	35	104	0.100736	gen1
Functional.f1273	0.25595	1.59329	0.113118	96	62	0.100102	fcinfosource,tfcsrc,uhdrs75
PBAs.f0335	0.25499	1.32937	0.186292	39	81	0.0997266	basanx,pbas3sv
Medical.f0135	0.25345	1.37749	0.170345	41	116	0.0991243	alcab
Scl90r.f2470	0.253361	-1.49603	0.137051	83	50	0.0990894	tparanoid_p
PBAs.f0331	0.244148	1.24955	0.213937	39	81	0.0954863	basdepr,pbas1sv
Cognitive.f0238	0.24343	-0.991342	0.323319	32	103	0.0952053	scnt2
Motor.f0211	0.24174	-2.45962	0.0143125	239	181	0.0945446	retpulltest,retropls
Scl90r.f2464	0.239172	1.20522	0.23057	78	40	0.09354	tobsess_p
WHODAS.f2511	0.236024	0.958816	0.341317	31	34	0.092309	whodasp1_1
Functional.f1271	0.235174	-1.45027	0.149003	96	61	0.0919766	fasrc,funcassfrom,uhdrs68
FrSBeS.f1298	0.233977	1.12126	0.265195	48	43	0.0915085	apathy_p,apathyscore
CSRI.f0541	0.229012	-1.18357	0.239363	60	43	0.0895668	csri29
CSRI.f0549	0.229012	-1.18357	0.239363	60	43	0.0895668	csri33
CSRI.f0543	0.229012	-1.18357	0.239363	60	43	0.0895668	csri30
FrSBeF.f1347	0.228368	0.9506	0.345174	38	32	0.0893146	frsbescore_f,frsbetot_companion
Scl90r.f2482	0.21796	1.02812	0.306212	71	38	0.0852442	tparanoid_c
PBAs.f0342	0.217406	1.16792	0.245194	39	81	0.0850277	basapathfre,pbas6fr
Cognitive.f0257	0.214619	-0.964849	0.336483	35	92	0.0839373	verflt06
HADS.f0384	0.214528	-1.14617	0.253899	51	77	0.083902	depscore,hads_depscore
WHODAS.f2384	0.2129	-0.811886	0.419963	30	34	0.0832654	whodasp5_1
Cognitive.f0251	0.212239	1.31897	0.190133	34	70	0.0830068	triala_error,trla3
PBAs.f0341	0.21108	1.11553	0.26689	39	81	0.0825532	basapath,pbas6sv
Functional.f1249	0.2093	1.30836	0.192429	116	65	0.0818571	fafinan,finances,finances_function,uhdrs46
PBAs.f0346	0.201337	-0.960508	0.338815	36	81	0.0787429	basobscompfre,pbas8fr
Enrollment.f0093	0.198178	-1.08264	0.281212	71	47	0.0775072	rfstdy
Medical.f0136	0.196802	-1.00602	0.316595	45	68	0.0769693	alcunits
HDCC.f0080	0.192776	-0.935808	0.351905	33	58	0.0753948	hddiagn,hddiagnosed
Functional.f1247	0.190721	1.24653	0.214437	96	62	0.0745908	emplany,employment,uhdrs44
PBAs.f0333	0.18269	0.967166	0.335439	39	81	0.0714501	bassuic,pbas2sv
PBAs.f0334	0.18269	0.967166	0.335439	39	81	0.0714501	bassuicfre,pbas2fr
FrSBeF.f1350	0.179977	0.766167	0.446117	39	34	0.0703892	exec_c,execdysscore_f
PBAs.f0338	0.176183	0.866696	0.387868	39	81	0.0689051	basirritfre,pbas4fr
CSRI.f0479	0.174031	-0.88298	0.379344	60	43	0.0680637	csri7
HDCC.f0082	0.166895	-0.796877	0.427667	32	58	0.0652727	sxrater
CSRI.f0515	0.166818	-0.843148	0.401138	60	43	0.0652426	csri19
Cognitive.f0255	0.166121	1.39517	0.164039	129	161	0.0649699	verflt
HDCC.f0075	0.16237	-0.85216	0.395912	48	68	0.063503	cccog,dementia
Scl90r.f2469	0.158122	-0.807851	0.420969	75	34	0.0618414	tphobic_p
Summary.f0778	0.154981	0.73571	0.463355	88	33	0.0606132	impwrsex
WHODAS.f2396	0.149285	-0.582581	0.562288	30	34	0.0583853	whodasp6_5
SF.f0369	0.146501	0.662834	0.508763	34	83	0.0572964	pcs,pcsum
Cognitive.f0244	0.143757	1.16975	0.24307	129	161	0.0562234	sit
HADS.f0385	0.137987	0.773389	0.44074	51	77	0.0539667	irrscore
PBAs.f0340	0.135875	-0.641248	0.522605	39	81	0.0531406	basbehfre,pbas5fr
Cognitive.f0254	0.134794	-0.589621	0.556749	34	70	0.0527178	trialb_error,trlb3
Scl90r.f2480	0.134593	0.663754	0.508276	71	38	0.0526395	thostility_c
Cognitive.f0231	0.133487	-0.81063	0.418984	35	104	0.0522067	verfct
HDCC.f0061	0.12963	-0.639106	0.524215	36	66	0.0506981	ccmtrage,motorage
WHODAS.f2376	0.127743	-0.502946	0.616756	31	34	0.0499604	whodasp3_2
PBAs.f0332	0.126677	0.630692	0.529461	39	81	0.0495435	basdeprfre,pbas1fr
PBAs.f0345	0.126676	-0.623679	0.534074	36	81	0.0495429	basobscomp,pbas8sv
HDCC.f0058	0.1219	-0.573682	0.567511	35	64	0.0476752	dadhd
Functional.f0218	0.118353	1.08374	0.279229	189	161	0.046288	carelevl,fccarelevel
Scl90r.f2465	0.113123	0.542195	0.588822	75	33	0.0442425	tsensitiv_p
Medical.f0137	0.108326	0.606263	0.545221	41	117	0.0423661	tobab
WHODAS.f2392	0.103641	-0.401473	0.689452	30	34	0.0405338	whodasp6_1
CSRI.f0482	0.0903033	-0.451751	0.652417	60	43	0.0353176	csri8
Functional.f0216	0.0901175	-0.846002	0.398133	189	161	0.0352449	chores,fcdomestic
HDCC.f0086	0.0807558	-0.383576	0.702132	35	64	0.0315836	majorsymptomrater,sxraterm
Cognitive.f0236	0.080269	-0.702482	0.482946	129	161	0.0313932	scnt
WHODAS.f2514	0.0767815	-0.302233	0.763503	30	33	0.0300292	whodasp1_4
FrSBeS.f1297	0.0727369	0.340428	0.734364	47	41	0.0284474	frsbescore,frsbetot_participant
HDCC.f0064	0.0637383	-0.354668	0.723477	51	68	0.024928	ccirb,irritability
HDCC.f0056	0.0579421	0.274534	0.784258	35	64	0.0226611	momhd
Cognitive.f0247	0.0571077	-0.29283	0.77013	32	97	0.0223348	sit3
Scl90r.f2466	0.0563983	0.274784	0.783997	77	35	0.0220574	tdepress_p
CSRI.f0506	0.0561236	0.277524	0.781951	60	42	0.0219499	csri16
CSRI.f0464	0.0521104	-0.26131	0.794385	60	43	0.0203804	csri3
Medical.f0141	0.051316	0.299862	0.764679	41	118	0.0200697	drugab
Functional.f1252	0.0501981	0.311722	0.755668	96	62	0.0196325	children,children_function,supchild,uhdrs49
Functional.f0217	0.0470975	-0.440954	0.65952	189	161	0.0184198	adl,fcadl
CSRI.f0473	0.0470793	-0.236725	0.813349	60	43	0.0184127	csri6
Cognitive.f0228	0.0458223	0.382972	0.702016	132	166	0.0179211	digit,sdmt
PBAs.f0357	0.0450538	0.240612	0.810273	39	81	0.0176205	basorientfre,pbas11fr
CSRI.f0536	0.0439518	0.217979	0.827889	60	42	0.0171895	csri26
Cognitive.f0233	0.0414764	0.198679	0.842813	34	103	0.0162214	verfct5
Summary.f0777	0.0375125	-0.1833	0.854872	89	33	0.0146711	visitprp
Functional.f0215	0.0343035	0.349835	0.726638	233	188	0.0134161	fcfinances,finances,finances_tfc
PBAs.f0356	0.0321797	-0.158409	0.874405	39	81	0.0125855	basorient,pbas11sv
FrSBeS.f1299	0.0318373	-0.151415	0.879991	47	44	0.0124516	disin_p,disinhibscore
CSRI.f0461	0.0294036	0.147053	0.883383	60	43	0.0114998	csri2
HADS.f0386	0.0283825	0.150449	0.880665	45	76	0.0111004	outscore,outwardirrscore
Scl90r.f2468	0.0282466	0.154807	0.877221	79	49	0.0110472	thostility_p
Scl90r.f2463	0.0233896	0.109422	0.913075	75	33	0.00914769	tsomatiz_p
Scl90r.f2467	0.0217784	-0.104948	0.916613	76	33	0.00851753	tanxiety_p
FrSBeF.f1349	0.0210977	-0.0895177	0.928923	39	34	0.00825131	disin_c,disinhibscore_f
SF.f0370	0.020615	-0.101609	0.919244	34	83	0.00806252	mcs,mcsum
FrSBeS.f1300	0.0155736	0.0732208	0.941798	47	42	0.00609084	exec_p,execdysscore
Cognitive.f0240	0.0118426	-0.106404	0.915329	152	169	0.00463162	stroop,swrt
HDCC.f0084	0.0112913	0.0507565	0.959642	30	55	0.00441601	majorsymptomsubject,sxsubjm
Cognitive.f0234	0.0112695	-0.0571249	0.95453	34	103	0.00440749	verfct6
Functional.f2452	0.0081986	0.0424237	0.966229	87	39	0.00320647	uhdrs76
Cognitive.f0258	0.00770416	-0.0361456	0.971224	35	92	0.0030131	verflt07
Scl90r.f2472	0.00568694	-0.0260644	0.979262	64	31	0.00222416	tsclgsi_p
PBAs.f0339	0.0056821	0.0289113	0.976984	39	81	0.00222227	basbeh,pbas5sv
Cognitive.f0235	0.0016413	-0.00806348	0.993578	34	103	0.000641913	verfct7

## Sheet: cons_states_4_5
var	d	t_val	p_val	#samples_st4	#samples_st5	d_normalized	var_name
Functional.f0213	2.32658	35.1193	3.17841e-171	496	412	0.814072	functionalscore,tfcscore
Functional.f0221	1.98748	27.2551	1.65456e-114	404	355	0.695419	indepencescale,indepscl
Functional.f0214	1.93901	29.1641	2.13041e-132	496	412	0.678459	fcoccupation,occupatn
Functional.f0220	1.72158	23.4246	1.59738e-91	398	355	0.60238	fiscore
Functional.f0219	1.72081	23.3322	9.26947e-91	396	349	0.602113	fascore,functionscore
Functional.f0215	1.26132	19.4537	3.91064e-71	516	429	0.441335	fcfinances,finances,finances_tfc
Functional.f0216	1.19096	17.8654	3.4116e-61	489	398	0.416717	chores,fcdomestic
Functional.f1246	1.0108	5.13669	1.36567e-06	63	40	0.353679	employmentaccu,emplusl,uhdrs43
GCI.f0863	0.97138	-9.46982	2.48051e-19	246	156	0.339886	svrtyll
CSRI.f0767	0.907218	-5.15555	9.34635e-07	70	60	0.317436
WPAI.f0595	0.883689	4.28324	4.82435e-05	36	51	0.309203
WPAI.f0594	0.833247	-3.62984	0.000486311	36	50	0.291553	wpaiscr4
WPAI.f0600	0.833247	-3.62984	0.000486311	36	50	0.291553
Care.f0865	0.790737	-4.2662	4.05571e-05	74	45	0.276679	crgvr2
Functional.f0217	0.767388	11.5064	1.19078e-28	489	398	0.268509	adl,fcadl
Functional.f1247	0.729029	3.84089	0.000214173	63	40	0.255087	emplany,employment,uhdrs44
Care.f0864	0.728098	-3.90779	0.000156473	74	45	0.254762	crgvr1
Functional.f2453	0.724692	-3.44831	0.000842484	59	38	0.25357	uhdrs80
Motor.f2447	0.680045	-3.38207	0.0010349	58	42	0.237948	brady_tot
Care.f0868	0.664981	-3.65401	0.000387826	74	45	0.232677	crgvr5
SF.f0829	0.635228	3.50549	0.000590541	66	97	0.222266	bathing,pf10
CSRI.f0549	0.61952	-4.28993	2.81734e-05	102	94	0.21677	csri33
Summary.f0779	0.614851	6.29677	7.28579e-10	270	178	0.215137	impwrssj
Summary.f0778	0.614247	6.29076	7.52185e-10	271	179	0.214925	impwrsex
SF.f0824	0.586339	3.44965	0.000716687	66	97	0.20516	climbingo,pf05
Care.f0866	0.570772	-3.11433	0.00231858	74	45	0.199713	crgvr3
Functional.f1253	0.552728	2.89678	0.00462281	63	40	0.193399	automobile,drive,uhdrs50
SF.f0371	0.550406	-2.95628	0.0036942	47	86	0.192587
SF.f0372	0.532401	2.78158	0.00620825	47	86	0.186287
Behaviour.f0890	0.530653	-2.51222	0.0134092	40	75	0.185675	behaviour_depscore
Physio.f0322	0.520575	1.93448	0.0569841	30	44	0.182149	tug
CSRI.f0512	0.517073	-2.55584	0.0116523	53	90	0.180924	csri18
SF.f0377	0.514032	2.67348	0.00846996	46	86	0.17986
SF.f0376	0.513981	2.66763	0.00861068	46	86	0.179842
SF.f0821	0.505643	3.06545	0.00254703	66	98	0.176925	activitiesm,pf02
Motor.f0210	0.503271	-7.73453	2.64945e-14	514	435	0.176094	tandem,tandemwalk
MMSE.f0315	0.503153	2.34615	0.0209617	43	58	0.176053
Motor.f2450	0.498377	-2.45957	0.0156622	58	42	0.174382	chorea
PBAs.f0341	0.494199	-3.81802	0.000166651	101	173	0.17292	basapath,pbas6sv
SF.f0827	0.493211	2.85219	0.0049081	66	98	0.172574	pf08,walkings
Motor.f0179	0.491336	-7.5318	1.16912e-13	512	434	0.171919	motorscore,motscore
Motor.f0180	0.483144	-6.86108	1.35891e-11	435	376	0.169052	miscore
Care.f0867	0.481046	-2.58987	0.0108208	74	45	0.168318	crgvr4
Motor.f0212	0.469012	-7.10303	2.46084e-12	481	431	0.164107	diagconf
Motor.f0209	0.467297	-7.19506	1.26425e-12	518	436	0.163507	gait
MMSE.f0310	0.46635	-2.46858	0.0152786	43	58	0.163176
Care.f0877	0.460568	-2.44738	0.0158757	74	45	0.161153	crgvr14
HADS.f0384	0.442594	-3.5298	0.000488752	115	157	0.154864	depscore,hads_depscore
SF.f0375	0.437416	2.32808	0.02144	47	86	0.153052
CSRI.f0551	0.437219	-3.02393	0.00283259	102	94	0.152983	csri34
Functional.f1252	0.425461	2.21605	0.0289323	63	40	0.148869	children,children_function,supchild,uhdrs49
Enrollment.f0097	0.419108	-1.76441	0.0823615	33	34	0.146646
SF.f0822	0.419021	2.52702	0.0124679	66	97	0.146616	lifting,pf03
SF.f0826	0.415861	2.46389	0.0147953	66	97	0.14551	pf07,walkingm
PBAs.f0329	0.410304	-2.79396	0.00563813	81	155	0.143565	aptscore
SF.f0854	0.405861	2.13953	0.0341783	49	89	0.142011	pf,pf_nbs
Care.f0869	0.40154	-2.16879	0.0321223	74	45	0.140499	crgvr6
Motor.f2446	0.399742	-2.0028	0.0479609	58	42	0.13987	oculo
CSRI.f0491	0.398078	-2.15187	0.0331103	53	90	0.139287	csri11
HDCC.f0067	0.395298	-1.89219	0.0616798	49	43	0.138315	ccvabage,violentage
PBAs.f0342	0.388541	-3.05392	0.00248268	101	173	0.135951	basapathfre,pbas6fr
Behaviour.f0889	0.385331	-3.23411	0.00136122	178	114	0.134827	biscore
PBAs.f0357	0.38208	-2.72507	0.00684406	103	172	0.13369	basorientfre,pbas11fr
CSRI.f0459	0.379875	-1.55711	0.123295	32	52	0.132918	csri1a
Behaviour.f0888	0.37919	-3.06446	0.00240219	164	107	0.132679	behscore
HDCC.f0070	0.378192	-3.35306	0.000894529	195	129	0.132329	ccpob,obsessive
Motor.f0187	0.376708	-5.78894	9.62361e-09	515	435	0.13181	dysarth,dysarthria
Behaviour.f0907	0.375664	-3.19699	0.00154273	177	114	0.131445	obsesssv
CSRI.f0485	0.36661	-2.54989	0.0115524	101	94	0.128277	csri9
Cognitive.f0238	0.362649	3.63822	0.000315966	135	216	0.126891	scnt2
Enrollment.f0099	0.362227	1.41454	0.161975	33	34	0.126743
SF.f0369	0.356385	2.86747	0.00445332	110	171	0.124699	pcs,pcsum
Behaviour.f0908	0.349988	-2.96786	0.00325701	170	113	0.122461	compulfr
SF.f0828	0.348786	2.03903	0.0430925	66	96	0.12204	pf09,walkingo
Motor.f2449	0.347665	-1.7592	0.0816647	58	42	0.121648	dystonia
Summary.f0780	0.342125	-3.44273	0.00062997	271	179	0.119709	dxentire
CSSRS.f0273	0.335893	1.67425	0.0980863	34	46	0.117529	sbh3
PBAs.f0330	0.334676	-2.27467	0.0238352	81	154	0.117103	exfscore
SF.f0848	0.331873	2.00218	0.0469234	66	99	0.116123	tired,vt04
PBAs.f0343	0.33044	-2.3842	0.0178572	86	168	0.115621	baspersev,pbas7sv
MHx.f0106	0.329047	-1.51252	0.134027	41	48	0.115133	hxpacky
Motor.f0189	0.324355	-4.98493	7.36627e-07	515	436	0.113492	fingertapsright,fingtapr
SF.f0825	0.322892	2.00619	0.0465101	66	97	0.11298	bending,pf06
Medical.f0139	0.322822	1.90965	0.0578146	62	115	0.112956	cafab
PBAs.f0613	0.322597	-1.77562	0.0775234	52	126	0.112877	basobscompworst,pbas8wo
SF.f0823	0.320439	1.94082	0.0540378	66	96	0.112122	climbings,pf04
Behaviour.f0892	0.319954	-1.50819	0.134321	40	74	0.111952	behaviour_irascore
Behaviour.f0917	0.317973	-2.78813	0.00567121	166	111	0.111259	dement
CSRI.f0460	0.317598	1.65016	0.102736	32	52	0.111128	csri1b
Behaviour.f0909	0.316768	-2.67509	0.00790888	170	113	0.110837	compulsv
Motor.f0190	0.313052	-4.81212	1.73653e-06	515	436	0.109537	fingertapsleft,fingtapl
CSRI.f0545	0.31138	-2.17826	0.0305926	102	94	0.108952	csri31
SF.f0373	0.307076	1.63331	0.104823	47	85	0.107446
MMSE.f0293	0.304355	-1.60496	0.111688	43	58	0.106494
Behaviour.f0896	0.30376	-2.49503	0.0131924	164	108	0.106286	guiltfr
PBAs.f0611	0.302876	-1.80364	0.0729793	53	127	0.105976	basapathworst,pbas6wo
Motor.f2448	0.301442	-1.48591	0.140513	58	42	0.105475	rigidity
CSRI.f0537	0.300775	1.9248	0.056282	53	89	0.105241	csri27
Motor.f0202	0.297827	-4.57162	5.4807e-06	515	434	0.10421	choreaface,chorface
Cognitive.f0252	0.297594	-2.49539	0.0131436	130	159	0.104128	trailb_time,trlb1
SF.f0819	0.296126	-1.88353	0.0614204	66	98	0.103615	compared,ht
Cognitive.f0239	0.296126	2.89092	0.00408164	135	216	0.103614	scnt3
Behaviour.f0901	0.293635	-2.56779	0.0107361	178	114	0.102743	suicsv
SF.f0835	0.292349	1.78778	0.07567	66	99	0.102293	emotionacc,re02
Cognitive.f0236	0.291198	2.81657	0.00506128	194	271	0.10189	scnt
SF.f0374	0.28797	1.53988	0.126002	47	86	0.100761
Cognitive.f0255	0.287389	2.96589	0.00317407	194	271	0.100558	verflt
chorea.score	0.286377	-4.39657	1.22425e-05	515	434	0.100203
Functional.f0218	0.286167	4.29184	1.96745e-05	489	398	0.10013	carelevl,fccarelevel
SF.f0380	0.286056	-1.53055	0.128329	45	86	0.100091
Cognitive.f0251	0.278366	-1.94925	0.052537	94	128	0.0974004	triala_error,trla3
MMSE.f0319	0.275529	1.22691	0.222767	43	58	0.0964076
MMSE.f0317	0.275529	1.22691	0.222767	43	58	0.0964076
Cognitive.f0654	0.274517	-1.44626	0.150262	114	33	0.0960534	cogscore
PBAs.f0344	0.274228	-1.97257	0.0496787	84	161	0.0959524	baspersevfre,pbas7fr
Cognitive.f0240	0.269697	2.77276	0.00576261	220	290	0.094367	stroop,swrt
Behaviour.f0914	0.268275	-2.26134	0.0244817	177	114	0.0938694	apathfr
Motor.f0191	0.26664	-4.09464	4.58889e-05	515	435	0.0932972	prosuphandsright,prosupr
Motor.f0203	0.259623	-3.98711	7.20244e-05	515	435	0.0908422	chorbol,choreabol
Motor.f0204	0.258597	-3.97243	7.65345e-05	515	435	0.090483	choreatrunk,chortrnk
SF.f0839	0.257583	1.65623	0.0995981	66	99	0.0901282	bp02,interferework
PBAs.f0326	0.255281	-1.78168	0.0760984	81	155	0.0893229	depscore
oculo.score	0.25336	-3.89166	0.000106523	515	435	0.0886506
Functional.f1273	0.249427	1.20885	0.229571	63	39	0.0872744	fcinfosource,tfcsrc,uhdrs75
Behaviour.f0894	0.249345	-2.1005	0.0365482	178	114	0.0872457	deprfr
Motor.f0192	0.248942	-3.8233	0.000140276	515	435	0.0871048	prosuphandsleft,prosupl
Care.f0884	0.248222	-1.3793	0.170434	74	45	0.0868528	crgvr21
Cognitive.f0229	0.248064	3.18734	0.00150398	341	318	0.0867978	sdmt_correct,sdmt1
PBAs.f0345	0.24728	-1.85215	0.0651329	93	170	0.0865234	basobscomp,pbas8sv
CSRI.f0494	0.245278	1.59648	0.112621	53	90	0.0858229	csri12
CSRI.f0515	0.244448	-1.69654	0.0913954	101	94	0.0855324	csri19
SF.f0382	0.244174	1.30607	0.193837	46	86	0.0854363
Behaviour.f0898	0.24377	-2.05825	0.0404591	178	114	0.085295	anxifr
Care.f0872	0.243057	-1.31522	0.191007	74	45	0.0850458	crgvr9
Motor.f0188	0.242841	-3.73384	0.000199825	515	435	0.0849701	tongue,tonprotrusion
MHx.f0107	0.240328	1.64994	0.100616	104	87	0.0840908	druguse,hxdrugab
Enrollment.f0093	0.239639	2.04456	0.0416936	227	104	0.0838496	rfstdy
SF.f0856	0.239207	1.35848	0.176467	49	95	0.0836985	bp,bp_nbs
Behaviour.f0906	0.236348	-1.98379	0.0482254	177	114	0.0826981	obsessfr
Care.f0881	0.235768	-1.22642	0.222612	74	40	0.0824951	crgvr18
brady.score	0.235117	-3.61224	0.000319497	515	435	0.0822674
Motor.f0196	0.235117	-3.61224	0.000319497	515	435	0.0822674	bradkinbody,brady
MMSE.f0295	0.234904	-1.22762	0.222499	43	58	0.0821929
Care.f0878	0.234785	-1.27712	0.204087	74	45	0.0821513	crgvr15
PBAs.f0606	0.234067	1.4441	0.150458	53	128	0.0818999	basdeprworst,pbas1wo
CSSRS.f0275	0.233886	1.1658	0.247248	34	46	0.0818366	sbh4
Motor.f0208	0.23219	-3.56685	0.000379375	515	435	0.0812433	chorealle,chorlle
Cognitive.f0241	0.229277	2.84035	0.00465598	319	296	0.0802239	stroop_correct,swr_correct,swrt1
CSRI.f0503	0.228203	-1.24066	0.216806	52	90	0.0798484	csri15
Cognitive.f0246	0.227637	2.1668	0.0309548	129	208	0.0796502	sit2
SF.f0857	0.225757	1.21859	0.22508	49	91	0.0789923	gh,gh_nbs
MMSE.f0309	0.225329	-1.13501	0.259112	43	58	0.0788427
MMSE.f0296	0.22514	1.08282	0.281517	43	58	0.0787766
Cognitive.f0250	0.224737	-1.78141	0.0764514	74	117	0.0786356	trla2
Care.f0871	0.224652	-1.18545	0.238264	74	44	0.0786056	crgvr8
SF.f0363	0.223329	-1.94635	0.0525621	112	185	0.0781427	bp,bp_nbs,bpsubscore
SF.f0833	0.222795	1.38513	0.167916	66	98	0.0779559	physicdiff,rp04
Motor.f0184	0.222258	-3.41317	0.000669306	515	435	0.077768	sacinitiationver,sacinitv
HDCC.f0076	0.221222	-1.19955	0.23264	73	51	0.0774056	cccogage,dementage
MMSE.f0300	0.221177	1.04237	0.299777	43	58	0.0773898
CSRI.f0559	0.219252	-1.08373	0.280321	53	91	0.0767163	csri38
Motor.f0182	0.217629	-3.34432	0.000857165	515	435	0.0761484	ocularv,ocupursuitver
CSSRS.f0272	0.216842	-0.858293	0.393361	34	46	0.0758731	sbh2
CSSRS.f0270	0.216842	-0.858293	0.393361	34	46	0.0758731	sbh1
SF.f0842	0.216839	1.34698	0.179868	66	98	0.0758719	dumps,mh02
Motor.f0186	0.215104	-3.30333	0.000991207	515	435	0.0752649	sacvelocityver,sacvelv
Care.f0885	0.214209	-1.15391	0.250889	74	45	0.0749518	crgvr22
Motor.f0207	0.213487	-3.27966	0.00107718	515	435	0.0746992	chorearle,chorrle
HADS.f0383	0.212033	-1.6781	0.0944886	114	157	0.0741902	anxscore
Cognitive.f0233	0.211062	1.87203	0.0620556	128	216	0.0738505	verfct5
SF.f0852	0.210956	1.33078	0.185145	66	97	0.0738135	gh04,worse
HADS.f0387	0.209791	-1.57305	0.116967	98	155	0.073406	inwardirrscore,inwscore
MMSE.f0294	0.207974	-1.16345	0.247445	43	58	0.0727701
MMSE.f0314	0.207974	-1.16345	0.247445	43	58	0.0727701
PBAs.f0346	0.206887	-1.56269	0.119337	93	170	0.0723899	basobscompfre,pbas8fr
Behaviour.f0903	0.204438	-1.7222	0.0861066	177	113	0.0715329	aggrsv
HDCC.f0062	0.202173	-1.7459	0.0818008	194	124	0.0707405	ccdep,depression
HDCC.f0063	0.201868	-1.47243	0.142348	128	92	0.0706335	ccdepage,depressage
PBAs.f0356	0.199841	-1.59902	0.110974	103	172	0.0699244	basorient,pbas11sv
SF.f0861	0.199349	1.10191	0.27239	49	93	0.0697522	mh,mh_nbs
Enrollment.f0646	0.198333	1.04284	0.29933	60	51	0.0693967
Cognitive.f0228	0.198294	1.98448	0.0477854	198	272	0.0693832	digit,sdmt
Functional.f1271	0.198018	0.970956	0.33389	63	40	0.0692867	fasrc,funcassfrom,uhdrs68
CSRI.f0536	0.197756	-1.37259	0.171473	101	94	0.0691949	csri26
HADS.f0385	0.19771	-1.5549	0.121137	115	158	0.0691789	irrscore
SF.f0858	0.196409	1.06248	0.289845	49	93	0.0687237	vt,vt_nbs
Motor.f0181	0.195958	-3.01007	0.00268104	515	435	0.0685657	ocularh,ocupursuithor
Cognitive.f0244	0.19514	1.98719	0.0474906	194	271	0.0682796	sit
Motor.f0185	0.19493	-2.9939	0.00282587	515	435	0.0682059	sacvelh,sacvelocityhor
Care.f0873	0.194716	-1.02698	0.306549	74	45	0.0681312	crgvr10
Care.f0879	0.194646	-1.06106	0.290849	74	45	0.0681065	crgvr16
CSRI.f0589	0.193849	1.37789	0.16984	100	94	0.0678276	csri53
Behaviour.f0897	0.193819	-1.5735	0.116774	164	108	0.0678171	guiltsv
Care.f0874	0.192436	-1.03248	0.303977	74	45	0.0673333	crgvr11
SF.f0860	0.191899	1.07569	0.283903	49	94	0.0671456	re,re_nbs
PBAs.f0609	0.191585	1.14558	0.253508	53	127	0.0670355	basirritworst,pbas4wo
CSRI.f0524	0.189122	1.31903	0.189311	52	90	0.0661737	csri22
PBAs.f0612	0.188942	-1.00579	0.316149	40	111	0.0661107	pbas7wo
SF.f0862	0.188281	0.971583	0.333229	46	75	0.0658796	sfscore
CSRI.f0561	0.187348	-1.30079	0.194872	101	95	0.0655532	csri39
HDCC.f0069	0.187338	-1.10209	0.272313	81	61	0.0655496	apathyage,ccaptage
CSRI.f0573	0.187329	1.31366	0.19108	53	91	0.0655464	csri45
CSRI.f0467	0.187329	1.30635	0.193559	53	90	0.0655464	csri4
Behaviour.f0900	0.186974	-1.58691	0.113622	178	114	0.0654224	suicfr
PBAs.f0614	0.186845	-1.07807	0.282471	53	126	0.0653772	basdelworst,pbas9wo
Motor.f0200	0.186016	-2.85977	0.00433264	514	435	0.0650869	dystrle,maxdysrle
Behaviour.f0912	0.18546	-1.6793	0.0941739	177	114	0.0648924	hallucfr
Behaviour.f0913	0.18546	-1.6793	0.0941739	177	114	0.0648924	hallucsv
motor_examiner_ext	0.18445	0.898676	0.371074	57	41	0.0645392
Cognitive.f0249	0.181062	-1.55935	0.12	132	161	0.0633537	traila_time,trla1
HDCC.f0064	0.180951	-1.61002	0.108367	194	132	0.0633149	ccirb,irritability
SF.f0849	0.179692	1.12792	0.261009	66	99	0.0628741	interferesocial,sf02
Behaviour.f0891	0.177609	-0.858982	0.392169	40	75	0.0621454	defscore
Behaviour.f0919	0.176963	-1.44466	0.149695	165	111	0.0619194	deprrfr
Enrollment.f0647	0.176063	-0.921321	0.358918	60	51	0.0616044
Enrollment.f0645	0.176063	0.921321	0.358918	60	51	0.0616044
SF.f0836	0.175568	1.08678	0.278741	66	99	0.0614312	emotioncare,re03
Motor.f0211	0.175195	-2.68996	0.00727183	514	435	0.0613009	retpulltest,retropls
CSRI.f0509	0.173223	-0.948618	0.344438	53	90	0.0606107	csri17
Care.f0870	0.173092	-0.927355	0.355651	74	45	0.0605648	crgvr7
MMSE.f0316	0.172275	-0.875168	0.383601	43	58	0.0602789
Care.f0883	0.171722	-0.936715	0.350851	74	44	0.0600857	crgvr20
Medical.f0138	0.171542	-0.816067	0.416053	49	75	0.0600225	packy
HDCC.f0071	0.169762	-0.913725	0.36279	55	61	0.0593996	ccpobage,obsessage
Care.f0880	0.168745	-0.896286	0.371956	74	44	0.059044	crgvr17
SF.f0370	0.166867	1.3497	0.178207	110	171	0.0583867	mcs,mcsum
SF.f0831	0.166765	1.03421	0.302578	66	98	0.0583512	physicacc,rp02
Scl90r.f2470	0.164937	-0.758789	0.450181	51	32	0.0577116	tparanoid_p
Cognitive.f0243	0.16478	1.6074	0.108868	135	217	0.0576567	swrt3
Scl90r.f2468	0.164716	-0.752395	0.453995	51	32	0.057634	thostility_p
HDCC.f0066	0.164187	-1.457	0.14609	193	131	0.0574489	ccvab,violent
MMSE.f0305	0.162654	-0.851339	0.396636	43	58	0.0569125
CSRI.f0461	0.162134	-1.12888	0.26035	101	94	0.0567308	csri2
SF.f0820	0.161663	0.9931	0.322151	66	97	0.056566	activitiesv,pf01
Behaviour.f0902	0.161402	-1.35074	0.177842	177	112	0.0564744	aggrfr
CSRI.f0483	0.160992	-0.749073	0.45552	34	71	0.056331	csri8a
MMSE.f0301	0.160618	-0.819795	0.414302	43	58	0.0562004
Care.f0886	0.160312	-0.874082	0.383864	74	45	0.0560933	crgvr23
SF.f0366	0.158941	-1.37819	0.16919	112	185	0.0556136	sf,sf_nbs,sfsubscore
CSSRS.f0260	0.158889	-0.690062	0.492203	34	46	0.0555951	sid2
Cognitive.f0254	0.158113	-1.16413	0.245651	94	125	0.0553238	trialb_error,trlb3
SF.f0834	0.156987	0.98379	0.326686	66	98	0.0549298	emotioncut,re01
Cognitive.f0230	0.155111	1.451	0.147674	134	219	0.0542733	sdmt2
CSRI.f0567	0.154171	-0.762043	0.447298	53	91	0.0539444	csri42
CSRI.f0579	0.154171	-0.754783	0.451638	52	91	0.0539444	csri48
CSRI.f0553	0.152504	-1.04753	0.296164	102	93	0.0533612	csri35
SF.f0843	0.152496	-0.951352	0.342843	66	98	0.0533585	calm,mh03
Motor.f0205	0.152101	-2.33603	0.0196974	515	435	0.0532201	chorearue,chorrue
CSRI.f0555	0.151691	-1.04191	0.298749	102	94	0.0530766	csri36
MMSE.f0292	0.150927	0.720022	0.473208	43	58	0.0528095
CSRI.f0543	0.150716	1.06286	0.28916	102	95	0.0527354	csri30
CSRI.f0482	0.149034	-1.0417	0.298853	101	94	0.052147	csri8
Behaviour.f0895	0.148198	-1.23928	0.216244	178	114	0.0518547	deprsv
PBAs.f0336	0.148146	-1.16123	0.246559	103	173	0.0518362	basanxfre,pbas3fr
Summary.f0777	0.1474	-1.52906	0.126953	272	179	0.0515752	visitprp
HADS.f0386	0.147324	-1.09464	0.274724	99	154	0.0515488	outscore,outwardirrscore
Cognitive.f0234	0.147215	1.39569	0.163712	128	217	0.0515105	verfct6
PBAs.f0334	0.14667	-1.11131	0.267411	103	173	0.0513198	bassuicfre,pbas2fr
Motor.f0206	0.144984	-2.22665	0.0262048	515	435	0.0507297	chorealue,chorlue
HDCC.f0079	0.144699	-1.13358	0.257997	166	100	0.0506302	sxfam,symptomsfamily
HDCC.f0058	0.142207	-1.19294	0.233843	188	112	0.0497582	dadhd
Enrollment.f0098	0.141417	-0.955789	0.34049	93	85	0.0494818
HDCC.f0077	0.139933	-0.875769	0.382356	62	115	0.0489627	hxsid
SF.f0832	0.139886	0.874347	0.383232	66	97	0.048946	physiclimit,rp03
PBAs.f0331	0.139864	-1.10902	0.268395	103	173	0.0489385	basdepr,pbas1sv
Behaviour.f0916	0.139592	-1.22401	0.221997	166	111	0.0488433	confus
SF.f0838	0.139503	0.895105	0.372051	66	99	0.0488122	bodypain,bp01
Cognitive.f0242	0.138911	1.38712	0.166289	135	217	0.048605	swrt2
Medical.f0136	0.13861	1.08138	0.280764	88	125	0.0484995	alcunits
HDCC.f0065	0.138084	-0.886546	0.376606	95	73	0.0483157	ccirbage,irritage
HDCC.f0083	0.137108	1.04795	0.295723	137	103	0.047974	sxestcfd
SF.f0830	0.136754	0.862177	0.389872	66	97	0.0478501	physiccut,rp01
PBAs.f0327	0.136467	-0.960169	0.337961	81	155	0.0477498	irascore
Behaviour.f0915	0.136091	-1.13344	0.257969	177	114	0.0476183	apathsv
Cognitive.f0222	0.135189	1.16458	0.244965	135	224	0.0473025	gen1
Motor.f0183	0.135049	-2.07352	0.0383935	515	435	0.0472537	sacinith,sacinitiationhor
Medical.f0141	0.134479	1.52269	0.128518	171	294	0.0470541	drugab
Behaviour.f0904	0.133848	-1.11575	0.265472	173	113	0.0468334	irritfr
Behaviour.f0920	0.131674	-1.07814	0.281921	164	111	0.0460727	irritrfr
PBAs.f0333	0.131635	-1.00292	0.316786	103	173	0.046059	bassuic,pbas2sv
SF.f0818	0.131194	0.834843	0.404964	69	105	0.0459048	general,general_sf36,gh01
SF.f0859	0.131133	0.749568	0.454755	49	95	0.0458834	sf,sf_nbs
HDCC.f0084	0.13097	-1.07542	0.283116	172	109	0.0458263	majorsymptomsubject,sxsubjm
SF.f0368	0.129672	-1.09333	0.275151	111	183	0.0453722	mh,mh_nbs,mhsubscore
MMSE.f0308	0.128918	-0.649688	0.517398	43	58	0.0451083
Behaviour.f0899	0.128602	-1.07775	0.282043	178	114	0.0449978	anxisv
PBAs.f0608	0.127751	0.760535	0.447941	53	127	0.0447	basanxworst,pbas3wo
CSRI.f0541	0.12756	0.896421	0.371139	102	94	0.0446331	csri29
PBAs.f0607	0.126776	0.777976	0.437616	53	127	0.044359	bassuicworst,pbas2wo
PBAs.f0332	0.125499	-0.989327	0.323376	103	173	0.043912	basdeprfre,pbas1fr
Care.f0876	0.125226	-0.647839	0.518369	74	44	0.0438167	crgvr13
HDCC.f0082	0.124814	-1.01997	0.308601	179	110	0.0436725	sxrater
Enrollment.f0648	0.124387	-0.628787	0.530894	58	46	0.0435229
dystonia.score	0.123715	-1.89958	0.0577916	513	435	0.043288
Medical.f0135	0.121389	1.26653	0.205962	171	293	0.0424739	alcab
CSRI.f0458	0.120982	-0.84438	0.399503	101	94	0.0423315	csri1
Cognitive.f0237	0.120745	1.47155	0.141669	308	290	0.0422486	scnt1
HDCC.f0081	0.118898	0.976526	0.32958	192	114	0.0416025	raterestimate,sxest
HDCC.f0078	0.118283	-0.946306	0.344829	168	107	0.0413874	sxsubj,symptomssubject
SF.f0381	0.118252	0.641493	0.522332	46	86	0.0413763
SF.f0365	0.117682	-1.00452	0.31596	110	183	0.0411769	vt,vt_nbs,vtsubscore
MMSE.f0306	0.115827	0.571002	0.569292	43	58	0.0405278
HDCC.f0080	0.115826	-0.938285	0.348892	180	107	0.0405275	hddiagn,hddiagnosed
Motor.f0197	0.115686	-1.7771	0.0758726	514	435	0.0404785	dysttrnk,maxdystrunk
Motor.f0194	0.113852	-1.74849	0.0807027	515	435	0.039837	rigarmr,rigarmsright
PBAs.f0616	0.113586	-0.663254	0.50803	53	126	0.0397439	basorientworst,pbas11wo
CSRI.f0470	0.112471	0.789571	0.430742	102	94	0.0393535	csri5
CSRI.f0479	0.111902	-0.7796	0.436577	102	94	0.0391546	csri7
SF.f0851	0.110801	0.705041	0.481797	66	98	0.0387692	gh03,healthy
SF.f0837	0.110676	0.701978	0.483694	66	99	0.0387255	extent,sf01
Enrollment.f0095	0.107046	-0.716339	0.474732	93	85	0.0374555	fhx
PBAs.f0359	0.106946	-0.54888	0.584134	41	78	0.0374204	bashousehold,pbahshd
SF.f0841	0.106067	0.660372	0.509948	66	99	0.037113	mh01,nervous
Cognitive.f0257	0.106013	0.895186	0.371373	122	194	0.037094	verflt06
Enrollment.f0100	0.105673	-0.43518	0.664873	33	34	0.0369751
HDCC.f0068	0.105166	-0.927414	0.354406	195	129	0.0367978	apathy,ccapt
PBAs.f0358	0.103775	0.829531	0.407529	103	172	0.0363109	basrelative,pbainfo
Motor.f0201	0.101041	-1.55253	0.120871	514	435	0.0353541	dystlle,maxdyslle
CSRI.f0488	0.100746	-0.57362	0.567139	53	90	0.035251	csri10
MHx.f0102	0.100592	0.690884	0.490486	104	87	0.0351972	alcoholabuse,hxalcab
Motor.f0193	0.100413	-1.54585	0.122473	518	437	0.0351346	luria
PBAs.f0335	0.0992815	-0.793673	0.428072	103	173	0.0347386	basanx,pbas3sv
SF.f0361	0.0965796	0.801075	0.423746	113	178	0.0337932	pf,pf_nbs,pfsubscore
CSRI.f0464	0.0962256	-0.669491	0.503982	101	94	0.0336693	csri3
SF.f0362	0.0961867	-0.818439	0.413774	113	181	0.0336557	rp,rp_nbs,rpsubscore
CSSRS.f0259	0.0950207	0.42357	0.673045	34	46	0.0332477	sid1
PBAs.f0615	0.0930073	0.632375	0.527958	53	126	0.0325433	bashallworst,pbas10wo
SF.f0847	0.0918697	0.572426	0.567822	66	99	0.0321452	happy,mh05
CSRI.f0506	0.0918432	-0.63933	0.523366	101	94	0.0321359	csri16
CSRI.f0563	0.0911951	-0.632952	0.52751	101	95	0.0319092	csri40
SF.f0845	0.0911624	0.558519	0.577261	66	98	0.0318977	downheart,mh04
SF.f0850	0.0894558	0.569311	0.569933	66	98	0.0313006	gh02,sick
Cognitive.f0235	0.0876122	-0.765633	0.444421	128	217	0.0306555	verfct7
Behaviour.f0918	0.0875673	-0.71521	0.475088	165	111	0.0306398	deprexam
MMSE.f0311	0.0869378	0.429851	0.668248	43	57	0.0304196
Cognitive.f0253	0.0856936	0.577064	0.564594	74	114	0.0299842	trlb2
HDCC.f0085	0.0850507	-0.684026	0.494546	170	102	0.0297592	majorsymptomfamily,sxfamm
rigidity.score	0.0822774	-1.2633	0.206793	515	435	0.0287889
factor.score.prod	0.0797977	-1.23976	0.215363	522	449	0.0279212
Cognitive.f0231	0.0789971	-0.747605	0.455189	135	225	0.0276411	verfct
SF.f0840	0.0762747	0.480426	0.631569	66	99	0.0266885	life,vt01
CSRI.f0547	0.076128	-0.531486	0.595687	102	95	0.0266372	csri32
CSRI.f0577	0.0760665	0.534897	0.593337	100	95	0.0266157	csri47
Behaviour.f0905	0.0751333	-0.622541	0.534086	173	113	0.0262892	irritsv
PBAs.f0610	0.0742075	0.449589	0.653554	53	127	0.0259652	basbehworst,pbas5wo
Functional.f2452	0.072871	0.325787	0.745377	58	30	0.0254976	uhdrs76
PBAs.f0339	0.0688616	-0.545128	0.586109	103	173	0.0240947	basbeh,pbas5sv
MMSE.f0291	0.0683564	-0.332974	0.739865	43	57	0.0239179	mmsetotal
PBAs.f0348	0.0682336	-0.549617	0.583032	103	172	0.0238749	basdelfre,pbas9fr
Care.f0887	0.0677307	-0.355815	0.722626	74	44	0.023699	crgvr24
Care.f0882	0.0661258	-0.343449	0.731888	74	43	0.0231374	crgvr19
CSRI.f0583	0.0652676	0.392993	0.694922	52	90	0.0228371	csri50
HDCC.f0056	0.0649818	0.548096	0.584032	189	114	0.0227371	momhd
CSRI.f0557	0.0638534	0.387114	0.699251	53	91	0.0223423	csri37
HDCC.f0075	0.0635964	-0.551811	0.58147	193	123	0.0222524	cccog,dementia
Medical.f0137	0.0632422	0.660394	0.50933	171	293	0.0221285	tobab
SF.f0853	0.0631193	0.392678	0.695077	66	97	0.0220854	excellent,gh05
Physio.f0324	0.0629024	-0.272615	0.785929	30	44	0.0220095	scst
CSRI.f0518	0.0627477	0.379008	0.705252	53	90	0.0219554	csri20
Cognitive.f1214	0.06223	0.269968	0.787889	51	30	0.0217743	smell_pct,upsitresponses
HDCC.f0072	0.061787	0.542958	0.587531	196	131	0.0216193	ccpsy,psychosis
PBAs.f0340	0.0612775	-0.489326	0.625002	103	173	0.021441	basbehfre,pbas5fr
PBAs.f0347	0.0599946	-0.488099	0.625871	103	172	0.0209921	basdel,pbas9sv
PBAs.f0328	0.0557831	0.437045	0.662482	81	155	0.0195185	psyscore
SF.f0378	0.055302	0.298523	0.765781	46	86	0.0193502
SF.f0855	0.0516212	0.288833	0.773143	49	91	0.0180623	rp,rp_nbs
Care.f0875	0.0499469	0.258828	0.796223	74	45	0.0174764	crgvr12
SF.f0846	0.0494973	0.306136	0.759899	65	97	0.0173191	vt03,wornout
Unnamed: 0	0.0490817	-0.76255	0.445917	522	449	0.0171737
handed	0.0485281	0.412911	0.679955	197	117	0.01698
Functional.f1249	0.0470876	-0.27951	0.780263	85	58	0.016476	fafinan,finances,finances_function,uhdrs46
Cognitive.f0256	0.0462676	-0.540724	0.588917	306	246	0.016189	verflt05
PBAs.f0355	0.0450914	-0.325315	0.745192	103	172	0.0157775	bashallfre,pbas10fr
Behaviour.f0893	0.0441051	-0.202733	0.839709	40	75	0.0154324	behaviour_psyscore
PBAs.f0349	0.0437974	0.366655	0.71416	103	172	0.0153247	bashall,pbas10sv
MMSE.f0318	0.0420321	-0.212435	0.832204	43	58	0.014707
MMSE.f0320	0.0420321	-0.212435	0.832204	43	58	0.014707
HDCC.f0059	0.0408048	0.215031	0.830138	63	50	0.0142776	dadagesx
Cognitive.f0258	0.0403137	0.349374	0.727043	122	194	0.0141058	verflt07
Motor.f0195	0.039582	-0.607685	0.543542	515	435	0.0138497	rigarml,rigarmsleft
HDCC.f0086	0.0374411	-0.318349	0.750437	192	116	0.0131006	majorsymptomrater,sxraterm
MHx.f0103	0.0359584	-0.259911	0.795188	115	96	0.0125819	hxtobab,smoking,smoking_hx
HDCC.f0060	0.0357971	-0.303269	0.76189	191	118	0.0125254	ccmtr,motor
Behaviour.f0910	0.0357596	0.295242	0.768021	177	114	0.0125123	delusfr
Motor.f0198	0.0353113	-0.541949	0.587981	513	435	0.0123554	dystrue,maxdysrue
Medical.f0140	0.0342498	-0.206039	0.837036	58	96	0.011984	cafpd
SF.f0364	0.0333275	0.282306	0.777909	113	181	0.0116613	gh,gh_nbs,ghsubscore
SF.f0844	0.0315237	-0.202625	0.839666	69	106	0.0110302	energy,energy_sf36,vt02
Cognitive.f0247	0.0279811	0.24518	0.806467	129	208	0.00979059	sit3
Physio.f0323	0.027582	-0.107767	0.914502	30	39	0.00965093	tug1
CSRI.f0539	0.027443	-0.191821	0.848083	102	94	0.00960232	csri28
MMSE.f0298	0.0239199	0.118229	0.906126	43	58	0.00836957
Motor.f0199	0.0229334	-0.351977	0.724934	514	435	0.00802441	dystlue,maxdyslue
HDCC.f0057	0.0223693	0.124349	0.901231	82	50	0.00782703	momagesx
CSRI.f0484	0.0217345	0.103884	0.917464	34	71	0.00760491	csri8b
Cognitive.f0248	0.021411	-0.196585	0.844269	146	198	0.00749171	trl
PBAs.f0338	0.0208704	-0.164896	0.869148	103	173	0.00730255	basirritfre,pbas4fr
MMSE.f0307	0.0198436	-0.0987868	0.921507	43	58	0.00694327
Cognitive.f0245	0.018852	0.227682	0.819973	304	282	0.00659633	sit1
Behaviour.f0911	0.0188432	0.157746	0.874767	177	114	0.00659323	delussv
SF.f0379	0.0164916	-0.0876545	0.930287	45	86	0.0057704
PBAs.f0337	0.0106414	-0.0842845	0.932892	103	173	0.00372343	basirrit,pbas4sv
MMSE.f0312	0.00966016	-0.0480292	0.96179	43	58	0.00338009
Enrollment.f0096	0.0095539	0.0636252	0.949341	93	85	0.00334291
HDCC.f0061	0.00778068	-0.0648296	0.948353	183	115	0.00272246	ccmtrage,motorage
SF.f0367	0.00635704	0.0541509	0.956852	112	184	0.00222433	re,re_nbs,resubscore
MMSE.f0321	0.00459123	-0.0228353	0.981828	43	58	0.00160647
CSRI.f0500	0.00451943	0.0261583	0.979168	53	90	0.00158135	csri14
Behaviour.f0921	0.00169448	0.014074	0.988781	177	113	0.000592899	isobt

## Sheet: cons_states_5_6
var	d	t_val	p_val	#samples_st5	#samples_st6	d_normalized	var_name
Motor.f0180	1.65204	-35.3974	1.23807e-211	1159	760	0.382614	miscore
Motor.f0179	1.61934	-35.9279	1.38027e-219	1225	823	0.37504	motorscore,motscore
Motor.f2447	1.28776	-6.64747	1.29386e-09	53	56	0.298245	brady_tot
Cognitive.f0654	1.02887	8.36797	5.75564e-16	424	84	0.238286	cogscore
oculo.score	1.00207	-22.3352	3.67727e-99	1238	830	0.232079
Cognitive.f0229	0.9635	18.5677	2.41785e-69	825	656	0.223147	sdmt_correct,sdmt1
Cognitive.f0241	0.946163	18.0228	1.20503e-65	799	644	0.219131	stroop_correct,swr_correct,swrt1
Cognitive.f0237	0.919872	17.4712	4.31204e-62	793	636	0.213042	scnt1
Motor.f0192	0.899455	-20.0538	7.01729e-82	1237	831	0.208314	prosuphandsleft,prosupl
Motor.f2450	0.898957	-4.61505	1.0969e-05	53	56	0.208198	chorea
Motor.f0209	0.881292	-19.6501	5.9302e-79	1238	831	0.204107	gait
GCI.f0863	0.857714	-13.5595	6.76767e-39	734	389	0.198647	svrtyll
Motor.f2449	0.847269	-4.17371	6.12114e-05	53	56	0.196228	dystonia
Motor.f0186	0.826631	-18.4298	2.40398e-70	1238	831	0.191448	sacvelocityver,sacvelv
Functional.f0219	0.820929	16.738	2.24132e-58	1001	720	0.190127	fascore,functionscore
Motor.f0187	0.810219	-18.0608	8.11298e-68	1237	831	0.187647	dysarth,dysarthria
Motor.f0184	0.809462	-18.0429	1.07275e-67	1238	830	0.187471	sacinitiationver,sacinitv
Functional.f0220	0.807543	16.6903	3.49761e-58	1024	743	0.187027	fiscore
finger.score	0.80138	-17.8666	1.67348e-66	1237	831	0.1856
Motor.f0185	0.795258	-17.7315	1.34791e-65	1238	831	0.184182	sacvelh,sacvelocityhor
Motor.f0191	0.792937	-17.6772	3.12886e-65	1237	831	0.183644	prosuphandsright,prosupr
Motor.f2446	0.788299	-4.09692	8.16486e-05	53	56	0.18257	oculo
Motor.f0196	0.771089	-17.1688	7.40599e-62	1233	830	0.178584	bradkinbody,brady
brady.score	0.771089	-17.1688	7.40599e-62	1233	830	0.178584
Cognitive.f0245	0.752323	14.0631	4.12417e-42	790	609	0.174238	sit1
Motor.f0190	0.745833	-16.6282	2.27956e-58	1237	831	0.172735	fingertapsleft,fingtapl
chorea.score	0.732388	-16.3256	1.90038e-56	1237	831	0.169621
Functional.f0221	0.729784	15.19	4.34138e-49	1032	747	0.169018	indepencescale,indepscl
Motor.f0189	0.727617	-16.2219	8.53234e-56	1237	831	0.168516	fingertapsright,fingtapr
Motor.f0182	0.717454	-15.991	2.35206e-54	1238	830	0.166162	ocularv,ocupursuitver
Motor.f0183	0.706556	-15.7492	7.28408e-53	1238	830	0.163638	sacinith,sacinitiationhor
Functional.f2453	0.70206	-3.92442	0.000154782	53	55	0.162597	uhdrs80
Motor.f0210	0.695601	-15.4967	2.53303e-51	1237	829	0.161101	tandem,tandemwalk
Cognitive.f0249	0.679586	-7.3578	6.88797e-13	233	316	0.157392	traila_time,trla1
Functional.f0213	0.666955	14.6237	4.50641e-46	1169	819	0.154467	functionalscore,tfcscore
dystonia.score	0.665817	-14.8363	2.14776e-47	1237	831	0.154203
MHx.f0105	0.635696	-2.62825	0.0104565	30	45	0.147227	hxtobyos,smokyears
Care.f0867	0.631113	-6.20435	1.2757e-09	303	136	0.146166	crgvr4
Motor.f0202	0.630772	-14.0639	5.67493e-43	1238	831	0.146087	choreaface,chorface
Care.f0864	0.629309	-6.08418	2.56494e-09	302	136	0.145748	crgvr1
Motor.f2448	0.62413	-3.17112	0.00198142	53	56	0.144548	rigidity
Care.f0865	0.619632	-5.9718	4.87203e-09	303	135	0.143507	crgvr2
CSRI.f0767	0.618977	-6.09003	2.5421e-09	270	154	0.143355
Functional.f0214	0.616586	13.5671	3.64569e-40	1169	819	0.142801	fcoccupation,occupatn
Motor.f0181	0.614871	-13.7042	5.60483e-41	1238	830	0.142404	ocularh,ocupursuithor
Motor.f0203	0.601158	-13.4032	2.42054e-39	1238	831	0.139228	chorbol,choreabol
Motor.f0204	0.596232	-13.2908	9.72447e-39	1237	831	0.138087	choreatrunk,chortrnk
Cognitive.f0667	0.591878	2.88793	0.00476293	50	51	0.137079	mdrs2
Motor.f0206	0.576199	-12.8467	2.13195e-36	1238	831	0.133448	chorealue,chorlue
Motor.f0205	0.574638	-12.8119	3.23127e-36	1238	831	0.133086	chorearue,chorrue
Motor.f0197	0.567074	-12.637	2.57907e-35	1237	831	0.131334	dysttrnk,maxdystrunk
SF.f0821	0.555554	4.78251	2.68419e-06	155	156	0.128666	activitiesm,pf02
Cognitive.f0252	0.517211	-5.77463	1.31001e-08	229	307	0.119786	trailb_time,trlb1
SF.f0854	0.516019	4.21765	3.34348e-05	133	147	0.11951	pf,pf_nbs
Motor.f0211	0.507652	-11.3096	8.12854e-29	1237	829	0.117572	retpulltest,retropls
Motor.f0188	0.506724	-11.2937	9.62548e-29	1238	830	0.117357	tongue,tonprotrusion
Motor.f0208	0.502114	-11.195	2.75943e-28	1238	831	0.11629	chorealle,chorlle
Motor.f0207	0.502066	-11.1937	2.79763e-28	1238	831	0.116278	chorearle,chorrle
Care.f0869	0.494631	-4.85681	1.66457e-06	303	136	0.114556	crgvr6
Motor.f0199	0.489756	-10.9149	5.26069e-27	1237	831	0.113427	dystlue,maxdyslue
Cognitive.f0233	0.486493	6.93175	8.63866e-12	297	495	0.112672	verfct5
Motor.f0200	0.485536	-10.8185	1.42836e-26	1237	831	0.11245	dystrle,maxdysrle
rigidity.score	0.484348	-10.7951	1.81824e-26	1238	830	0.112175
Motor.f0201	0.483679	-10.7772	2.18629e-26	1237	831	0.11202	dystlle,maxdyslle
Care.f0879	0.481763	-4.81417	2.04163e-06	303	135	0.111576	crgvr16
Motor.f0194	0.477277	-10.6376	9.1211e-26	1238	830	0.110537	rigarmr,rigarmsright
Motor.f0198	0.473052	-10.5429	2.3827e-25	1237	831	0.109559	dystrue,maxdysrue
Care.f0866	0.469967	-4.57575	6.19141e-06	303	136	0.108844	crgvr3
Cognitive.f0662	0.460194	-2.45634	0.0154794	59	62	0.106581	hvlt3
Functional.f0216	0.458502	9.93946	9.65242e-23	1159	791	0.106189	chores,fcdomestic
Motor.f0212	0.449716	-9.95603	8.18789e-23	1139	821	0.104154	diagconf
Functional.f0215	0.438713	9.70088	8.83008e-22	1196	831	0.101606	fcfinances,finances,finances_tfc
Motor.f0195	0.435105	-9.69766	8.91312e-22	1238	830	0.10077	rigarml,rigarmsleft
SF.f0827	0.428504	3.67764	0.000277845	155	154	0.0992416	pf08,walkings
Cognitive.f0256	0.427471	7.7335	2.03248e-14	804	550	0.0990022	verflt05
MMSE.f0308	0.420399	2.55235	0.011482	62	131	0.0973644
Behaviour.f0917	0.419656	-5.85767	6.77168e-09	580	249	0.0971924	dement
Functional.f1246	0.406506	2.27308	0.0249814	53	58	0.0941467	employmentaccu,emplusl,uhdrs43
MMSE.f0291	0.402319	2.48494	0.0138216	62	130	0.0931771	mmsetotal
SF.f0820	0.398138	3.51198	0.000511332	155	155	0.0922088	activitiesv,pf01
HDCC.f0070	0.397005	-4.82314	1.78504e-06	369	246	0.0919463	ccpob,obsessive
Cognitive.f0658	0.395242	2.16651	0.0322826	58	62	0.091538	hvltt21
SF.f0371	0.391677	-2.58829	0.0102492	67	169	0.0907123
SF.f0374	0.39013	2.61713	0.00945023	67	167	0.090354
SF.f0825	0.385478	3.327	0.000985266	153	154	0.0892766	bending,pf06
MMSE.f0298	0.381857	-2.98155	0.00323944	63	131	0.0884381
SF.f0828	0.381665	3.24535	0.00130347	154	153	0.0883936	pf09,walkingo
MMSE.f0309	0.381065	2.39109	0.0177694	62	131	0.0882546
Cognitive.f0255	0.37545	5.1863	2.62615e-07	376	568	0.0869543	verflt
MMSE.f0300	0.373925	1.87611	0.0621577	63	131	0.086601
MMSE.f0292	0.373925	1.87611	0.0621577	63	131	0.086601
SF.f0826	0.367939	3.18789	0.0015809	155	154	0.0852147	pf07,walkingm
Motor.f0193	0.357459	-7.97136	2.57146e-15	1235	833	0.0827875	luria
Care.f0868	0.356646	-3.52344	0.000470992	302	136	0.0825991	crgvr5
PBAs.f0616	0.353232	-2.54695	0.0113032	93	252	0.0818086	basorientworst,pbas11wo
Scl90r.f2471	0.351985	1.48814	0.14108	44	30	0.0815198	tpsychoticism_p
Care.f0870	0.350945	-3.41816	0.000689558	303	136	0.0812789	crgvr7
SF.f0824	0.3418	2.96239	0.0032927	154	153	0.0791608	climbingo,pf05
SF.f0822	0.338511	2.93666	0.0035686	154	155	0.0783991	lifting,pf03
SF.f0794	0.33315	2.3901	0.0173648	301	56	0.0771576	sf13
Functional.f1252	0.326162	1.65009	0.101804	53	58	0.0755392	children,children_function,supchild,uhdrs49
SF.f0832	0.32248	2.79273	0.00556002	153	151	0.0746865	physiclimit,rp03
Care.f0871	0.321934	-3.14749	0.00175954	303	136	0.07456	crgvr8
SF.f0372	0.321598	2.14688	0.0328403	67	167	0.0744821
SF.f0375	0.320969	2.16324	0.0315577	65	166	0.0743364
CSRI.f0551	0.318788	-3.57904	0.000377086	308	215	0.0738314	csri34
MHx.f0104	0.318673	-1.35446	0.179657	31	46	0.0738047	cigperday,hxtobcpd,numbercigarettes
CSRI.f0549	0.314413	-3.5409	0.000434374	309	216	0.0728181	csri33
Cognitive.f0659	0.309079	1.70903	0.0900529	59	62	0.0715827	hvltt31
Cognitive.f0663	0.308262	-1.77158	0.0790449	59	61	0.0713935	hvlt4
CSRI.f0515	0.306438	-3.44358	0.000620188	306	218	0.0709711	csri19
CSRI.f0775	0.304165	-1.90875	0.0580093	75	94	0.0704445	csri60__1
MMSE.f0310	0.300148	1.81244	0.071489	62	131	0.0695142
Functional.f1253	0.298923	1.56047	0.121548	53	58	0.0692305	automobile,drive,uhdrs50
CSRI.f0776	0.296316	-1.56781	0.119771	57	56	0.0686268	csri60__2
CSRI.f0774	0.296028	2.09528	0.0375936	79	97	0.0685601	csri59
Summary.f0778	0.290259	4.60749	4.5254e-06	775	389	0.0672239	impwrsex
SF.f0369	0.287532	3.12901	0.00185698	201	298	0.0665925	pcs,pcsum
SF.f0829	0.285747	2.46263	0.0143445	153	154	0.066179	bathing,pf10
SF.f0382	0.28529	1.94524	0.0529544	66	168	0.0660732
CSRI.f0484	0.284906	2.27341	0.0238783	110	134	0.0659842	csri8b
CSRI.f0521	0.283782	-1.0754	0.284864	36	63	0.065724	csri21
CSRI.f0557	0.281553	-2.38339	0.0177298	146	180	0.0652076	csri37
MMSE.f0299	0.279302	1.40135	0.162722	63	131	0.0646864
Functional.f0217	0.276397	5.98891	2.5093e-09	1159	791	0.0640136	adl,fcadl
SF.f0823	0.275701	2.40902	0.0165859	155	153	0.0638524	climbings,pf04
Functional.f1255	0.275541	1.33713	0.18434	66	32	0.0638153	laundry,uhdrs52
SF.f0798	0.274726	1.8867	0.0600234	299	55	0.0636265	sf17
SF.f0782	0.274098	1.90189	0.0579969	300	56	0.0634812	sf1
SF.f0817	0.271872	-1.88501	0.0602595	296	55	0.0629655	sf36
Cognitive.f0250	0.270641	2.24756	0.0251178	170	256	0.0626805	trla2
MMSE.f0312	0.269454	1.73334	0.0846488	62	131	0.0624056
HDCC.f0068	0.26899	-3.27038	0.00113423	368	247	0.0622982	apathy,ccapt
Care.f0872	0.263505	-2.55076	0.0110902	302	135	0.0610277	crgvr9
Cognitive.f0666	0.261019	1.20388	0.231508	50	51	0.060452	mdrs1
Cognitive.f0248	0.260759	3.0578	0.00232272	242	400	0.0603917	trl
HDCC.f0067	0.259671	-1.90769	0.057789	117	96	0.0601398	ccvabage,violentage
SF.f0797	0.258769	1.871	0.0621669	301	56	0.059931	sf16
Cognitive.f1214	0.256377	-1.17938	0.241391	57	34	0.0593769	smell_pct,upsitresponses
Care.f0874	0.254437	-2.48661	0.0132691	303	136	0.0589275	crgvr11
Care.f0877	0.254221	-2.46929	0.0139196	303	136	0.0588776	crgvr14
PBAs.f0608	0.253383	2.0699	0.0392076	93	253	0.0586834	basanxworst,pbas3wo
Care.f0884	0.25264	-2.53591	0.0115638	303	135	0.0585115	crgvr21
Functional.f1247	0.252488	1.34724	0.180696	53	58	0.0584762	emplany,employment,uhdrs44
Behaviour.f0920	0.250585	-3.35639	0.000825696	581	248	0.0580355	irritrfr
Cognitive.f0661	0.250003	-1.30021	0.196042	59	62	0.0579006	hvlt2
CSRI.f0561	0.249939	-2.8077	0.00517538	310	217	0.0578858	csri39
CSRI.f0547	0.244855	-2.75046	0.00615699	310	216	0.0567084	csri32
HDCC.f0064	0.243459	-2.9774	0.00302055	372	250	0.0563851	ccirb,irritability
SF.f0791	0.242437	1.73043	0.0844232	301	56	0.0561483	sf10
SF.f0792	0.241078	1.70459	0.0891458	301	56	0.0558337	sf11
Care.f0875	0.24045	-2.32749	0.020395	303	136	0.0556882	crgvr12
CSRI.f0490	0.240254	1.20688	0.230573	42	52	0.0556429	csri10b
PBAs.f0606	0.239811	2.0619	0.039966	94	253	0.0555402	basdeprworst,pbas1wo
SF.f0368	0.239474	-2.80395	0.00523249	215	319	0.0554622	mh,mh_nbs,mhsubscore
SF.f0373	0.239358	1.61928	0.106775	64	165	0.0554352
Care.f0876	0.235671	-2.27612	0.0233228	302	136	0.0545815	crgvr13
CSRI.f0539	0.233174	2.64149	0.00850182	307	217	0.0540031	csri28
SF.f0830	0.230173	2.00665	0.0456698	155	152	0.0533081	physiccut,rp01
Summary.f0779	0.229673	3.64979	0.000274141	772	389	0.0531923	impwrssj
SF.f0378	0.228389	-1.50089	0.134756	64	168	0.0528949
Physio.f0322	0.225007	1.17665	0.241345	56	85	0.0521115	tug
Scl90r.f2476	0.224259	-0.898331	0.372429	34	31	0.0519383	tobsess_c
PBAs.f0357	0.221683	-2.37658	0.0178033	202	370	0.0513418	basorientfre,pbas11fr
Enrollment.f0645	0.220031	-1.83378	0.0677442	192	91	0.0509592
Care.f0881	0.214269	-2.04596	0.041392	288	128	0.0496246	crgvr18
Medical.f0138	0.214006	-1.74281	0.0824228	132	161	0.0495637	packy
Care.f0873	0.213937	-2.08194	0.0379303	302	136	0.0495479	crgvr10
CSRI.f0773	0.21357	-1.41839	0.157907	76	96	0.0494629	csri58
Cognitive.f0257	0.212171	-2.6991	0.00710722	311	451	0.0491389	verflt06
SF.f0380	0.211426	-1.49845	0.135388	65	167	0.0489662
PBAs.f0356	0.210403	-2.29882	0.0218763	202	370	0.0487294	basorient,pbas11sv
Summary.f0780	0.210213	-3.25189	0.0011793	774	391	0.0486852	dxentire
SF.f0790	0.208494	1.52619	0.127853	301	56	0.0482873	sf9
CSRI.f0463	0.205982	0.970223	0.335324	33	38	0.0477055	csri2b
CSRI.f0567	0.205104	-1.56825	0.1178	146	180	0.0475021	csri42
CSRI.f0579	0.202603	-1.64219	0.10152	146	180	0.0469228	csri48
MHx.f0106	0.201584	-1.35721	0.17636	110	78	0.0466868	hxpacky
MMSE.f0311	0.198581	1.27317	0.204506	62	131	0.0459913
MMSE.f0296	0.19696	1.22486	0.222128	63	131	0.0456159
Care.f0883	0.196931	-1.93619	0.0534916	301	136	0.0456093	crgvr20
MMSE.f0297	0.195959	0.983196	0.326748	63	131	0.0453842
HDCC.f0081	0.195635	2.34566	0.0193103	377	240	0.045309	raterestimate,sxest
CSRI.f0541	0.192863	2.18764	0.0291404	305	217	0.044667	csri29
Care.f0885	0.192164	-1.92095	0.0553898	302	136	0.0445051	crgvr22
Cognitive.f0669	0.191878	0.965404	0.336695	50	51	0.044439	mdrs4
SF.f0836	0.188901	1.64861	0.100254	154	154	0.0437494	emotioncare,re03
SF.f0361	0.18565	2.09873	0.0363178	214	313	0.0429966	pf,pf_nbs,pfsubscore
Enrollment.f0097	0.18453	-1.37458	0.171473	49	92	0.0427371
Behaviour.f0909	0.18379	-2.51856	0.0119653	598	257	0.0425658	compulsv
CSRI.f0503	0.180913	1.76415	0.0786547	144	180	0.0418994	csri15
MMSE.f0307	0.178482	1.13878	0.25622	62	131	0.0413365
Behaviour.f0891	0.178272	-1.59986	0.110636	156	160	0.0412878	defscore
SF.f0833	0.177526	1.5539	0.121242	155	153	0.0411151	physicdiff,rp04
Scl90r.f2480	0.177337	-0.746947	0.457528	39	35	0.0410713	thostility_c
Cognitive.f0246	0.177236	-2.0641	0.0393402	307	470	0.0410478	sit2
SF.f0862	0.176626	1.38875	0.166148	119	132	0.0409066	sfscore
SF.f0795	0.175946	1.26895	0.20529	301	56	0.0407491	sf14
MMSE.f0295	0.175087	1.03978	0.299749	63	131	0.0405501
SF.f0812	0.173656	-1.21925	0.223563	300	56	0.0402187	sf31
SF.f0806	0.173064	-1.16788	0.243642	299	56	0.0400817	sf25
SF.f0793	0.171804	1.20624	0.228528	301	56	0.0397898	sf12
MHx.f0107	0.171392	1.77543	0.07653	252	183	0.0396944	druguse,hxdrugab
CSRI.f0537	0.170337	1.61943	0.106343	141	180	0.03945	csri27
SF.f0855	0.169284	1.40478	0.161204	136	144	0.0392062	rp,rp_nbs
SF.f0831	0.168252	1.46063	0.145145	155	152	0.0389673	physicacc,rp02
CSRI.f0489	0.168068	0.832129	0.407468	43	52	0.0389245	csri10a
SF.f0852	0.167934	-1.46605	0.14366	154	154	0.0388935	gh04,worse
HDCC.f0065	0.167771	-1.76366	0.0784793	249	195	0.0388557	ccirbage,irritage
Functional.f1271	0.167473	-0.873416	0.384374	53	57	0.0387868	fasrc,funcassfrom,uhdrs68
CSRI.f0512	0.166996	-1.26807	0.205691	144	180	0.0386762	csri18
Medical.f0140	0.166004	-1.18659	0.236432	67	205	0.0384464	cafpd
Cognitive.f0231	0.164789	-2.49937	0.0126334	322	511	0.0381651	verfct
Enrollment.f0099	0.164709	0.728577	0.467486	49	92	0.0381465
SF.f0365	0.164335	-1.94859	0.0518703	214	320	0.03806	vt,vt_nbs,vtsubscore
HDCC.f0069	0.164305	-1.64105	0.101577	220	180	0.038053	apathyage,ccaptage
SF.f0796	0.163545	1.18249	0.237806	300	56	0.0378771	sf15
MMSE.f0318	0.163392	-1.27335	0.204435	63	131	0.0378416
Care.f0882	0.161984	-1.58105	0.114596	301	135	0.0375154	crgvr19
Care.f0880	0.16039	-1.54685	0.122643	296	132	0.0371463	crgvr17
WPAI.f0600	0.160382	-0.860565	0.391152	44	81	0.0371445
WPAI.f0594	0.160382	-0.860565	0.391152	44	81	0.0371445	wpaiscr4
PBAs.f0607	0.160225	1.45449	0.14672	94	253	0.037108	bassuicworst,pbas2wo
SF.f0364	0.160057	-1.87405	0.0614629	220	323	0.0370691	gh,gh_nbs,ghsubscore
SF.f0366	0.159769	-1.90171	0.0577426	220	321	0.0370026	sf,sf_nbs,sfsubscore
CSSRS.f0278	0.159598	1.37565	0.170201	101	143	0.0369628	sbh6
Behaviour.f0907	0.159544	-2.15313	0.0315872	602	256	0.0369504	obsesssv
SF.f0787	0.159122	-1.07303	0.283987	301	56	0.0368527	sf6
CSRI.f0575	0.15901	-1.78018	0.0756263	310	216	0.0368268	csri46
HDCC.f0077	0.156891	-1.19554	0.232763	82	239	0.0363359	hxsid
MHx.f0102	0.155942	1.6126	0.10756	252	183	0.0361162	alcoholabuse,hxalcab
CSRI.f0571	0.152021	-1.69493	0.0906823	310	217	0.035208	csri44
HDCC.f0061	0.150233	-1.79448	0.0732446	359	237	0.034794	ccmtrage,motorage
Behaviour.f0915	0.149501	-2.02481	0.0431972	600	256	0.0346244	apathsv
MMSE.f0320	0.148966	-1.06701	0.287313	63	130	0.0345006
Functional.f1273	0.146991	0.752482	0.453398	53	57	0.034043	fcinfosource,tfcsrc,uhdrs75
Cognitive.f0244	0.145686	2.07872	0.0379129	377	567	0.0337409	sit
Cognitive.f0254	0.145217	-1.28288	0.200192	193	262	0.0336322	trialb_error,trlb3
SF.f0834	0.14462	1.26735	0.205988	155	155	0.0334939	emotioncut,re01
Behaviour.f0893	0.14384	1.35895	0.175138	156	160	0.0333134	behaviour_psyscore
SF.f0789	0.142341	1.00154	0.317252	299	56	0.0329662	sf8
HDCC.f0066	0.142063	-1.73404	0.0834101	371	249	0.0329017	ccvab,violent
SF.f0363	0.141189	-1.69463	0.0907253	218	321	0.0326993	bp,bp_nbs,bpsubscore
HDCC.f0086	0.140704	-1.70532	0.0886396	377	240	0.0325871	majorsymptomrater,sxraterm
SF.f0788	0.140676	0.945724	0.344936	299	56	0.0325805	sf7
PBAs.f0342	0.13984	-1.57713	0.115321	201	370	0.0323868	basapathfre,pbas6fr
MHx.f0103	0.139524	1.47063	0.142086	263	192	0.0323137	hxtobab,smoking,smoking_hx
CSRI.f0476	0.139489	0.710986	0.478799	36	63	0.0323057
SF.f0819	0.138126	-1.21318	0.225986	155	156	0.03199	compared,ht
MMSE.f0304	0.13803	0.692546	0.489432	63	131	0.0319678
MMSE.f0303	0.13803	0.692546	0.489432	63	131	0.0319678
MMSE.f0317	0.13803	0.692546	0.489432	63	131	0.0319678
SF.f0835	0.137722	1.19706	0.232213	155	152	0.0318964	emotionacc,re02
Enrollment.f0100	0.137446	0.737841	0.461855	49	92	0.0318325
Behaviour.f0906	0.136155	-1.83209	0.0672862	601	256	0.0315336	obsessfr
SF.f0839	0.135119	1.19997	0.23108	154	154	0.0312935	bp02,interferework
HDCC.f0080	0.134656	-1.61917	0.105929	373	237	0.0311863	hddiagn,hddiagnosed
HADS.f0384	0.133466	-1.49546	0.135419	227	281	0.0309108	depscore,hads_depscore
SF.f0838	0.133442	1.18023	0.238822	155	154	0.0309051	bodypain,bp01
CSRI.f0470	0.131817	-1.47854	0.139868	306	217	0.0305289	csri5
SF.f0813	0.130652	-0.885217	0.376642	299	56	0.0302591	sf32
SF.f0860	0.130067	1.08701	0.277959	137	148	0.0301236	re,re_nbs
Behaviour.f0914	0.128909	-1.73323	0.0834156	600	256	0.0298553	apathfr
Care.f0878	0.12808	-1.24254	0.214702	303	136	0.0296633	crgvr15
CSRI.f0487	0.127558	0.596148	0.552781	33	48	0.0295425	csri9b
Behaviour.f0908	0.127511	-1.72527	0.0848405	598	257	0.0295314	compulfr
CSRI.f0524	0.126712	1.2366	0.217137	144	180	0.0293464	csri22
Functional.f2452	0.125762	-0.59281	0.554812	52	39	0.0291265	uhdrs76
Cognitive.f0222	0.125072	1.57434	0.11579	321	510	0.0289667	gen1
PBAs.f0333	0.124825	1.52908	0.126799	202	371	0.0289095	bassuic,pbas2sv
PBAs.f0335	0.123567	1.42413	0.154956	202	371	0.0286181	basanx,pbas3sv
HDCC.f0078	0.123453	-1.44695	0.148454	355	225	0.0285917	sxsubj,symptomssubject
Cognitive.f0243	0.122958	1.80836	0.070922	311	498	0.0284771	swrt3
Behaviour.f0921	0.121506	-1.62313	0.104929	600	257	0.0281408	isobt
MMSE.f0306	0.120624	0.776208	0.438586	62	131	0.0279366
Cognitive.f0251	0.120194	-1.25986	0.208361	194	267	0.0278369	triala_error,trla3
HDCC.f0075	0.119959	-1.45474	0.146256	368	245	0.0277825	cccog,dementia
Functional.f0218	0.119921	2.5962	0.00949701	1159	790	0.0277737	carelevl,fccarelevel
CSRI.f0587	0.117753	-0.897257	0.37025	145	180	0.0272717	csri52
CSRI.f0581	0.117753	-0.897257	0.37025	145	180	0.0272717	csri49
CSRI.f0585	0.117753	-0.897257	0.37025	145	180	0.0272717	csri51
CSRI.f0533	0.117753	-0.89415	0.37191	144	180	0.0272717	csri25
PBAs.f0334	0.117623	1.44595	0.148741	202	371	0.0272415	bassuicfre,pbas2fr
CSRI.f0467	0.116804	1.11345	0.266349	143	180	0.0270519	csri4
Scl90r.f2482	0.116598	-0.501149	0.617754	41	35	0.0270042	tparanoid_c
SF.f0376	0.114764	0.779729	0.436349	66	167	0.0265793
CSRI.f0546	0.114001	-0.689927	0.491239	77	85	0.0264027	csri31a
PBAs.f0344	0.111194	-1.20202	0.229881	182	362	0.0257526	baspersevfre,pbas7fr
PBAs.f0348	0.109523	1.35195	0.176928	202	371	0.0253655	basdelfre,pbas9fr
SF.f0844	0.109085	-0.971874	0.331864	156	159	0.0252641	energy,energy_sf36,vt02
CSRI.f0563	0.108477	-1.22054	0.22281	310	217	0.0251233	csri40
CSRI.f0485	0.107786	-1.2135	0.225487	306	217	0.0249632	csri9
CSRI.f0573	0.107642	1.11847	0.264201	144	180	0.02493	csri45
CSRI.f0555	0.107246	-1.19184	0.233863	308	217	0.0248381	csri36
motor_examiner_ext	0.106708	-0.537633	0.591968	52	55	0.0247136
SF.f0807	0.106246	0.703118	0.482447	298	56	0.0246065	sf26
SF.f0818	0.106181	-0.951272	0.342189	158	162	0.0245916	general,general_sf36,gh01
SF.f0785	0.10597	0.724474	0.469255	299	56	0.0245427	sf4
Functional.f1249	0.102357	-0.624533	0.533239	78	72	0.0237059	fafinan,finances,finances_function,uhdrs46
CSRI.f0577	0.10215	1.15773	0.247503	310	217	0.023658	csri47
Behaviour.f0898	0.101816	-1.37328	0.170024	602	257	0.0235807	anxifr
Cognitive.f0230	0.101214	-1.34608	0.178653	314	501	0.0234411	sdmt2
HDCC.f0063	0.100902	-1.02968	0.303731	267	171	0.0233689	ccdepage,depressage
CSSRS.f0259	0.100269	0.780303	0.435975	101	143	0.0232224	sid1
Behaviour.f0919	0.0985455	-1.30205	0.19326	581	248	0.0228231	deprrfr
SF.f0808	0.098258	-0.673929	0.500798	300	55	0.0227565	sf27
PBAs.f0614	0.0977896	0.816488	0.414786	93	253	0.0226481	basdelworst,pbas9wo
CSRI.f0479	0.0964282	1.08851	0.276877	303	218	0.0223328	csri7
SF.f0377	0.0963121	0.649557	0.516629	65	166	0.0223059
Behaviour.f0916	0.0957765	-1.30206	0.193259	581	249	0.0221818	confus
HDCC.f0060	0.0957482	-1.14802	0.251417	365	240	0.0221753	ccmtr,motor
MMSE.f0301	0.0954518	0.601012	0.548541	63	131	0.0221066
PBAs.f0329	0.095107	-1.02613	0.3053	175	357	0.0220268	aptscore
HDCC.f0079	0.0950565	-1.09977	0.271904	343	220	0.0220151	sxfam,symptomsfamily
MMSE.f0293	0.0948258	-0.645338	0.519479	63	131	0.0219616
PBAs.f0358	0.0911255	1.05019	0.294074	204	370	0.0211047	basrelative,pbainfo
Behaviour.f0912	0.0911191	-1.29948	0.194128	602	257	0.0211032	hallucfr
CSRI.f0458	0.0902854	-1.0187	0.308815	306	218	0.0209101	csri1
HDCC.f0084	0.0890672	-1.05645	0.291193	366	229	0.020628	majorsymptomsubject,sxsubjm
Medical.f0135	0.0889454	1.43665	0.151113	452	604	0.0205998	alcab
Care.f0887	0.0882785	-0.861542	0.389416	300	135	0.0204453	crgvr24
CSRI.f0518	0.0874362	-0.768468	0.442772	144	180	0.0202502	csri20
HDCC.f0085	0.0868806	-1.02468	0.305943	352	230	0.0201215	majorsymptomfamily,sxfamm
Behaviour.f0888	0.0864338	-1.13072	0.258515	554	243	0.0200181	behscore
SF.f0853	0.0854955	-0.751605	0.452866	154	154	0.0198008	excellent,gh05
SF.f0802	0.0850927	0.58795	0.55694	300	56	0.0197075	sf21
Scl90r.f2470	0.0847554	0.384446	0.701655	42	41	0.0196294	tparanoid_p
Behaviour.f0889	0.0847229	-1.14438	0.252787	603	257	0.0196218	biscore
HDCC.f0082	0.0829529	-0.981496	0.326756	351	233	0.0192119	sxrater
PBAs.f0612	0.0823338	-0.612792	0.540456	78	239	0.0190685	pbas7wo
HDCC.f0071	0.0822306	-0.724646	0.469216	158	154	0.0190446	ccpobage,obsessage
Enrollment.f0101	0.0819639	0.823646	0.410606	241	183	0.0189828
SF.f0370	0.0815205	-0.911056	0.362707	201	298	0.0188801	mcs,mcsum
PBAs.f0609	0.0797124	-0.647006	0.518058	94	253	0.0184614	basirritworst,pbas4wo
Cognitive.f0655	0.0796241	-0.577576	0.564175	106	104	0.0184409	hvlt
Cognitive.f0670	0.0792561	-0.38027	0.704559	50	51	0.0183557	mdrs5
Summary.f0777	0.0787131	-1.26633	0.205646	778	391	0.01823	visitprp
Enrollment.f0095	0.0762435	-0.78453	0.433169	241	183	0.017658	fhx
HDCC.f0057	0.0761056	-0.602293	0.547512	152	106	0.0176261	momagesx
MMSE.f0305	0.0746987	0.469177	0.639478	62	131	0.0173002
SF.f0840	0.0739384	-0.64109	0.521946	153	154	0.0171241	life,vt01
CSRI.f0565	0.0733642	0.836421	0.403299	310	217	0.0169911	csri41
Scl90r.f2468	0.0729595	0.338236	0.73602	46	41	0.0168974	thostility_p
CSRI.f0494	0.0726351	0.670121	0.503263	144	179	0.0168223	csri12
CSRI.f0506	0.0718658	-0.809766	0.418443	306	218	0.0166441	csri16
PBAs.f0610	0.0706034	-0.577329	0.564095	93	253	0.0163518	basbehworst,pbas5wo
Behaviour.f0899	0.0704736	-0.945698	0.344569	602	257	0.0163217	anxisv
Enrollment.f0646	0.069686	-0.540678	0.589158	192	91	0.0161393
Physio.f0325	0.0694021	0.383182	0.702201	53	81	0.0160735	scst1
MMSE.f0315	0.0693012	0.444389	0.657262	63	131	0.0160501
SF.f0799	0.0678626	-0.46686	0.640887	301	56	0.015717	sf18
SF.f0846	0.0677323	-0.591186	0.554839	150	153	0.0156868	vt03,wornout
Behaviour.f0901	0.0667497	0.88291	0.377533	602	256	0.0154592	suicsv
HDCC.f0059	0.0667359	-0.501406	0.616549	149	91	0.015456	dadagesx
Enrollment.f0647	0.066641	0.540581	0.589225	192	91	0.0154341
SF.f0845	0.0665589	-0.588806	0.55643	152	153	0.015415	downheart,mh04
Medical.f0139	0.0659677	-0.523107	0.601266	80	238	0.0152781	cafab
SF.f0805	0.0655776	0.457279	0.647751	300	56	0.0151878	sf24
CSRI.f0583	0.0647175	-0.559684	0.576083	145	180	0.0149886	csri50
PBAs.f0330	0.0644237	-0.685899	0.493076	176	357	0.0149205	exfscore
SF.f0367	0.0641966	-0.734073	0.463226	219	317	0.0148679	re,re_nbs,resubscore
PBAs.f0355	0.0638722	-0.653177	0.513905	202	371	0.0147928	bashallfre,pbas10fr
Behaviour.f0903	0.0633067	0.842172	0.399928	599	255	0.0146618	aggrsv
CSSRS.f0272	0.063088	0.50074	0.617009	101	143	0.0146112	sbh2
CSRI.f0543	0.0621176	0.700936	0.483655	308	216	0.0143864	csri30
Behaviour.f0892	0.060915	0.53969	0.589794	156	160	0.0141079	behaviour_irascore
PBAs.f0349	0.0604538	-0.642394	0.520875	202	371	0.0140011	bashall,pbas10sv
Behaviour.f0896	0.0604206	0.782423	0.434197	561	244	0.0139934	guiltfr
SF.f0837	0.060193	0.532809	0.59455	155	155	0.0139407	extent,sf01
Medical.f0137	0.0592151	0.956441	0.339069	452	604	0.0137142	tobab
HDCC.f0062	0.0573642	0.692482	0.4889	364	243	0.0132855	ccdep,depression
Cognitive.f0238	0.0571481	-0.722332	0.4703	310	498	0.0132355	scnt2
PBAs.f0347	0.0570734	0.659809	0.509642	202	371	0.0132182	basdel,pbas9sv
PBAs.f0343	0.0569227	-0.627741	0.530434	185	367	0.0131833	baspersev,pbas7sv
HDCC.f0056	0.0563914	-0.678803	0.497523	368	239	0.0130602	momhd
PBAs.f0332	0.0554141	-0.632445	0.527349	202	371	0.0128339	basdeprfre,pbas1fr
CSRI.f0553	0.0551663	-0.616988	0.537515	305	213	0.0127765	csri35
PBAs.f0613	0.0547926	-0.447088	0.655093	93	253	0.01269	basobscompworst,pbas8wo
SF.f0800	0.0544961	0.372367	0.709842	301	55	0.0126213	sf19
PBAs.f0328	0.0537754	0.602597	0.547034	176	357	0.0124544	psyscore
MMSE.f0294	0.0516027	0.320983	0.748572	63	131	0.0119512
PBAs.f0615	0.0508804	0.460976	0.645107	93	253	0.0117839	bashallworst,pbas10wo
SF.f0849	0.050122	-0.444114	0.657274	154	154	0.0116083	interferesocial,sf02
CSRI.f0460	0.0492697	-0.302091	0.762961	70	98	0.0114109	csri1b
PBAs.f0359	0.0486043	0.453987	0.650097	130	252	0.0112568	bashousehold,pbahshd
Cognitive.f0242	0.0483113	-0.626549	0.531132	311	498	0.0111889	swrt2
HDCC.f0083	0.0476681	-0.512512	0.608536	257	211	0.0110399	sxestcfd
CSRI.f0509	0.0466475	-0.41178	0.680775	144	180	0.0108036	csri17
Cognitive.f0253	0.0465656	0.386696	0.699177	169	252	0.0107846	trlb2
Physio.f0323	0.0462746	0.268729	0.788555	55	80	0.0107172	tug1
PBAs.f0346	0.0459592	-0.506386	0.612785	191	371	0.0106441	basobscompfre,pbas8fr
CSSRS.f0275	0.0442006	0.351021	0.725878	101	143	0.0102369	sbh4
SF.f0810	0.0439018	0.300272	0.764147	298	56	0.0101677	sf29
CSRI.f0486	0.0428951	-0.196585	0.844621	37	50	0.00993451	csri9a
HDCC.f0072	0.0426296	-0.521235	0.602389	372	250	0.00987302	ccpsy,psychosis
Behaviour.f0895	0.0423421	0.567621	0.570441	602	257	0.00980643	deprsv
PBAs.f0326	0.0422198	0.481259	0.630531	176	357	0.0097781	depscore
SF.f0842	0.0417587	0.36832	0.712891	153	153	0.00967131	dumps,mh02
HADS.f0385	0.0416758	0.470157	0.638445	229	280	0.00965211	irrscore
Behaviour.f0918	0.0414032	0.545473	0.585575	581	249	0.00958898	deprexam
Behaviour.f0913	0.0412827	-0.559777	0.575778	602	257	0.00956107	hallucsv
SF.f0858	0.0408861	0.340721	0.73357	132	149	0.00946921	vt,vt_nbs
Behaviour.f0902	0.0400447	0.536859	0.591505	598	255	0.00927435	aggrfr
Care.f0886	0.039907	-0.390142	0.696622	303	136	0.00924247	crgvr23
CSRI.f0589	0.037784	-0.424711	0.671222	306	217	0.00875078	csri53
Cognitive.f0665	0.0372335	-0.269731	0.787634	106	104	0.00862327	mdrs
CSRI.f0464	0.0367576	0.414434	0.678727	306	217	0.00851305	csri3
SF.f0784	0.0365192	-0.248347	0.80401	299	56	0.00845784	sf3
PBAs.f0611	0.0362208	-0.299039	0.765092	92	252	0.00838875	basapathworst,pbas6wo
SF.f0783	0.035722	-0.235318	0.814098	301	56	0.00827322	sf2
SF.f0848	0.0342095	-0.299062	0.765097	153	153	0.00792291	tired,vt04
Behaviour.f0910	0.0337585	0.446549	0.655314	600	257	0.00781846	delusfr
Enrollment.f0098	0.0335366	-0.344105	0.730938	241	183	0.00776707
SF.f0381	0.0333934	0.230695	0.817757	65	167	0.00773391
PBAs.f0338	0.0332712	-0.377107	0.706234	202	371	0.00770561	basirritfre,pbas4fr
HADS.f0387	0.0330767	0.361109	0.718175	213	276	0.00766056	inwardirrscore,inwscore
PBAs.f0341	0.0326612	-0.37581	0.707198	201	370	0.00756433	basapath,pbas6sv
SF.f0786	0.0308741	-0.205208	0.837529	297	55	0.00715045	sf5
PBAs.f0327	0.0298093	-0.316779	0.751536	176	357	0.00690383	irascore
Physio.f0324	0.0293846	-0.172986	0.862914	56	85	0.00680549	scst
HADS.f0386	0.0291878	0.324477	0.745716	212	279	0.00675988	outscore,outwardirrscore
Cognitive.f0668	0.0286497	0.135068	0.892833	50	51	0.00663528	mdrs3
HADS.f0383	0.0284326	0.32087	0.748441	229	281	0.006585	anxscore
Behaviour.f0897	0.0280767	0.365857	0.714568	561	244	0.00650257	guiltsv
CSRI.f0491	0.0280123	-0.249362	0.803241	144	179	0.00648764	csri11
CSSRS.f0260	0.0272734	0.210819	0.833206	101	143	0.00631652	sid2
SF.f0362	0.0268948	-0.311427	0.755599	218	312	0.00622884	rp,rp_nbs,rpsubscore
CSRI.f0497	0.0254603	0.231361	0.817181	143	180	0.00589661	csri13
CSRI.f0483	0.0253794	-0.213223	0.83133	111	137	0.00587787	csri8a
Cognitive.f0236	0.0252845	-0.38569	0.699813	377	567	0.0058559	scnt
SF.f0815	0.0249599	-0.170642	0.864604	298	55	0.00578071	sf34
CSRI.f0559	0.0248078	-0.220697	0.825467	146	180	0.00574549	csri38
SF.f0843	0.0243033	0.213238	0.831284	154	153	0.00562864	calm,mh03
PBAs.f0331	0.0238421	0.278025	0.781094	202	371	0.00552182	basdepr,pbas1sv
SF.f0816	0.023798	-0.166897	0.867548	298	55	0.00551162	sf35
Cognitive.f0235	0.023798	-0.321306	0.748064	300	495	0.00551162	verfct7
SF.f0857	0.0234464	0.196706	0.844198	136	150	0.00543019	gh,gh_nbs
Behaviour.f0890	0.0233794	0.208555	0.834931	155	160	0.00541468	behaviour_depscore
CSRI.f0569	0.0230694	0.210397	0.83349	146	180	0.00534287	csri43
SF.f0804	0.0229636	-0.157822	0.874688	297	56	0.00531836	sf23
CSRI.f0461	0.0222621	0.251067	0.801861	305	218	0.0051559	csri2
SF.f0814	0.0219839	0.147937	0.882477	298	55	0.00509147	sf33
HDCC.f0058	0.0212355	0.250075	0.802618	354	228	0.00491814	dadhd
CSRI.f0473	0.0212179	-0.238589	0.811518	305	218	0.00491407	csri6
SF.f0841	0.0211572	0.18512	0.853258	154	153	0.0049	mh01,nervous
Cognitive.f0258	0.0210657	-0.282831	0.777384	311	451	0.00487882	verflt07
Cognitive.f0664	0.0205972	-0.116491	0.907462	59	61	0.00477032	hvlt5
PBAs.f0340	0.0205252	0.238139	0.811859	202	371	0.00475363	basbehfre,pbas5fr
Cognitive.f0660	0.0196867	0.109468	0.913015	59	62	0.00455945	hvlt1
Cognitive.f0247	0.0196393	-0.276036	0.782594	307	470	0.00454846	sit3
CSRI.f0459	0.0191457	0.121842	0.90317	71	99	0.00443414	csri1a
observed.aoo	0.0189721	-0.295463	0.767701	591	411	0.00439393
Enrollment.f0648	0.0185708	-0.139553	0.88912	183	82	0.00430099
CSSRS.f0270	0.0183421	0.141872	0.887299	101	143	0.00424803	sbh1
PBAs.f0345	0.0180353	0.203719	0.838647	191	371	0.00417697	basobscomp,pbas8sv
SF.f0859	0.0176579	-0.150316	0.880622	137	149	0.00408956	sf,sf_nbs
HDCC.f0076	0.0173893	0.17131	0.864067	234	165	0.00402735	cccogage,dementage
Behaviour.f0894	0.0172684	0.232158	0.81647	602	257	0.00399936	deprfr
factor.score.prod	0.0171612	0.386397	0.699242	1265	846	0.00397453
Scl90r.f2464	0.0153721	0.0649647	0.948385	39	34	0.00356018	tobsess_p
Cognitive.f0656	0.015317	0.0838949	0.933286	58	59	0.00354741	hvltd
CSSRS.f0277	0.0147105	-0.112641	0.910408	101	143	0.00340695	sbh5
SF.f0851	0.0145934	-0.127678	0.898488	153	154	0.00337983	gh03,healthy
CSRI.f0482	0.0145562	0.163997	0.869797	308	216	0.00337123	csri8
Cognitive.f0240	0.0142064	-0.22109	0.825068	403	584	0.0032902	stroop,swrt
Enrollment.f0096	0.0140129	-0.143191	0.886208	241	183	0.00324539
Behaviour.f0900	0.0139493	0.186836	0.851833	602	256	0.00323065	suicfr
MMSE.f0316	0.0134359	0.0872914	0.930531	63	131	0.00311175
SF.f0379	0.0132495	-0.0936463	0.925472	65	167	0.00306858
SF.f0847	0.0127879	0.112908	0.910178	153	152	0.00296167	happy,mh05
SF.f0803	0.0122513	-0.0842831	0.932879	299	56	0.0028374	sf22
SF.f0861	0.0121698	-0.103184	0.917891	134	148	0.00281853	mh,mh_nbs
Behaviour.f0904	0.0119691	-0.161702	0.871578	602	257	0.00277205	irritfr
CSRI.f0545	0.0118121	-0.133004	0.894242	307	216	0.00273568	csri31
Enrollment.f0093	0.0117057	0.154949	0.876905	516	201	0.00271104	rfstdy
CSRI.f0500	0.0109741	0.0984543	0.921633	144	180	0.0025416	csri14
SF.f0801	0.00855267	0.0584397	0.953431	301	55	0.0019808	sf20
CSSRS.f0273	0.00831535	-0.0636572	0.949296	101	143	0.00192583	sbh3
PBAs.f0336	0.00820569	0.0930958	0.92586	202	371	0.00190044	basanxfre,pbas3fr
SF.f0856	0.00820101	0.0693661	0.944747	137	149	0.00189935	bp,bp_nbs
PBAs.f0339	0.00714598	-0.0817812	0.934849	202	371	0.00165501	basbeh,pbas5sv
Behaviour.f0905	0.00680335	0.0916647	0.926986	602	257	0.00157566	irritsv
updmh	0.00626588	0.0748013	0.940396	213	426	0.00145118
CSRI.f0462	0.00618438	-0.0269601	0.978571	32	38	0.0014323	csri2a
Medical.f0136	0.00604627	-0.0584586	0.953413	181	220	0.00140032	alcunits
Cognitive.f0234	0.0059834	0.0863684	0.931195	300	495	0.00138576	verfct6
CSRI.f0488	0.00549788	0.0491373	0.96084	144	179	0.00127331	csri10
SF.f0850	0.00506227	-0.0444987	0.964536	154	155	0.00117242	gh02,sick
Cognitive.f0657	0.00395584	0.0211816	0.983137	58	62	0.000916173	hvltt11
Cognitive.f0239	0.00386943	-0.0540039	0.956945	310	498	0.000896161	scnt3
CSRI.f0536	0.0035826	-0.0402004	0.967949	302	216	0.000829731	csri26
Cognitive.f0228	0.00351502	0.0528682	0.957848	377	571	0.000814079	digit,sdmt
MMSE.f0321	0.00339514	-0.0221828	0.982325	63	131	0.000786314
SF.f0811	0.00227743	-0.0155873	0.987572	298	56	0.000527453	sf30
PBAs.f0337	0.0015541	-0.0178117	0.985795	202	371	0.00035993	basirrit,pbas4sv
SF.f0809	0.00128267	0.00898215	0.992838	299	56	0.000297066	sf28
Medical.f0141	0.00063805	0.0102717	0.991806	452	606	0.000147772	drugab
SF.f0781	0.000200728	-0.00140731	0.998878	297	55	4.64886e-05	sfscore_v1
Behaviour.f0911	9.07964e-05	-0.00122902	0.99902	600	257	2.10284e-05	delussv

## Sheet: cons_states_6_7
var	d	t_val	p_val	#samples_st6	#samples_st7	d_normalized	var_name
Motor.f0179	1.44763	-54.9137	0	3482	2458	0.413443	motorscore,motscore
Motor.f0180	1.44257	-54.534	0	3456	2443	0.411998	miscore
Functional.f0220	1.26981	46.7343	0	3189	2356	0.362658	fiscore
Functional.f0219	1.26358	45.7708	0	3092	2280	0.360879	fascore,functionscore
Functional.f0213	1.25223	47.2995	0	3414	2436	0.357637	functionalscore,tfcscore
Functional.f0221	1.23528	45.6596	0	3194	2360	0.352796	indepencescale,indepscl
Functional.f1252	1.18065	4.52754	2.76736e-05	34	30	0.337193	children,children_function,supchild,uhdrs49
Cognitive.f0654	1.10673	17.0867	8.99843e-60	1141	309	0.316082	cogscore
Motor.f2447	1.04328	-4.30745	5.52371e-05	37	32	0.297961	brady_tot
GCI.f0863	1.03942	-28.7712	3.62722e-163	2228	1185	0.29686	svrtyll
Functional.f0216	0.950944	35.8539	1.26724e-254	3415	2425	0.27159	chores,fcdomestic
Cognitive.f0229	0.934792	31.848	1.69619e-201	2572	2074	0.266976	sdmt_correct,sdmt1
Motor.f0209	0.933114	-35.6452	1.21537e-252	3523	2493	0.266497	gait
Functional.f0215	0.899938	34.1391	2.36344e-233	3464	2462	0.257022	fcfinances,finances,finances_tfc
Cognitive.f0241	0.897526	30.4947	2.80901e-186	2534	2096	0.256333	stroop_correct,swr_correct,swrt1
Cognitive.f0237	0.88884	30.1933	6.33674e-183	2525	2094	0.253853	scnt1
Functional.f0214	0.86906	32.8697	1.36336e-217	3415	2436	0.248203	fcoccupation,occupatn
oculo.score	0.861212	-32.9071	1.51515e-218	3533	2492	0.245962
PBAHD.f0736	0.819754	-5.20383	5.91177e-07	101	61	0.234122	pbal16fr
Motor.f0191	0.809186	-30.9244	5.13639e-195	3528	2495	0.231104	prosuphandsright,prosupr
Cognitive.f0245	0.79936	26.7007	7.02523e-146	2485	1997	0.228297	sit1
PBAHD.f0735	0.787154	-4.97851	1.64335e-06	101	61	0.224811	pbal16sv
Motor.f0192	0.766661	-29.3	1.5594e-176	3529	2494	0.218958	prosuphandsleft,prosupl
Motor.f0210	0.740026	-28.256	4.96324e-165	3521	2490	0.211351	tandem,tandemwalk
Motor.f2449	0.731866	-2.9508	0.00436376	37	32	0.209021	dystonia
Motor.f0187	0.729019	-27.8759	5.85849e-161	3534	2496	0.208208	dysarth,dysarthria
finger.score	0.728316	-27.8268	2.04219e-160	3528	2492	0.208007
Motor.f2450	0.727552	-3.01566	0.00362041	37	32	0.207789	chorea
CSRI.f0549	0.711338	-15.4853	4.29614e-51	1121	826	0.203158	csri33
Motor.f0182	0.711239	-27.1849	1.31976e-153	3533	2494	0.20313	ocularv,ocupursuitver
Motor.f0196	0.707497	-27.026	6.26328e-152	3532	2490	0.202061	bradkinbody,brady
brady.score	0.707497	-27.026	6.26328e-152	3532	2490	0.202061
Functional.f0217	0.690915	26.0047	3.68978e-141	3414	2425	0.197325	adl,fcadl
Cognitive.f0667	0.690677	6.50087	2.69243e-10	166	193	0.197257	mdrs2
Care.f0865	0.690367	-12.7349	2.46233e-35	967	522	0.197169	crgvr2
CSRI.f0551	0.68654	-14.9283	8.58076e-48	1121	827	0.196076	csri34
Motor.f0190	0.68011	-25.993	2.88539e-141	3530	2493	0.194239	fingertapsleft,fingtapl
Motor.f0186	0.676675	-25.8608	6.2394e-140	3534	2494	0.193258	sacvelocityver,sacvelv
dystonia.score	0.672639	-25.6537	7.95433e-138	3524	2491	0.192106
Motor.f0185	0.66925	-25.5808	4.14639e-137	3534	2494	0.191138	sacvelh,sacvelocityhor
Motor.f0189	0.668349	-25.5441	9.78947e-137	3530	2494	0.190881	fingertapsright,fingtapr
Motor.f0184	0.666722	-25.4892	3.43501e-136	3534	2494	0.190416	sacinitiationver,sacinitv
Functional.f1247	0.662606	2.68745	0.00923176	34	30	0.18924	emplany,employment,uhdrs44
Care.f0864	0.657167	-12.0896	3.66868e-32	967	521	0.187687	crgvr1
Motor.f0181	0.646639	-24.7149	1.55121e-128	3533	2494	0.18468	ocularh,ocupursuithor
WPAI.f0594	0.636545	-7.4264	3.97467e-13	224	362	0.181797	wpaiscr4
WPAI.f0600	0.636545	-7.4264	3.97467e-13	224	362	0.181797
Cognitive.f0249	0.630409	-12.7635	8.13948e-36	804	1045	0.180045	traila_time,trla1
SF.f0790	0.623642	7.16477	1.63292e-12	743	150	0.178112	sf9
Care.f0867	0.609118	-11.3214	1.46449e-28	967	521	0.173964	crgvr4
Cognitive.f0233	0.60732	16.9561	1.08972e-61	1293	1749	0.173451	verfct5
Motor.f0183	0.606726	-23.1973	4.26775e-114	3534	2494	0.173281	sacinith,sacinitiationhor
SF.f0854	0.595483	9.45723	2.08131e-20	554	474	0.17007	pf,pf_nbs
MMSE.f0291	0.590843	7.5993	8.24224e-14	284	527	0.168745	mmsetotal
Functional.f1253	0.583016	2.33133	0.0230018	34	30	0.166509	automobile,drive,uhdrs50
Motor.f0188	0.581378	-22.2168	3.60701e-105	3531	2493	0.166042	tongue,tonprotrusion
SF.f0789	0.57372	6.44264	1.91831e-10	743	151	0.163854	sf8
Care.f0866	0.570201	-10.5375	4.357e-25	967	518	0.162849	crgvr3
Motor.f0211	0.570062	-21.7467	5.38374e-101	3522	2483	0.16281	retpulltest,retropls
Motor.f0197	0.565246	-21.5828	1.42812e-99	3529	2493	0.161434	dysttrnk,maxdystrunk
Summary.f0778	0.563568	15.4044	8.14408e-52	2228	1188	0.160955	impwrsex
Motor.f0198	0.54385	-20.7617	1.56897e-92	3531	2493	0.155324	dystrue,maxdysrue
SF.f0794	0.539064	6.26573	5.77057e-10	742	151	0.153957	sf13
Motor.f0199	0.532244	-20.3152	8.47443e-89	3528	2493	0.152009	dystlue,maxdyslue
SF.f0821	0.530444	8.72504	9.76788e-18	592	503	0.151495	activitiesm,pf02
Motor.f0200	0.524912	-20.0311	1.83889e-86	3530	2492	0.149915	dystrle,maxdysrle
Motor.f0201	0.523609	-19.9796	4.84662e-86	3529	2492	0.149543	dystlle,maxdyslle
SF.f0788	0.522466	5.69636	1.66561e-08	738	149	0.149216	sf7
Functional.f1246	0.520535	2.13722	0.0365322	34	30	0.148665	employmentaccu,emplusl,uhdrs43
Functional.f2453	0.513099	-2.1233	0.0377271	34	30	0.146541	uhdrs80
SF.f0822	0.498963	8.17549	8.10929e-16	593	501	0.142504	lifting,pf03
SF.f0795	0.496925	5.8174	8.32926e-09	742	151	0.141922	sf14
CSRI.f0767	0.495018	-9.06093	4.0048e-19	931	544	0.141377
chorea.score	0.48155	-18.3909	1.55866e-73	3528	2493	0.137531
SF.f0820	0.472946	7.8277	1.16654e-14	593	504	0.135073	activitiesv,pf01
SF.f0369	0.470316	10.0702	2.84756e-23	858	1039	0.134322	pcs,pcsum
Care.f0868	0.464897	-8.65259	1.2919e-17	961	518	0.132775	crgvr5
SF.f0796	0.45666	5.49134	5.20264e-08	743	151	0.130422	sf15
SF.f0361	0.451838	10.0245	4.11371e-23	904	1106	0.129045	pf,pf_nbs,pfsubscore
Summary.f0779	0.448443	12.2581	7.74544e-34	2230	1185	0.128075	impwrssj
SF.f0826	0.446549	7.31914	4.83418e-13	592	500	0.127534	pf07,walkingm
Motor.f0203	0.444082	-16.9709	3.88006e-63	3532	2494	0.12683	chorbol,choreabol
SF.f0823	0.442916	7.25878	7.40994e-13	592	500	0.126497	climbings,pf04
Cognitive.f0225	0.440455	2.06324	0.0421413	43	44	0.125794	gen4
Cognitive.f0256	0.435579	14.3128	1.92201e-45	2452	1908	0.124401	verflt05
Motor.f0204	0.433389	-16.5626	2.75154e-60	3531	2496	0.123776	choreatrunk,chortrnk
SF.f0372	0.425572	6.19945	8.39982e-10	328	635	0.121543
Motor.f0202	0.420265	-16.0631	6.93285e-57	3531	2496	0.120028	choreaface,chorface
SF.f0825	0.416324	6.80647	1.64881e-11	591	500	0.118902	bending,pf06
SF.f0829	0.414889	6.75512	2.32094e-11	589	500	0.118492	bathing,pf10
Cognitive.f0252	0.414245	-8.67937	8.96206e-18	769	977	0.118308	trailb_time,trlb1
SF.f0827	0.412927	6.72821	2.77262e-11	593	496	0.117932	pf08,walkings
Physio.f0325	0.409649	4.76455	2.44967e-06	195	335	0.116996	scst1
CSRI.f0547	0.399611	-8.66283	9.48373e-18	1122	829	0.114129	csri32
SF.f0797	0.397039	4.66633	3.53626e-06	743	151	0.113394	sf16
Functional.f1270	0.397024	2.10776	0.0376032	68	32	0.11339	carehome,uhdrs67
Care.f0872	0.396093	-7.34109	3.48048e-13	962	521	0.113124	crgvr9
WPAI.f0595	0.395166	5.21962	2.4742e-07	232	370	0.112859
SF.f0373	0.395162	5.65086	2.10977e-08	326	626	0.112858
SF.f0828	0.394194	6.41475	2.10063e-10	591	498	0.112582	pf09,walkingo
Motor.f0193	0.393695	-15.049	2.85192e-50	3529	2495	0.112439	luria
SF.f0824	0.393392	6.40408	2.24794e-10	590	498	0.112353	climbingo,pf05
Cognitive.f0223	0.392249	-1.83819	0.0695277	43	44	0.112026	gen2
SF.f0793	0.379592	4.36155	1.44234e-05	741	152	0.108412	sf12
SF.f0791	0.372101	4.21873	2.70852e-05	741	151	0.106272	sf10
CSRI.f0516	0.365565	-3.00374	0.00288272	108	206	0.104405	csri19a
CSRI.f0775	0.36476	-4.49273	8.33512e-06	287	359	0.104176	csri60__1
Motor.f0206	0.364664	-13.9355	1.81126e-43	3532	2495	0.104148	chorealue,chorlue
rigidity.score	0.363723	-13.8936	3.20335e-43	3530	2492	0.103879
Care.f0871	0.360275	-6.65124	4.07534e-11	966	519	0.102894	crgvr8
CareQoL.f0421	0.359511	3.62525	0.000322053	159	288	0.102676
SF.f0792	0.35826	4.15638	3.54478e-05	742	152	0.102319	sf11
Motor.f2446	0.356516	-1.48477	0.142295	37	32	0.101821	oculo
Cognitive.f0658	0.356056	3.76927	0.000185629	224	226	0.10169	hvltt21
Motor.f0205	0.355852	-13.5984	1.66965e-41	3532	2495	0.101631	chorearue,chorrue
SF.f0375	0.355599	5.11422	3.80806e-07	325	630	0.101559
PBAHD.f0766	0.355393	-2.24421	0.0261901	101	61	0.1015	pbal31fr
PBAHD.f0746	0.3503	-2.19004	0.0299688	101	61	0.100046	pbal21fr
Motor.f0194	0.349501	-13.3535	4.18185e-40	3531	2493	0.0998175	rigarmr,rigarmsright
Motor.f0195	0.346919	-13.2535	1.53452e-39	3531	2493	0.0990799	rigarml,rigarmsleft
Care.f0869	0.345937	-6.40379	2.03099e-10	961	520	0.0987995	crgvr6
PBAs.f0329	0.34436	-7.43777	1.48959e-13	806	1274	0.0983493	aptscore
CSRI.f0466	0.335432	-1.86205	0.0642828	62	114	0.0957993	csri3b
CSRI.f0537	0.335353	6.81579	1.39927e-11	650	726	0.0957769	csri27
Motor.f0207	0.325539	-12.4399	4.27125e-35	3530	2495	0.0929738	chorearle,chorrle
Physio.f0323	0.325509	-3.15664	0.00168868	192	329	0.0929654	tug1
CSRI.f0515	0.323557	-7.06272	2.2588e-12	1127	835	0.0924077	csri19
CSRI.f0485	0.321021	-7.02191	3.004e-12	1130	836	0.0916836	csri9
MMSE.f0320	0.320996	3.88058	0.000112657	284	530	0.0916764
SF.f0831	0.319035	5.21057	2.25442e-07	588	493	0.0911164	physicacc,rp02
PBAHD.f0765	0.318434	-1.99718	0.0475014	101	61	0.0909447	pbal31sv
Functional.f0218	0.318021	11.9474	1.60066e-32	3414	2425	0.0908269	carelevl,fccarelevel
CSRI.f0774	0.313443	4.52022	7.25716e-06	316	383	0.0895192	csri59
MMSE.f0309	0.311813	4.22449	2.66509e-05	285	532	0.0890537
MMSE.f0307	0.31099	4.2025	2.93089e-05	286	533	0.0888186
SF.f0371	0.310407	-4.47214	8.66853e-06	327	636	0.0886523
Motor.f0208	0.310286	-11.8574	4.46823e-32	3531	2495	0.0886176	chorealle,chorlle
SF.f0855	0.309214	4.95066	8.63073e-07	560	477	0.0883115	rp,rp_nbs
HDCC.f0068	0.308142	-7.07387	2.02505e-12	1271	899	0.0880052	apathy,ccapt
MMSE.f0315	0.306127	3.9695	7.83551e-05	285	535	0.0874298
CareQoL.f0415	0.305969	2.96229	0.0032202	155	284	0.0873846
PBAHD.f0748	0.304434	-1.90153	0.0590297	101	61	0.0869463	pbal22fr
SF.f0800	0.304128	3.37709	0.000764404	739	151	0.086859	sf19
SF.f0374	0.297949	4.24468	2.4022e-05	327	632	0.0850941
Behaviour.f0917	0.296364	-7.45183	1.2257e-13	1854	900	0.0846414	dement
Cognitive.f0253	0.294542	5.51439	4.04463e-08	722	962	0.0841212	trlb2
CSRI.f0465	0.294355	2.21141	0.0283026	62	115	0.0840678	csri3a
SF.f0832	0.293426	4.78546	1.94353e-06	588	491	0.0838025	physiclimit,rp03
SF.f0781	0.293356	3.18965	0.00147609	718	143	0.0837826	sfscore_v1
SF.f0801	0.293107	3.25452	0.00117879	739	151	0.0837115	sf20
MMSE.f0321	0.292234	3.91962	9.6127e-05	285	533	0.0834619
Cognitive.f1214	0.291727	-1.31272	0.192811	57	30	0.0833172	smell_pct,upsitresponses
PBAs.f0342	0.290655	-6.47391	1.18069e-10	848	1294	0.083011	basapathfre,pbas6fr
CSRI.f0493	0.288082	1.90349	0.0589044	77	74	0.0822763	csri11b
CareQoL.f0404	0.28775	2.8499	0.00457683	158	288	0.0821815
CSRI.f0486	0.286276	-2.82544	0.00495341	153	257	0.0817604	csri9a
Cognitive.f0660	0.28535	3.05034	0.00242144	224	226	0.081496	hvlt1
Care.f0875	0.284298	-5.27394	1.53265e-07	964	522	0.0811956	crgvr12
CSRI.f0770	0.284152	-1.49176	0.137387	165	31	0.0811539	csri57
SF.f0830	0.28227	4.61426	4.41676e-06	590	494	0.0806162	physiccut,rp01
Cognitive.f0659	0.281351	2.9832	0.00300833	224	226	0.0803539	hvltt31
Care.f0873	0.281269	-5.16536	2.72709e-07	959	520	0.0803304	crgvr10
Functional.f1261	0.276174	1.46618	0.145801	68	32	0.0788751	bathe,uhdrs58
Cognitive.f0664	0.275602	-2.88414	0.00411746	221	221	0.0787118	hvlt5
MMSE.f0310	0.27383	3.61934	0.000313513	285	535	0.0782059
CSRI.f0518	0.273558	-4.8442	1.41557e-06	650	724	0.0781283	csri20
CareQoL.f0445	0.272701	-2.66133	0.00806598	158	287	0.0778834
Functional.f1273	0.272578	1.0707	0.288453	34	30	0.0778484	fcinfosource,tfcsrc,uhdrs75
PBAs.f0341	0.271975	-6.08558	1.37153e-09	848	1294	0.0776759	basapath,pbas6sv
CareQoL.f0418	0.266257	2.67588	0.00772843	159	288	0.0760431
Enrollment.f0645	0.265523	-3.88753	0.000109119	593	263	0.0758333
PBAHD.f0747	0.262534	-1.63832	0.103321	101	61	0.0749798	pbal22sv
SF.f0833	0.262084	4.27677	2.06446e-05	588	492	0.0748511	physicdiff,rp04
Functional.f1255	0.261939	1.24712	0.215326	68	32	0.0748099	laundry,uhdrs52
PBAs.f0611	0.261684	-4.38796	1.23479e-05	417	913	0.0747369	basapathworst,pbas6wo
CareQoL.f0409	0.260522	2.51823	0.0121462	156	289	0.0744051
CareQoL.f0442	0.259478	-2.57822	0.0102559	157	284	0.074107
CSRI.f0552	0.258854	-1.8303	0.0678942	115	319	0.0739287	csri34a
Care.f0882	0.257827	-4.78286	1.90148e-06	958	516	0.0736354	crgvr19
SF.f0862	0.256116	3.87937	0.000112106	508	424	0.0731468	sfscore
PBAHD.f0763	0.250457	1.48402	0.139796	101	59	0.0715305	pbal30sv
PBAHD.f0764	0.250457	1.48402	0.139796	101	59	0.0715305	pbal30fr
MMSE.f0308	0.249181	3.36611	0.000798055	285	532	0.0711662
CareQoL.f0454	0.249029	2.66199	0.00805985	154	277	0.0711227
HDCC.f0070	0.248814	-5.71336	1.26002e-08	1273	900	0.0710611	ccpob,obsessive
Cognitive.f0666	0.247595	2.2333	0.0261481	166	193	0.0707131	mdrs1
CareQoL.f0455	0.244756	2.4175	0.0160415	156	277	0.0699024
PBAHD.f0709	0.242711	1.47962	0.140941	101	61	0.0693183	pbal3sv
PBAHD.f0740	0.240839	-1.48621	0.139205	101	60	0.0687836	pbal18fr
Motor.f0212	0.239684	-9.10888	1.12423e-19	3346	2465	0.0684537	diagconf
CareQoL.f0423	0.238701	-2.41155	0.0162887	159	288	0.068173
CareQoL.f0450	0.236814	2.37273	0.018088	156	284	0.067634
Care.f0876	0.236686	-4.41525	1.08219e-05	961	520	0.0675976	crgvr13
MMSE.f0295	0.236194	2.91063	0.00370476	286	535	0.0674571
PBAHD.f0742	0.234345	-1.45396	0.147929	101	60	0.0669288	pbal19fr
emplnrsn	0.233208	4.55819	5.582e-06	794	696	0.0666043
Cognitive.f0657	0.23036	2.45123	0.0146179	224	226	0.0657909	hvltt11
PBAHD.f0710	0.229052	1.39642	0.164523	101	61	0.0654172	pbal3fr
CSRI.f0506	0.227341	-4.95569	7.82703e-07	1128	833	0.0649287	csri16
SF.f0368	0.226003	-5.08074	4.10777e-07	903	1107	0.0645465	mh,mh_nbs,mhsubscore
CareQoL.f0425	0.222967	2.24273	0.0254072	159	287	0.0636793
PBAs.f0616	0.222908	-3.56757	0.000373103	418	914	0.0636626	basorientworst,pbas11wo
PBAs.f0357	0.222032	-4.78957	1.7859e-06	848	1294	0.0634124	basorientfre,pbas11fr
CSRI.f0562	0.221725	0.962111	0.339127	31	45	0.0633245	csri39a
PBAHD.f0745	0.221502	-1.37413	0.171322	101	61	0.0632611	pbal21sv
Cognitive.f0656	0.219548	-2.23823	0.0257369	212	204	0.0627028	hvltd
SF.f0382	0.219467	3.13674	0.00176076	324	631	0.0626798
CSRI.f0557	0.218518	-3.88168	0.000108678	646	725	0.0624088	csri37
Cognitive.f0251	0.217929	-4.21028	2.67658e-05	779	1020	0.0622407	triala_error,trla3
Cognitive.f0665	0.216853	-3.12185	0.00185929	436	398	0.0619332	mdrs
MMSE.f0306	0.216585	2.9589	0.00317631	286	535	0.0618567
Physio.f0324	0.216512	2.1208	0.0343895	197	350	0.0618358	scst
CSRI.f0567	0.216273	-3.62033	0.000304948	647	725	0.0617674	csri42
CareQoL.f0413	0.215954	2.07718	0.0383624	155	289	0.0616765
Care.f0877	0.215758	-3.97361	7.41994e-05	962	520	0.0616206	crgvr14
CSRI.f0579	0.215694	-3.74102	0.000190828	649	726	0.0616021	csri48
HDCC.f0073	0.215496	-1.60476	0.109974	115	108	0.0615457	ccpsyage,psychage
MMSE.f0311	0.214779	2.93449	0.00343447	285	535	0.0613409
Behaviour.f0906	0.213884	-5.39282	7.50622e-08	1920	922	0.0610852	obsessfr
MMSE.f0317	0.213793	2.53328	0.0114859	285	535	0.0610594
PBAs.f0344	0.213364	-4.66436	3.2922e-06	813	1273	0.0609367	baspersevfre,pbas7fr
Cognitive.f0661	0.211327	2.31366	0.0211382	224	226	0.0603551	hvlt2
Care.f0870	0.210109	-3.87098	0.000113119	961	520	0.0600071	crgvr7
Behaviour.f0907	0.209144	-5.27474	1.4294e-07	1921	921	0.0597315	obsesssv
CareQoL.f0453	0.207814	2.0774	0.0383416	159	285	0.0593517
CSRI.f0487	0.207782	2.2826	0.0229818	144	255	0.0593425	csri9b
Cognitive.f0669	0.206581	1.97263	0.0493065	166	194	0.0589994	mdrs4
CSRI.f0464	0.204399	-4.46272	8.5511e-06	1129	837	0.0583764	csri3
SF.f0857	0.204217	3.29621	0.00101305	557	487	0.0583244	gh,gh_nbs
MMSE.f0301	0.20236	2.6128	0.00914511	286	535	0.057794
PBAs.f0356	0.199775	-4.33602	1.51813e-05	848	1296	0.0570558	basorient,pbas11sv
Care.f0881	0.199629	-3.62931	0.000294134	943	497	0.0570141	crgvr18
CareQoL.f0420	0.199383	-2.01313	0.044704	159	287	0.0569438
Care.f0874	0.198897	-3.66541	0.000255649	963	522	0.0568051	crgvr11
MHx.f0105	0.198557	-1.5826	0.114738	125	135	0.056708	hxtobyos,smokyears
CareQoL.f0427	0.198491	2.02365	0.0436078	158	286	0.056689
PBAs.f0343	0.197028	-4.34931	1.43109e-05	820	1280	0.0562713	baspersev,pbas7sv
PBAHD.f0714	0.196725	1.20031	0.231795	101	61	0.0561846	pbal5fr
CSSRS.f0262	0.196006	1.24144	0.216308	77	81	0.0559794	sid4
PBAHD.f0739	0.195272	-1.19897	0.232324	101	60	0.0557697	pbal18sv
Motor.f2448	0.194647	-0.803317	0.424632	37	32	0.055591	rigidity
CSRI.f0539	0.191676	4.21467	2.61543e-05	1124	832	0.0547428	csri28
CSRI.f0503	0.191582	3.7704	0.000169896	650	727	0.0547158	csri15
MMSE.f0296	0.191151	2.51987	0.0119291	286	535	0.0545928
CSRI.f0773	0.190765	-2.51688	0.0120646	316	379	0.0544825	csri58
Enrollment.f0099	0.190635	2.01482	0.044428	254	278	0.0544453
CSRI.f0467	0.190435	-3.27376	0.0010876	651	729	0.0543883	csri4
HDCC.f0066	0.190372	-4.36897	1.30714e-05	1275	898	0.0543702	ccvab,violent
Care.f0883	0.187672	-3.46212	0.000551189	963	520	0.0535992	crgvr20
CareQoL.f0444	0.187493	-1.8678	0.0624501	157	288	0.053548
CareQoL.f0432	0.187161	1.87452	0.061519	158	285	0.0534531
HDCC.f0067	0.186869	-2.54991	0.0109747	389	356	0.0533697	ccvabage,violentage
SF.f0851	0.186394	-3.04851	0.00235587	585	495	0.0532341	gh03,healthy
CareQoL.f0408	0.186193	1.84024	0.0663984	157	290	0.0531768
CareQoL.f0457	0.185724	1.13361	0.258688	65	94	0.0530429
Behaviour.f0916	0.185358	-4.71671	2.5163e-06	1857	901	0.0529384	confus
CareQoL.f0441	0.184049	-1.84409	0.0658432	158	283	0.0525643
Care.f0878	0.184033	-3.41211	0.000661971	963	521	0.0525599	crgvr15
SF.f0380	0.183664	-2.63667	0.00850893	323	630	0.0524543
SF.f0362	0.183292	4.12005	3.94095e-05	908	1112	0.0523482	rp,rp_nbs,rpsubscore
PBAs.f0330	0.182117	-3.92999	8.77414e-05	803	1267	0.0520127	exfscore
MMSE.f0292	0.180946	2.27644	0.0230768	286	535	0.0516782
MMSE.f0305	0.179702	2.31541	0.0208369	286	535	0.0513229
CSRI.f0575	0.17958	-3.89206	0.000102727	1126	832	0.051288	csri46
Care.f0886	0.179218	-3.33756	0.000866112	963	522	0.0511847	crgvr23
PBAHD.f0753	0.178508	-1.10657	0.270141	101	61	0.0509818	pbal25sv
Physio.f0322	0.177944	1.82897	0.0679503	197	350	0.0508208	tug
Care.f0887	0.176431	-3.26137	0.00113398	961	521	0.0503887	crgvr24
CSRI.f0776	0.175619	1.84725	0.0653795	211	233	0.0501568	csri60__2
PBAHD.f0720	0.175085	1.0737	0.284574	101	61	0.0500043	pbal8fr
CareQoL.f0436	0.174925	1.7634	0.0785234	158	286	0.0499586
MMSE.f0318	0.174496	2.16893	0.0303756	285	535	0.0498361
MMSE.f0294	0.173879	2.11863	0.0344219	286	535	0.04966
SF.f0835	0.172278	2.80737	0.00508444	588	496	0.0492027	emotionacc,re02
SF.f0841	0.171485	-2.80271	0.0051577	590	497	0.048976	mh01,nervous
MHx.f0107	0.171032	3.09387	0.00201479	858	542	0.0488468	druguse,hxdrugab
PBAHD.f0761	0.170254	1.00621	0.315872	101	57	0.0486245	pbal29sv
PBAHD.f0762	0.170254	1.00621	0.315872	101	57	0.0486245	pbal29fr
SF.f0814	0.16759	1.9244	0.0546274	734	147	0.0478638	sf33
PBAHD.f0705	0.16711	1.0321	0.303581	101	61	0.0477266	pbal1sv
PBAHD.f0741	0.166256	-1.02751	0.30574	101	60	0.0474827	pbal19sv
Behaviour.f0895	0.164802	4.10842	4.09612e-05	1926	924	0.0470676	deprsv
SF.f0799	0.16464	1.83661	0.066602	739	151	0.0470212	sf18
CSSRS.f0269	0.162815	1.2465	0.213816	117	121	0.0464999	int6
CSRI.f0543	0.162746	3.58135	0.000350183	1122	832	0.0464801	csri30
CareQoL.f0435	0.162005	1.62796	0.104247	159	285	0.0462687
SF.f0836	0.16121	2.62206	0.00886281	588	495	0.0460417	emotioncare,re03
SF.f0815	0.160723	1.77703	0.0759087	733	147	0.0459026	sf34
PBAHD.f0706	0.160626	0.990764	0.323297	101	61	0.0458746	pbal1fr
CSRI.f0559	0.159073	-2.74742	0.00608527	647	726	0.0454314	csri38
PBAs.f0614	0.158918	-2.40394	0.0163561	418	910	0.0453871	basdelworst,pbas9wo
PBAs.f0612	0.15886	-2.56115	0.0105468	389	890	0.0453703	pbas7wo
SF.f0860	0.157962	2.53158	0.0115005	562	487	0.045114	re,re_nbs
CareQoL.f0456	0.157022	1.57714	0.115502	155	275	0.0448454
Behaviour.f0891	0.156877	-2.73892	0.00625241	658	585	0.044804	defscore
PBAHD.f0707	0.156857	0.967954	0.334528	101	61	0.0447985	pbal2sv
SF.f0852	0.15596	2.56246	0.0105279	585	499	0.0445422	gh04,worse
PBAs.f0335	0.154803	3.53263	0.000420155	849	1296	0.0442118	basanx,pbas3sv
SF.f0819	0.154266	-2.54599	0.0110324	595	506	0.0440584	compared,ht
HADS.f0384	0.154149	-3.33776	0.000860544	922	1019	0.0440249	depscore,hads_depscore
CSRI.f0484	0.153917	2.47659	0.0134433	421	501	0.0439587	csri8b
SF.f0844	0.15385	-2.53351	0.0114309	595	504	0.0439395	energy,energy_sf36,vt02
PBAs.f0608	0.153849	2.6272	0.00870793	418	914	0.0439392	basanxworst,pbas3wo
CSRI.f0463	0.15371	-1.09927	0.272826	106	121	0.0438997	csri2b
Functional.f1249	0.153268	0.83664	0.404417	76	49	0.0437733	fafinan,finances,finances_function,uhdrs46
PBAHD.f0719	0.152489	0.938505	0.3494	101	61	0.0435508	pbal8sv
Behaviour.f0915	0.151652	-3.80442	0.00014513	1925	922	0.0433118	apathsv
HDCC.f0071	0.149957	-2.42934	0.0152921	555	503	0.0428277	ccpobage,obsessage
Behaviour.f0894	0.149927	3.7415	0.000186534	1926	924	0.0428191	deprfr
SF.f0853	0.149686	-2.44929	0.0144718	585	497	0.0427503	excellent,gh05
HDCC.f0064	0.149506	-3.44058	0.000591404	1277	904	0.042699	ccirb,irritability
Behaviour.f0896	0.149491	3.61652	0.000304011	1842	882	0.0426946	guiltfr
Behaviour.f0897	0.148348	3.59513	0.000329984	1842	882	0.0423682	guiltsv
Cognitive.f0228	0.148183	3.9595	7.67255e-05	1402	1830	0.042321	digit,sdmt
PBAHD.f0712	0.147938	-0.916069	0.361009	101	61	0.0422512	pbal4fr
Cognitive.f0248	0.147769	3.3724	0.000757826	921	1320	0.0422028	trl
CareQoL.f0394	0.145327	1.41873	0.156677	158	290	0.0415053
PBAHD.f0754	0.145295	-0.901727	0.368557	101	61	0.0414963	pbal25fr
Medical.f0136	0.145061	-2.47955	0.0132939	590	589	0.0414293	alcunits
SF.f0858	0.144771	2.3193	0.0205719	560	482	0.0413466	vt,vt_nbs
PBAHD.f0708	0.144732	0.894151	0.372584	101	61	0.0413356	pbal2fr
SF.f0817	0.14282	1.57547	0.11551	728	147	0.0407893	sf36
CSRI.f0571	0.141741	-3.05316	0.00229495	1125	831	0.0404814	csri44
Enrollment.f0648	0.141004	-1.8289	0.0677779	574	246	0.0402707
SF.f0798	0.140667	1.57882	0.114734	739	151	0.0401745	sf17
CSRI.f0577	0.140454	-3.05372	0.00229069	1125	832	0.0401137	csri47
HDCC.f0057	0.139966	-1.98483	0.047488	512	331	0.0399743	momagesx
Behaviour.f0890	0.139409	2.46652	0.0137776	658	585	0.0398152	behaviour_depscore
Behaviour.f0914	0.138504	-3.47056	0.000527095	1925	922	0.0395568	apathfr
CareQoL.f0389	0.13705	-1.78753	0.0745285	159	290	0.0391414
Cognitive.f0244	0.136824	3.71689	0.000205109	1400	1832	0.0390769	sit
CSRI.f0459	0.136648	-1.90664	0.0569069	400	444	0.0390266	csri1a
MHx.f0106	0.135822	-1.6596	0.0974967	387	239	0.0387907	hxpacky
CareQoL.f0419	0.135276	-1.36604	0.172618	159	288	0.0386347
PBAHD.f0756	0.135055	0.828336	0.408714	101	61	0.0385717	pbal26fr
CSRI.f0561	0.13483	-2.93435	0.00338148	1122	831	0.0385074	csri39
CareQoL.f0438	0.134469	-1.33652	0.182073	154	287	0.0384044
SF.f0783	0.134281	1.50899	0.131653	746	152	0.0383507	sf2
PBAHD.f0755	0.133522	0.818499	0.41429	101	61	0.038134	pbal26sv
SF.f0377	0.132377	1.90672	0.0568608	321	625	0.0378068
Cognitive.f0255	0.132121	3.63079	0.000286935	1403	1831	0.0377337	verflt
Functional.f1271	0.131731	-0.526104	0.600693	34	30	0.0376223	fasrc,funcassfrom,uhdrs68
HADS.f0383	0.130699	2.8752	0.00408176	921	1020	0.0373276	anxscore
CareQoL.f0412	0.130674	1.29936	0.194493	157	290	0.0373206
CSSRS.f0263	0.130476	-0.811846	0.418117	77	81	0.0372638	sid5
CareQoL.f0451	0.130456	1.30321	0.19318	159	286	0.0372583
Cognitive.f0231	0.130166	-3.8139	0.000139404	1365	1799	0.0371755	verfct
Care.f0879	0.129751	-2.39041	0.0169545	957	520	0.0370568	crgvr16
updhdh	0.129354	-2.86689	0.00418389	837	1415	0.0369435
PBAHD.f0738	0.129068	-0.799352	0.425271	101	61	0.0368618	pbal17fr
SF.f0370	0.128943	-2.78626	0.00538513	858	1039	0.036826	mcs,mcsum
HADS.f0385	0.128517	2.8262	0.00475858	921	1022	0.0367046	irrscore
CSRI.f0563	0.127973	-2.78093	0.00547236	1122	831	0.036549	csri40
SF.f0803	0.127646	1.40886	0.159229	739	145	0.0364556	sf22
CareQoL.f0447	0.127456	-1.25467	0.210264	157	286	0.0364014
CSRI.f0512	0.126832	-2.2611	0.0239091	650	726	0.0362231	csri18
Behaviour.f0904	0.125583	3.13262	0.00175025	1913	924	0.0358665	irritfr
CSRI.f0550	0.12508	-1.24758	0.212737	167	363	0.0357229	csri33a
CSRI.f0509	0.12242	-2.20449	0.0276554	650	726	0.034963	csri17
PBAHD.f0732	0.121672	0.751822	0.453263	101	61	0.0347494	pbal14fr
SF.f0785	0.121588	-1.3417	0.180035	746	152	0.0347256	sf4
SF.f0834	0.121473	1.9851	0.0473847	589	498	0.0346927	emotioncut,re01
CareQoL.f0417	0.121015	1.22936	0.219587	159	287	0.0345619
Enrollment.f0647	0.120384	1.69631	0.0901924	593	262	0.0343816
HDCC.f0062	0.119998	-2.75192	0.0059741	1270	897	0.0342714	ccdep,depression
PBAHD.f0751	0.119935	-0.744624	0.457591	101	61	0.0342534	pbal24sv
PBAHD.f0737	0.119639	-0.740278	0.460216	101	61	0.034169	pbal17sv
MMSE.f0300	0.119158	1.55233	0.12097	286	535	0.0340315
CareQoL.f0416	0.118979	1.21024	0.226832	159	285	0.0339805
Summary.f0777	0.118636	-3.30313	0.000965906	2242	1192	0.0338823	visitprp
CSRI.f0583	0.118433	-2.08541	0.0372161	648	727	0.0338245	csri50
PBAHD.f0752	0.117854	-0.731178	0.46574	101	61	0.033659	pbal24fr
SF.f0806	0.117796	-1.33158	0.183344	734	150	0.0336425	sf25
HADS.f0386	0.117015	2.55008	0.0108472	899	1018	0.0334194	outscore,outwardirrscore
CareQoL.f0396	0.116296	1.39466	0.163844	150	279	0.033214
PBAHD.f0713	0.116086	0.713185	0.47677	101	61	0.033154	pbal5sv
PBAHD.f0757	0.116085	-0.731091	0.465793	101	61	0.0331539	pbal27sv
PBAHD.f0758	0.116085	-0.731091	0.465793	101	61	0.0331539	pbal27fr
Behaviour.f0905	0.115775	2.89404	0.00383226	1914	924	0.0330654	irritsv
SF.f0376	0.115409	1.66598	0.0960446	325	633	0.0329609
SF.f0840	0.11366	-1.86292	0.062743	590	501	0.0324613	life,vt01
CareQoL.f0437	0.113199	1.16747	0.243646	158	288	0.0323297
Care.f0880	0.113128	-2.06359	0.0392358	936	507	0.0323092	crgvr17
HDCC.f0081	0.112802	2.59196	0.0096053	1347	891	0.0322162	raterestimate,sxest
PBAHD.f0729	0.112075	0.69223	0.489796	101	61	0.0320085	pbal13sv
PBAHD.f0711	0.111357	-0.687637	0.492677	101	61	0.0318037	pbal4sv
SF.f0861	0.11043	-1.76489	0.0778786	556	476	0.0315388	mh,mh_nbs
MMSE.f0312	0.110151	1.50443	0.132858	285	535	0.0314592
SF.f0784	0.109422	1.23429	0.21742	746	151	0.0312509	sf3
Cognitive.f0655	0.108461	-1.56542	0.117864	436	398	0.0309764	hvlt
Care.f0885	0.108454	-1.99409	0.0463253	959	521	0.0309744	crgvr22
Cognitive.f0258	0.1075	2.84991	0.00440481	1248	1577	0.0307021	verflt07
HADS.f0387	0.107146	2.34091	0.0193389	902	1017	0.0306009	inwardirrscore,inwscore
Medical.f0135	0.106676	3.21172	0.00133104	1668	1941	0.0304668	alcab
Behaviour.f0909	0.105647	-2.65332	0.00801517	1899	919	0.0301729	compulsv
CSRI.f0508	0.105632	-0.562442	0.57456	66	105	0.0301686	csri16b
CSRI.f0488	0.10481	-1.92079	0.054965	649	726	0.0299338	csri10
Care.f0884	0.10459	-1.92429	0.0545097	961	520	0.0298708	crgvr21
CareQoL.f0422	0.102774	1.04824	0.295097	158	288	0.0293521
CSRI.f0569	0.102298	-1.7894	0.0737707	647	724	0.0292164	csri43
Medical.f0137	0.100989	3.04805	0.00231999	1670	1947	0.0288423	tobab
CareQoL.f0407	0.100941	1.00047	0.317627	157	290	0.0288287
Behaviour.f0908	0.100133	-2.50973	0.012138	1899	919	0.0285981	compulfr
Behaviour.f0902	0.0998541	2.48055	0.0131758	1911	920	0.0285183	aggrfr
CSRI.f0483	0.0996392	-1.49262	0.135878	425	503	0.028457	csri8a
CareQoL.f0405	0.099576	-1.01715	0.309647	156	281	0.0284389
CSSRS.f0922	0.0990051	-0.891524	0.37313	198	249	0.0282758	sbh7
Enrollment.f0100	0.0989994	1.12954	0.259181	254	278	0.0282742
PBAs.f0606	0.0988784	1.66417	0.0963139	418	914	0.0282397	basdeprworst,pbas1wo
CareQoL.f0406	0.098616	0.983185	0.32605	159	289	0.0281647
PBAs.f0615	0.0985017	-1.51659	0.129608	418	911	0.0281321	bashallworst,pbas10wo
Cognitive.f0662	0.0977979	1.03064	0.303267	223	226	0.0279311	hvlt3
PBAs.f0358	0.0974322	2.25038	0.0245249	864	1305	0.0278266	basrelative,pbainfo
SF.f0843	0.0973425	1.59177	0.111728	587	497	0.027801	calm,mh03
Behaviour.f0921	0.0973161	-2.41596	0.0157568	1913	920	0.0277935	isobt
PBAHD.f0731	0.0964564	0.596787	0.551493	101	61	0.027548	pbal14sv
CareQoL.f0395	0.0961995	0.938715	0.348393	157	284	0.0274746
PBAs.f0328	0.0957573	-1.93091	0.0536308	805	1270	0.0273483	psyscore
PBAs.f0613	0.0947491	-1.55045	0.121272	418	914	0.0270603	basobscompworst,pbas8wo
HDCC.f0072	0.0942647	-2.16849	0.0302293	1278	905	0.026922	ccpsy,psychosis
Medical.f0138	0.0923956	-1.28581	0.198834	471	449	0.0263882	packy
PBAs.f0336	0.0922473	2.07701	0.0379194	849	1296	0.0263458	basanxfre,pbas3fr
SF.f0818	0.0921994	-1.52593	0.127312	600	511	0.0263322	general,general_sf36,gh01
Behaviour.f0920	0.0920658	-2.27736	0.022841	1849	900	0.026294	irritrfr
PBAs.f0331	0.091704	2.08283	0.0373848	849	1295	0.0261907	basdepr,pbas1sv
PBAs.f0338	0.0909805	2.06725	0.0388302	849	1296	0.025984	basirritfre,pbas4fr
CSRI.f0546	0.0906439	-1.03752	0.299983	237	279	0.0258879	csri31a
CareQoL.f0429	0.0902479	-0.910452	0.363076	159	289	0.0257748
SF.f0848	0.0899855	1.46883	0.142168	588	498	0.0256999	tired,vt04
SF.f0808	0.0887088	1.00272	0.316269	739	150	0.0253352	sf27
CSSRS.f0259	0.0886542	1.45475	0.146032	483	585	0.0253196	sid1
CSRI.f0587	0.0880876	-1.54252	0.123179	648	727	0.0251578	csri52
PBAHD.f0724	0.0875408	-0.540069	0.5899	101	61	0.0250016	pbal10fr
Medical.f0139	0.0874012	1.47914	0.139341	446	886	0.0249618	cafab
CSRI.f0585	0.0864153	-1.50184	0.133369	648	727	0.0246802	csri51
CSSRS.f0275	0.0850206	1.45391	0.146267	481	586	0.0242819	sbh4
CareQoL.f0430	0.0842985	-0.869807	0.384873	159	290	0.0240757
MMSE.f0319	0.083797	1.07433	0.282994	285	533	0.0239324
Cognitive.f0668	0.083546	0.793279	0.428142	166	193	0.0238607	mdrs3
Enrollment.f0093	0.0829529	1.73805	0.0823437	1600	563	0.0236913	rfstdy
CSRI.f0517	0.0824276	0.73243	0.464478	104	198	0.0235413	csri19b
PBAs.f0610	0.0820261	1.3997	0.161836	417	914	0.0234266	basbehworst,pbas5wo
SF.f0782	0.0815204	0.940853	0.347035	743	150	0.0232822	sf1
CareQoL.f0440	0.0808921	-0.809341	0.418757	156	286	0.0231028
CareQoL.f0452	0.0808527	0.826768	0.408815	159	285	0.0230915
CareQoL.f0414	0.0807939	0.816744	0.414514	155	290	0.0230747
PBAs.f0347	0.0798587	-1.72594	0.0845029	848	1290	0.0228076	basdel,pbas9sv
Cognitive.f0230	0.0798075	2.10626	0.0352637	1327	1695	0.022793	sdmt2
PBAs.f0337	0.0797011	1.80336	0.0714722	848	1296	0.0227626	basirrit,pbas4sv
SF.f0849	0.0783209	1.28127	0.200373	592	499	0.0223684	interferesocial,sf02
SF.f0379	0.0776675	1.11485	0.265196	324	629	0.0221818
CSSRS.f0272	0.0775399	-1.19552	0.232149	481	585	0.0221454	sbh2
CSRI.f0519	0.0774531	0.381724	0.703364	33	85	0.0221206	csri20a
MMSE.f0302	0.0770516	-1.1842	0.236679	286	535	0.0220059
MMSE.f0298	0.0768235	-1.07938	0.280737	286	535	0.0219408
HDCC.f0063	0.0767785	-1.47038	0.14167	846	649	0.0219279	ccdepage,depressage
CareQoL.f0449	0.076498	-0.756331	0.449854	156	287	0.0218478
Behaviour.f0892	0.0764885	1.33878	0.180889	658	586	0.0218451	behaviour_irascore
PBAs.f0359	0.0763158	-1.48106	0.13878	628	1033	0.0217958	bashousehold,pbahshd
PBAHD.f0728	0.0758077	0.467428	0.64083	101	61	0.0216507	pbal12fr
CareQoL.f0424	0.0753449	0.760014	0.44765	158	288	0.0215185
PBAs.f0349	0.0752362	-1.56515	0.117696	848	1291	0.0214875	bashall,pbas10sv
CSSRS.f0266	0.0752258	0.575726	0.565349	116	122	0.0214845	int3
CSSRS.f0278	0.0748026	-1.14535	0.252321	481	586	0.0213636	sbh6
CSRI.f0555	0.0741808	-1.61296	0.106915	1127	830	0.021186	csri36
CareQoL.f0411	0.0741408	0.734811	0.462844	155	290	0.0211746
SF.f0804	0.0732071	0.813211	0.416316	739	147	0.020908	sf23
Behaviour.f0919	0.0727467	-1.7908	0.073436	1843	899	0.0207764	deprrfr
Cognitive.f0243	0.0726756	-1.94388	0.0520011	1329	1735	0.0207561	swrt3
PBAHD.f0730	0.0725807	0.449289	0.653831	101	61	0.0207291	pbal13fr
PBAs.f0355	0.0725231	-1.51213	0.130648	849	1292	0.0207126	bashallfre,pbas10fr
CSRI.f0573	0.0718468	-1.2857	0.198763	649	725	0.0205195	csri45
SF.f0367	0.0703719	1.56279	0.11826	907	1118	0.0200982	re,re_nbs,resubscore
Enrollment.f0101	0.0703574	-1.27157	0.203741	846	540	0.0200941
SF.f0810	0.0696628	-0.786531	0.431767	737	151	0.0198957	sf29
CSRI.f0489	0.0678362	-0.554345	0.579835	106	148	0.019374	csri10a
SF.f0364	0.0672177	1.51703	0.129415	908	1130	0.0191974	gh,gh_nbs,ghsubscore
MMSE.f0293	0.0670561	0.892972	0.372135	286	535	0.0191512
CareQoL.f0439	0.0666564	-0.663668	0.507249	157	287	0.0190371
PBAs.f0345	0.0664533	-1.47504	0.140349	834	1294	0.0189791	basobscomp,pbas8sv
CSRI.f0500	0.0659681	-1.1978	0.231203	649	727	0.0188405	csri14
SF.f0809	0.0657867	0.743931	0.457115	737	151	0.0187887	sf28
CSRI.f0565	0.0655293	-1.42218	0.155133	1123	830	0.0187152	csri41
MHx.f0102	0.0650113	1.17854	0.238784	861	540	0.0185672	alcoholabuse,hxalcab
PBAs.f0346	0.0649667	-1.44009	0.149988	834	1294	0.0185545	basobscompfre,pbas8fr
SF.f0846	0.0646018	1.05409	0.292075	588	494	0.0184503	vt03,wornout
HDCC.f0075	0.0642101	-1.47067	0.141527	1265	896	0.0183384	cccog,dementia
HDCC.f0074	0.0635849	0.433046	0.665494	91	93	0.0181598	ccpsyfh
HDCC.f0078	0.0635148	-1.44115	0.149688	1293	856	0.0181398	sxsubj,symptomssubject
CSRI.f0490	0.0624991	0.479895	0.631723	104	147	0.0178497	csri10b
Behaviour.f0911	0.0624199	-1.59576	0.110654	1922	923	0.0178271	delussv
CSRI.f0521	0.062399	0.688759	0.491318	179	289	0.0178212	csri21
SF.f0786	0.0619879	-0.685502	0.493207	741	147	0.0177038	sf5
Cognitive.f0663	0.0617282	0.644947	0.519298	221	221	0.0176296	hvlt4
PBAs.f0340	0.0615487	1.39752	0.162403	848	1296	0.0175783	basbehfre,pbas5fr
PBAs.f0327	0.0614893	1.36924	0.171072	807	1276	0.0175614	irascore
CSSRS.f0261	0.0611145	0.383516	0.70186	77	81	0.0174543	sid3
PBAs.f0609	0.0609777	1.03575	0.300506	418	914	0.0174152	basirritworst,pbas4wo
CSRI.f0494	0.0609289	1.16148	0.245648	648	727	0.0174013	csri12
HDCC.f0086	0.0608512	-1.40808	0.159248	1344	889	0.0173791	majorsymptomrater,sxraterm
Summary.f0780	0.0597868	-1.63607	0.101917	2241	1191	0.0170751	dxentire
PBAs.f0332	0.0592288	1.34117	0.180009	848	1295	0.0169158	basdeprfre,pbas1fr
CSSRS.f0260	0.0592064	0.971276	0.331631	483	586	0.0169093	sid2
PBAHD.f0716	0.0587252	-0.363413	0.716776	101	61	0.0167719	pbal6fr
Cognitive.f0240	0.0587153	1.63149	0.102882	1443	1854	0.0167691	stroop,swrt
PBAHD.f0725	0.0583916	-0.360492	0.718955	101	61	0.0166766	pbal11sv
SF.f0378	0.0583264	-0.820482	0.412147	324	631	0.016658
PBAs.f0326	0.0580363	1.30108	0.193377	807	1275	0.0165752	depscore
CSRI.f0530	0.0579814	-0.946176	0.344225	650	726	0.0165595	csri24
SF.f0816	0.0570012	0.638593	0.523255	733	147	0.0162795	sf35
CSRI.f0553	0.0561242	-1.21693	0.223779	1113	819	0.0160291	csri35
SF.f0381	0.055762	-0.804368	0.421386	323	629	0.0159256
CareQoL.f0443	0.0553124	-0.556644	0.578053	158	285	0.0157972
Enrollment.f0096	0.0550765	-0.996448	0.319207	846	541	0.0157299
CSRI.f0473	0.0549851	-1.19635	0.231705	1130	837	0.0157037	csri6
MMSE.f0299	0.0533406	-0.752381	0.452038	286	535	0.0152341
Cognitive.f0254	0.0533359	-0.965242	0.334558	756	975	0.0152327	trialb_error,trlb3
Medical.f0140	0.0531924	0.827893	0.407915	370	705	0.0151917	cafpd
CareQoL.f0446	0.0529179	0.537453	0.591225	156	288	0.0151133
PBAHD.f0750	0.0522283	-0.324826	0.745737	101	61	0.0149164	pbal23fr
Behaviour.f0900	0.0521198	1.29642	0.194936	1922	923	0.0148854	suicfr
PBAs.f0348	0.0520565	-1.1476	0.251262	848	1291	0.0148673	basdelfre,pbas9fr
Cognitive.f0234	0.0519009	1.44928	0.147363	1293	1751	0.0148229	verfct6
MMSE.f0316	0.0514721	0.691938	0.489173	285	535	0.0147004
PBAs.f0339	0.0514243	1.16766	0.243075	849	1296	0.0146868	basbeh,pbas5sv
SF.f0807	0.0513319	0.587567	0.556972	737	151	0.0146604	sf26
PBAHD.f0721	0.0510994	0.315673	0.752662	101	61	0.014594	pbal9sv
SF.f0859	0.0509334	0.820314	0.412223	566	489	0.0145466	sf,sf_nbs
CSRI.f0581	0.0508707	-0.890143	0.373545	648	725	0.0145287	csri49
Behaviour.f0913	0.0506774	-1.2954	0.195287	1922	923	0.0144735	hallucsv
CSRI.f0497	0.0494009	0.955155	0.339668	649	725	0.0141089	csri13
CSSRS.f0264	0.0489975	-0.384164	0.70119	122	125	0.0139937	int1
Medical.f0141	0.0489406	1.51907	0.128833	1674	1947	0.0139774	drugab
PBAHD.f0726	0.048738	-0.300472	0.764207	101	61	0.0139196	pbal11fr
SF.f0805	0.0485506	0.552423	0.580798	735	151	0.0138661	sf24
Cognitive.f0238	0.0483421	1.44884	0.147484	1328	1737	0.0138065	scnt2
SF.f0856	0.046821	0.754184	0.450907	565	490	0.0133721	bp,bp_nbs
MHx.f0103	0.0465214	0.857884	0.3911	878	556	0.0132865	hxtobab,smoking,smoking_hx
CareQoL.f0431	0.0463886	0.469383	0.639026	158	289	0.0132486
CSRI.f0491	0.0463691	0.86454	0.387442	649	728	0.013243	csri11
HDCC.f0058	0.0458	-1.03006	0.303101	1276	838	0.0130805	dadhd
Cognitive.f0236	0.0454377	1.25532	0.209454	1401	1832	0.012977	scnt
Behaviour.f0910	0.0450957	-1.1479	0.251106	1922	923	0.0128793	delusfr
Enrollment.f0646	0.0446067	-0.59447	0.552355	593	262	0.0127397
SF.f0845	0.0436876	-0.714067	0.475339	588	497	0.0124772	downheart,mh04
Cognitive.f0250	0.0434444	-0.786561	0.431645	743	1005	0.0124077	trla2
CSRI.f0541	0.0430679	-0.939614	0.347532	1122	832	0.0123002	csri29
CSSRS.f0268	0.0428007	-0.331383	0.740649	118	120	0.0122239	int5
MHx.f0104	0.0421998	-0.344918	0.730437	124	136	0.0120523	cigperday,hxtobcpd,numbercigarettes
PBAHD.f0723	0.0406253	-0.250396	0.802603	101	61	0.0116026	pbal10sv
HDCC.f0065	0.0403601	-0.747372	0.454966	770	618	0.0115268	ccirbage,irritage
Behaviour.f0918	0.0403353	0.991596	0.321482	1855	901	0.0115198	deprexam
Behaviour.f0903	0.0403177	1.0088	0.313157	1912	921	0.0115147	aggrsv
SF.f0839	0.0399523	-0.654678	0.512814	592	497	0.0114104	bp02,interferework
motor_examiner_ext	0.0398816	0.165424	0.869109	37	32	0.0113902
CSRI.f0545	0.0395923	-0.866043	0.386573	1125	833	0.0113076	csri31
HDCC.f0083	0.0395659	0.825837	0.40901	936	812	0.0113	sxestcfd
CSSRS.f0265	0.0395437	0.307599	0.758659	118	120	0.0112937	int2
HDCC.f0061	0.0394522	-0.899936	0.368255	1254	889	0.0112675	ccmtrage,motorage
Cognitive.f0257	0.0391581	-1.03158	0.302356	1248	1577	0.0111836	verflt06
SF.f0787	0.0386202	0.4371	0.662144	745	152	0.0110299	sf6
SF.f0847	0.0383125	0.626833	0.530901	588	495	0.010942	happy,mh05
HDCC.f0085	0.0382066	-0.861035	0.389316	1275	844	0.0109118	majorsymptomfamily,sxfamm
HDCC.f0056	0.0381688	0.862796	0.388347	1286	848	0.010901	momhd
Cognitive.f0232	0.0373242	-0.859372	0.390203	1294	1752	0.0106598	verfctd
PBAHD.f0727	0.0370982	-0.22974	0.818587	101	61	0.0105952	pbal12sv
CSRI.f0476	0.0358426	0.380852	0.703487	179	289	0.0102366
CSRI.f0458	0.0357296	-0.783275	0.43356	1130	836	0.0102044	csri1
MMSE.f0304	0.0357276	0.473789	0.635777	286	535	0.0102038
MMSE.f0297	0.0357276	0.473789	0.635777	286	535	0.0102038
Cognitive.f0222	0.0351728	-0.99583	0.319409	1366	1799	0.0100453	gen1
CSRI.f0527	0.0348973	0.675619	0.499396	650	727	0.00996666	csri23
CareQoL.f0393	0.0344378	-0.34735	0.728492	158	290	0.00983542
HDCC.f0079	0.0337111	-0.753466	0.451255	1252	831	0.00962789	sxfam,symptomsfamily
CSRI.f0479	0.0336325	-0.735594	0.462066	1129	833	0.00960545	csri7
CSRI.f0482	0.0334286	-0.732551	0.46392	1129	835	0.0095472	csri8
SF.f0365	0.0331559	0.746353	0.455541	907	1119	0.00946933	vt,vt_nbs,vtsubscore
HDCC.f0069	0.0327227	-0.603841	0.54605	717	643	0.0093456	apathyage,ccaptage
Behaviour.f0912	0.0321739	-0.810368	0.417797	1922	923	0.00918888	hallucfr
HDCC.f0080	0.0320522	-0.740131	0.459299	1337	887	0.00915412	hddiagn,hddiagnosed
PBAHD.f0722	0.0318977	-0.197987	0.843306	101	61	0.00910999	pbal9fr
CareQoL.f0433	0.0311133	-0.316989	0.751401	159	288	0.00888597
CSRI.f0461	0.0307413	-0.673435	0.50075	1129	836	0.00877971	csri2
Behaviour.f0901	0.0303046	0.757593	0.448758	1923	923	0.00865499	suicsv
CSRI.f0524	0.0300797	0.573843	0.566168	650	727	0.00859076	csri22
CareQoL.f0434	0.0293206	-0.300324	0.76407	159	288	0.00837395
Behaviour.f0899	0.0284726	-0.71249	0.47622	1924	922	0.00813176	anxisv
HDCC.f0084	0.0284701	-0.651449	0.514825	1313	871	0.00813106	majorsymptomsubject,sxsubjm
SF.f0813	0.0272785	-0.311313	0.755636	736	152	0.00779073	sf32
PBAHD.f0749	0.026579	-0.164902	0.869229	101	61	0.00759095	pbal23sv
CSRI.f0462	0.0260452	0.190028	0.849459	106	121	0.00743852	csri2a
Enrollment.f0095	0.0258708	-0.469198	0.639002	847	540	0.00738871	fhx
Behaviour.f0898	0.0246728	-0.616905	0.537347	1925	922	0.00704654	anxifr
SF.f0812	0.0239065	0.273127	0.784819	734	152	0.0068277	sf31
Cognitive.f0246	0.0238712	-0.662993	0.507387	1290	1642	0.00681762	sit2
PBAHD.f0733	0.0233793	0.14279	0.886637	101	60	0.00667712	pbal15sv
CSRI.f0492	0.022958	0.142191	0.887119	79	74	0.0065568	csri11a
HDCC.f0082	0.021847	-0.496327	0.619715	1282	864	0.00623949	sxrater
Enrollment.f0098	0.0218281	0.397201	0.691281	847	540	0.00623409
PBAs.f0607	0.0216153	-0.360063	0.718857	418	914	0.00617332	bassuicworst,pbas2wo
PBAHD.f0760	0.0215561	0.131925	0.895212	101	59	0.00615643	pbal28fr
SF.f0850	0.0214154	0.350838	0.725778	588	497	0.00611623	gh02,sick
Behaviour.f0893	0.0210706	-0.367448	0.713348	658	586	0.00601776	behaviour_psyscore
PBAHD.f0759	0.0205352	0.12591	0.899963	101	59	0.00586485	pbal28sv
SF.f0811	0.0204133	0.229687	0.818388	738	151	0.00583003	sf30
CSRI.f0558	0.0202956	-0.0981154	0.922018	33	80	0.00579643	csri37a
PBAs.f0334	0.0195277	-0.433476	0.664712	849	1296	0.00557712	bassuicfre,pbas2fr
CareQoL.f0426	0.0192885	-0.194934	0.845534	159	287	0.0055088
PBAHD.f0717	0.0172234	-0.106444	0.915364	101	61	0.004919	pbal7sv
HDCC.f0076	0.0168159	-0.307632	0.758409	780	585	0.00480263	cccogage,dementage
Cognitive.f0247	0.0162324	0.4391	0.660622	1290	1642	0.00463597	sit3
Cognitive.f0242	0.0158474	-0.427188	0.669273	1329	1735	0.00452602	swrt2
PBAHD.f0743	0.0155909	0.0959012	0.92372	101	60	0.00445276	pbal20sv
PBAHD.f0718	0.0154124	0.0950848	0.924366	101	61	0.00440179	pbal7fr
CareQoL.f0392	0.0149921	-0.126192	0.899638	157	278	0.00428174
PBAs.f0333	0.014029	0.318796	0.749913	849	1296	0.00400669	bassuic,pbas2sv
CSRI.f0589	0.013156	0.287793	0.773536	1122	832	0.00375736	csri53
PBAHD.f0744	0.0127394	0.0783438	0.937653	101	60	0.00363838	pbal20fr
HDCC.f0059	0.0122942	0.178492	0.858378	530	350	0.00351124	dadagesx
HDCC.f0060	0.0122927	-0.281225	0.778565	1265	891	0.0035108	ccmtr,motor
SF.f0366	0.0120799	0.272033	0.785624	914	1127	0.00345001	sf,sf_nbs,sfsubscore
CareQoL.f0403	0.0117992	0.119605	0.90485	158	290	0.00336985
CSSRS.f0270	0.0116871	-0.189278	0.849911	481	586	0.00333784	sbh1
CSSRS.f0267	0.0114838	0.0899163	0.92843	118	121	0.00327976	int4
SF.f0842	0.0114741	-0.18768	0.851162	588	496	0.00327699	dumps,mh02
Behaviour.f0889	0.0108257	-0.271396	0.786106	1927	924	0.00309181	biscore
Cognitive.f0670	0.0107745	0.0922477	0.926553	166	193	0.00307719	mdrs5
SF.f0838	0.0101565	0.166776	0.867577	590	503	0.00290069	bodypain,bp01
Enrollment.f0097	0.010106	0.116022	0.907679	254	278	0.00288627
CSRI.f0460	0.00998615	-0.129529	0.896971	398	442	0.00285204	csri1b
PBAHD.f0734	0.00944489	0.057688	0.95407	101	60	0.00269746	pbal15fr
Cognitive.f0235	0.00854292	0.233274	0.815564	1293	1751	0.00243986	verfct7
cal.aoo	0.00830352	0.320371	0.748698	3633	2522	0.00237149
SF.f0837	0.00815389	-0.133824	0.893566	592	501	0.00232875	extent,sf01
MMSE.f0303	0.00777116	-0.106961	0.914846	286	535	0.00221944
CSRI.f0507	0.00740536	0.0477134	0.962003	64	102	0.00211497	csri16a
SF.f0802	0.00695151	0.0775109	0.938235	741	149	0.00198535	sf21
CSRI.f0536	0.00603494	-0.131944	0.895042	1126	831	0.00172358	csri26
MMSE.f0314	0.0055834	0.075532	0.93981	285	534	0.00159462
CareQoL.f0448	0.00532475	-0.0547224	0.956384	157	287	0.00152075
Cognitive.f0239	0.00508621	-0.139506	0.88906	1328	1737	0.00145262	scnt3
CareQoL.f0428	0.00456968	0.04553	0.963705	159	287	0.0013051
CareQoL.f0397	0.00454638	0.0455603	0.963681	154	290	0.00129845
CSRI.f0533	0.00419701	0.0782302	0.937656	650	726	0.00119866	csri25
PBAHD.f0715	0.00337265	-0.0208366	0.983402	101	61	0.000963228	pbal6sv
CSSRS.f0273	0.00336361	-0.0545745	0.956488	481	586	0.000960646	sbh3
CSRI.f0470	0.00264506	0.0580059	0.95375	1130	837	0.00075543	csri5
Behaviour.f0888	0.00256363	-0.0625307	0.950145	1821	877	0.000732172	behscore
HDCC.f0077	0.00186133	-0.032129	0.974374	448	890	0.000531597	hxsid
SF.f0363	0.00157017	0.035548	0.971646	913	1128	0.000448439	bp,bp_nbs,bpsubscore
CSSRS.f0277	0.00135439	-0.021989	0.982461	480	586	0.000386812	sbh5
CareQoL.f0410	0.00121332	0.012262	0.990222	157	289	0.000346524

## Sheet: cons_states_7_8
var	d	t_val	p_val	#samples_st7	#samples_st8	d_normalized	var_name
Functional.f0213	1.59623	54.19	0	2664	2018	0.538249	functionalscore,tfcscore
Functional.f0219	1.41898	46.5785	0	2448	1916	0.47848	fascore,functionscore
Functional.f0220	1.40915	47.0804	0	2551	1977	0.475164	fiscore
Functional.f0221	1.39841	46.8951	0	2575	1984	0.471543	indepencescale,indepscl
Functional.f0216	1.16582	39.4635	2.85589e-294	2665	2015	0.393116	chores,fcdomestic
Functional.f0217	1.12938	38.2766	4.0097e-279	2665	2016	0.380827	adl,fcadl
Motor.f0179	1.03752	-35.1301	3.43718e-240	2685	2001	0.349852	motorscore,motscore
Motor.f0180	1.03575	-35.2431	8.22724e-242	2711	2021	0.349253	miscore
Functional.f0215	1.03183	35.1629	8.87325e-241	2690	2031	0.347933	fcfinances,finances,finances_tfc
GCI.f0863	0.977493	-25.3674	2.44985e-128	1818	1072	0.329611	svrtyll
Cognitive.f0229	0.921108	27.1775	3.45119e-148	2165	1460	0.310598	sdmt_correct,sdmt1
Cognitive.f0654	0.894355	11.9724	3.49975e-31	902	229	0.301576	cogscore
Cognitive.f0241	0.884178	26.8367	2.42602e-145	2176	1598	0.298145	stroop_correct,swr_correct,swrt1
Cognitive.f0237	0.820922	25.0224	4.89679e-128	2178	1620	0.276815	scnt1
Motor.f0209	0.798336	-27.2724	2.56873e-152	2735	2035	0.269199	gait
Motor.f0210	0.793022	-27.0918	1.80298e-150	2737	2034	0.267407	tandem,tandemwalk
SF.f0797	0.763392	7.93657	8.32516e-15	568	130	0.257416	sf16
CSRI.f0547	0.745813	-14.8944	3.84712e-47	952	683	0.251488	csri32
Cognitive.f0245	0.721955	21.3297	3.55636e-95	2129	1484	0.243443	sit1
Motor.f0192	0.721517	-24.6495	2.22181e-126	2738	2035	0.243296	prosuphandsleft,prosupl
MMSE.f0291	0.718386	8.2484	1.03937e-15	234	361	0.24224	mmsetotal
Motor.f0191	0.701815	-23.9678	5.8262e-120	2737	2033	0.236652	prosuphandsright,prosupr
CSRI.f0519	0.696272	-4.18458	4.40073e-05	70	118	0.234783	csri20a
Motor.f0187	0.69249	-23.6708	3.19716e-117	2741	2038	0.233508	dysarth,dysarthria
finger.score	0.683317	-23.3365	3.81169e-114	2736	2033	0.230415
Cognitive.f0233	0.666968	17.0887	4.32379e-62	1205	1362	0.224902	verfct5
Motor.f0190	0.661445	-22.605	1.42965e-107	2741	2035	0.223039	fingertapsleft,fingtapl
Cognitive.f0667	0.66033	6.24995	1.15188e-09	206	159	0.222663	mdrs2
oculo.score	0.653688	-22.3418	3.04879e-105	2738	2037	0.220424
Cognitive.f0249	0.649467	-11.7694	1.6121e-30	699	661	0.219	traila_time,trla1
Care.f0864	0.639511	-11.2736	2.95481e-28	890	486	0.215643	crgvr1
Cognitive.f0253	0.633348	10.9344	1.33527e-26	630	578	0.213565	trlb2
SF.f0790	0.617551	6.29632	5.40563e-10	567	129	0.208238	sf9
Motor.f0189	0.612552	-20.9315	3.78709e-93	2738	2036	0.206552	fingertapsright,fingtapr
Functional.f0214	0.596675	20.3122	5.62412e-88	2664	2019	0.201199	fcoccupation,occupatn
Functional.f0218	0.587028	19.8359	3.8408e-84	2665	2016	0.197946	carelevl,fccarelevel
Care.f0867	0.583938	-10.3145	4.51149e-24	886	482	0.196904	crgvr4
Cognitive.f0223	0.582438	-2.68217	0.0088631	37	46	0.196398	gen2
SF.f0789	0.581455	5.90568	5.49824e-09	566	130	0.196067	sf8
PBAHD.f0735	0.575978	-3.09289	0.00248355	70	48	0.19422	pbal16sv
Care.f0866	0.574676	-10.2178	1.13898e-23	885	486	0.193781	crgvr3
Care.f0865	0.573912	-10.1251	2.74176e-23	889	487	0.193523	crgvr2
SF.f0829	0.567458	8.45496	1.12026e-16	496	404	0.191347	bathing,pf10
SF.f0794	0.553384	5.5685	3.66969e-08	568	131	0.186601	sf13
Physio.f0325	0.54984	5.10658	5.42141e-07	145	204	0.185406	scst1
Motor.f0193	0.548265	-18.7257	1.48035e-75	2738	2032	0.184875	luria
Motor.f0185	0.547723	-18.7218	1.57072e-75	2740	2037	0.184692	sacvelh,sacvelocityhor
PBAHD.f0742	0.547033	-2.90663	0.00439091	69	47	0.18446	pbal19fr
Cognitive.f0668	0.541851	5.09201	5.71009e-07	206	158	0.182712	mdrs3
SF.f0791	0.536307	5.49812	5.39054e-08	568	131	0.180843	sf10
Motor.f0196	0.535848	-18.3078	2.05612e-72	2737	2036	0.180688	bradkinbody,brady
brady.score	0.535848	-18.3078	2.05612e-72	2737	2036	0.180688
PBAHD.f0754	0.535746	-2.86676	0.00492624	70	48	0.180654	pbal25fr
Motor.f0186	0.524821	-17.9388	1.08826e-69	2740	2037	0.17697	sacvelocityver,sacvelv
PBAHD.f0736	0.522524	-2.8024	0.00594618	70	48	0.176195	pbal16fr
SF.f0792	0.520877	5.35289	1.17556e-07	569	131	0.17564	sf11
Motor.f0182	0.514893	-17.6049	2.89102e-67	2741	2038	0.173622	ocularv,ocupursuitver
Motor.f0211	0.510329	-17.4116	7.13129e-66	2734	2028	0.172083	retpulltest,retropls
Cognitive.f0256	0.509997	15.1635	2.06651e-50	2125	1521	0.171971	verflt05
SF.f0854	0.509734	7.44003	2.44436e-13	471	389	0.171882	pf,pf_nbs
Motor.f0184	0.509011	-17.4016	8.28318e-66	2740	2037	0.171638	sacinitiationver,sacinitv
SF.f0372	0.505587	6.51435	1.43702e-10	267	403	0.170484
Motor.f0188	0.504524	-17.2452	1.06856e-64	2742	2036	0.170125	tongue,tonprotrusion
PBAHD.f0753	0.504058	-2.69431	0.00810067	70	48	0.169968	pbal25sv
MMSE.f0321	0.495508	5.9884	3.66091e-09	235	364	0.167085
Motor.f0183	0.489837	-16.7455	3.3021e-61	2740	2037	0.165173	sacinith,sacinitiationhor
Motor.f0181	0.484672	-16.5711	5.18766e-60	2741	2038	0.163431	ocularh,ocupursuithor
Summary.f0778	0.477786	12.3887	2.11081e-34	1849	1113	0.16111	impwrsex
SF.f0788	0.469136	4.42768	1.10811e-05	560	128	0.158193	sf7
CSRI.f0767	0.46614	-8.03607	2.07926e-15	803	488	0.157182
SF.f0822	0.462816	6.91232	9.03829e-12	495	405	0.156062	lifting,pf03
PBAHD.f0752	0.462485	-2.47757	0.0146686	70	48	0.15595	pbal24fr
SF.f0795	0.450374	4.70457	3.06925e-06	567	131	0.151866	sf14
Cognitive.f0659	0.449698	4.66376	4.11926e-06	261	183	0.151638	hvltt31
SF.f0796	0.448782	4.74054	2.58508e-06	568	131	0.151329	sf15
Cognitive.f0660	0.445501	4.60473	5.41379e-06	261	181	0.150223	hvlt1
PBAHD.f0741	0.434979	-2.30802	0.0228017	69	47	0.146675	pbal19sv
SF.f0361	0.434743	8.54421	3.08061e-17	746	786	0.146595	pf,pf_nbs,pfsubscore
SF.f0821	0.431113	6.43464	2.01205e-10	495	404	0.145371	activitiesm,pf02
dystonia.score	0.430311	-14.6885	8.35709e-48	2733	2034	0.145101
PBAs.f0357	0.429435	-8.3973	9.49747e-17	719	983	0.144805	basorientfre,pbas11fr
MMSE.f0307	0.427218	5.21451	2.53639e-07	235	370	0.144058
MMSE.f0320	0.419205	4.70594	3.14245e-06	234	366	0.141356
SF.f0793	0.41842	4.32397	1.75601e-05	568	131	0.141091	sf12
Motor.f0197	0.41628	-14.2181	5.79725e-45	2737	2035	0.14037	dysttrnk,maxdystrunk
PBAHD.f0751	0.414688	-2.21908	0.0284272	70	48	0.139833	pbal24sv
Physio.f0323	0.414457	-3.59754	0.000366675	148	210	0.139755	tug1
MMSE.f0308	0.410726	5.00214	7.45008e-07	234	370	0.138497
Cognitive.f0658	0.410508	4.25832	2.51766e-05	261	183	0.138423	hvltt21
Cognitive.f0663	0.407504	4.22488	2.90771e-05	260	182	0.13741	hvlt4
CSRI.f0510	0.407116	-2.09576	0.0381372	45	81	0.137279	csri17a
Cognitive.f0666	0.405734	3.82898	0.000151469	207	159	0.136814	mdrs1
WPAI.f0600	0.402557	-4.03837	6.45011e-05	178	225	0.135742
SF.f0369	0.397012	7.47701	1.33472e-13	696	707	0.133872	pcs,pcsum
Behaviour.f0917	0.396981	-9.10222	1.86488e-19	1538	767	0.133862	dement
PBAHD.f0738	0.394685	-2.10697	0.0372746	70	48	0.133088	pbal17fr
WPAI.f0594	0.390252	-3.91317	0.000106954	178	226	0.131593	wpaiscr4
Care.f0868	0.388327	-6.89316	8.32139e-12	881	483	0.130944	crgvr5
Cognitive.f0225	0.386238	1.77943	0.0788742	37	47	0.130239	gen4
SF.f0825	0.380201	5.67394	1.88227e-08	495	405	0.128204	bending,pf06
CSRI.f0549	0.379953	-7.56111	6.63496e-14	952	680	0.12812	csri33
MMSE.f0305	0.379549	4.33625	1.69809e-05	235	371	0.127984
SF.f0827	0.379122	5.64307	2.2413e-08	492	405	0.12784	pf08,walkings
CSRI.f0551	0.371661	-7.39583	2.23892e-13	950	680	0.125324	csri34
MMSE.f0306	0.370968	4.51658	7.56237e-06	235	370	0.12509
MMSE.f0296	0.365196	4.31384	1.87315e-05	235	373	0.123144
Cognitive.f0248	0.364328	7.48538	1.11305e-13	819	973	0.122852	trl
MMSE.f0294	0.360969	4.0205	6.54014e-05	235	373	0.121719
Summary.f0779	0.360057	9.35302	1.62974e-20	1852	1108	0.121411	impwrssj
Cognitive.f0657	0.356338	3.6958	0.000246713	261	183	0.120157	hvltt11
SF.f0373	0.353616	4.51917	7.35715e-06	265	397	0.119239
PBAs.f0616	0.349482	-5.18804	2.53899e-07	354	723	0.117845	basorientworst,pbas11wo
Motor.f0199	0.349257	-11.9295	2.38549e-32	2737	2036	0.117769	dystlue,maxdyslue
SF.f0824	0.348931	5.17955	2.75174e-07	491	401	0.11766	climbingo,pf05
Motor.f0198	0.348094	-11.8892	3.81552e-32	2736	2036	0.117377	dystrue,maxdysrue
CSRI.f0575	0.34675	-6.94957	5.27046e-12	953	687	0.116924	csri46
rigidity.score	0.346326	-11.8326	7.3523e-32	2739	2036	0.116781
PBAs.f0356	0.346268	-6.87048	8.94766e-12	719	983	0.116762	basorient,pbas11sv
CSRI.f0775	0.343027	-4.48862	8.40466e-06	355	334	0.115669	csri60__1
Motor.f0194	0.342779	-11.7126	2.93174e-31	2740	2036	0.115585	rigarmr,rigarmsright
MMSE.f0292	0.335331	3.81936	0.000147577	235	373	0.113074
PBAHD.f0737	0.332243	-1.77226	0.0789771	70	48	0.112032	pbal17sv
Cognitive.f0228	0.327244	8.14802	5.57855e-16	1278	1443	0.110347	digit,sdmt
WPAI.f0595	0.322298	3.62835	0.000321809	178	228	0.108679
MHx.f0105	0.322016	-2.03516	0.0434849	88	74	0.108584	hxtobyos,smokyears
CareQoL.f0421	0.321653	2.9777	0.00309814	153	214	0.108461
Motor.f0195	0.32072	-10.9604	1.26079e-27	2740	2037	0.108147	rigarml,rigarmsleft
PBAHD.f0710	0.318377	-1.71903	0.0882764	70	48	0.107357	pbal3fr
SF.f0823	0.317822	4.73451	2.55266e-06	492	403	0.107169	climbings,pf04
SF.f0828	0.315516	4.69186	3.13015e-06	495	402	0.106392	pf09,walkingo
Motor.f0200	0.315034	-10.7609	1.06399e-26	2738	2036	0.106229	dystrle,maxdysrle
Motor.f0201	0.312456	-10.6689	2.80887e-26	2735	2035	0.10536	dystlle,maxdyslle
PBAHD.f0740	0.312414	-1.67121	0.0973988	69	48	0.105346	pbal18fr
PBAHD.f0758	0.310254	-1.6947	0.0928148	70	48	0.104618	pbal27fr
PBAHD.f0757	0.310254	-1.6947	0.0928148	70	48	0.104618	pbal27sv
CSRI.f0502	0.306485	1.33902	0.184897	38	34	0.103347	csri14b
CSRI.f0462	0.305495	2.48079	0.0138353	111	118	0.103013	csri2a
PBAHD.f0755	0.303931	-1.63581	0.104591	70	48	0.102486	pbal26sv
MMSE.f0309	0.303428	3.6964	0.000238632	234	370	0.102316
SF.f0781	0.296895	2.98923	0.00289975	543	126	0.100113	sfscore_v1
PBAHD.f0766	0.295828	-1.59395	0.113669	70	48	0.0997533	pbal31fr
Motor.f0203	0.287364	-9.8195	1.51557e-22	2737	2038	0.096899	chorbol,choreabol
CSRI.f0537	0.28721	5.23011	2.00312e-07	588	593	0.0968474	csri27
SF.f0833	0.285774	4.21264	2.78385e-05	494	389	0.0963629	physicdiff,rp04
Behaviour.f0914	0.282806	-6.55303	6.87798e-11	1599	801	0.0953621	apathfr
Cognitive.f0670	0.282596	2.68708	0.00753952	207	158	0.0952912	mdrs5
SF.f0826	0.282106	4.20988	2.81223e-05	496	404	0.0951262	pf07,walkingm
CSRI.f0465	0.279212	-1.75416	0.0809822	93	103	0.0941504	csri3a
SF.f0832	0.277089	4.0773	4.96983e-05	493	387	0.0934345	physiclimit,rp03
Cognitive.f0244	0.276009	6.92463	5.43175e-12	1280	1446	0.0930702	sit
PBAHD.f0709	0.275624	-1.48387	0.140555	70	48	0.0929403	pbal3sv
CareQoL.f0427	0.274191	2.5376	0.0115758	153	215	0.0924572
PBAHD.f0756	0.272125	-1.46519	0.145573	70	48	0.0917605	pbal26fr
SF.f0787	0.271095	2.8654	0.00429024	568	131	0.0914131	sf6
PBAHD.f0714	0.270314	-1.45075	0.149548	70	48	0.09115	pbal5fr
SF.f0375	0.269947	3.38644	0.000750321	265	393	0.0910261
SF.f0855	0.2636	3.81155	0.000148088	472	378	0.0888861	rp,rp_nbs
Care.f0871	0.263358	-4.68845	3.02801e-06	884	485	0.0888042	crgvr8
Behaviour.f0891	0.261684	-4.42892	1.03651e-05	621	541	0.0882398	defscore
Behaviour.f0915	0.259435	-6.02459	1.95676e-09	1599	801	0.0874813	apathsv
Cognitive.f0251	0.257972	-4.62113	4.18161e-06	691	660	0.0869881	triala_error,trla3
MMSE.f0315	0.256414	3.02001	0.0026341	235	373	0.0864627
CSRI.f0581	0.254814	-4.05745	5.28814e-05	586	593	0.0859234	csri49
SF.f0371	0.252	-3.24853	0.00121796	270	402	0.0849744
MMSE.f0303	0.251762	2.69608	0.00721091	235	373	0.0848941
PBAs.f0344	0.24833	-4.96163	7.69739e-07	701	983	0.0837367	baspersevfre,pbas7fr
CareQoL.f0418	0.246782	2.28248	0.023034	153	215	0.0832149
CSSRS.f0265	0.24395	1.6145	0.108242	84	91	0.0822598	int2
SF.f0803	0.242597	2.44711	0.0146508	559	128	0.0818039	sf22
CSRI.f0515	0.241995	-4.84403	1.3921e-06	958	687	0.0816007	csri19
CSRI.f0509	0.240524	-4.03964	5.69955e-05	587	594	0.0811047	csri17
CSRI.f0561	0.239583	-4.79333	1.78895e-06	953	686	0.0807874	csri39
Enrollment.f0646	0.23781	3.15684	0.00166226	477	236	0.0801896
SF.f0783	0.236522	2.47632	0.0135093	572	131	0.0797551	sf2
PBAs.f0329	0.234708	-4.68404	3.03982e-06	699	978	0.0791437	aptscore
SF.f0862	0.232269	3.15184	0.00168715	423	327	0.0783212	sfscore
SF.f0782	0.231652	2.39416	0.0169216	568	131	0.078113	sf1
CSRI.f0518	0.231084	-3.91944	9.38427e-05	590	595	0.0779214	csri20
Cognitive.f0661	0.230996	2.38052	0.017711	261	183	0.077892	hvlt2
Motor.f0202	0.230455	-7.87702	4.12058e-15	2740	2038	0.0777096	choreaface,chorface
SF.f0830	0.229525	3.37249	0.000777563	489	389	0.0773958	physiccut,rp01
PBAHD.f0747	0.228545	-1.22587	0.22273	70	48	0.0770655	pbal22sv
MMSE.f0298	0.227771	2.62419	0.0089043	235	373	0.0768042
PBAHD.f0716	0.227583	1.21245	0.227805	70	48	0.0767411	pbal6fr
CareQoL.f0415	0.225095	2.09164	0.0371613	153	214	0.0759021
SF.f0801	0.224713	2.22273	0.0265598	561	126	0.0757733	sf20
CSRI.f0508	0.224004	1.56388	0.119716	86	85	0.0755342	csri16b
CSRI.f0489	0.222169	1.76121	0.0794665	133	111	0.0749155	csri10a
CSRI.f0481	0.221989	1.10147	0.273997	35	47	0.0748546	csri7b
PBAHD.f0739	0.221247	-1.18151	0.239837	69	48	0.0746046	pbal18sv
SF.f0806	0.218955	-2.17731	0.0297926	567	131	0.0738316	sf25
CSRI.f0507	0.218649	1.51767	0.130989	84	85	0.0737284	csri16a
PBAHD.f0762	0.217393	1.1169	0.26645	67	46	0.0733049	pbal29fr
PBAHD.f0761	0.217393	1.1169	0.26645	67	46	0.0733049	pbal29sv
MMSE.f0317	0.217154	2.42011	0.0158096	235	372	0.0732243
HDCC.f0070	0.216512	-4.17597	3.13428e-05	898	636	0.073008	ccpob,obsessive
PBAHD.f0764	0.215769	1.12059	0.264839	68	47	0.0727572	pbal30fr
PBAHD.f0763	0.215769	1.12059	0.264839	68	47	0.0727572	pbal30sv
SF.f0820	0.215459	3.21917	0.00133174	495	405	0.0726527	activitiesv,pf01
MMSE.f0293	0.215121	2.49239	0.0129548	235	373	0.0725387
CSRI.f0579	0.21463	-3.58029	0.000357181	587	593	0.0723732	csri48
PBAHD.f0713	0.213391	-1.14275	0.255496	70	48	0.0719556	pbal5sv
Care.f0869	0.211741	-3.76762	0.000171795	890	484	0.071399	crgvr6
HDCC.f0074	0.209797	1.40697	0.161179	99	81	0.0707435	ccpsyfh
SF.f0804	0.205889	2.08823	0.0371466	557	128	0.0694257	sf23
PBAs.f0341	0.204674	-4.15205	3.45813e-05	718	986	0.0690162	basapath,pbas6sv
Enrollment.f0645	0.203723	-2.64276	0.00840439	477	236	0.0686953
PBAs.f0343	0.201917	-4.07525	4.80971e-05	706	985	0.0680864	baspersev,pbas7sv
CSRI.f0571	0.201687	-4.04539	5.46658e-05	954	686	0.068009	csri44
CSRI.f0490	0.201622	1.60353	0.110123	134	110	0.067987	csri10b
PBAs.f0342	0.200533	-4.091	4.4958e-05	718	986	0.0676199	basapathfre,pbas6fr
CareQoL.f0424	0.200463	-1.88556	0.0601465	154	214	0.0675962
MMSE.f0295	0.199899	2.31441	0.0209789	235	373	0.067406
Cognitive.f0664	0.198786	-2.06043	0.0399452	260	182	0.0670305	hvlt5
SF.f0382	0.198494	2.50039	0.0126449	270	398	0.0669321
PBAs.f0612	0.197748	-2.987	0.00288245	339	718	0.0666806	pbas7wo
CareQoL.f0411	0.197259	1.86027	0.0636499	154	214	0.0665157
SF.f0380	0.195623	-2.47107	0.013724	267	391	0.0659641
CareQoL.f0435	0.195427	1.8521	0.0648214	151	215	0.0658979
CareQoL.f0450	0.194327	1.84377	0.0660221	154	215	0.0655272
PBAHD.f0759	0.193568	-1.01618	0.311752	66	47	0.0652711	pbal28sv
CSRI.f0485	0.19299	-3.86005	0.000117756	960	685	0.0650761	csri9
MHx.f0106	0.192948	-2.02911	0.043011	293	178	0.0650619	hxpacky
Care.f0877	0.192826	-3.41554	0.000655234	883	485	0.0650208	crgvr14
Care.f0872	0.19092	-3.39937	0.000694781	888	486	0.0643783	crgvr9
SF.f0374	0.188714	2.41559	0.0159779	269	399	0.0636344
PBAs.f0330	0.188472	-3.75986	0.000175849	697	979	0.0635526	exfscore
CSRI.f0492	0.188251	0.977178	0.330665	63	47	0.0634781	csri11a
CareQoL.f0451	0.18817	1.76271	0.0787841	153	215	0.0634511
SF.f0819	0.187493	-2.79231	0.0053447	497	401	0.0632226	compared,ht
SF.f0378	0.18737	-2.32675	0.0202781	270	397	0.0631811
CSSRS.f0263	0.185502	-0.928477	0.355396	51	51	0.0625512	sid5
SF.f0798	0.184649	1.8637	0.0627897	562	127	0.0622638	sf17
CareQoL.f0441	0.183913	-1.74778	0.0813455	154	212	0.0620155
PBAs.f0611	0.183687	-2.79879	0.0052211	354	723	0.0619391	basapathworst,pbas6wo
HADS.f0384	0.182843	-3.48512	0.000506318	729	748	0.0616547	depscore,hads_depscore
CSRI.f0548	0.181562	-1.29508	0.196096	96	278	0.0612225	csri32a
CSRI.f0486	0.180511	-1.92792	0.0544747	208	258	0.0608683	csri9a
PBAHD.f0744	0.179507	-0.958415	0.339864	69	48	0.0605298	pbal20fr
Enrollment.f0097	0.179414	-1.76133	0.0789679	223	168	0.0604985
CSRI.f0476	0.179314	-1.57661	0.11581	148	196	0.0604646
PBAHD.f0748	0.179147	-0.959735	0.339185	70	48	0.0604083	pbal22fr
chorea.score	0.179107	-6.11873	1.01867e-09	2737	2037	0.0603949
CareQoL.f0406	0.178424	1.65457	0.0988661	154	215	0.0601645
SF.f0784	0.178114	1.84011	0.0661782	567	130	0.0600599	sf3
Enrollment.f0099	0.177758	-1.74723	0.0813873	223	168	0.0599402
SF.f0800	0.177744	1.77218	0.0768085	560	127	0.0599353	sf19
CareQoL.f0442	0.177434	-1.69954	0.0900679	153	215	0.0598308
CareQoL.f0423	0.17711	-1.67089	0.0955968	154	215	0.0597215
SF.f0807	0.17589	1.84058	0.0661106	565	131	0.0593101	sf26
Enrollment.f0093	0.175653	3.19474	0.00142712	1172	413	0.0592302	rfstdy
PBAHD.f0765	0.175049	-0.936449	0.350988	70	48	0.0590266	pbal31sv
MMSE.f0310	0.175018	2.08782	0.0372319	235	372	0.0590162
Behaviour.f0921	0.17403	-3.96595	7.5252e-05	1595	800	0.0586828	isobt
SF.f0786	0.173649	1.83284	0.0672619	556	128	0.0585546	sf5
HDCC.f0068	0.172934	-3.32897	0.000892417	896	634	0.0583133	apathy,ccapt
PBAHD.f0715	0.172025	0.917302	0.360887	70	48	0.0580067	pbal6sv
Cognitive.f0252	0.171795	-2.97454	0.00299259	635	575	0.0579293	trailb_time,trlb1
CSRI.f0516	0.170765	-1.61973	0.106139	162	211	0.0575821	csri19a
PBAHD.f0743	0.169791	-0.90584	0.366915	69	48	0.0572536	pbal20sv
PBAs.f0359	0.169411	-3.15307	0.00164737	627	887	0.0571253	bashousehold,pbahshd
CareQoL.f0412	0.168875	1.60195	0.110032	152	215	0.0569446
PBAHD.f0717	0.168492	0.897442	0.371342	70	48	0.0568155	pbal7sv
CSRI.f0583	0.167174	-2.79978	0.0051972	588	593	0.0563711	csri50
SF.f0831	0.165714	2.43556	0.015067	491	388	0.0558786	physicacc,rp02
CareQoL.f0428	0.164953	-1.54862	0.122337	153	215	0.0556223
Cognitive.f0240	0.164359	4.15924	3.29081e-05	1300	1454	0.0554218	stroop,swrt
Care.f0874	0.162603	-2.89013	0.00391163	886	483	0.0548296	crgvr11
CareQoL.f0420	0.162495	-1.52461	0.128221	153	215	0.0547933
Cognitive.f0250	0.161422	2.75884	0.00588014	675	658	0.0544313	trla2
CSRI.f0493	0.161341	-0.829126	0.408896	62	46	0.0544043	csri11b
Motor.f0204	0.160803	-5.49637	4.0785e-08	2740	2038	0.0542227	choreatrunk,chortrnk
Enrollment.f0648	0.16061	-1.92724	0.0543673	462	218	0.0541577
CSRI.f0774	0.160389	2.25791	0.0242428	379	361	0.0540832	csri59
CSRI.f0466	0.159839	1.17126	0.242937	93	102	0.0538976	csri3b
MMSE.f0302	0.159576	1.59344	0.111583	235	373	0.0538089
Cognitive.f0255	0.154324	3.93537	8.51453e-05	1280	1446	0.0520379	verflt
PBAHD.f0730	0.154107	-0.825462	0.410804	70	48	0.0519648	pbal13fr
SF.f0362	0.152928	2.97626	0.00296419	747	769	0.0515673	rp,rp_nbs,rpsubscore
PBAHD.f0760	0.152355	-0.799259	0.425847	66	47	0.0513743	pbal28fr
Motor.f0212	0.152048	-5.16989	2.44045e-07	2634	2023	0.0512705	diagconf
CareQoL.f0393	0.152013	1.43238	0.152891	153	214	0.0512589
CareQoL.f0433	0.149913	-1.41196	0.158814	153	214	0.0505507
Behaviour.f0897	0.149293	3.35146	0.000816947	1524	764	0.0503415	guiltsv
Behaviour.f0907	0.147903	-3.4468	0.000577048	1596	802	0.0498728	obsesssv
Cognitive.f0246	0.146135	-3.55667	0.000382836	1183	1226	0.0492768	sit2
Care.f0873	0.145519	-2.57095	0.0102471	884	486	0.0490691	crgvr10
Behaviour.f0906	0.143616	-3.34773	0.000827372	1595	802	0.0484274	obsessfr
MMSE.f0297	0.143562	1.60128	0.109836	235	373	0.0484092
MMSE.f0312	0.141009	1.70473	0.0887575	235	372	0.0475482
Care.f0876	0.140854	-2.50417	0.0123902	880	484	0.047496	crgvr13
CSRI.f0503	0.140087	2.50014	0.0125491	589	594	0.0472374	csri15
CSSRS.f0266	0.138414	0.924127	0.356723	83	90	0.0466733	int3
SF.f0834	0.138386	2.03169	0.0424867	490	388	0.0466639	emotioncut,re01
Medical.f0135	0.13829	3.83153	0.000129934	1424	1605	0.0466315	alcab
CSRI.f0773	0.138268	-1.88064	0.0604164	379	357	0.046624	csri58
Care.f0878	0.138065	-2.45616	0.0141669	885	480	0.0465554	crgvr15
Cognitive.f0662	0.13565	1.40498	0.160728	261	183	0.0457413	hvlt3
PBAHD.f0718	0.134586	0.717056	0.474781	70	48	0.0453825	pbal7fr
Care.f0875	0.134496	-2.39344	0.0168254	886	485	0.045352	crgvr12
CSSRS.f0261	0.133322	-0.677738	0.499487	51	52	0.0449562	sid3
SF.f0851	0.133074	-1.95738	0.0506201	487	391	0.0448725	gh03,healthy
CareQoL.f0455	0.133067	-1.24665	0.213343	149	210	0.0448701
Behaviour.f0913	0.131245	-3.19556	0.00141372	1598	802	0.0442558	hallucsv
Enrollment.f0101	0.13013	-2.02322	0.0432923	699	403	0.0438798
SF.f0802	0.12967	1.31592	0.188643	559	126	0.0437248	sf21
MMSE.f0304	0.129608	1.45322	0.146681	235	373	0.0437038
CSRI.f0567	0.128257	-2.14246	0.0323612	586	592	0.0432481	csri42
SF.f0785	0.127533	1.31415	0.189228	571	131	0.043004	sf4
Behaviour.f0896	0.125741	2.83081	0.00468358	1524	764	0.0423999	guiltfr
CareQoL.f0445	0.125114	1.21184	0.226354	154	214	0.0421885
CSRI.f0776	0.124993	1.26394	0.206968	227	186	0.0421476	csri60__2
SF.f0376	0.124128	1.55191	0.12116	269	397	0.041856
SF.f0814	0.123756	1.27376	0.203181	553	130	0.0417304	sf33
CareQoL.f0419	0.123086	-1.14593	0.252576	151	215	0.0415045
CSRI.f0557	0.123043	-2.09	0.0368319	586	593	0.0414902	csri37
CSRI.f0577	0.122768	-2.4557	0.0141643	953	686	0.0413974	csri47
Cognitive.f0236	0.122669	3.10603	0.00191571	1280	1445	0.041364	scnt
Cognitive.f0669	0.122495	1.15692	0.248066	207	158	0.0413054	mdrs4
Behaviour.f0895	0.121886	2.81011	0.00499259	1599	802	0.0411	deprsv
CSRI.f0552	0.121439	-1.37767	0.168834	251	334	0.0409494	csri34a
CareQoL.f0413	0.1212	1.14569	0.252671	154	215	0.0408688
MMSE.f0318	0.1209	1.39287	0.16417	235	372	0.0407675
PBAHD.f0729	0.119822	-0.640945	0.522823	70	48	0.0404039	pbal13sv
Behaviour.f0894	0.11954	2.75388	0.00593369	1599	802	0.0403087	deprfr
MMSE.f0301	0.118896	1.40687	0.159978	235	373	0.0400918
CareQoL.f0392	0.117666	1.25805	0.209199	147	210	0.039677
CSRI.f0563	0.117665	-2.35265	0.0187579	953	685	0.0396767	csri40
Behaviour.f0912	0.117605	-2.85147	0.00438906	1597	802	0.0396563	hallucfr
SF.f0842	0.117228	-1.73289	0.0834645	488	395	0.0395292	dumps,mh02
CSRI.f0463	0.115962	0.915128	0.361095	111	118	0.0391024	csri2b
Behaviour.f0893	0.11583	-1.92834	0.0540575	620	541	0.0390579	behaviour_psyscore
Enrollment.f0096	0.115522	1.90151	0.0574956	700	403	0.038954
SF.f0836	0.115464	1.69942	0.0895935	491	390	0.0389344	emotioncare,re03
Behaviour.f0909	0.115175	-2.68296	0.00734785	1584	798	0.038837	compulsv
Cognitive.f0655	0.114896	1.58084	0.114327	434	336	0.038743	hvlt
SF.f0840	0.114668	-1.69367	0.0906803	491	396	0.038666	life,vt01
CareQoL.f0430	0.114265	-1.07779	0.281839	154	213	0.0385303
SF.f0377	0.114037	1.43212	0.152587	268	390	0.0384533
CareQoL.f0457	0.113299	-0.668153	0.50516	62	77	0.0382044
Behaviour.f0892	0.113156	-1.91271	0.056031	621	541	0.0381563	behaviour_irascore
SF.f0379	0.113026	-1.42764	0.153867	268	395	0.0381125
MMSE.f0316	0.112684	1.32515	0.185622	235	372	0.037997
CSRI.f0467	0.111702	-1.88592	0.0595501	592	594	0.0376659	csri4
CareQoL.f0414	0.111571	1.06018	0.289762	153	214	0.0376216
CSRI.f0464	0.109569	-2.19421	0.0283595	961	686	0.0369467	csri3
CSRI.f0543	0.109534	2.18412	0.0290943	956	686	0.0369347	csri30
SF.f0848	0.108524	-1.60639	0.108545	490	396	0.0365943	tired,vt04
PBAHD.f0750	0.108259	0.576976	0.565074	70	48	0.036505	pbal23fr
SF.f0860	0.108004	1.56978	0.116834	476	384	0.0364188	re,re_nbs
SF.f0368	0.107075	-2.09252	0.0365575	748	771	0.0361058	mh,mh_nbs,mhsubscore
CareQoL.f0389	0.105641	0.850735	0.395479	152	212	0.0356222
CSRI.f0524	0.105253	1.90799	0.0566345	589	594	0.0354913	csri22
CSRI.f0458	0.104968	-2.10167	0.0357336	961	688	0.0353953	csri1
Behaviour.f0920	0.104532	-2.37938	0.0174227	1537	770	0.0352483	irritrfr
CareQoL.f0403	0.104378	-0.975056	0.330175	154	215	0.0351962
Behaviour.f0916	0.104136	-2.38753	0.0170422	1539	769	0.0351146	confus
Behaviour.f0918	0.103454	2.33123	0.0198272	1537	769	0.0348847	deprexam
Care.f0879	0.101595	-1.80974	0.0705555	884	482	0.0342578	crgvr16
Summary.f0777	0.10122	-2.66594	0.00771886	1857	1115	0.0341314	visitprp
HDCC.f0075	0.100824	-1.93631	0.0530147	897	628	0.033998	cccog,dementia
MMSE.f0319	0.100589	1.16523	0.244387	235	371	0.0339187
CSRI.f0483	0.100498	-1.42435	0.154725	406	418	0.0338878	csri8a
CSRI.f0541	0.100101	1.9962	0.046077	956	685	0.0337539	csri29
Motor.f0208	0.0999064	-3.4139	0.000645721	2739	2037	0.0336885	chorealle,chorlle
PBAHD.f0732	0.0997642	-0.535046	0.593642	70	48	0.0336405	pbal14fr
Motor.f0207	0.0989548	-3.38167	0.00072625	2739	2038	0.0333675	chorearle,chorrle
CareQoL.f0444	0.0979733	0.945942	0.344802	154	214	0.0330366
Physio.f0324	0.0976984	0.91617	0.360159	156	226	0.0329439	scst
CSRI.f0585	0.0975785	-1.63355	0.10262	588	592	0.0329035	csri51
CSRI.f0539	0.0966971	1.93005	0.0537731	957	686	0.0326063	csri28
SF.f0841	0.0961982	-1.42021	0.155901	489	395	0.032438	mh01,nervous
CSSRS.f0922	0.095636	1.0933	0.274898	190	227	0.0322485	sbh7
CareQoL.f0408	0.0935167	0.88714	0.375585	154	215	0.0315338
CSRI.f0491	0.0931322	1.61758	0.106021	590	593	0.0314042	csri11
PBAHD.f0711	0.09284	-0.49801	0.61942	70	48	0.0313056	pbal4sv
HDCC.f0066	0.0918608	-1.77365	0.0763187	900	636	0.0309755	ccvab,violent
CSRI.f0488	0.0918065	1.58671	0.112846	591	592	0.0309571	csri10
Cognitive.f0238	0.0912746	-2.29649	0.0217276	1225	1356	0.0307778	scnt2
HDCC.f0062	0.0909055	-1.75187	0.0799955	899	634	0.0306533	ccdep,depression
PBAHD.f0733	0.0893772	-0.477856	0.633659	69	48	0.030138	pbal15sv
PBAs.f0355	0.0892318	-1.73963	0.0821036	718	989	0.030089	bashallfre,pbas10fr
SF.f0850	0.0882904	-1.30268	0.193024	487	394	0.0297715	gh02,sick
CareQoL.f0443	0.088117	0.845676	0.398285	154	215	0.0297131
HDCC.f0086	0.0879901	1.71231	0.0870348	967	627	0.0296703	majorsymptomrater,sxraterm
PBAs.f0349	0.0878617	-1.7227	0.0851247	718	989	0.029627	bashall,pbas10sv
Behaviour.f0908	0.0876306	-2.03396	0.0420664	1583	799	0.029549	compulfr
CareQoL.f0456	0.087136	0.812468	0.417069	148	208	0.0293822
MHx.f0107	0.0867363	1.37218	0.170285	704	403	0.0292475	druguse,hxdrugab
CareQoL.f0409	0.0866425	0.818133	0.413813	153	215	0.0292158
CareQoL.f0437	0.0865842	0.826837	0.408868	153	215	0.0291962
SF.f0844	0.0865752	-1.28202	0.20017	489	399	0.0291932	energy,energy_sf36,vt02
CSRI.f0546	0.0863137	0.995836	0.31983	238	246	0.029105	csri31a
Behaviour.f0898	0.0862651	1.99112	0.0465807	1596	801	0.0290886	anxifr
PBAHD.f0727	0.0855546	-0.457841	0.647923	70	48	0.028849	pbal12sv
SF.f0845	0.08536	-1.26117	0.207579	491	393	0.0287834	downheart,mh04
CareQoL.f0422	0.0842098	0.799097	0.424753	153	215	0.0283956
Cognitive.f0234	0.0839982	2.20781	0.0273456	1206	1364	0.0283242	verfct6
Care.f0870	0.0838217	-1.47999	0.139106	886	484	0.0282647	crgvr7
MMSE.f0311	0.0829607	0.999057	0.318166	235	372	0.0279744
CareQoL.f0447	0.0828525	0.801493	0.423366	153	215	0.0279379
PBAHD.f0721	0.082841	-0.443691	0.658093	70	48	0.027934	pbal9sv
PBAHD.f0720	0.0828357	-0.44364	0.658129	70	48	0.0279322	pbal8fr
Physio.f0322	0.0822942	0.771181	0.441079	156	226	0.0277496	tug
SF.f0370	0.0822383	-1.53518	0.124965	696	707	0.0277307	mcs,mcsum
CSSRS.f0269	0.0819609	-0.533002	0.594736	81	89	0.0276372	int6
CareQoL.f0405	0.0818362	-0.768484	0.442703	150	212	0.0275952
CSRI.f0461	0.0809409	-1.61814	0.105824	959	684	0.0272933	csri2
CSRI.f0587	0.0807232	-1.36204	0.173445	587	593	0.0272199	csri52
PBAHD.f0749	0.080698	0.430601	0.667557	70	48	0.0272114	pbal23sv
CareQoL.f0410	0.08067	0.767362	0.443361	153	215	0.0272019
SF.f0859	0.0802232	1.17909	0.238682	478	397	0.0270513	sf,sf_nbs
CareQoL.f0440	0.0797677	0.747838	0.455041	152	214	0.0268977
PBAHD.f0722	0.0797291	-0.427371	0.669901	70	48	0.0268847	pbal9fr
CSSRS.f0272	0.0797291	-1.14311	0.253302	424	460	0.0268846	sbh2
HDCC.f0063	0.0781591	-1.29647	0.195079	640	482	0.0263553	ccdepage,depressage
PBAHD.f0708	0.0770222	-0.414003	0.679637	70	48	0.0259719	pbal2fr
PBAs.f0327	0.076518	-1.50783	0.131785	700	981	0.0258019	irascore
SF.f0363	0.0763068	1.50564	0.132363	757	792	0.0257307	bp,bp_nbs,bpsubscore
Summary.f0780	0.076172	-1.964	0.0496235	1856	1115	0.0256852	dxentire
PBAHD.f0706	0.075774	-0.4066	0.685051	70	48	0.025551	pbal1fr
CSSRS.f0268	0.0744523	0.485608	0.627878	82	88	0.0251053	int5
CSRI.f0460	0.0741579	1.03791	0.299675	343	350	0.025006	csri1b
CSRI.f0550	0.0738924	-0.904908	0.365856	275	365	0.0249165	csri33a
PBAHD.f0745	0.0725209	0.387521	0.699081	70	48	0.024454	pbal21sv
PBAHD.f0726	0.0719966	0.384279	0.701475	70	48	0.0242772	pbal11fr
Motor.f0205	0.0719378	-2.45858	0.0139842	2739	2038	0.0242574	chorearue,chorrue
PBAHD.f0731	0.0716814	-0.383826	0.70181	70	48	0.024171	pbal14sv
HDCC.f0076	0.0713283	-1.1863	0.235753	649	482	0.0240519	cccogage,dementage
HDCC.f0081	0.0705019	1.34126	0.180028	966	629	0.0237732	raterestimate,sxest
PBAs.f0615	0.0702837	-1.04092	0.298145	354	727	0.0236997	bashallworst,pbas10wo
Motor.f0206	0.0700182	-2.39301	0.0167494	2739	2038	0.0236101	chorealue,chorlue
PBAs.f0606	0.0699845	1.0934	0.274463	354	726	0.0235988	basdeprworst,pbas1wo
Behaviour.f0889	0.0696355	-1.6175	0.105902	1602	803	0.0234811	biscore
CSRI.f0459	0.0696188	-0.853968	0.393416	346	352	0.0234754	csri1a
PBAHD.f0724	0.0687851	0.368448	0.713211	70	48	0.0231943	pbal10fr
HDCC.f0064	0.0686462	-1.32464	0.185487	901	635	0.0231475	ccirb,irritability
Medical.f0138	0.0685858	-0.855737	0.392467	306	329	0.0231271	packy
PBAHD.f0705	0.0677231	0.362237	0.717834	70	48	0.0228362	pbal1sv
CareQoL.f0453	0.0665148	0.628304	0.530197	153	215	0.0224288
Behaviour.f0911	0.0663004	-1.56232	0.118345	1598	801	0.0223565	delussv
Care.f0885	0.0654811	1.14585	0.252057	886	482	0.0220802	crgvr22
SF.f0810	0.0654227	0.683947	0.494236	568	131	0.0220605	sf29
SF.f0381	0.065042	0.820972	0.411961	267	391	0.0219322
PBAHD.f0746	0.0649661	-0.348194	0.728326	70	48	0.0219066	pbal21fr
CSRI.f0512	0.0645799	-1.09682	0.272942	587	593	0.0217764	csri18
PBAs.f0346	0.0645624	-1.29833	0.194349	714	989	0.0217704	basobscompfre,pbas8fr
CSRI.f0517	0.0641971	0.628586	0.530016	156	208	0.0216473	csri19b
Cognitive.f0258	0.0640834	1.59705	0.110385	1171	1263	0.0216089	verflt07
CareQoL.f0417	0.0639196	0.595748	0.551713	152	215	0.0215537
Enrollment.f0095	0.0635988	-1.00615	0.314565	699	403	0.0214455	fhx
Behaviour.f0899	0.0634652	1.46888	0.141997	1596	801	0.0214005	anxisv
HADS.f0385	0.0629438	1.21134	0.225958	733	751	0.0212246	irrscore
SF.f0799	0.0629422	0.635209	0.525504	562	126	0.0212241	sf18
Care.f0887	0.062762	1.10334	0.270073	884	482	0.0211634	crgvr24
CSRI.f0545	0.0627374	-1.25311	0.210343	955	685	0.0211551	csri31
MMSE.f0300	0.0627325	0.741838	0.458473	235	373	0.0211534
PBAs.f0340	0.0617295	-1.24429	0.213565	719	989	0.0208152	basbehfre,pbas5fr
CareQoL.f0431	0.0615432	-0.580429	0.561984	153	214	0.0207524
CSRI.f0569	0.0609541	-1.03459	0.301071	587	592	0.0205537	csri43
Cognitive.f0242	0.060696	-1.58059	0.114096	1223	1337	0.0204667	swrt2
CareQoL.f0395	0.0594282	-0.601426	0.547931	154	212	0.0200392
CareQoL.f0436	0.0593138	0.555984	0.578561	153	215	0.0200006
CSRI.f0471	0.0591596	0.23295	0.816556	30	35	0.0199486	csri5a
Behaviour.f0888	0.0585293	-1.32138	0.186507	1507	760	0.0197361	behscore
SF.f0861	0.0576775	-0.837914	0.402314	471	384	0.0194488	mh,mh_nbs
SF.f0818	0.0575637	-0.861197	0.389358	499	406	0.0194105	general,general_sf36,gh01
SF.f0816	0.0572829	0.588467	0.556414	552	130	0.0193158	sf35
PBAHD.f0728	0.0565723	-0.303112	0.762347	70	48	0.0190762	pbal12fr
HADS.f0386	0.0565425	1.09012	0.275838	725	761	0.0190661	outscore,outwardirrscore
HDCC.f0072	0.0560817	-1.08504	0.278073	903	638	0.0189107	ccpsy,psychosis
HDCC.f0071	0.0559448	-0.830928	0.406239	478	406	0.0188646	ccpobage,obsessage
SF.f0837	0.0558967	-0.831245	0.406057	494	403	0.0188484	extent,sf01
PBAs.f0345	0.0556833	-1.12157	0.262203	714	989	0.0187764	basobscomp,pbas8sv
CSRI.f0494	0.0553219	0.967708	0.333389	589	594	0.0186545	csri12
Medical.f0140	0.0551965	0.736257	0.461803	286	469	0.0186123	cafpd
MMSE.f0299	0.0547611	0.644273	0.519642	235	373	0.0184654
PBAs.f0607	0.0545131	-0.820334	0.412207	353	727	0.0183818	bassuicworst,pbas2wo
CSRI.f0530	0.0543176	1.00424	0.315469	589	594	0.0183159	csri24
CSSRS.f0267	0.0542873	0.352739	0.724721	82	90	0.0183057	int4
Medical.f0141	0.0538066	1.52844	0.126507	1429	1612	0.0181436	drugab
SF.f0849	0.0528997	0.784364	0.433035	492	399	0.0178378	interferesocial,sf02
Cognitive.f0656	0.0528496	-0.535947	0.592275	254	173	0.0178209	hvltd
SF.f0367	0.0524466	1.01947	0.308143	754	774	0.017685	re,re_nbs,resubscore
CSRI.f0558	0.0523662	0.314376	0.753684	61	87	0.0176579	csri37a
HDCC.f0084	0.0517674	-0.992993	0.320869	938	606	0.017456	majorsymptomsubject,sxsubjm
CSRI.f0501	0.0515957	-0.219751	0.826714	37	34	0.0173981	csri14a
SF.f0857	0.0515826	0.747802	0.454786	474	380	0.0173936	gh,gh_nbs
Medical.f0139	0.0514382	0.781364	0.434774	372	628	0.0173449	cafab
PBAHD.f0734	0.0509581	-0.27229	0.785887	69	48	0.0171831	pbal15fr
Enrollment.f0100	0.0504001	-0.493431	0.621987	223	168	0.0169949
Cognitive.f0239	0.0501024	1.27117	0.203781	1225	1356	0.0168945	scnt3
SF.f0858	0.0500878	0.726571	0.467688	472	382	0.0168896	vt,vt_nbs
CareQoL.f0407	0.0498689	0.468943	0.639389	154	215	0.0168158
MMSE.f0313	0.0497857	0.564212	0.572819	235	372	0.0167877
HADS.f0387	0.0494394	0.946321	0.34414	724	752	0.016671	inwardirrscore,inwscore
CSRI.f0559	0.0492993	-0.837146	0.402681	587	591	0.0166237	csri38
PBAHD.f0712	0.0490718	-0.262656	0.793281	70	48	0.016547	pbal4fr
PBAs.f0328	0.0490284	-0.957893	0.338255	699	979	0.0165324	psyscore
CareQoL.f0426	0.0484036	-0.459762	0.645959	154	215	0.0163217
SF.f0815	0.0470037	0.486987	0.626424	553	130	0.0158496	sf34
PBAHD.f0723	0.0468542	0.251131	0.802157	70	48	0.0157992	pbal10sv
CareQoL.f0432	0.0463047	0.43645	0.66277	151	214	0.015614
SF.f0366	0.0450837	0.888828	0.374233	759	795	0.0152022	sf,sf_nbs,sfsubscore
Cognitive.f0230	0.0449579	1.09696	0.272769	1190	1207	0.0151598	sdmt2
SF.f0835	0.0448627	0.659398	0.509813	491	389	0.0151277	emotionacc,re02
HDCC.f0067	0.0447708	-0.544936	0.586001	334	265	0.0150967	ccvabage,violentage
CSRI.f0506	0.0446646	-0.892747	0.372124	957	685	0.0150609	csri16
CareQoL.f0429	0.0444855	-0.415705	0.677869	153	215	0.0150005
Behaviour.f0890	0.044234	0.749292	0.453834	620	539	0.0149157	behaviour_depscore
CSRI.f0589	0.0442179	-0.882992	0.377371	954	683	0.0149103	csri53
SF.f0856	0.0441745	0.648885	0.516584	476	395	0.0148956	bp,bp_nbs
Cognitive.f0247	0.0441408	1.08262	0.279086	1183	1226	0.0148843	sit3
PBAs.f0610	0.0440587	-0.678759	0.497436	355	727	0.0148566	basbehworst,pbas5wo
HDCC.f0060	0.0439906	-0.836844	0.402811	898	629	0.0148336	ccmtr,motor
SF.f0808	0.0436289	0.454277	0.649771	567	131	0.0147117	sf27
CSRI.f0479	0.0435993	-0.871823	0.383432	958	685	0.0147017	csri7
CareQoL.f0434	0.0431541	-0.404613	0.686	151	215	0.0145516
Behaviour.f0902	0.0428531	-0.993951	0.320347	1590	801	0.0144501	aggrfr
Cognitive.f0254	0.0426069	-0.734689	0.46267	643	577	0.0143671	trialb_error,trlb3
PBAs.f0339	0.0421295	-0.851858	0.394413	719	989	0.0142061	basbeh,pbas5sv
Cognitive.f0232	0.04154	-0.940324	0.34714	1207	1365	0.0140073	verfctd
PBAs.f0609	0.0410568	-0.627624	0.530383	355	727	0.0138443	basirritworst,pbas4wo
CSSRS.f0262	0.0398254	-0.202885	0.839629	52	52	0.0134291	sid4
SF.f0805	0.039013	0.414852	0.678379	566	131	0.0131552	sf24
PBAs.f0331	0.0388327	0.795067	0.426685	718	989	0.0130944	basdepr,pbas1sv
CSRI.f0482	0.0388269	-0.775688	0.438045	957	685	0.0130924	csri8
CSSRS.f0264	0.0388032	-0.259722	0.795375	87	95	0.0130845	int1
SF.f0853	0.0384205	-0.563846	0.573004	488	387	0.0129554	excellent,gh05
MHx.f0103	0.0383939	-0.616264	0.537845	717	405	0.0129464	hxtobab,smoking,smoking_hx
Care.f0886	0.0376708	0.662847	0.50754	884	484	0.0127026	crgvr23
CSRI.f0500	0.0370784	0.640998	0.521649	589	594	0.0125028	csri14
CareQoL.f0404	0.0368309	-0.349213	0.72713	154	215	0.0124194
SF.f0817	0.0361321	0.369236	0.712067	549	130	0.0121838	sf36
CSRI.f0536	0.0355608	0.709679	0.478004	955	684	0.0119911	csri26
Behaviour.f0910	0.0348508	-0.813801	0.41584	1597	802	0.0117517	delusfr
HDCC.f0073	0.0344817	-0.247255	0.804958	113	94	0.0116272	ccpsyage,psychage
CSRI.f0497	0.0333158	0.587944	0.556682	588	595	0.0112341	csri13
CSRI.f0533	0.0331623	0.585009	0.558654	589	594	0.0111823	csri25
CSRI.f0527	0.0330998	0.583546	0.559637	589	593	0.0111613	csri23
Enrollment.f0647	0.0329456	0.417936	0.67612	476	235	0.0111093
CareQoL.f0394	0.0327224	0.310866	0.756079	154	215	0.011034
SF.f0847	0.0324194	-0.47779	0.632918	489	394	0.0109318	happy,mh05
CSRI.f0573	0.0320714	0.554071	0.579636	586	591	0.0108145	csri45
CSRI.f0521	0.0306689	0.287842	0.773641	148	197	0.0103415	csri21
Behaviour.f0901	0.0293947	0.676773	0.498615	1595	802	0.0099119	suicsv
CSSRS.f0278	0.0292081	0.439235	0.660599	424	460	0.00984897	sbh6
CareQoL.f0439	0.029187	-0.27881	0.780548	154	213	0.00984184
Cognitive.f0243	0.0291179	-0.726544	0.467572	1222	1337	0.00981855	swrt3
CSRI.f0472	0.0286847	0.122968	0.902512	30	37	0.00967247	csri5b
HDCC.f0056	0.0286267	-0.54193	0.587947	915	589	0.00965292	momhd
HDCC.f0085	0.027934	-0.536434	0.591736	943	606	0.00941935	majorsymptomfamily,sxfamm
PBAs.f0613	0.0276933	-0.421752	0.67329	354	727	0.00933817	basobscompworst,pbas8wo
PBAs.f0338	0.0274867	-0.55418	0.579528	719	989	0.00926852	basirritfre,pbas4fr
CSRI.f0487	0.0269325	0.283518	0.776908	202	258	0.00908165	csri9b
CareQoL.f0416	0.0265814	-0.252749	0.800605	151	214	0.00896324
Medical.f0136	0.0264699	-0.362254	0.717264	403	348	0.00892565	alcunits
SF.f0846	0.0263608	0.387288	0.698638	487	389	0.00888886	vt03,wornout
PBAs.f0332	0.026356	-0.533129	0.594014	718	989	0.00888724	basdeprfre,pbas1fr
CSRI.f0480	0.026209	0.122673	0.902682	34	46	0.00883767	csri7a
SF.f0809	0.0254822	0.265106	0.791006	567	131	0.0085926	sf28
SF.f0843	0.0251728	-0.371769	0.710154	491	394	0.00848826	calm,mh03
PBAs.f0608	0.0250497	0.384607	0.700605	354	726	0.00844676	basanxworst,pbas3wo
Behaviour.f0903	0.0248504	-0.574171	0.565906	1591	801	0.00837954	aggrsv
PBAs.f0614	0.0240337	0.37664	0.706515	355	726	0.00810416	basdelworst,pbas9wo
CareQoL.f0454	0.023455	-0.216664	0.828596	149	204	0.00790902
CSSRS.f0260	0.0228636	0.340491	0.733568	424	460	0.0077096	sid2
Care.f0882	0.022716	-0.400202	0.689071	878	479	0.00765983	crgvr19
CareQoL.f0448	0.0220572	0.209754	0.833977	152	215	0.0074377
CSRI.f0511	0.0215919	-0.102152	0.918795	45	86	0.00728078	csri17b
CSRI.f0555	0.0214754	-0.428652	0.668233	952	684	0.0072415	csri36
Care.f0884	0.02116	0.373827	0.708591	887	483	0.00713514	crgvr21
HDCC.f0080	0.0210674	0.410361	0.681596	964	628	0.00710392	hddiagn,hddiagnosed
Care.f0881	0.0207714	0.358404	0.720098	856	459	0.00700412	crgvr18
MHx.f0102	0.0207463	-0.332244	0.739768	701	402	0.00699564	alcoholabuse,hxalcab
CSRI.f0562	0.0201218	0.109604	0.91289	44	90	0.00678508	csri39a
SF.f0813	0.0197644	0.202875	0.839292	567	130	0.00666454	sf32
PBAs.f0348	0.0195427	-0.396221	0.691991	718	987	0.00658981	basdelfre,pbas9fr
Medical.f0137	0.0193892	0.533924	0.593433	1427	1609	0.00653804	tobab
CareQoL.f0449	0.0185597	-0.177402	0.859291	153	215	0.00625833
CSRI.f0470	0.0185362	-0.370953	0.71072	961	686	0.0062504	csri5
PBAs.f0326	0.0184532	-0.36998	0.711444	697	978	0.00622241	depscore
SF.f0839	0.0181582	-0.268036	0.788735	487	395	0.00612293	bp02,interferework
SF.f0838	0.0175848	0.262227	0.793206	495	402	0.00592959	bodypain,bp01
PBAs.f0333	0.0173028	0.35442	0.723068	719	988	0.00583451	bassuic,pbas2sv
HDCC.f0078	0.0172663	0.330435	0.741117	926	606	0.00582218	sxsubj,symptomssubject
PBAHD.f0719	0.0170748	-0.0911655	0.927518	70	48	0.00575761	pbal8sv
Behaviour.f0900	0.016904	0.390601	0.696127	1595	802	0.00570004	suicfr
Cognitive.f0231	0.0163572	0.422797	0.672477	1266	1437	0.00551563	verfct
CareQoL.f0397	0.015956	0.150429	0.880509	154	213	0.00538037
PBAs.f0347	0.0159265	-0.323408	0.746426	718	987	0.00537041	basdel,pbas9sv
Cognitive.f0222	0.0157525	0.406848	0.684152	1267	1436	0.00531174	gen1
HADS.f0383	0.0155613	0.299113	0.764896	731	750	0.00524726	anxscore
Behaviour.f0904	0.0154668	-0.358843	0.719744	1597	801	0.00521542	irritfr
CSSRS.f0273	0.0143008	-0.211576	0.832486	424	460	0.00482225	sbh3
HDCC.f0057	0.014244	0.169664	0.865333	351	238	0.00480307	momagesx
MHx.f0104	0.0135766	-0.0864886	0.931185	88	76	0.00457803	cigperday,hxtobcpd,numbercigarettes
PBAHD.f0707	0.013127	0.0703859	0.944008	70	48	0.00442642	pbal2sv
Care.f0883	0.013093	-0.231977	0.81659	885	482	0.00441497	crgvr20
CSRI.f0484	0.0123151	0.172347	0.863207	405	418	0.00415265	csri8b
CareQoL.f0425	0.0123087	0.117305	0.906683	154	215	0.0041505
PBAs.f0336	0.0117719	-0.239809	0.810507	718	988	0.00396948	basanxfre,pbas3fr
CSSRS.f0277	0.0117061	0.174318	0.861655	424	458	0.0039473	sbh5
HDCC.f0058	0.0116433	0.219443	0.826335	902	586	0.00392612	dadhd
SF.f0811	0.0112879	-0.116831	0.907028	568	131	0.00380627	sf30
HDCC.f0082	0.0112868	-0.217866	0.827562	942	618	0.00380591	sxrater
HDCC.f0065	0.0109423	0.168694	0.866072	556	415	0.00368973	ccirbage,irritage
Cognitive.f0235	0.0108368	0.274505	0.783719	1206	1364	0.00365417	verfct7
CSSRS.f0270	0.0104355	0.155302	0.876619	424	460	0.00351885	sbh1
PBAHD.f0725	0.0102453	-0.0549205	0.956296	70	48	0.00345473	pbal11sv
Care.f0880	0.00973427	-0.170594	0.864569	869	470	0.0032824	crgvr17
HDCC.f0069	0.00953815	-0.157594	0.874805	622	485	0.00321626	apathyage,ccaptage
Cognitive.f0257	0.00914327	-0.225492	0.821616	1172	1263	0.00308311	verflt06
HDCC.f0083	0.00910417	-0.161248	0.871924	701	568	0.00306993	sxestcfd
CareQoL.f0396	0.00885597	0.0940087	0.925155	150	212	0.00298623
SF.f0812	0.00874488	-0.0915151	0.92711	568	131	0.00294877	sf31
PBAs.f0358	0.00819504	0.170044	0.864995	735	995	0.00276337	basrelative,pbainfo
CSSRS.f0275	0.0075552	0.112585	0.910385	424	459	0.00254761	sbh4
PBAs.f0334	0.00696074	0.141672	0.887356	718	987	0.00234716	bassuicfre,pbas2fr
SF.f0852	0.0066935	0.0985552	0.921514	490	391	0.00225705	gh04,worse
Behaviour.f0905	0.0060644	0.140182	0.888528	1598	801	0.00204492	irritsv
PBAs.f0335	0.00600274	-0.122092	0.90284	718	988	0.00202413	basanx,pbas3sv
CSRI.f0565	0.00573609	0.114496	0.908859	953	685	0.00193421	csri41
CSRI.f0553	0.00534357	-0.106223	0.915419	945	679	0.00180185	csri35
SF.f0365	0.00518765	0.101534	0.91914	750	773	0.00174928	vt,vt_nbs,vtsubscore
CareQoL.f0438	0.00498116	-0.0472127	0.962369	154	214	0.00167965
MMSE.f0314	0.00490219	-0.0591364	0.952863	235	372	0.00165302
HDCC.f0077	0.00445377	0.0681838	0.945653	373	629	0.00150181	hxsid
CSSRS.f0259	0.00440464	0.065448	0.947832	424	460	0.00148524	sid1
CareQoL.f0452	0.00399086	0.0375733	0.970048	153	215	0.00134572
SF.f0364	0.00348232	-0.0683461	0.945519	755	782	0.00117424	gh,gh_nbs,ghsubscore
Behaviour.f0919	0.00339309	0.0767757	0.938809	1532	769	0.00114415	deprrfr
HDCC.f0061	0.00241166	-0.0463219	0.96306	894	629	0.000813212	ccmtrage,motorage
CareQoL.f0446	0.00234715	-0.0223195	0.982205	154	214	0.00079146
PBAs.f0337	0.0020604	0.0417032	0.96674	719	989	0.000694767	basirrit,pbas4sv
HDCC.f0059	0.00189191	-0.0217593	0.982648	335	220	0.000637951	dadagesx
Cognitive.f0665	0.00153579	0.0211348	0.983144	434	336	0.000517867	mdrs
Enrollment.f0098	0.000892146	-0.0142606	0.988625	699	403	0.000300832
HDCC.f0079	0.000801534	0.0153565	0.98775	934	605	0.000270277	sxfam,symptomsfamily
CSRI.f0473	0.00016036	0.00320894	0.99744	960	687	5.40735e-05	csri6

## Sheet: cons_states_8_9
var	d	t_val	p_val	#samples_st8	#samples_st9	d_normalized	var_name
Functional.f0219	1.75251	59.5893	0	2077	2600	0.455302	fascore,functionscore
Functional.f0220	1.74971	60.3063	0	2145	2656	0.454574	fiscore
Functional.f0213	1.70669	59.8348	0	2232	2710	0.443399	functionalscore,tfcscore
Functional.f0221	1.57884	54.2898	0	2159	2657	0.410182	indepencescale,indepscl
Motor.f0179	1.50598	-52.4774	0	2240	2651	0.391254	motorscore,motscore
Motor.f0180	1.46875	-51.6176	0	2266	2719	0.38158	miscore
Functional.f0217	1.42409	49.8819	0	2235	2711	0.369978	adl,fcadl
Motor.f0191	1.26661	-44.4975	0	2271	2703	0.329064	prosuphandsright,prosupr
GCI.f0863	1.24975	-33.3099	5.88237e-206	1510	1360	0.324686	svrtyll
Functional.f0216	1.24284	43.6551	0	2233	2710	0.32289	chores,fcdomestic
Motor.f0192	1.23434	-43.3658	0	2271	2703	0.320681	prosuphandsleft,prosupl
Motor.f0210	1.2071	-42.4782	0	2269	2714	0.313604	tandem,tandemwalk
Motor.f0209	1.20233	-42.2423	0	2267	2717	0.312366	gait
oculo.score	1.19409	-41.8882	0	2269	2689	0.310224
Motor.f0211	1.18871	-41.7199	0	2263	2707	0.308827	retpulltest,retropls
finger.score	1.18441	-41.6299	0	2271	2708	0.30771
Motor.f0187	1.1517	-40.5068	0	2272	2721	0.299211	dysarth,dysarthria
Motor.f0190	1.1345	-39.877	5.22722e-302	2271	2708	0.294742	fingertapsleft,fingtapl
Motor.f0189	1.10718	-38.9193	1.62339e-289	2272	2708	0.287646	fingertapsright,fingtapr
Cognitive.f0241	1.06586	29.467	3.54802e-168	1581	1474	0.27691	stroop_correct,swr_correct,swrt1
Motor.f0185	1.0177	-35.7038	1.13848e-248	2269	2690	0.264398	sacvelh,sacvelocityhor
Motor.f0182	1.00652	-35.3656	1.37072e-244	2272	2703	0.261495	ocularv,ocupursuitver
Motor.f0181	1.00051	-35.1519	5.72163e-242	2272	2703	0.259933	ocularh,ocupursuithor
Cognitive.f0237	0.991368	27.6742	7.43915e-151	1605	1500	0.257557	scnt1
CSRI.f0578	0.976318	3.87098	0.000263251	30	34	0.253647	csri47a
Functional.f0218	0.962571	33.6428	1.28053e-223	2235	2711	0.250076	carelevl,fccarelevel
Cognitive.f0654	0.957695	9.9298	6.2219e-22	627	136	0.248809	cogscore
Motor.f0186	0.955479	-33.5205	3.19662e-222	2269	2690	0.248233	sacvelocityver,sacvelv
Motor.f0184	0.951919	-33.4327	3.16905e-221	2270	2700	0.247308	sacinitiationver,sacinitv
Motor.f0183	0.913342	-32.0738	2.60116e-205	2270	2699	0.237286	sacinith,sacinitiationhor
Cognitive.f0229	0.912146	22.6644	7.28105e-104	1481	1101	0.236976	sdmt_correct,sdmt1
MMSE.f0291	0.909689	8.94787	6.51753e-18	157	361	0.236337	mmsetotal
Cognitive.f0248	0.883525	17.0493	2.68295e-60	587	1117	0.22954	trl
Physio.f0322	0.88325	6.60313	1.81084e-10	95	209	0.229468	tug
Motor.f0188	0.849679	-29.868	1.85115e-180	2271	2711	0.220747	tongue,tonprotrusion
SF.f0797	0.843321	6.6995	5.43685e-11	438	85	0.219095	sf16
Cognitive.f0668	0.832044	6.37527	9.82415e-10	158	75	0.216165	mdrs3
Functional.f0215	0.824943	28.9989	6.60905e-171	2239	2712	0.21432	fcfinances,finances,finances_tfc
Cognitive.f0670	0.781998	5.94564	1.00935e-08	158	75	0.203163	mdrs5
Motor.f0193	0.781311	-27.4513	1.3661e-154	2267	2705	0.202985	luria
Cognitive.f0250	0.779541	11.9252	1.82265e-30	456	413	0.202525	trla2
brady.score	0.773788	-27.1816	8.22158e-152	2268	2707	0.20103
Motor.f0196	0.773788	-27.1816	8.22158e-152	2268	2707	0.20103	bradkinbody,brady
MMSE.f0320	0.761617	7.95548	1.10843e-14	162	364	0.197868
SF.f0790	0.750448	5.6717	2.34646e-08	438	85	0.194966	sf9
Care.f0867	0.721888	-12.3932	2.25465e-33	769	498	0.187547	crgvr4
Cognitive.f0245	0.720066	18.2169	5.35028e-70	1530	1152	0.187073	sit1
WPAI.f0600	0.706506	-6.2679	1.10205e-09	109	235	0.18355
WPAI.f0594	0.706506	-6.2679	1.10205e-09	109	235	0.18355	wpaiscr4
Cognitive.f0660	0.700876	5.07176	7.11198e-07	194	93	0.182088	hvlt1
SF.f0794	0.699492	5.23281	2.42238e-07	441	83	0.181728	sf13
Cognitive.f0244	0.69576	16.654	2.78465e-59	976	1654	0.180759	sit
Cognitive.f0249	0.688591	-10.2079	3.5606e-23	455	410	0.178896	traila_time,trla1
SF.f0795	0.680352	5.35857	1.26351e-07	438	83	0.176755	sf14
Cognitive.f0233	0.679137	15.8496	9.7617e-54	906	1363	0.17644	verfct5
SF.f0789	0.678115	4.94454	1.0316e-06	438	84	0.176174	sf8
Care.f0864	0.673358	-11.3586	1.52291e-28	772	499	0.174938	crgvr1
MMSE.f0305	0.647715	6.72579	4.46656e-11	163	378	0.168276
SF.f0796	0.644729	5.5002	5.9686e-08	437	83	0.167501	sf15
PBAs.f0356	0.642911	-11.8223	4.64081e-31	532	1185	0.167028	basorient,pbas11sv
Cognitive.f0669	0.632526	5.37273	1.89063e-07	158	75	0.16433	mdrs4
rigidity.score	0.628182	-22.0793	3.82039e-103	2271	2714	0.163202
Motor.f0195	0.614	-21.5861	7.20347e-99	2272	2715	0.159517	rigarml,rigarmsleft
PBAs.f0357	0.613251	-11.4548	2.5178e-29	531	1185	0.159323	basorientfre,pbas11fr
SF.f0854	0.613201	7.86149	1.52541e-14	366	304	0.15931	pf,pf_nbs
Cognitive.f0255	0.611237	14.5806	2.28878e-46	977	1655	0.158799	verflt
CSRI.f0575	0.611169	-12.0941	3.18777e-32	752	779	0.158782	csri46
Motor.f0194	0.603235	-21.2036	1.31951e-95	2271	2715	0.15672	rigarmr,rigarmsright
Enrollment.f0645	0.598284	-8.26197	7.33926e-16	410	281	0.155434
SF.f0825	0.591779	7.67856	5.35808e-14	392	318	0.153744	bending,pf06
SF.f0828	0.586667	7.76496	2.89126e-14	387	318	0.152416	pf09,walkingo
CSRI.f0547	0.586615	-11.3809	7.3763e-29	744	779	0.152403	csri32
Care.f0865	0.58536	-9.85577	3.93822e-22	772	499	0.152077	crgvr2
Physio.f0324	0.581114	4.4638	1.13709e-05	95	210	0.150973	scst
SF.f0829	0.578243	7.60672	8.94476e-14	392	320	0.150227	bathing,pf10
Cognitive.f0228	0.574252	13.8733	2.79627e-42	976	1639	0.149191	digit,sdmt
Cognitive.f0659	0.569639	4.53707	8.38347e-06	196	94	0.147992	hvltt31
SF.f0792	0.568987	4.65328	4.14144e-06	441	86	0.147823	sf11
PBAHD.f0706	0.562843	2.92032	0.00425749	57	53	0.146227	pbal1fr
PBAHD.f0705	0.558518	2.92047	0.00425553	57	53	0.145103	pbal1sv
PBAs.f0616	0.55567	-7.5362	1.0232e-13	264	815	0.144363	basorientworst,pbas11wo
SF.f0793	0.554524	4.50883	8.04618e-06	441	86	0.144065	sf12
Behaviour.f0917	0.54727	-12.6492	1.88699e-35	1250	948	0.142181	dement
dystonia.score	0.545267	-19.1416	7.35236e-79	2265	2709	0.14166
Cognitive.f0658	0.543681	4.36141	1.8016e-05	196	94	0.141248	hvltt21
SF.f0788	0.542457	3.75318	0.000194401	435	84	0.14093	sf7
MMSE.f0318	0.537791	5.35526	1.26512e-07	165	378	0.139718
Care.f0866	0.53759	-9.28792	6.62549e-20	771	498	0.139666	crgvr3
Cognitive.f0253	0.518274	6.84014	1.62915e-11	407	354	0.134647	trlb2
Cognitive.f0225	0.51533	-2.37654	0.0197773	40	45	0.133883	gen4
SF.f0824	0.514399	6.71586	3.85529e-11	392	314	0.133641	climbingo,pf05
Cognitive.f0666	0.513716	4.34238	2.11019e-05	158	75	0.133463	mdrs1
MMSE.f0294	0.512386	5.27115	1.95824e-07	165	381	0.133118
MMSE.f0292	0.510682	5.33188	1.42719e-07	165	381	0.132675
Cognitive.f0256	0.510073	13.5698	1.01619e-40	1617	1300	0.132517	verflt05
MMSE.f0317	0.5082	5.06858	5.51124e-07	165	378	0.13203
MMSE.f0307	0.506392	5.65483	2.53972e-08	160	378	0.131561
Cognitive.f0657	0.501628	4.04349	6.76631e-05	196	94	0.130323	hvltt11
MMSE.f0319	0.498364	4.94276	1.02836e-06	165	379	0.129475
SF.f0801	0.496062	3.57847	0.000378665	430	81	0.128877	sf20
PBAHD.f0759	0.494734	2.49612	0.0141116	57	50	0.128532	pbal28sv
Motor.f0199	0.49136	-17.2575	7.34985e-65	2266	2713	0.127655	dystlue,maxdyslue
SF.f0823	0.49108	6.37881	3.23256e-10	389	317	0.127582	climbings,pf04
PBAHD.f0708	0.488297	2.52311	0.0130888	57	53	0.12686	pbal2fr
MMSE.f0295	0.488258	5.05387	5.92589e-07	165	380	0.126849
CareQoL.f0425	0.482301	4.10551	4.98428e-05	106	260	0.125302
Cognitive.f0664	0.481773	-4.0895	5.63463e-05	193	93	0.125165	hvlt5
CSRI.f0571	0.48121	-9.5897	3.47052e-21	748	772	0.125018	csri44
CareQoL.f0408	0.480935	4.18073	3.6416e-05	107	260	0.124947
MMSE.f0321	0.475282	5.31827	1.55068e-07	162	367	0.123478
SF.f0800	0.470892	3.43894	0.000631916	430	81	0.122338	sf19
SF.f0826	0.470738	6.10983	1.64236e-09	394	319	0.122298	pf07,walkingm
Motor.f0197	0.469308	-16.4811	1.84489e-59	2265	2712	0.121926	dysttrnk,maxdystrunk
MMSE.f0306	0.468917	5.2076	2.72802e-07	162	378	0.121825
Summary.f0778	0.468667	12.5303	3.793e-35	1570	1437	0.12176	impwrsex
Motor.f0198	0.464267	-16.3061	2.82929e-58	2266	2713	0.120616	dystrue,maxdysrue
SF.f0791	0.463717	3.56403	0.000398514	441	86	0.120474	sf10
Cognitive.f0655	0.462512	5.48647	6.16584e-08	325	249	0.12016	hvlt
PBAHD.f0707	0.460172	2.387	0.0187252	57	53	0.119553	pbal2sv
MMSE.f0298	0.455127	4.66136	3.95926e-06	165	379	0.118242
MMSE.f0315	0.451648	4.77231	2.34664e-06	165	378	0.117338
Motor.f0201	0.446436	-15.6765	4.24124e-54	2266	2710	0.115984	dystlle,maxdyslle
Cognitive.f0667	0.446035	3.33659	0.00098825	158	75	0.11588	mdrs2
Motor.f0200	0.442081	-15.5236	4.15577e-53	2266	2710	0.114853	dystrle,maxdysrle
SF.f0827	0.441819	5.82903	8.46994e-09	391	319	0.114785	pf08,walkings
CSRI.f0576	0.438673	3.32883	0.000969776	69	266	0.113967	csri46a
PBAHD.f0709	0.438633	2.22272	0.0283185	57	53	0.113957	pbal3sv
SF.f0822	0.438625	5.7308	1.48317e-08	391	314	0.113955	lifting,pf03
MMSE.f0297	0.436473	4.29479	2.07235e-05	165	379	0.113396
Functional.f0214	0.421775	14.8345	9.68249e-49	2232	2710	0.109577	fcoccupation,occupatn
CareQoL.f0455	0.418941	3.52249	0.000483007	104	255	0.108841
Care.f0868	0.418423	-7.3064	4.84384e-13	770	497	0.108706	crgvr5
CSRI.f0585	0.412513	-6.53237	9.73697e-11	451	690	0.107171	csri51
MMSE.f0309	0.401852	4.46065	9.96493e-06	160	377	0.104401
Cognitive.f0236	0.398634	9.50706	4.26994e-21	976	1649	0.103565	scnt
MMSE.f0304	0.398044	3.90796	0.000104861	165	379	0.103412
Cognitive.f0665	0.395387	4.65652	4.00084e-06	325	250	0.102722	mdrs
CareQoL.f0436	0.391936	3.32821	0.000963268	107	259	0.101825
MMSE.f0293	0.390894	4.07887	5.20261e-05	165	381	0.101554
Cognitive.f0240	0.389684	9.34459	1.90482e-20	981	1652	0.10124	stroop,swrt
Physio.f0325	0.387933	2.76245	0.00622916	84	135	0.100785	scst1
CareQoL.f0407	0.383397	3.37831	0.000807734	107	261	0.0996064
MHx.f0105	0.382937	-2.59239	0.0102683	72	121	0.0994869	hxtobyos,smokyears
SF.f0821	0.382694	5.00833	6.93715e-07	393	318	0.0994239	activitiesm,pf02
Medical.f0136	0.381465	4.4303	1.1451e-05	213	316	0.0991046	alcunits
SF.f0804	0.380602	2.95544	0.00326756	431	78	0.0988805	sf23
CareQoL.f0453	0.379278	3.29913	0.00106613	107	257	0.0985363
PBAHD.f0760	0.375133	1.91494	0.0582207	57	50	0.0974595	pbal28fr
MMSE.f0301	0.372324	3.91265	0.000102923	164	379	0.0967298
CSRI.f0548	0.367787	-4.21098	2.87808e-05	210	485	0.095551	csri32a
CSRI.f0767	0.367558	-6.17938	8.82987e-10	645	544	0.0954915
SF.f0781	0.364644	2.8795	0.00415317	424	80	0.0947345	sfscore_v1
CSRI.f0580	0.364317	2.01425	0.0459405	41	98	0.0946496	csri48a
CSRI.f0501	0.364252	-1.54871	0.124461	33	74	0.0946326	csri14a
CSRI.f0467	0.363785	-5.87665	5.47145e-09	452	705	0.0945113	csri4
CareQoL.f0412	0.363277	3.14172	0.00181682	107	260	0.0943794
MMSE.f0302	0.362574	3.48294	0.000535993	165	379	0.0941966
MMSE.f0296	0.361942	3.91373	0.000102429	165	380	0.0940324
PBAHD.f0731	0.358034	-1.90765	0.0590928	57	53	0.0930173	pbal14sv
CareQoL.f0435	0.355845	3.08346	0.00220451	105	256	0.0924486
CSRI.f0581	0.355772	-5.6479	2.04929e-08	450	693	0.0924295	csri49
MMSE.f0303	0.355355	3.53683	0.000439656	165	379	0.0923212
CareQoL.f0418	0.353912	3.04795	0.0024739	106	257	0.0919462
HDCC.f0070	0.353657	-6.79606	1.54599e-11	635	868	0.09188	ccpob,obsessive
PBAHD.f0724	0.351888	1.83603	0.0691041	57	53	0.0914206	pbal10fr
SF.f0802	0.35145	2.79919	0.00531919	427	80	0.0913066	sf21
SF.f0862	0.351086	4.24226	2.5683e-05	333	260	0.091212	sfscore
SF.f0785	0.348123	-2.68384	0.00750832	440	86	0.0904424	sf4
PBAHD.f0732	0.347131	-1.85377	0.0665009	57	53	0.0901846	pbal14fr
MMSE.f0314	0.344614	3.25898	0.00118826	165	379	0.0895308
Behaviour.f0897	0.339525	7.59058	4.69177e-14	1251	929	0.0882086	guiltsv
MMSE.f0308	0.336476	3.70914	0.000229687	160	377	0.0874165
Behaviour.f0896	0.332234	7.43209	1.52735e-13	1251	929	0.0863145	guiltfr
CSRI.f0567	0.330225	-5.29077	1.46063e-07	450	688	0.0857924	csri42
SF.f0798	0.329672	2.59098	0.00984529	429	81	0.0856488	sf17
CareQoL.f0438	0.326349	-2.81074	0.00521006	107	259	0.0847855
PBAs.f0329	0.325488	-6.10887	1.23733e-09	532	1195	0.0845619	aptscore
CareQoL.f0420	0.32245	-2.74524	0.00634819	107	257	0.0837726
SF.f0361	0.320345	5.62223	2.32215e-08	542	712	0.0832257	pf,pf_nbs,pfsubscore
PBAHD.f0757	0.319167	-1.7538	0.082301	57	53	0.0829195	pbal27sv
SF.f0787	0.317196	2.71884	0.00677046	438	83	0.0824075	sf6
Summary.f0779	0.317153	8.47457	3.66587e-17	1566	1396	0.0823963	impwrssj
SF.f0799	0.314004	2.43041	0.0154268	429	81	0.0815782	sf18
CSSRS.f0269	0.313002	1.91289	0.0577473	76	70	0.081318	int6
PBAHD.f0723	0.308145	1.61094	0.110111	57	53	0.0800561	pbal10sv
CSRI.f0775	0.307186	-3.88661	0.00011187	280	385	0.0798068	csri60__1
Cognitive.f0231	0.304796	7.3285	3.08309e-13	976	1650	0.0791861	verfct
CSRI.f0510	0.301834	-1.67616	0.09597	49	91	0.0784166	csri17a
CareQoL.f0433	0.300303	-2.5777	0.0103385	107	259	0.0780187
SF.f0836	0.298729	3.88524	0.000112257	381	299	0.0776097	emotioncare,re03
CSRI.f0493	0.296404	1.4856	0.141	34	55	0.0770058	csri11b
SF.f0786	0.291555	-2.27399	0.0233802	431	82	0.075746	sf5
SF.f0835	0.290986	3.76942	0.000177911	381	298	0.0755982	emotionacc,re02
SF.f0860	0.289649	3.74173	0.000198498	373	296	0.0752508	re,re_nbs
CSRI.f0550	0.28864	-3.68447	0.000245826	276	469	0.0749887	csri33a
CareQoL.f0429	0.28848	-2.49351	0.013093	107	258	0.0749471
PBAs.f0359	0.286643	-5.14013	3.06857e-07	491	1179	0.0744697	bashousehold,pbahshd
CareQoL.f0409	0.286634	2.52683	0.0119314	107	260	0.0744676
CareQoL.f0451	0.285952	2.46936	0.013995	106	259	0.0742902
PBAHD.f0744	0.283448	1.4765	0.14272	57	53	0.0736397	pbal20fr
SF.f0831	0.282551	3.66453	0.000266864	385	305	0.0734068	physicacc,rp02
MMSE.f0310	0.280743	3.00117	0.00281325	165	379	0.072937
CareQoL.f0411	0.280418	2.40852	0.0165107	107	261	0.0728525
SF.f0834	0.279192	3.61867	0.000318283	377	299	0.0725341	emotioncut,re01
PBAHD.f0743	0.277679	1.44919	0.150183	57	53	0.072141	pbal20sv
CSRI.f0587	0.277648	-4.45028	9.41706e-06	451	690	0.072133	csri52
CareQoL.f0421	0.271876	2.39119	0.0173011	107	259	0.0706335
CSRI.f0502	0.271528	1.44126	0.152404	34	76	0.0705431	csri14b
PBAHD.f0747	0.270407	1.40661	0.162413	57	53	0.0702519	pbal22sv
CareQoL.f0428	0.270379	-2.3214	0.0208166	107	259	0.0702445
CSRI.f0569	0.269343	-4.34451	1.52091e-05	450	686	0.0699752	csri43
PBAHD.f0710	0.265485	1.38472	0.168993	57	53	0.0689731	pbal3fr
MMSE.f0316	0.265031	2.75693	0.00603179	165	378	0.068855
PBAs.f0344	0.259997	-4.94556	8.33181e-07	534	1191	0.0675473	baspersevfre,pbas7fr
SF.f0369	0.25994	4.37227	1.34104e-05	504	647	0.0675325	pcs,pcsum
CareQoL.f0419	0.255938	-2.18938	0.0292072	107	257	0.0664928
CareQoL.f0426	0.255886	-2.23495	0.0260266	107	259	0.0664792
CSRI.f0472	0.254429	-1.13085	0.261338	36	50	0.0661006	csri5b
CSRI.f0584	0.252512	-1.25798	0.21084	37	85	0.0656026	csri50a
HDCC.f0066	0.251485	-4.80773	1.68012e-06	633	866	0.0653357	ccvab,violent
Behaviour.f0890	0.248374	4.2888	1.94062e-05	527	675	0.0645276	behaviour_depscore
SF.f0820	0.245806	3.2099	0.00138752	394	319	0.0638603	activitiesv,pf01
HDCC.f0075	0.245147	-4.72315	2.53964e-06	633	867	0.0636891	cccog,dementia
CareQoL.f0448	0.243847	-2.10988	0.0355503	107	259	0.0633515
HADS.f0386	0.2429	-4.12258	4.01448e-05	537	620	0.0631055	outscore,outwardirrscore
SF.f0803	0.242278	1.93524	0.053512	433	80	0.0629439	sf22
PBAHD.f0748	0.242093	1.26144	0.209869	57	53	0.0628959	pbal22fr
SF.f0372	0.240891	2.6591	0.00805139	173	409	0.0625833
SF.f0855	0.239704	3.07078	0.00222243	368	296	0.062275	rp,rp_nbs
PBAHD.f0758	0.23921	-1.29726	0.197307	57	53	0.0621469	pbal27fr
MMSE.f0311	0.238606	2.59103	0.00982664	165	379	0.0619898
SF.f0373	0.238331	2.64674	0.00834727	173	411	0.0619185
CSRI.f0537	0.237692	4.13998	3.72583e-05	452	705	0.0617524	csri27
CSSRS.f0263	0.236432	-1.07009	0.287836	47	34	0.061425	sid5
PBAs.f0342	0.236335	-4.51413	6.78643e-06	536	1197	0.0613998	basapathfre,pbas6fr
PBAHD.f0715	0.235886	1.23126	0.2209	57	53	0.0612831	pbal6sv
CSRI.f0562	0.235363	1.57946	0.115736	64	148	0.0611473	csri39a
CSRI.f0549	0.235245	-4.54232	6.00903e-06	736	767	0.0611167	csri33
Cognitive.f0230	0.234082	4.89096	1.09482e-06	819	944	0.0608145	sdmt2
PBAs.f0341	0.233813	-4.43769	9.66615e-06	537	1197	0.0607445	basapath,pbas6sv
PBAHD.f0762	0.232803	-1.26724	0.207821	57	52	0.0604822	pbal29fr
CSRI.f0486	0.23217	-2.55562	0.0108959	201	299	0.0603178	csri9a
HDCC.f0068	0.231172	-4.44278	9.53268e-06	634	866	0.0600586	apathy,ccapt
Cognitive.f0223	0.23103	-1.05372	0.295106	40	44	0.0600217	gen2
CareQoL.f0423	0.231001	-2.01439	0.0447053	107	258	0.0600141
Behaviour.f0916	0.227298	-5.37768	8.34439e-08	1252	949	0.059052	confus
SF.f0819	0.227125	-3.02393	0.00258511	392	320	0.0590071	compared,ht
CareQoL.f0413	0.22667	1.96045	0.0507019	107	261	0.0588888
SF.f0371	0.226526	-2.48477	0.0132431	172	413	0.0588515
SF.f0830	0.225435	2.90118	0.00383851	376	302	0.058568	physiccut,rp01
HDCC.f0064	0.225041	-4.32531	1.62369e-05	635	868	0.0584657	ccirb,irritability
CSRI.f0552	0.224605	-2.72512	0.00659607	251	419	0.0583523	csri34a
CSRI.f0563	0.223324	-4.39851	1.16587e-05	749	771	0.0580196	csri40
SF.f0832	0.221322	2.87384	0.0041815	379	304	0.0574995	physiclimit,rp03
SF.f0838	0.220066	-2.95047	0.00327819	390	316	0.0571732	bodypain,bp01
CareQoL.f0442	0.219056	-1.90931	0.0570085	107	259	0.0569107
Care.f0874	0.219008	-3.83524	0.000131614	768	500	0.0568982	crgvr11
PBAs.f0343	0.218879	-4.17683	3.10364e-05	535	1193	0.0568648	baspersev,pbas7sv
Cognitive.f0252	0.217631	-2.93729	0.00341187	406	350	0.0565406	trailb_time,trlb1
SF.f0376	0.217449	2.35258	0.0189802	171	405	0.0564931
CSRI.f0561	0.216929	-4.25775	2.19151e-05	751	770	0.0563582	csri39
PBAHD.f0721	0.215274	1.1287	0.261526	57	53	0.0559281	pbal9sv
MHx.f0104	0.215068	-1.44198	0.15092	74	122	0.0558745	cigperday,hxtobcpd,numbercigarettes
MMSE.f0313	0.214452	2.12032	0.0344331	165	379	0.0557147
CSRI.f0512	0.214401	-3.46096	0.000557938	451	704	0.0557014	csri18
HADS.f0384	0.212644	-3.58491	0.000351476	536	604	0.055245	depscore,hads_depscore
Care.f0869	0.212342	-3.72878	0.000200903	769	500	0.0551664	crgvr6
Care.f0871	0.211859	-3.69168	0.000232248	771	498	0.0550409	crgvr8
PBAs.f0340	0.210774	-3.94985	8.12779e-05	538	1229	0.054759	basbehfre,pbas5fr
CSRI.f0483	0.210334	-2.81615	0.00497763	319	498	0.0546448	csri8a
Motor.f0212	0.209962	-7.33896	2.51258e-13	2142	2688	0.0545482	diagconf
CSRI.f0539	0.209444	4.04689	5.44828e-05	751	788	0.0544136	csri28
CSSRS.f0264	0.209005	1.32657	0.186553	79	82	0.0542994	int1
Medical.f0137	0.207811	5.90589	3.8502e-09	1201	2225	0.0539893	tobab
SF.f0784	0.205743	1.8042	0.0717792	436	86	0.0534521	sf3
CSSRS.f0260	0.20567	2.96399	0.00312335	351	484	0.053433	sid2
SF.f0377	0.204823	2.21662	0.0270411	172	403	0.053213
CSRI.f0519	0.204659	-1.51338	0.131442	86	167	0.0531705	csri20a
CareQoL.f0394	0.203083	1.72629	0.0851432	106	260	0.0527611
PBAHD.f0765	0.202464	-1.06914	0.287414	57	52	0.0526001	pbal31sv
CareQoL.f0416	0.202177	-1.74868	0.0811933	107	257	0.0525256
CareQoL.f0415	0.201311	1.77466	0.0767872	107	260	0.0523005
MMSE.f0299	0.200685	2.06296	0.0395917	165	380	0.0521381
SF.f0382	0.200419	2.17245	0.0302263	173	409	0.0520689
PBAHD.f0761	0.200121	-1.07573	0.284466	57	52	0.0519913	pbal29sv
CSSRS.f0268	0.199777	1.20176	0.231459	75	69	0.0519021	int5
Care.f0881	0.199703	-3.40548	0.000682477	725	468	0.0518827	crgvr18
WPAI.f0595	0.199379	2.10124	0.0363325	111	242	0.0517986
Cognitive.f0662	0.197888	-1.67814	0.0944048	196	94	0.0514114	hvlt3
PBAs.f0330	0.197068	-3.72697	0.00020009	534	1181	0.0511982	exfscore
Behaviour.f0895	0.197064	4.60165	4.42417e-06	1294	962	0.0511972	deprsv
PBAHD.f0763	0.195842	0.954743	0.34186	57	52	0.0508797	pbal30sv
PBAHD.f0764	0.195842	0.954743	0.34186	57	52	0.0508797	pbal30fr
CareQoL.f0450	0.195344	1.70985	0.0881507	107	257	0.0507503
SF.f0833	0.195195	2.52644	0.0117491	382	298	0.0507117	physicdiff,rp04
PBAs.f0339	0.195022	-3.68724	0.000233559	538	1229	0.0506667	basbeh,pbas5sv
SF.f0367	0.194686	3.40502	0.000682686	547	698	0.0505793	re,re_nbs,resubscore
SF.f0809	0.194317	1.61923	0.106002	438	86	0.0504836	sf28
PBAHD.f0741	0.194259	1.01732	0.311296	57	52	0.0504685	pbal19sv
Behaviour.f0920	0.193836	-4.53331	6.11872e-06	1252	947	0.0503586	irritrfr
SF.f0818	0.193383	-2.55746	0.0107509	393	318	0.0502408	general,general_sf36,gh01
PBAHD.f0733	0.192831	-1.01835	0.31079	57	53	0.0500975	pbal15sv
Behaviour.f0894	0.192821	4.5028	7.04805e-06	1295	962	0.050095	deprfr
CSRI.f0507	0.192501	-1.26784	0.206449	78	109	0.0500117	csri16a
HDCC.f0072	0.192161	-3.66079	0.000260159	634	868	0.0499234	ccpsy,psychosis
CareQoL.f0430	0.19204	-1.67451	0.0948891	107	259	0.0498919
PBAHD.f0766	0.191007	-1.00332	0.317968	57	52	0.0496236	pbal31fr
CSSRS.f0277	0.19068	2.79234	0.00535267	352	483	0.0495386	sbh5
PBAs.f0327	0.189985	-3.55518	0.000387711	534	1227	0.0493582	irascore
PBAs.f0611	0.189185	-2.64748	0.00822662	265	826	0.0491501	basapathworst,pbas6wo
CSRI.f0518	0.186054	-3.06182	0.00225099	452	701	0.0483369	csri20
CareQoL.f0427	0.185909	1.64258	0.101333	107	259	0.0482991
Cognitive.f0247	0.184664	3.96752	7.53923e-05	869	985	0.0479756	sit3
MMSE.f0300	0.184124	1.93166	0.0539214	165	380	0.0478355
SF.f0859	0.183587	2.39141	0.0170527	381	306	0.0476959	sf,sf_nbs
CareQoL.f0424	0.182604	-1.57914	0.115174	107	258	0.0474405
Medical.f0139	0.182316	2.53581	0.0113534	259	866	0.0473658	cafab
PBAHD.f0742	0.181986	0.954844	0.341809	57	52	0.0472799	pbal19fr
CareQoL.f0396	0.18057	-1.58666	0.113467	104	258	0.0469121
CareQoL.f0406	0.178194	1.52239	0.128777	107	260	0.0462947
Care.f0872	0.178045	-3.12414	0.00182363	771	500	0.0462562	crgvr9
PBAs.f0607	0.175966	2.62316	0.00883343	267	825	0.0457159	bassuicworst,pbas2wo
Enrollment.f0093	0.175102	3.51287	0.000456345	923	591	0.0454916	rfstdy
Behaviour.f0899	0.174471	4.05807	5.11667e-05	1294	961	0.0453276	anxisv
SF.f0837	0.173067	-2.27337	0.0233071	387	312	0.0449627	extent,sf01
CSSRS.f0265	0.171318	-1.03587	0.301988	75	72	0.0445085	int2
SF.f0850	0.170315	2.25427	0.024489	387	312	0.0442477	gh02,sick
Behaviour.f0915	0.17004	-4.03708	5.5929e-05	1293	962	0.0441764	apathsv
CSRI.f0774	0.168502	2.35551	0.0187586	311	427	0.0437767	csri59
PBAHD.f0739	0.168056	0.884403	0.378443	57	53	0.0436609	pbal18sv
CSRI.f0465	0.167931	1.26406	0.207671	78	125	0.0436284	csri3a
PBAHD.f0734	0.164962	-0.870523	0.385945	57	53	0.0428572	pbal15fr
CareQoL.f0431	0.164577	-1.43067	0.153386	106	259	0.0427572
CSRI.f0490	0.163991	1.17436	0.241576	101	112	0.042605	csri10b
CSRI.f0489	0.163759	-1.19638	0.232902	100	111	0.0425447	csri10a
PBAHD.f0725	0.159922	0.821888	0.412951	57	53	0.0415478	pbal11sv
Behaviour.f0903	0.159921	-3.83639	0.000128285	1287	970	0.0415474	aggrsv
Care.f0873	0.159744	-2.77108	0.00566904	768	497	0.0415016	crgvr10
Cognitive.f0663	0.159276	1.36232	0.174178	193	93	0.0413799	hvlt4
SF.f0849	0.158774	2.09514	0.0365177	389	312	0.0412495	interferesocial,sf02
CareQoL.f0449	0.158207	1.38645	0.166466	106	257	0.0411022
Care.f0875	0.157945	-2.77202	0.00565238	770	500	0.0410342	crgvr12
CSSRS.f0259	0.157927	2.26499	0.0237694	351	485	0.0410294	sid1
PBAs.f0606	0.157628	2.2748	0.0231097	267	835	0.0409517	basdeprworst,pbas1wo
PBAHD.f0722	0.156904	0.824004	0.411753	57	53	0.0407637	pbal9fr
PBAs.f0349	0.155798	-2.80425	0.00509978	537	1194	0.0404762	bashall,pbas10sv
PBAHD.f0716	0.155632	0.818695	0.414763	57	53	0.0404331	pbal6fr
Cognitive.f0661	0.15524	-1.31606	0.1892	196	94	0.0403313	hvlt2
Behaviour.f0891	0.154905	-2.66115	0.00789141	527	675	0.0402443	defscore
SF.f0848	0.153763	2.01983	0.0437828	385	315	0.0399477	tired,vt04
SF.f0363	0.152223	2.67755	0.00751285	554	704	0.0395476	bp,bp_nbs,bpsubscore
PBAs.f0355	0.151845	-2.75504	0.00593002	537	1194	0.0394492	bashallfre,pbas10fr
PBAs.f0610	0.151814	-2.11645	0.0345279	267	850	0.0394412	basbehworst,pbas5wo
CSRI.f0488	0.151412	2.533	0.0114407	453	703	0.0393369	csri10
CareQoL.f0422	0.150116	-1.27192	0.204216	107	257	0.0390001
CSRI.f0579	0.148761	-2.43336	0.0151117	451	695	0.0386481	csri48
CSRI.f0551	0.148277	-2.86529	0.00422452	737	762	0.0385223	csri34
Mortality.f0089	0.14814	-0.884549	0.377806	93	60	0.0384867	dssage
PBAs.f0612	0.147306	-2.07264	0.0384414	265	824	0.03827	pbas7wo
MHx.f0102	0.146166	2.45805	0.0141167	560	587	0.0379739	alcoholabuse,hxalcab
SF.f0817	0.145995	1.23558	0.217172	437	85	0.0379294	sf36
MHx.f0106	0.145911	-1.59086	0.11233	238	223	0.0379078	hxpacky
CareQoL.f0457	0.145645	-0.862543	0.389696	50	110	0.0378386
SF.f0857	0.145321	1.90317	0.0574419	374	306	0.0377544	gh,gh_nbs
CSRI.f0484	0.14466	2.03931	0.0417402	316	504	0.0375826	csri8b
CSRI.f0471	0.14431	-0.648794	0.518263	36	49	0.0374917	csri5a
SF.f0856	0.143144	1.87225	0.0616028	379	300	0.0371887	bp,bp_nbs
CSRI.f0583	0.141753	-2.31631	0.0207178	451	693	0.0368275	csri50
CareQoL.f0456	0.140331	1.20296	0.229796	103	253	0.0364581
CSRI.f0466	0.139816	-0.941166	0.347761	76	125	0.0363241	csri3b
Enrollment.f0097	0.13896	-1.48387	0.138535	149	308	0.0361018
Motor.f0203	0.137744	-4.84264	1.32004e-06	2270	2717	0.0357858	chorbol,choreabol
MMSE.f0312	0.136382	1.47527	0.14072	165	379	0.035432
Behaviour.f0902	0.135094	-3.22328	0.00128539	1287	972	0.0350975	aggrfr
Behaviour.f0898	0.134833	3.14831	0.00166366	1294	961	0.0350295	anxifr
SF.f0782	0.134682	1.14095	0.254411	441	85	0.0349905	sf1
CSRI.f0462	0.134016	-0.969826	0.333175	96	131	0.0348174	csri2a
Behaviour.f0901	0.13352	3.03761	0.0024121	1291	956	0.0346885	suicsv
SF.f0783	0.132871	1.15189	0.249889	442	86	0.0345198	sf2
CareQoL.f0410	0.132108	1.16558	0.244547	107	260	0.0343218
CSRI.f0545	0.131523	-2.578	0.0100299	751	785	0.0341697	csri31
CareQoL.f0417	0.130574	-1.12369	0.261888	107	257	0.0339231
CSRI.f0500	0.130526	-2.1401	0.0325557	452	704	0.0339107	csri14
SF.f0374	0.129329	1.39933	0.162252	172	408	0.0335997
SF.f0805	0.127442	1.08754	0.2773	438	85	0.0331094	sf24
Behaviour.f0892	0.127214	-2.19013	0.0287048	527	688	0.0330502	behaviour_irascore
Cognitive.f0251	0.126844	-1.87509	0.0611161	458	412	0.032954	triala_error,trla3
Motor.f0202	0.126321	-4.44081	9.15575e-06	2270	2716	0.0328182	choreaface,chorface
Care.f0878	0.126051	-2.20474	0.0276531	765	495	0.0327479	crgvr15
CareQoL.f0452	0.124413	1.08515	0.278578	107	258	0.0323224
Behaviour.f0914	0.12348	-2.90822	0.00367054	1293	961	0.0320801	apathfr
CareQoL.f0441	0.123414	-1.07093	0.284916	106	258	0.032063
PBAs.f0338	0.123405	-2.356	0.0185816	538	1230	0.0320606	basirritfre,pbas4fr
PBAs.f0328	0.121385	-2.25157	0.0244753	533	1184	0.0315357	psyscore
PBAHD.f0751	0.120172	0.628239	0.531174	57	53	0.0312208	pbal24sv
CareQoL.f0397	0.118033	1.00161	0.317198	106	259	0.030665
Behaviour.f0893	0.116486	-2.00123	0.0455917	528	680	0.030263	behaviour_psyscore
Behaviour.f0921	0.11576	-2.68617	0.00728059	1288	972	0.0300743	isobt
Behaviour.f0907	0.114287	-2.69051	0.00718723	1293	953	0.0296917	obsesssv
CSRI.f0543	0.113957	2.20964	0.0272772	750	791	0.029606	csri30
CareQoL.f0414	0.112904	1.008	0.314123	107	261	0.0293324
Behaviour.f0900	0.112442	2.57834	0.00999083	1292	956	0.0292123	suicfr
PBAs.f0615	0.111716	-1.5172	0.129507	267	827	0.0290238	bashallworst,pbas10wo
CSRI.f0460	0.110826	1.51094	0.13125	294	415	0.0287926	csri1b
CSSRS.f0267	0.110465	-0.665465	0.506841	74	69	0.0286989	int4
Physio.f0323	0.110322	-0.7945	0.427805	89	122	0.0286616	tug1
HDCC.f0059	0.110271	-1.27438	0.203077	241	300	0.0286484	dadagesx
HDCC.f0062	0.109732	-2.10587	0.0353819	635	867	0.0285083	ccdep,depression
CSRI.f0487	0.109025	1.25396	0.210439	200	304	0.0283247	csri9b
SF.f0375	0.107741	1.17303	0.241268	173	407	0.0279912
Care.f0877	0.107706	-1.88393	0.0598025	772	500	0.0279821	crgvr14
Enrollment.f0100	0.107585	-1.08592	0.278093	148	307	0.0279505
Care.f0876	0.105387	-1.8488	0.0647203	770	498	0.0273796	crgvr13
CareQoL.f0393	0.104875	0.911844	0.362454	106	260	0.0272465
CSRI.f0773	0.104626	1.39572	0.163224	308	424	0.0271819	csri58
CSRI.f0480	0.104625	-0.515584	0.607294	43	58	0.0271817	csri7a
Mortality.f0090	0.104172	-0.633107	0.527641	90	60	0.0270639	dsplace
SF.f0381	0.103394	1.12992	0.258983	172	404	0.0268617
CSSRS.f0266	0.103063	-0.621695	0.535132	75	70	0.0267757	int3
HADS.f0385	0.102839	-1.73575	0.0828777	535	610	0.0267175	irrscore
SF.f0812	0.102507	-0.874462	0.382272	434	86	0.0266313	sf31
CSRI.f0509	0.10225	-1.68452	0.0923514	452	703	0.0265646	csri17
SF.f0816	0.101751	0.87726	0.380752	436	84	0.0264349	sf35
Cognitive.f0254	0.101324	1.29503	0.195707	407	348	0.0263239	trialb_error,trlb3
Behaviour.f0906	0.100239	-2.35615	0.0185508	1293	955	0.0260421	obsessfr
PBAHD.f0749	0.0999318	-0.526222	0.599813	57	53	0.0259623	pbal23sv
CSRI.f0494	0.0995268	1.69344	0.0906423	452	704	0.0258571	csri12
CareQoL.f0395	0.0994243	-0.815351	0.415407	106	258	0.0258304
PBAHD.f0746	0.0992764	-0.523528	0.601679	57	53	0.025792	pbal21fr
SF.f0811	0.0991272	0.854666	0.393129	437	86	0.0257532	sf30
Mortality.f0091	0.0979832	-0.547245	0.585171	79	50	0.025456	dsend
PBAHD.f0750	0.0976053	-0.515206	0.607462	57	53	0.0253579	pbal23fr
Medical.f0135	0.0975046	2.74546	0.00607426	1195	2226	0.0253317	alcab
Care.f0879	0.09678	-1.68705	0.0918422	765	490	0.0251434	crgvr16
SF.f0806	0.096256	0.836843	0.403065	437	85	0.0250073	sf25
Enrollment.f0101	0.0959068	-1.60665	0.108408	557	588	0.0249166
SF.f0366	0.095863	1.69544	0.0902364	557	715	0.0249052	sf,sf_nbs,sfsubscore
HDCC.f0061	0.0945252	1.80754	0.07088	628	861	0.0245576	ccmtrage,motorage
CSRI.f0517	0.0944887	-0.883324	0.377607	154	237	0.0245482	csri19b
PBAs.f0608	0.0930624	1.32865	0.18424	267	834	0.0241776	basanxworst,pbas3wo
HDCC.f0085	0.0926745	-1.81707	0.0694001	710	838	0.0240768	majorsymptomfamily,sxfamm
PBAHD.f0745	0.0918084	-0.48437	0.629104	57	53	0.0238518	pbal21sv
CSRI.f0492	0.0914127	-0.399841	0.690265	34	54	0.023749	csri11a
CareQoL.f0389	0.0913087	0.697151	0.486152	107	260	0.023722
CareQoL.f0443	0.0912019	-0.786591	0.432035	107	258	0.0236943
HDCC.f0076	0.0910597	1.55166	0.121007	472	733	0.0236573	cccogage,dementage
CareQoL.f0405	0.0903167	0.770428	0.44155	105	258	0.0234643
Enrollment.f0648	0.0898099	-1.1127	0.266246	395	260	0.0233326
SF.f0807	0.0866698	-0.721745	0.470776	437	85	0.0225168	sf26
CSRI.f0485	0.0866389	-1.7036	0.0886568	755	791	0.0225088	csri9
SF.f0810	0.0855756	-0.702269	0.482825	438	86	0.0222325	sf29
HDCC.f0074	0.0853598	0.659435	0.510196	88	176	0.0221765	ccpsyfh
CSSRS.f0270	0.0851954	1.22544	0.220753	352	486	0.0221338	sbh1
CareQoL.f0439	0.0851592	-0.738002	0.46099	106	259	0.0221244
PBAHD.f0719	0.0847885	0.444732	0.657403	57	53	0.0220281	pbal8sv
CSRI.f0573	0.082804	-1.34408	0.179192	448	686	0.0215125	csri45
PBAs.f0337	0.0826634	-1.58938	0.112155	538	1230	0.021476	basirrit,pbas4sv
Care.f0882	0.082653	-1.44477	0.148773	764	491	0.0214732	crgvr19
CSRI.f0511	0.0825416	0.48144	0.630854	53	111	0.0214443	csri17b
HADS.f0387	0.082001	1.38648	0.165868	535	615	0.0213039	inwardirrscore,inwscore
CSRI.f0555	0.0805917	-1.58278	0.113679	749	772	0.0209377	csri36
CSSRS.f0278	0.0801856	1.1613	0.245851	352	488	0.0208322	sbh6
CSSRS.f0275	0.0788082	1.17287	0.241184	352	484	0.0204744	sbh4
Cognitive.f0238	0.077611	-1.79438	0.0728874	919	1324	0.0201633	scnt2
Cognitive.f0222	0.077496	-1.94421	0.0519782	974	1622	0.0201335	gen1
SF.f0362	0.0772677	1.35192	0.176647	543	702	0.0200741	rp,rp_nbs,rpsubscore
Summary.f0777	0.0769838	-2.10722	0.0351813	1571	1445	0.0200004	visitprp
SF.f0842	0.0763257	1.00966	0.313011	384	311	0.0198294	dumps,mh02
CareQoL.f0392	0.0762593	0.590542	0.555199	105	256	0.0198122
HDCC.f0084	0.0761939	-1.48702	0.137214	697	841	0.0197952	majorsymptomsubject,sxsubjm
CSRI.f0481	0.0752806	-0.3799	0.704794	43	63	0.0195579	csri7b
SF.f0368	0.0744796	-1.30813	0.191069	547	706	0.0193498	mh,mh_nbs,mhsubscore
Care.f0886	0.0725244	-1.28633	0.198566	767	492	0.0188418	crgvr23
CSRI.f0533	0.0723084	-1.13094	0.258313	451	706	0.0187857	csri25
HDCC.f0080	0.0709521	1.402	0.161114	715	859	0.0184334	hddiagn,hddiagnosed
PBAs.f0333	0.0699523	1.36407	0.172722	537	1195	0.0181736	bassuic,pbas2sv
CSRI.f0546	0.0697213	0.778571	0.436587	195	326	0.0181136	csri31a
PBAs.f0347	0.0692372	-1.30756	0.191198	537	1189	0.0179878	basdel,pbas9sv
MHx.f0107	0.0687986	1.15434	0.248604	559	587	0.0178739	druguse,hxdrugab
CareQoL.f0444	0.0686415	0.593524	0.553199	107	259	0.0178331
Motor.f0204	0.0683682	-2.40326	0.0162858	2269	2717	0.0177621	choreatrunk,chortrnk
CSRI.f0559	0.0678714	-1.10993	0.267263	449	687	0.017633	csri38
CSRI.f0482	0.067863	-1.32975	0.183799	753	787	0.0176308	csri8
SF.f0858	0.0677802	0.877938	0.380289	373	305	0.0176093	vt,vt_nbs
SF.f0846	0.0674958	0.883792	0.377115	382	313	0.0175354	vt03,wornout
PBAs.f0331	0.0668679	1.29464	0.195615	537	1205	0.0173723	basdepr,pbas1sv
CSRI.f0464	0.0661188	-1.29988	0.193836	751	790	0.0171777	csri3
chorea.score	0.0656615	-2.30756	0.0210644	2269	2715	0.0170589
HDCC.f0079	0.0648234	1.26148	0.20733	697	829	0.0168411	sxfam,symptomsfamily
PBAHD.f0740	0.0638913	0.337514	0.736384	57	53	0.016599	pbal18fr
Behaviour.f0913	0.0635393	-1.51702	0.129402	1295	960	0.0165075	hallucsv
MHx.f0103	0.0631872	1.06885	0.285364	559	587	0.016416	hxtobab,smoking,smoking_hx
Enrollment.f0647	0.0619181	0.818623	0.413285	409	280	0.0160863
HDCC.f0078	0.0618967	1.19477	0.232365	675	828	0.0160808	sxsubj,symptomssubject
Medical.f0138	0.0612632	0.723337	0.469775	258	303	0.0159162	packy
Behaviour.f0905	0.0611199	-1.44332	0.149069	1294	969	0.015879	irritsv
Behaviour.f0912	0.061067	-1.44976	0.147265	1295	961	0.0158652	hallucfr
HDCC.f0063	0.0606739	1.0049	0.315158	458	674	0.0157631	ccdepage,depressage
PBAHD.f0735	0.0606458	0.319564	0.749916	57	53	0.0157558	pbal16sv
PBAs.f0348	0.059963	-1.1372	0.255612	537	1189	0.0155784	basdelfre,pbas9fr
CSRI.f0589	0.059027	-1.15623	0.24777	750	772	0.0153352	csri53
Medical.f0140	0.0587114	0.693739	0.488066	186	548	0.0152532	cafpd
HDCC.f0082	0.0577734	1.12045	0.262701	676	843	0.0150095	sxrater
HDCC.f0067	0.0576612	-0.748977	0.454116	259	462	0.0149804	ccvabage,violentage
PBAs.f0336	0.0576521	-1.10417	0.269671	538	1208	0.014978	basanxfre,pbas3fr
SF.f0845	0.0575336	0.757457	0.449033	382	314	0.0149472	downheart,mh04
Enrollment.f0096	0.0575288	0.980235	0.327177	559	589	0.014946
PBAHD.f0752	0.0574697	0.301794	0.76339	57	53	0.0149306	pbal24fr
CSRI.f0503	0.0568574	0.957777	0.338376	452	705	0.0147715	csri15
CSRI.f0536	0.0565469	1.10339	0.270031	746	785	0.0146909	csri26
Cognitive.f0234	0.0564869	1.34764	0.177909	906	1364	0.0146753	verfct6
CSRI.f0557	0.0563222	-0.927499	0.353864	451	689	0.0146325	csri37
CSSRS.f0262	0.0546895	-0.24373	0.808072	47	34	0.0142083	sid4
CSRI.f0565	0.0546439	-1.07175	0.284002	749	772	0.0141965	csri41
SF.f0861	0.054518	0.706454	0.48015	372	304	0.0141638	mh,mh_nbs
CareQoL.f0447	0.0532852	-0.462643	0.643897	107	259	0.0138435
Care.f0870	0.0530452	-0.92821	0.353476	771	495	0.0137811	crgvr7
PBAHD.f0726	0.0529627	0.278843	0.780898	57	53	0.0137597	pbal11fr
CSRI.f0461	0.0527133	1.03208	0.302196	751	787	0.0136949	csri2
SF.f0853	0.0525075	-0.688922	0.491102	385	311	0.0136415	excellent,gh05
SF.f0847	0.0518742	-0.679013	0.497356	383	311	0.0134769	happy,mh05
CareQoL.f0445	0.0515551	-0.444993	0.65659	107	258	0.013394
CSRI.f0524	0.0510935	-0.799131	0.424379	451	706	0.0132741	csri22
CSRI.f0530	0.0510935	-0.799131	0.424379	451	706	0.0132741	csri24
SF.f0365	0.050984	-0.895981	0.370435	548	709	0.0132456	vt,vt_nbs,vtsubscore
HDCC.f0069	0.0507338	0.824109	0.410056	425	677	0.0131806	apathyage,ccaptage
CSRI.f0776	0.0505547	0.483186	0.629249	175	197	0.0131341	csri60__2
HDCC.f0081	0.050106	0.997857	0.318501	724	867	0.0130175	raterestimate,sxest
HDCC.f0077	0.0487978	-0.688082	0.491543	261	866	0.0126777	hxsid
CareQoL.f0446	0.0487906	-0.424643	0.671348	107	259	0.0126758
PBAHD.f0712	0.0479099	0.251311	0.802051	57	53	0.012447	pbal4fr
PBAHD.f0727	0.0470075	-0.248233	0.804426	57	53	0.0122126	pbal12sv
SF.f0815	0.0468915	0.410733	0.681438	436	85	0.0121824	sf34
Cognitive.f0239	0.0464912	1.08163	0.279531	919	1325	0.0120784	scnt3
CSRI.f0476	0.0460948	-0.386208	0.699583	101	242	0.0119754
Cognitive.f0235	0.0456644	1.06545	0.286788	906	1363	0.0118636	verfct7
SF.f0808	0.0454211	-0.400702	0.688804	438	86	0.0118004	sf27
Cognitive.f0246	0.0447524	-0.961946	0.336202	869	985	0.0116267	sit2
CSRI.f0558	0.0447332	-0.328329	0.742963	86	145	0.0116217	csri37a
PBAHD.f0728	0.0443751	-0.233237	0.816019	57	53	0.0115287	pbal12fr
Care.f0885	0.0428252	-0.753651	0.4512	765	492	0.011126	crgvr22
PBAs.f0358	0.0427856	-0.834075	0.404351	543	1239	0.0111157	basrelative,pbainfo
Behaviour.f0904	0.041858	-0.986226	0.324128	1295	970	0.0108747	irritfr
PBAHD.f0718	0.0414498	0.218392	0.827536	57	53	0.0107687	pbal7fr
CSRI.f0473	0.0411018	0.803136	0.42202	753	792	0.0106782	csri6
Care.f0884	0.0409437	-0.718544	0.472556	767	491	0.0106372	crgvr21
CareQoL.f0437	0.0408976	0.359335	0.719553	106	259	0.0106252
base.model.na.prop	0.040304	-1.4287	0.153151	2316	2747	0.010471
PBAs.f0614	0.0400539	-0.559796	0.575734	267	825	0.010406	basdelworst,pbas9wo
HDCC.f0073	0.0392331	0.325848	0.744759	104	208	0.0101928	ccpsyage,psychage
SF.f0813	0.0391922	0.343507	0.731356	437	86	0.0101821	sf32
CSRI.f0458	0.0391334	0.769048	0.441982	754	791	0.0101669	csri1
PBAHD.f0711	0.0390919	0.205677	0.837431	57	53	0.0101561	pbal4sv
Cognitive.f0257	0.0381524	-0.849415	0.395752	894	1114	0.009912	verflt06
PBAs.f0613	0.0374302	0.530102	0.596148	267	836	0.00972438	basobscompworst,pbas8wo
HDCC.f0060	0.0370225	0.700054	0.484002	635	867	0.00961844	ccmtr,motor
Motor.f0208	0.0360429	-1.26705	0.205196	2270	2716	0.00936395	chorealle,chorlle
CareQoL.f0440	0.0359786	-0.31141	0.755669	105	257	0.00934725
Behaviour.f0919	0.0358478	-0.833068	0.404897	1251	948	0.00931326	deprrfr
Behaviour.f0889	0.0357106	0.837724	0.402274	1296	974	0.00927761	biscore
SF.f0852	0.0355726	0.465007	0.642073	385	309	0.00924176	gh04,worse
PBAHD.f0729	0.0354025	0.186367	0.852507	57	53	0.00919756	pbal13sv
Behaviour.f0911	0.0348742	-0.833421	0.404696	1292	957	0.00906032	delussv
Enrollment.f0099	0.034568	-0.354021	0.723487	149	308	0.00898077
CSRI.f0470	0.0341764	0.670317	0.502756	753	792	0.00887903	csri5
CSRI.f0463	0.0341514	-0.253286	0.800277	96	132	0.00887253	csri2b
HDCC.f0058	0.0339552	-0.650474	0.515487	671	810	0.00882156	dadhd
PBAHD.f0717	0.0330993	0.174179	0.862051	57	53	0.00859919	pbal7sv
CSRI.f0497	0.0326409	0.549937	0.582469	452	705	0.00848011	csri13
PBAHD.f0738	0.0322389	0.169707	0.865558	57	53	0.00837566	pbal17fr
Motor.f0207	0.0309588	-1.08833	0.276501	2270	2716	0.0080431	chorearle,chorrle
PBAs.f0334	0.030641	0.58743	0.556992	537	1194	0.00796053	bassuicfre,pbas2fr
Enrollment.f0095	0.0295054	-0.49808	0.618523	558	588	0.0076655	fhx
SF.f0378	0.029242	-0.317508	0.750974	172	404	0.00759708
CSRI.f0491	0.0290547	0.483809	0.628613	453	704	0.00754842	csri11
CSRI.f0508	0.0283977	-0.190115	0.849427	78	109	0.00737773	csri16b
CareQoL.f0404	0.0283162	0.246479	0.80545	107	260	0.00735654
HDCC.f0071	0.0277691	0.415605	0.677792	343	617	0.00721442	ccpobage,obsessage
CSSRS.f0273	0.0270373	-0.384489	0.700714	352	485	0.00702428	sbh3
Behaviour.f0918	0.0266703	0.618375	0.536392	1251	948	0.00692894	deprexam
Medical.f0141	0.0260421	-0.7016	0.482976	1201	2235	0.00676575	drugab
CSRI.f0515	0.0251559	-0.494239	0.621207	754	790	0.0065355	csri19
PBAHD.f0755	0.0248816	-0.131357	0.895737	57	53	0.00646425	pbal26sv
SF.f0379	0.0245076	-0.27067	0.786742	173	405	0.00636708
CareQoL.f0454	0.0243191	-0.206161	0.836785	102	251	0.0063181
PBAHD.f0714	0.0239653	0.125599	0.900283	57	53	0.00622619	pbal5fr
HDCC.f0056	0.0239355	-0.463725	0.642911	688	826	0.00621845	momhd
CSRI.f0541	0.0238466	0.467038	0.640539	750	790	0.00619535	csri29
PBAHD.f0730	0.0236714	0.124415	0.901218	57	53	0.00614983	pbal13fr
Enrollment.f0646	0.023031	-0.295465	0.767728	410	281	0.00598346
Cognitive.f0258	0.0218301	0.484199	0.628298	894	1114	0.00567147	verflt07
Care.f0887	0.0214705	0.370119	0.711357	765	492	0.00557803	crgvr24
Enrollment.f0098	0.0214398	-0.361791	0.717575	558	588	0.00557007
Behaviour.f0910	0.0201801	-0.479372	0.631721	1292	957	0.00524278	delusfr
CareQoL.f0403	0.01889	-0.163589	0.870145	106	260	0.00490762
CareQoL.f0432	0.0188289	0.165311	0.868791	107	259	0.00489175
Behaviour.f0908	0.0186364	-0.438159	0.661313	1287	954	0.00484174	compulfr
HDCC.f0086	0.0180377	-0.35835	0.720129	728	862	0.00468619	majorsymptomrater,sxraterm
Cognitive.f0242	0.0179533	-0.425446	0.670553	906	1302	0.00466428	swrt2
PBAHD.f0756	0.0178706	0.0934874	0.92569	57	53	0.00464278	pbal26fr
SF.f0839	0.0177111	-0.23075	0.817578	382	300	0.00460135	bp02,interferework
PBAHD.f0737	0.0165211	-0.0874925	0.930442	57	53	0.00429217	pbal17sv
Behaviour.f0888	0.015762	0.360113	0.718798	1239	917	0.00409496	behscore
CSRI.f0479	0.015124	-0.297138	0.766401	752	791	0.00392922	csri7
SF.f0814	0.0144416	-0.124392	0.901053	437	84	0.00375193	sf33
SF.f0844	0.0141272	-0.186069	0.852445	387	312	0.00367026	energy,energy_sf36,vt02
CSRI.f0516	0.0140931	-0.139396	0.889208	159	237	0.00366139	csri19a
SF.f0370	0.0140813	0.236858	0.812809	504	647	0.00365833	mcs,mcsum
SF.f0364	0.014019	0.246906	0.805021	549	719	0.00364213	gh,gh_nbs,ghsubscore
PBAHD.f0713	0.0139404	0.0730747	0.941882	57	53	0.00362172	pbal5sv
HDCC.f0065	0.0137073	-0.21667	0.828507	402	647	0.00356116	ccirbage,irritage
PBAs.f0609	0.0133736	0.188886	0.850217	267	850	0.00347446	basirritworst,pbas4wo
SF.f0840	0.0126667	0.166739	0.867624	386	310	0.00329081	life,vt01
CSRI.f0506	0.0123202	0.241824	0.808949	754	789	0.00320078	csri16
CSRI.f0553	0.0121844	-0.236174	0.81333	735	767	0.0031655	csri35
HDCC.f0083	0.0116842	-0.195925	0.844703	460	725	0.00303557	sxestcfd
HDCC.f0057	0.0107016	-0.124467	0.900991	238	313	0.00278028	momagesx
SF.f0380	0.00986134	-0.107576	0.91437	172	404	0.00256198
HADS.f0383	0.00768962	0.129517	0.896972	537	601	0.00199776	anxscore
PBAs.f0346	0.00768914	0.147465	0.882782	536	1208	0.00199764	basobscompfre,pbas8fr
Cognitive.f0656	0.00682495	0.0546866	0.956427	193	93	0.00177312	hvltd
CSRI.f0459	0.00640646	-0.0825536	0.93423	296	417	0.0016644	csri1a
PBAHD.f0736	0.0061255	0.0323322	0.974267	57	53	0.0015914	pbal16fr
PBAHD.f0753	0.00578797	-0.0305983	0.975646	57	53	0.00150372	pbal25sv
Cognitive.f0243	0.00552808	0.127419	0.89862	906	1303	0.00143619	swrt3
Summary.f0780	0.00527973	0.145185	0.884575	1570	1444	0.00137167	dxentire
PBAHD.f0720	0.00502235	-0.0266051	0.978824	57	53	0.00130481	pbal8fr
SF.f0843	0.00501337	-0.0659802	0.947413	385	312	0.00130247	calm,mh03
CSSRS.f0261	0.00495076	-0.0220019	0.982502	47	34	0.00128621	sid3
Care.f0883	0.00479638	-0.0837847	0.933241	766	492	0.0012461	crgvr20
CSSRS.f0272	0.00455232	0.0650859	0.948121	352	486	0.00118269	sbh2
PBAs.f0335	0.00436938	0.0845033	0.932666	538	1207	0.00113516	basanx,pbas3sv
PBAs.f0326	0.00394591	0.0762082	0.939262	533	1184	0.00102515	depscore
PBAs.f0332	0.00293917	-0.0563319	0.955084	537	1207	0.000763596	basdeprfre,pbas1fr
SF.f0841	0.00286389	-0.0376579	0.969971	387	313	0.000744038	mh01,nervous
CareQoL.f0434	0.00284896	-0.0247403	0.980276	107	258	0.000740159
Care.f0880	0.00237155	0.0407866	0.967473	746	479	0.000616128	crgvr17
Motor.f0206	0.00227102	-0.079838	0.936369	2270	2717	0.000590012	chorealue,chorlue
Behaviour.f0909	0.0021222	0.049776	0.960305	1286	954	0.000551348	compulsv
CSRI.f0577	0.00205985	0.0402731	0.967881	751	779	0.000535149	csri47
Motor.f0205	0.00151285	0.0531844	0.957587	2270	2717	0.000393039	chorearue,chorrue
SF.f0851	0.0011292	-0.0148716	0.988139	384	311	0.000293366	gh03,healthy
PBAHD.f0754	0.000879068	0.0046358	0.99631	57	53	0.000228382	pbal25fr
PBAs.f0345	0	0	1	536	1208	0	basobscomp,pbas8sv

## Sheet: jump_states_3_5
var	d	t_val	p_val	#samples_st3	#samples_st5	d_normalized	var_name
Functional.f0213	1.96958	40.3607	2.28214e-250	950	752	0.770302	functionalscore,tfcscore
Functional.f0221	1.74384	30.1112	6.41758e-149	650	555	0.682017	indepencescale,indepscl
Functional.f0219	1.60564	27.0064	4.76947e-125	627	536	0.627967	fascore,functionscore
Functional.f0220	1.58833	26.9295	5.99732e-125	635	549	0.621198	fiscore
asfascore	1.56472	13.2272	1.64614e-31	221	68	0.611962
Functional.f0214	1.50773	30.889	1.13749e-166	950	752	0.589673	fcoccupation,occupatn
Motor.f0180	1.38157	-23.7112	3.03372e-102	648	554	0.540332	miscore
GCI.f0863	1.33739	-15.1529	1.83967e-44	436	197	0.523055	svrtyll
Functional.f0216	1.32976	26.2339	5.99575e-126	887	674	0.520068	chores,fcdomestic
Motor.f0179	1.26888	-26.2383	5.34399e-128	977	753	0.496259	motorscore,motscore
Functional.f0215	1.13832	23.585	7.71145e-107	977	751	0.445195	fcfinances,finances,finances_tfc
Functional.f1247	1.11236	12.4723	2.64417e-31	305	201	0.435045	emplany,employment,uhdrs44
Functional.f1246	1.09807	11.9978	2.39115e-29	305	201	0.429456	employmentaccu,emplusl,uhdrs43
Motor.f2447	1.07148	-11.8614	1.03641e-28	293	200	0.419055	brady_tot
Functional.f2453	1.06339	-11.5149	2.77266e-27	293	193	0.415894	uhdrs80
Motor.f0209	0.911692	-18.9748	3.62526e-73	989	765	0.356563	gait
CareQoL.f0446	0.885474	-3.77927	0.000299322	30	53	0.346309
CareQoL.f0448	0.849797	-3.47741	0.000808475	31	54	0.332356
CSRI.f0767	0.837378	-6.49017	4.54651e-10	152	101	0.327498
chorea.score	0.823934	-17.0721	1.57292e-60	979	759	0.322241
Motor.f0212	0.82048	-16.9741	6.35529e-60	981	764	0.32089	diagconf
Motor.f2450	0.765721	-8.4315	3.84035e-16	292	200	0.299474	chorea
finger.score	0.731336	-15.1355	1.05074e-48	980	758	0.286026
Motor.f0191	0.72411	-15.0004	6.41017e-48	980	758	0.2832	prosuphandsright,prosupr
Care.f0864	0.723584	-5.30382	2.61601e-07	165	72	0.282993	crgvr1
WHODAS.f2412	0.722729	-3.70199	0.000303909	51	95	0.282659	whodasc2_5
Cognitive.f2532	0.716073	3.93583	0.000122813	119	45	0.280056	TA5TSE_RECIP
Cognitive.f0237	0.715669	13.9284	1.32538e-41	833	697	0.279898	scnt1
brady.score	0.710066	-14.7042	3.24086e-46	978	759	0.277707
Motor.f0196	0.710066	-14.7042	3.24086e-46	978	759	0.277707	bradkinbody,brady
oculo.score	0.707195	-14.638	7.72388e-46	979	758	0.276584
CareQoL.f0424	0.707128	-3.07241	0.00287176	31	54	0.276558
WPAI.f0595	0.70527	4.54325	1.0858e-05	53	109	0.275831
Motor.f0190	0.703971	-14.5706	1.85185e-45	980	759	0.275323	fingertapsleft,fingtapl
Motor.f0202	0.700551	-14.5127	3.94827e-45	979	759	0.273985	choreaface,chorface
Motor.f0205	0.698243	-14.4559	8.25418e-45	979	759	0.273083	chorearue,chorrue
Motor.f0192	0.696768	-14.4318	1.12382e-44	980	759	0.272506	prosuphandsleft,prosupl
Motor.f0203	0.689331	-14.2825	7.72779e-44	979	759	0.269597	chorbol,choreabol
Cognitive.f2530	0.682674	-4.26257	3.26408e-05	130	51	0.266994	TA5TSES
WHODAS.f2384	0.68238	-4.02039	8.6997e-05	65	108	0.266879	whodasp5_1
WHODAS.f2515	0.682011	-3.60751	0.00044187	59	71	0.266735	whodasp1_5
CareQoL.f0417	0.681156	-2.97332	0.0038671	31	53	0.2664
Functional.f0217	0.676119	13.3424	1.56151e-38	887	674	0.26443	adl,fcadl
CareQoL.f0428	0.674415	-3.02152	0.00334334	31	54	0.263764
Motor.f0206	0.670123	-13.8736	1.39122e-41	979	759	0.262085	chorealue,chorlue
Cognitive.f2525	0.666288	-4.34514	2.33481e-05	130	50	0.260585	TA2T__M
WHODAS.f2401	0.664945	-3.86244	0.000163796	62	97	0.26006	whodasp_total12
CareQoL.f0453	0.65816	2.77315	0.00685414	31	54	0.257406
Cognitive.f0667	0.654056	2.65866	0.00986601	37	30	0.255801	mdrs2
WHODAS.f2518	0.649569	-3.51952	0.000599358	59	71	0.254046	whodasp2_2
Motor.f0189	0.648873	-13.4302	3.38797e-39	980	758	0.253774	fingertapsright,fingtapr
CSRI.f0549	0.645734	-6.06968	3.16812e-09	190	183	0.252547	csri33
Cognitive.f0241	0.643248	12.5934	1.0771e-34	850	702	0.251574	stroop_correct,swr_correct,swrt1
WHODAS.f2400	0.637228	-3.07348	0.00272055	47	56	0.24922	whodasp_total36
WHODAS.f2512	0.636746	-3.48375	0.00067741	59	71	0.249031	whodasp1_2
Functional.f1249	0.636102	7.01536	6.81727e-12	343	205	0.248779	fafinan,finances,finances_function,uhdrs46
Summary.f0780	0.632722	-6.84569	1.76841e-11	459	191	0.247458	dxentire
WHODAS.f2439	0.629847	-3.49105	0.000643923	51	91	0.246333	whodasc_total12
CareQoL.f0407	0.618381	2.67129	0.00909151	31	54	0.241849
Summary.f0778	0.617413	6.8976	1.25972e-11	461	189	0.24147	impwrsex
CareQoL.f0419	0.615729	-2.60371	0.0109232	31	54	0.240812
WHODAS.f2405	0.614321	-3.3908	0.000898154	53	94	0.240261	whodasc1_4
CareQoL.f0447	0.608107	-2.3296	0.0222569	31	54	0.237831
Motor.f0186	0.60487	-12.5198	1.71427e-34	979	758	0.236565	sacvelocityver,sacvelv
Motor.f0204	0.601855	-12.468	3.11238e-34	979	759	0.235385	choreatrunk,chortrnk
WHODAS.f2422	0.595962	-3.33034	0.00109031	53	100	0.233081	whodasc5_1
Motor.f0181	0.594923	-12.3226	1.64673e-33	980	758	0.232675	ocularh,ocupursuithor
WHODAS.f2516	0.592397	-3.24948	0.00147717	59	71	0.231687	whodasp1_6
CSRI.f0551	0.585881	-5.46332	8.58448e-08	190	183	0.229138	csri34
SF.f0820	0.582675	4.89978	1.61168e-06	161	126	0.227884	activitiesv,pf01
Functional.f1248	0.580776	5.24882	2.862e-07	235	74	0.227141	uhdrs45,volunt,volunteer
Functional.f1253	0.580418	6.57668	1.21411e-10	302	200	0.227001	automobile,drive,uhdrs50
Cognitive.f0654	0.576204	3.68382	0.000276273	245	34	0.225353	cogscore
CareQoL.f0443	0.574904	-2.39531	0.0188567	31	54	0.224845
Motor.f2446	0.573173	-6.2828	7.34912e-10	293	199	0.224168	oculo
WHODAS.f2408	0.57265	-3.23285	0.00150518	53	100	0.223963	whodasc2_1
Motor.f0185	0.57259	-11.8514	3.26369e-31	980	758	0.22394	sacvelh,sacvelocityhor
WHODAS.f2519	0.570267	-3.0502	0.00278032	59	71	0.223032	whodasp2_3
Motor.f0187	0.569349	-11.801	5.68504e-31	979	759	0.222673	dysarth,dysarthria
WHODAS.f2396	0.566389	-3.45127	0.000703008	64	109	0.221515	whodasp6_5
WHODAS.f2379	0.562799	-3.28976	0.00121765	65	108	0.220111	whodasp4_1
Motor.f0207	0.558917	-11.5746	6.72788e-30	979	759	0.218592	chorearle,chorrle
Motor.f0210	0.557753	-11.5426	9.53555e-30	977	759	0.218137	tandem,tandemwalk
CareQoL.f0408	0.557711	2.39537	0.0188539	31	54	0.218121
Motor.f0208	0.556331	-11.5193	1.2226e-29	979	759	0.217581	chorealle,chorlle
WHODAS.f2385	0.555324	-3.02553	0.00300932	59	69	0.217187	whodasp5_2
CareQoL.f0430	0.55332	-2.53571	0.013097	31	54	0.216404
Motor.f0182	0.549129	-11.3673	6.2369e-29	980	758	0.214764	ocularv,ocupursuitver
CareQoL.f0429	0.549013	-2.49215	0.0146869	31	54	0.214719
WHODAS.f2520	0.545962	-2.95224	0.00375405	59	71	0.213526	whodasp2_4
WHODAS.f2386	0.545229	-2.95994	0.00367222	59	70	0.213239	whodasp5_3
WHODAS.f2411	0.544482	-2.78487	0.00626377	50	67	0.212947	whodasc2_4
WHODAS.f2517	0.54027	-3.29409	0.00120283	65	106	0.211299	whodasp2_1
WHODAS.f2514	0.536692	-3.18917	0.00171496	64	99	0.2099	whodasp1_4
Functional.f1254	0.53466	4.84928	1.97239e-06	235	74	0.209106	houeswork,housewrk,uhdrs51
Scl90r.f2472	0.533563	-4.63877	5.23446e-06	191	112	0.208676	tsclgsi_p
Care.f0865	0.529205	-3.7627	0.000212323	165	72	0.206972	crgvr2
MRI.f2498	0.525279	-3.75771	0.000222176	126	86	0.205437	csf
WHODAS.f2383	0.525088	-2.64531	0.00928315	51	68	0.205362	whodasp4_5
WHODAS.f2392	0.521168	-3.06033	0.00257442	63	107	0.203829	whodasp6_1
MRI.f2506	0.520713	3.7082	0.000267143	126	86	0.203651	frontal_w
Cognitive.f0229	0.517782	10.271	5.23533e-24	887	708	0.202505	sdmt_correct,sdmt1
Scl90r.f2474	0.51304	-4.42115	1.38626e-05	184	110	0.20065	tsclpsdi_p
WHODAS.f2394	0.512192	-2.69421	0.00800981	58	71	0.200318	whodasp6_3
Summary.f0779	0.512185	5.75343	1.34813e-08	461	190	0.200315	impwrssj
Care.f0866	0.510042	-3.78097	0.000198354	164	72	0.199477	crgvr3
Cognitive.f0664	0.504906	-2.19819	0.0308627	42	39	0.197469	hvlt5
Motor.f2449	0.503907	-5.62517	3.1196e-08	292	200	0.197078	dystonia
CareQoL.f0404	0.502853	2.14757	0.0346295	31	55	0.196666
Functional.f1256	0.501844	4.72051	3.58126e-06	235	74	0.196271	prepmeal,prepmeals,uhdrs53
Functional.f1252	0.494325	5.64209	2.80512e-08	305	201	0.193331	children,children_function,supchild,uhdrs49
Motor.f0188	0.488478	-10.1229	1.93266e-23	978	757	0.191044	tongue,tonprotrusion
Motor.f0184	0.482222	-9.97975	7.60998e-23	980	758	0.188597	sacinitiationver,sacinitv
dystonia.score	0.481197	-9.98957	6.93521e-23	979	758	0.188196
CareQoL.f0420	0.476758	-2.04359	0.0441652	31	54	0.18646
WHODAS.f2393	0.472767	-2.53833	0.0123465	58	71	0.184899	whodasp6_2
CareQoL.f0416	0.470873	-2.08472	0.0402065	31	53	0.184158
WHODAS.f2511	0.466462	-2.81016	0.00552595	65	109	0.182433	whodasp1_1
WHODAS.f2437	0.465787	-2.33285	0.0214257	49	66	0.182169	whodasc6_8
WHODAS.f2425	0.46499	-2.36867	0.0195498	49	66	0.181857	whodasc5_4
MRI.f2495	0.462578	-3.33298	0.00101541	126	86	0.180914	crblwm
Behaviour.f0915	0.460352	-4.80393	2.04979e-06	369	142	0.180044	apathsv
Care.f0867	0.458837	-3.46476	0.000630654	165	72	0.179451	crgvr4
CareQoL.f0422	0.457409	-1.94745	0.0548616	31	54	0.178892
Motor.f0183	0.457274	-9.46002	9.62883e-21	980	758	0.17884	sacinith,sacinitiationhor
WHODAS.f2513	0.449058	-2.47099	0.0147885	59	71	0.175627	whodasp1_3
CSRI.f0485	0.448495	-4.25201	2.68601e-05	189	183	0.175406	csri9
MRI.f2497	0.44808	3.1915	0.00163243	126	86	0.175244	crbrwm
Functional.f1264	0.447402	4.38489	1.59626e-05	235	74	0.174979	uhdrs61,walkfall,walkfalling
MRI.f2507	0.4447	3.1752	0.00172243	126	86	0.173922	parietal_w
WHODAS.f2403	0.440506	-2.27544	0.0247481	49	67	0.172282	whodasc1_2
WHODAS.f2406	0.440332	-2.29024	0.0238306	50	67	0.172214	whodasc1_5
MRI.f2509	0.429409	3.05947	0.00250625	126	86	0.167942	temporal_w
Cognitive.f0245	0.420281	8.09859	1.13997e-15	826	676	0.164372	sit1
SF.f0369	0.416759	4.75702	2.50077e-06	221	343	0.162995	pcs,pcsum
Behaviour.f0914	0.416389	-4.31421	1.92476e-05	369	142	0.16285	apathfr
CSRI.f0515	0.415528	-3.89661	0.000115882	189	181	0.162513	csri19
WHODAS.f2387	0.414579	-2.25944	0.0255736	59	69	0.162142	whodasp5_4
SF.f0830	0.413709	3.46555	0.000611222	160	125	0.161802	physiccut,rp01
Scl90r.f2476	0.412965	-3.97164	8.51591e-05	242	146	0.161511	tobsess_c
Functional.f1250	0.41117	3.68678	0.00026847	235	74	0.160809	groceries,grocery,uhdrs47
SF.f0831	0.408029	3.41809	0.000723279	160	125	0.15958	physicacc,rp02
CareQoL.f0455	0.406889	-1.84473	0.0686873	30	54	0.159134
Motor.f0197	0.405603	-8.41364	8.18615e-17	979	759	0.158631	dysttrnk,maxdystrunk
CareQoL.f0406	0.396885	-1.88228	0.0632605	31	55	0.155222
WHODAS.f2399	0.39609	-2.12471	0.0355797	57	70	0.154911	whodasp6_8
WHODAS.f2395	0.395393	-2.17157	0.0317315	59	71	0.154638	whodasp6_4
rigidity.score	0.394461	-8.15785	6.48389e-16	976	757	0.154274
Motor.f0198	0.394444	-8.18355	5.27175e-16	979	759	0.154267	dystrue,maxdysrue
WHODAS.f2374	0.394117	-2.34765	0.0200502	64	107	0.154139	whodasp2_5
SF.f0371	0.393854	-2.88249	0.00422297	73	237	0.154036
SF.f0825	0.393445	3.30916	0.00105604	161	126	0.153876	bending,pf06
SF.f0857	0.392833	3.13841	0.00189841	137	120	0.153637	gh,gh_nbs
WHODAS.f2397	0.392711	-2.11493	0.0363742	59	71	0.153589	whodasp6_6
Scl90r.f2467	0.392474	-3.82445	0.000152841	253	134	0.153496	tanxiety_p
WHODAS.f2398	0.390912	-2.11572	0.036353	57	70	0.152886	whodasp6_7
WHODAS.f2404	0.389435	-2.03538	0.0441117	50	67	0.152308	whodasc1_3
Motor.f0194	0.388843	-8.04217	1.62011e-15	976	758	0.152076	rigarmr,rigarmsright
SF.f0821	0.38801	3.26344	0.00123474	161	126	0.151751	activitiesm,pf02
Cognitive.f0233	0.387906	5.05638	5.39024e-07	287	456	0.15171	verfct5
SF.f0823	0.385582	3.24206	0.00132763	161	126	0.150801	climbings,pf04
Motor.f0199	0.385453	-7.99497	2.34423e-15	979	758	0.150751	dystlue,maxdyslue
Cognitive.f0657	0.384176	1.72381	0.0886544	42	39	0.150251	hvltt11
Scl90r.f2485	0.382799	-3.19264	0.00155949	195	107	0.149713	tsclpst_c
CareQoL.f0405	0.377389	1.67389	0.0980104	30	53	0.147597
SF.f0862	0.37732	2.87761	0.00438249	121	112	0.14757	sfscore
CareQoL.f0439	0.375788	-1.5761	0.118808	31	54	0.146971
SF.f0822	0.372967	3.1317	0.00191939	161	125	0.145867	lifting,pf03
WHODAS.f2430	0.372028	-2.05517	0.0416956	52	92	0.1455	whodasc6_1
WHODAS.f2427	0.368988	-1.52988	0.130826	32	36	0.144311	whodasc5_6
SF.f0832	0.367262	3.07099	0.00234173	160	124	0.143636	physiclimit,rp03
WHODAS.f2438	0.366679	-1.8078	0.0736744	43	58	0.143408	whodasc_total36
CareQoL.f0454	0.364387	1.64368	0.104071	30	54	0.142512
WHODAS.f2423	0.364378	-1.8669	0.0645074	49	66	0.142508	whodasc5_2
CareQoL.f0397	0.363352	-1.75132	0.0835852	30	55	0.142107
Physio.f0323	0.363218	-1.86651	0.0639898	49	98	0.142055	tug1
Scl90r.f2465	0.362653	-3.52742	0.000469211	258	137	0.141834	tsensitiv_p
SF.f0819	0.358753	-3.00868	0.00285914	161	125	0.140308	compared,ht
SF.f0833	0.358536	3.00385	0.00290437	160	125	0.140223	physicdiff,rp04
CareQoL.f0395	0.356909	-1.59476	0.114567	30	55	0.139587
Motor.f0211	0.356698	-7.36969	2.6373e-13	978	753	0.139505	retpulltest,retropls
SF.f0855	0.353588	2.84318	0.00482412	139	121	0.138288	rp,rp_nbs
SF.f0826	0.352499	2.96553	0.00327729	161	126	0.137862	pf07,walkingm
Cognitive.f0656	0.348587	-1.50221	0.137357	41	34	0.136332	hvltd
Behaviour.f0919	0.344779	-3.49556	0.000516125	354	137	0.134843	deprrfr
CareQoL.f0421	0.340837	1.43125	0.156112	31	54	0.133302
SF.f0368	0.339461	-4.15497	3.73732e-05	230	359	0.132763	mh,mh_nbs,mhsubscore
WHODAS.f2377	0.338076	-1.80621	0.0732349	59	71	0.132221	whodasp3_3
Cognitive.f0663	0.337349	1.48915	0.14043	42	39	0.131937	hvlt4
Cognitive.f0249	0.335869	-4.78128	2.03436e-06	403	498	0.131359	traila_time,trla1
Motor.f0195	0.335605	-6.94169	5.45787e-12	976	758	0.131255	rigarml,rigarmsleft
BDI.f2462	0.334644	-2.81103	0.00525471	209	101	0.130879	bdiscore,bditotal
WHODAS.f2417	0.334558	-1.90075	0.0592659	53	98	0.130846	whodasc4_1
MMSE.f0321	0.334319	2.03335	0.0429954	67	205	0.130752
Scl90r.f2466	0.334242	-3.17693	0.0016082	251	137	0.130722	tdepress_p
CSRI.f0459	0.334103	-1.45517	0.148664	38	67	0.130668	csri1a
WPAI.f0594	0.333855	-2.02228	0.0448138	53	109	0.130571	wpaiscr4
WPAI.f0600	0.333855	-2.02228	0.0448138	53	109	0.130571
SF.f0848	0.333221	2.7918	0.00559848	160	125	0.130323	tired,vt04
Scl90r.f2464	0.332687	-3.38959	0.000764713	263	168	0.130114	tobsess_p
Cognitive.f0255	0.332201	5.80061	8.31887e-09	592	689	0.129924	verflt
WHODAS.f2428	0.331842	-1.35822	0.179019	32	36	0.129783	whodasc5_7
Scl90r.f2469	0.330926	-3.32829	0.000955824	262	135	0.129425	tphobic_p
CareQoL.f0427	0.330794	1.49233	0.139403	31	54	0.129373
CareQoL.f0438	0.329849	-1.42963	0.156577	31	54	0.129004
SF.f0378	0.329431	-2.16733	0.0309858	73	233	0.128841
WHODAS.f2381	0.328403	-1.8101	0.0726265	59	71	0.128439	whodasp4_3
WHODAS.f2402	0.326612	-1.87018	0.0634081	53	99	0.127738	whodasc1_1
WHODAS.f2434	0.326226	-1.92531	0.0560822	52	100	0.127587	whodasc6_5
HDCC.f0062	0.32415	-3.9003	0.000107781	262	298	0.126775	ccdep,depression
Behaviour.f0891	0.324129	-2.32165	0.0212057	108	105	0.126767	defscore
SF.f0853	0.32247	-2.69242	0.00751952	159	124	0.126118	excellent,gh05
CSRI.f0500	0.320624	-2.09842	0.0368518	97	160	0.125396	csri14
Motor.f0193	0.317521	-6.60559	5.23348e-11	992	765	0.124182	luria
WHODAS.f2433	0.31749	-1.64696	0.10237	48	66	0.12417	whodasc6_4
SF.f0846	0.314963	2.62999	0.00900937	159	124	0.123182	vt03,wornout
SF.f0824	0.314834	2.64192	0.00870061	161	125	0.123132	climbingo,pf05
SF.f0372	0.313876	2.24741	0.0253217	73	237	0.122757
Motor.f0200	0.313435	-6.50708	9.99778e-11	979	759	0.122584	dystrle,maxdysrle
SF.f0854	0.312347	2.51897	0.0123728	138	123	0.122159	pf,pf_nbs
HDCC.f0060	0.312008	-3.86113	0.000126155	254	303	0.122026	ccmtr,motor
WHODAS.f2436	0.311598	-1.65905	0.0998545	49	67	0.121866	whodasc6_7
SF.f0858	0.309911	2.48492	0.0135949	136	123	0.121206	vt,vt_nbs
Behaviour.f0907	0.309273	-3.29105	0.00106768	367	142	0.120957	obsesssv
HDCC.f0071	0.308653	-2.164	0.0315876	81	132	0.120714	ccpobage,obsessage
Scl90r.f2473	0.308249	-2.58914	0.0101037	184	110	0.120556	tsclpst_p
Care.f0871	0.306606	-2.18634	0.0297779	165	72	0.119914	crgvr8
WHODAS.f2414	0.305744	-1.61106	0.109268	53	99	0.119576	whodasc3_2
Cognitive.f0668	0.29997	-1.21579	0.228462	37	30	0.117318	mdrs3
WHODAS.f2382	0.29728	-1.51608	0.132318	53	61	0.116266	whodasp4_4
Scl90r.f2470	0.294591	-3.05656	0.00237716	261	175	0.115215	tparanoid_p
WHODAS.f2378	0.294489	-1.50531	0.134918	55	65	0.115174	whodasp3_4
Cognitive.f0252	0.292386	-4.23637	2.50735e-05	401	494	0.114352	trailb_time,trlb1
Functional.f1262	0.291659	2.60883	0.00953	235	74	0.114068	pubtrans,transportation,uhdrs59
Behaviour.f0920	0.29143	-3.03471	0.00253591	354	137	0.113978	irritrfr
Scl90r.f2468	0.288965	-2.97358	0.00310988	255	175	0.113014	thostility_p
WHODAS.f2375	0.285849	-1.67704	0.0953516	65	109	0.111795	whodasp3_1
Functional.f0218	0.285017	5.62861	2.15055e-08	887	674	0.11147	carelevl,fccarelevel
SF.f0835	0.283618	2.38142	0.0179052	160	126	0.110923	emotionacc,re02
MRI.f2508	0.282852	2.02191	0.0444541	126	86	0.110624	occipital_w
FrSBeS.f1300	0.280877	-1.99619	0.0471872	94	121	0.109851	exec_p,execdysscore
Scl90r.f2478	0.280295	-2.53811	0.0115794	230	121	0.109624	tdepress_c
CareQoL.f0393	0.279041	1.21499	0.227776	31	55	0.109133
WHODAS.f2415	0.278014	-1.44482	0.151252	50	66	0.108731	whodasc3_3
SF.f0366	0.277774	-3.48745	0.00052381	234	360	0.108638	sf,sf_nbs,sfsubscore
MRI.f2499	0.276984	-2.01329	0.0453603	126	86	0.108328	vb
CSRI.f0547	0.27687	-2.5382	0.0115518	190	182	0.108284	csri32
Behaviour.f0906	0.276052	-2.91705	0.00369024	367	142	0.107964	obsessfr
Behaviour.f0917	0.275124	-3.10326	0.00202484	354	137	0.107601	dement
MHx.f0103	0.27318	2.55746	0.0109648	193	159	0.106841	hxtobab,smoking,smoking_hx
CareQoL.f0412	0.272885	1.19475	0.235586	31	54	0.106725
Care.f0875	0.272735	-1.93871	0.0537341	165	72	0.106666	crgvr12
MRI.f2510	0.271876	1.93723	0.0540587	126	86	0.106331	icv_gw
Functional.f1255	0.270896	2.64368	0.00856898	274	79	0.105948	laundry,uhdrs52
FrSBeF.f1348	0.270716	1.93872	0.0540413	81	108	0.105877	apathy_c,apathyscore_f
HDCC.f0068	0.269533	-3.20222	0.00144069	262	303	0.105414	apathy,ccapt
CSRI.f0461	0.268686	-2.56706	0.0106489	189	183	0.105083	csri2
Scl90r.f2471	0.267968	-2.59364	0.00985602	258	132	0.104802	tpsychoticism_p
Behaviour.f0888	0.267321	-2.58949	0.00991246	334	134	0.104549	behscore
Enrollment.f0099	0.267239	1.29187	0.198415	53	97	0.104517
WHODAS.f2429	0.265444	-1.09123	0.279141	32	36	0.103815	whodasc5_8
Behaviour.f0889	0.264078	-2.6386	0.00857931	370	142	0.103281	biscore
FrSBeS.f1299	0.263908	-1.83189	0.0683909	92	119	0.103214	disin_p,disinhibscore
SF.f0375	0.262363	1.95048	0.0520346	72	235	0.10261
Cognitive.f2459	0.260896	1.62051	0.106816	136	52	0.102036	anarterr
SF.f0850	0.260654	2.17777	0.0302549	158	125	0.101942	gh02,sick
CareQoL.f0433	0.257974	-1.16457	0.24753	31	54	0.100893
CSRI.f0490	0.257212	1.2266	0.223482	33	51	0.100595	csri10b
HDCC.f0070	0.256016	-3.01881	0.00265238	261	305	0.100128	ccpob,obsessive
CareQoL.f0425	0.25352	1.13228	0.260777	31	54	0.0991515
Motor.f0201	0.253166	-5.25228	1.68746e-07	979	759	0.0990133	dystlle,maxdyslle
PBAs.f0341	0.25073	-2.8743	0.00419751	209	374	0.0980605	basapath,pbas6sv
CSRI.f0484	0.248505	1.82423	0.0697141	70	119	0.0971903	csri8b
MRI.f2489	0.247834	1.78104	0.0763514	126	86	0.096928	putamen
Medical.f0140	0.247186	-1.95987	0.0508319	80	260	0.0966744	cafpd
Care.f0884	0.246143	-1.76263	0.0792848	162	71	0.0962667	crgvr21
Care.f0883	0.244088	-1.68151	0.0940335	161	69	0.0954627	crgvr20
CareQoL.f0410	0.242874	1.02417	0.308732	31	54	0.0949882
WHODAS.f2424	0.242238	-1.24957	0.213994	50	67	0.0947394	whodasc5_3
PBAs.f0606	0.24116	2.12627	0.0341455	113	257	0.0943175	basdeprworst,pbas1wo
WHODAS.f2410	0.239941	-1.26302	0.209138	50	67	0.0938409	whodasc2_3
PBAs.f0342	0.238927	-2.75256	0.00609798	209	374	0.0934445	basapathfre,pbas6fr
CSRI.f0553	0.237059	-2.20606	0.0279974	188	182	0.0927137	csri35
CSRI.f0573	0.236735	2.23908	0.0260103	98	160	0.0925869	csri45
Summary.f0777	0.235907	-2.6868	0.00739855	461	191	0.0922631	visitprp
MMSE.f0310	0.233138	1.52283	0.12897	67	205	0.0911804
CareQoL.f0450	0.233087	1.05439	0.294765	31	54	0.0911605
HDCC.f0067	0.231819	-1.53967	0.125331	75	114	0.0906642	ccvabage,violentage
CSRI.f0773	0.231318	-1.02658	0.307637	30	54	0.0904686	csri58
SF.f0836	0.230188	1.9282	0.0548305	160	125	0.0900266	emotioncare,re03
MMSE.f0301	0.22945	-1.83746	0.0672416	67	205	0.089738
WHODAS.f2407	0.228317	-1.19763	0.233525	50	67	0.0892947	whodasc1_6
CareQoL.f0389	0.227531	-1.26564	0.209142	31	55	0.0889874
CareQoL.f0449	0.224956	1.05103	0.296296	31	54	0.0879803
Scl90r.f2463	0.223764	-2.14338	0.032696	258	137	0.087514	tsomatiz_p
CSRI.f0524	0.221081	1.97578	0.0492581	97	160	0.086465	csri22
SF.f0856	0.217668	1.76023	0.0795403	139	124	0.0851298	bp,bp_nbs
Behaviour.f0905	0.216843	-2.19913	0.0283203	366	142	0.0848073	irritsv
CSSRS.f0278	0.216297	-1.27721	0.20285	79	147	0.0845938	sbh6
FrSBeS.f1297	0.216262	-1.51821	0.130494	92	116	0.0845801	frsbescore,frsbetot_participant
Functional.f1258	0.21514	1.90949	0.0571313	235	74	0.0841411	medications,ownmeds,uhdrs55
CSRI.f0537	0.214255	1.85993	0.064052	97	159	0.083795	csri27
SF.f0365	0.21397	-2.68363	0.0074882	230	359	0.0836837	vt,vt_nbs,vtsubscore
SF.f0851	0.212083	-1.7717	0.0775274	158	125	0.0829458	gh03,healthy
CareQoL.f0411	0.211802	0.929797	0.355173	31	54	0.0828359
Cognitive.f0670	0.210198	0.855845	0.395227	37	30	0.0822086	mdrs5
Scl90r.f2486	0.209662	-1.93218	0.054124	240	121	0.0819989	tsclpsdi_c
WHODAS.f2409	0.209226	-1.12643	0.262348	49	67	0.0818284	whodasc2_2
CSRI.f0567	0.207206	-1.36312	0.174043	98	160	0.0810384	csri42
MRI.f2503	0.205438	-1.46608	0.144121	126	86	0.0803466	parietal_g
WHODAS.f2388	0.201291	-0.99507	0.322012	39	67	0.0787248	whodasp5_5
Scl90r.f2484	0.201192	-1.68953	0.0921502	196	108	0.0786862	tsclgsi_c
CSSRS.f0260	0.200849	-1.39744	0.163663	79	147	0.0785522	sid2
Scl90r.f2477	0.20041	-1.77493	0.0767596	240	120	0.0783805	tsensitiv_c
WHODAS.f2376	0.198909	-1.22192	0.22342	65	108	0.0777935	whodasp3_2
PBAs.f0343	0.19782	-2.15893	0.0312809	187	373	0.0773675	baspersev,pbas7sv
Care.f0880	0.197434	-1.37783	0.169573	165	71	0.0772166	crgvr17
CareQoL.f0409	0.195998	0.830798	0.408471	31	54	0.0766547
WHODAS.f2380	0.195906	-1.17729	0.240716	65	108	0.0766189	whodasp4_2
PBAs.f0329	0.194492	-2.06348	0.0395468	170	369	0.076066	aptscore
Cognitive.f0662	0.192976	-0.8541	0.395632	42	39	0.075473	hvlt3
CSRI.f0585	0.192284	1.81865	0.070133	98	160	0.0752021	csri51
CSRI.f0569	0.192284	1.81865	0.070133	98	160	0.0752021	csri43
Scl90r.f2479	0.191026	-1.74062	0.0826235	233	121	0.0747102	tanxiety_c
SF.f0364	0.19095	-2.35392	0.0189055	231	358	0.0746807	gh,gh_nbs,ghsubscore
Enrollment.f0647	0.188437	-1.07951	0.281995	102	59	0.0736976
PBAs.f0328	0.186555	-1.69127	0.0913669	169	368	0.0729617	psyscore
Care.f0885	0.1843	-1.30222	0.194132	163	71	0.0720796	crgvr22
HDCC.f0075	0.184224	-2.18667	0.0291763	263	304	0.07205	cccog,dementia
PBAs.f0359	0.184057	-1.5717	0.116972	120	214	0.0719847	bashousehold,pbahshd
HADS.f0384	0.183748	-2.2222	0.0266457	261	335	0.0718638	depscore,hads_depscore
Cognitive.f0244	0.183488	3.15514	0.00164162	592	688	0.0717621	sit
MMSE.f0303	0.1828	0.993848	0.321187	67	205	0.0714931
MMSE.f0318	0.1828	0.993848	0.321187	67	205	0.0714931
Care.f0887	0.182521	-1.28721	0.199314	162	70	0.0713841	crgvr24
CSRI.f0482	0.18219	-1.76087	0.0790895	190	181	0.0712543	csri8
MMSE.f0298	0.181874	1.15958	0.247245	67	205	0.0711308
WHODAS.f2432	0.181631	-0.95415	0.342026	49	67	0.0710361	whodasc6_3
Enrollment.f0097	0.181339	-1.17115	0.24342	53	97	0.0709216
PBAs.f0608	0.18108	1.61355	0.107483	113	257	0.0708204	basanxworst,pbas3wo
MRI.f2491	0.179847	1.28643	0.199709	126	86	0.070338	thalamus
CSRI.f0546	0.178857	-0.958074	0.340089	37	77	0.069951	csri31a
SF.f0834	0.178794	1.50094	0.134482	160	126	0.0699265	emotioncut,re01
SF.f0852	0.178719	1.48922	0.137555	158	124	0.069897	gh04,worse
HDCC.f0064	0.177138	-2.14507	0.0323711	264	305	0.0692787	ccirb,irritability
HDCC.f0077	0.176951	1.48336	0.138798	88	299	0.0692054	hxsid
Care.f0870	0.175561	1.21941	0.223912	165	72	0.0686617	crgvr7
HDCC.f0066	0.175492	-2.07151	0.0387645	262	305	0.0686349	ccvab,violent
Behaviour.f0918	0.17442	-1.76211	0.0786752	354	137	0.0682155	deprexam
MHx.f0102	0.171902	1.57021	0.117331	173	157	0.067231	alcoholabuse,hxalcab
Medical.f0135	0.171177	2.40707	0.0162995	322	507	0.0669472	alcab
Motor.f2448	0.17103	-1.87575	0.0612863	290	200	0.0668897	rigidity
CareQoL.f0426	0.170027	-0.765457	0.446171	31	54	0.0664976
CSRI.f0545	0.169982	-1.63761	0.102352	189	183	0.0664798	csri31
PBAs.f0347	0.169557	-1.75716	0.0794167	209	374	0.0663139	basdel,pbas9sv
CSRI.f0583	0.168647	-1.10945	0.268275	98	160	0.0659578	csri50
Care.f0886	0.168462	-1.17147	0.242612	163	71	0.0658855	crgvr23
SF.f0374	0.166384	1.25928	0.208887	73	236	0.0650726
SF.f0860	0.166266	1.34703	0.17914	139	124	0.0650266	re,re_nbs
CSRI.f0521	0.166053	-0.63271	0.528201	33	82	0.0649433	csri21
SF.f0842	0.164651	1.38268	0.167848	160	126	0.064395	dumps,mh02
HDCC.f0061	0.164198	-1.82787	0.0681555	222	288	0.0642178	ccmtrage,motorage
WHODAS.f2426	0.16406	-0.823011	0.41246	35	67	0.0641638	whodasc5_5
SF.f0381	0.163961	-1.23554	0.217577	73	235	0.0641252
MMSE.f0319	0.163588	-1.75591	0.0802375	67	205	0.0639795
MMSE.f0304	0.163588	-1.75591	0.0802375	67	205	0.0639795
MRI.f2502	0.163241	-1.16674	0.244638	126	86	0.0638436	frontal_g
SF.f0367	0.162786	-1.9823	0.0479096	232	360	0.0636654	re,re_nbs,resubscore
Enrollment.f0100	0.162515	0.9113	0.363619	53	97	0.0635596
HDCC.f0080	0.162048	-1.78503	0.074867	212	286	0.063377	hddiagn,hddiagnosed
SF.f0838	0.161716	1.35703	0.17585	160	126	0.063247	bodypain,bp01
Behaviour.f0900	0.161273	1.5618	0.118955	370	142	0.0630738	suicfr
Care.f0873	0.160731	-1.13084	0.259279	164	72	0.0628619	crgvr10
CareQoL.f0445	0.160369	-0.672631	0.503073	30	54	0.0627201
Physio.f0322	0.16011	0.849578	0.396905	50	103	0.0626189	tug
PBAs.f0616	0.159825	-1.29222	0.197091	113	257	0.0625077	basorientworst,pbas11wo
Cognitive.f0669	0.159686	-0.651261	0.517174	37	30	0.0624533	mdrs4
CareQoL.f0418	0.159346	0.713779	0.477366	31	54	0.0623202
CSSRS.f0273	0.159176	1.24938	0.212829	79	147	0.0622537	sbh3
WHODAS.f2416	0.158839	-0.781688	0.436191	46	59	0.0621219	whodasc3_4
Behaviour.f0902	0.158252	-1.63697	0.102253	370	142	0.0618925	aggrfr
Scl90r.f2480	0.157951	-1.53404	0.125829	240	153	0.0617746	thostility_c
Functional.f1273	0.157697	1.75044	0.0806517	305	201	0.0616751	fcinfosource,tfcsrc,uhdrs75
SF.f0818	0.156904	1.32998	0.184551	173	124	0.061365	general,general_sf36,gh01
HADS.f0387	0.156655	-1.82259	0.0688833	242	337	0.0612679	inwardirrscore,inwscore
Functional.f2455	0.155455	1.2965	0.195898	142	133	0.0607984	uhdrs82
Care.f0877	0.153646	-1.08259	0.280109	163	72	0.0600908	crgvr14
SF.f0380	0.153341	-1.13395	0.257703	73	235	0.0599718
Cognitive.f0666	0.152874	0.623112	0.535391	37	30	0.0597889	mdrs1
PBAs.f0327	0.152609	-1.59474	0.111358	170	369	0.0596854	irascore
Behaviour.f0898	0.151343	-1.56271	0.11874	370	142	0.0591903	anxifr
CSRI.f0518	0.151036	-1.07592	0.282981	97	160	0.05907	csri20
emplnrd	0.151	0.948869	0.344026	47	126	0.0590563
SF.f0829	0.15047	1.25906	0.20905	159	125	0.0588487	bathing,pf10
MRI.f2505	0.150126	1.06926	0.286181	126	86	0.0587141	temporal_g
CareQoL.f0436	0.150101	0.668463	0.505693	31	54	0.0587043
SF.f0839	0.149315	1.24951	0.212509	160	125	0.0583972	bp02,interferework
CareQoL.f0437	0.148131	-0.665439	0.507615	31	54	0.0579339
SF.f0373	0.148003	1.08166	0.280259	72	234	0.0578838
MMSE.f0311	0.147924	1.01905	0.309092	67	205	0.0578532
Cognitive.f1134	0.147018	0.942891	0.346795	163	54	0.0574987	emo_negative_numbercorrect,NEGSUM_STATIC
Functional.f1271	0.146574	-1.61289	0.107397	305	199	0.0573251	fasrc,funcassfrom,uhdrs68
MRI.f2487	0.146086	-1.04721	0.296208	126	86	0.0571344	scan_id
MHx.f0107	0.144839	1.32351	0.186588	173	157	0.0566465	druguse,hxdrugab
HDCC.f0069	0.144708	-1.23088	0.219323	123	182	0.0565953	apathyage,ccaptage
SF.f0849	0.144361	1.21356	0.22592	161	126	0.0564595	interferesocial,sf02
HDCC.f0081	0.143824	1.79207	0.0737171	218	291	0.0562496	raterestimate,sxest
HDCC.f0082	0.143615	-1.56119	0.119128	205	284	0.0561679	sxrater
SF.f0837	0.141212	1.18642	0.236443	161	126	0.0552281	extent,sf01
PBAs.f0344	0.141074	-1.53402	0.125604	179	369	0.055174	baspersevfre,pbas7fr
PBAs.f0356	0.139871	-1.51753	0.129676	209	374	0.0547035	basorient,pbas11sv
Cognitive.f1214	0.139844	-1.16386	0.245335	211	115	0.054693	smell_pct,upsitresponses
Behaviour.f0892	0.139798	-1.0162	0.310698	108	105	0.054675	behaviour_irascore
MMSE.f0292	0.139701	-1.18497	0.237073	67	205	0.0546372
Behaviour.f0901	0.137581	1.36487	0.172896	370	142	0.0538077	suicsv
Cognitive.f0256	0.137066	2.41503	0.0158738	752	526	0.0536066	verflt05
Cognitive.f0655	0.136363	-0.878629	0.380872	93	75	0.0533315	hvlt
CSRI.f0506	0.135643	-1.29103	0.197501	188	183	0.05305	csri16
MMSE.f0307	0.135518	-1.00017	0.318123	67	205	0.0530012
MMSE.f0306	0.134954	-0.984451	0.325775	67	205	0.0527805
Care.f0874	0.133855	-0.942019	0.347154	164	72	0.0523506	crgvr11
HDCC.f0078	0.133415	-1.43976	0.150594	200	278	0.0521786	sxsubj,symptomssubject
CareQoL.f0394	0.133365	-0.656304	0.513466	31	53	0.0521591
CSRI.f0575	0.132533	1.31413	0.189618	189	183	0.0518338	csri46
Enrollment.f0645	0.131938	0.755837	0.450858	103	59	0.0516011
PBAs.f0614	0.130738	-1.08296	0.279537	113	256	0.0511317	basdelworst,pbas9wo
HDCC.f0083	0.12982	1.34938	0.177905	168	276	0.0507726	sxestcfd
Cognitive.f0248	0.128972	-2.12166	0.034096	478	593	0.0504411	trl
Behaviour.f0916	0.128467	-1.61007	0.108027	354	137	0.0502436	confus
PBAs.f0334	0.1268	-1.37599	0.169355	208	374	0.0495915	bassuicfre,pbas2fr
MMSE.f0320	0.126788	0.806393	0.420726	67	205	0.049587
Functional.f2454	0.126377	1.04597	0.296501	142	133	0.0494261	uhdrs81
HDCC.f0076	0.126097	-1.01817	0.30949	115	162	0.0493166	cccogage,dementage
SF.f0859	0.125896	1.02421	0.306678	140	125	0.0492379	sf,sf_nbs
Scl90r.f2482	0.125829	-1.23149	0.218872	244	154	0.0492116	tparanoid_c
MRI.f2488	0.123414	-0.893161	0.372793	126	86	0.048267	caudate
FrSBeS.f1298	0.1227	-0.88851	0.375259	94	123	0.0479878	apathy_p,apathyscore
Care.f0868	0.122668	-0.869997	0.38519	165	72	0.0479756	crgvr5
SF.f0363	0.119885	-1.51834	0.129465	233	358	0.046887	bp,bp_nbs,bpsubscore
Enrollment.f0648	0.119277	0.672695	0.5023	87	49	0.0466491
Cognitive.f0240	0.118727	2.11559	0.0345635	644	700	0.0464343	stroop,swrt
Medical.f0136	0.118684	-1.20431	0.229145	202	221	0.0464173	alcunits
Behaviour.f0899	0.118561	-1.2217	0.222386	370	142	0.0463693	anxisv
CSRI.f0467	0.118506	-0.775597	0.438703	97	161	0.0463477	csri4
CSRI.f0579	0.118506	-0.779596	0.436346	98	161	0.0463477	csri48
Medical.f0139	0.118154	0.929945	0.352984	88	298	0.0462101	cafab
SF.f0841	0.118123	0.991917	0.322082	160	126	0.0461979	mh01,nervous
PBAs.f0612	0.117131	-0.939189	0.348308	85	253	0.0458101	pbas7wo
HDCC.f0063	0.11605	-1.17923	0.238966	179	249	0.0453873	ccdepage,depressage
Cognitive.f0236	0.115682	1.99744	0.0459889	592	688	0.0452431	scnt
CSRI.f0512	0.114029	-0.824426	0.410468	97	160	0.0445967	csri18
Enrollment.f0101	0.113828	-1.02301	0.307102	155	156	0.0445182
HDCC.f0079	0.113333	-1.16079	0.246372	183	248	0.0443245	sxfam,symptomsfamily
HADS.f0383	0.113242	1.36681	0.172202	260	335	0.0442891	anxscore
PBAs.f0348	0.11228	-1.2373	0.216475	209	373	0.0439129	basdelfre,pbas9fr
Enrollment.f0646	0.111961	0.701161	0.484221	103	59	0.0437878
CSRI.f0473	0.111155	-1.01631	0.310148	189	183	0.0434726	csri6
CSRI.f0555	0.111155	-1.019	0.308868	190	183	0.0434726	csri36
CSRI.f0565	0.110717	-1.04205	0.298069	190	183	0.0433014	csri41
Behaviour.f0904	0.106762	-1.07158	0.284419	366	142	0.0417546	irritfr
MMSE.f0317	0.105021	0.570978	0.568489	67	205	0.0410738
MMSE.f0299	0.105021	0.570978	0.568489	67	205	0.0410738
MMSE.f0313	0.105021	0.570978	0.568489	67	205	0.0410738
MMSE.f0314	0.105021	0.570978	0.568489	67	205	0.0410738
PBAs.f0335	0.105015	1.21961	0.223106	209	374	0.0410712	basanx,pbas3sv
PBAs.f0613	0.104863	0.956191	0.339604	113	257	0.0410118	basobscompworst,pbas8wo
PBAs.f0357	0.104368	-1.16065	0.246262	209	374	0.0408184	basorientfre,pbas11fr
PBAs.f0330	0.104352	-1.09357	0.274638	170	367	0.0408119	exfscore
FrSBeF.f1350	0.104074	-0.716616	0.474491	83	109	0.0407032	exec_c,execdysscore_f
SF.f0861	0.103904	0.834169	0.40496	136	123	0.0406368	mh,mh_nbs
Functional.f1260	0.103106	0.938372	0.348699	274	79	0.0403247	dress,uhdrs57
WHODAS.f2421	0.102591	-0.509464	0.611506	45	61	0.0401235	whodasc4_5
Scl90r.f2475	0.102027	-0.91691	0.359807	240	120	0.0399028	tsomatiz_c
Functional.f1251	0.101317	0.864349	0.388071	235	74	0.0396252	cash,money,uhdrs48
Functional.f1263	0.101317	0.864349	0.388071	235	74	0.0396252	uhdrs60,walknbr,walkneighbor
MMSE.f0294	0.100763	-0.802955	0.422707	67	205	0.0394084
Medical.f0138	0.10013	-0.753936	0.451633	92	148	0.0391608	packy
handed	0.0997854	1.18964	0.234688	260	306	0.0390261
Cognitive.f0232	0.0995835	-1.12167	0.262365	287	457	0.0389471	verfctd
MMSE.f0305	0.0990897	0.64179	0.521554	67	205	0.038754
CSRI.f0509	0.0977995	-0.730139	0.465975	97	160	0.0382494	csri17
MRI.f2504	0.0973571	0.697278	0.4864	126	86	0.0380764	occipital_g
WHODAS.f2431	0.096989	-0.523738	0.601478	50	66	0.0379324	whodasc6_2
MRI.f2494	0.0964748	0.689732	0.491124	126	86	0.0377313	crblgm
Cognitive.f0228	0.095962	1.68369	0.0924822	605	694	0.0375307	digit,sdmt
PBAs.f0338	0.0956724	-1.09914	0.27216	209	374	0.0374175	basirritfre,pbas4fr
CareQoL.f0403	0.0950833	0.432496	0.666489	31	55	0.0371871
WHODAS.f2413	0.0948734	-0.540103	0.589927	53	99	0.037105	whodasc3_1
CSRI.f0489	0.0945495	0.448067	0.655258	35	51	0.0369783	csri10a
CareQoL.f0435	0.0943485	0.406797	0.68523	31	52	0.0368997
Cognitive.f0253	0.0934025	-1.01662	0.309844	169	313	0.0365297	trlb2
Behaviour.f0909	0.0929947	-0.957406	0.338823	362	142	0.0363702	compulsv
CSRI.f0503	0.0892089	0.72448	0.469435	97	160	0.0348896	csri15
CSSRS.f0259	0.0890441	-0.633073	0.527332	79	147	0.0348252	sid1
CareQoL.f0423	0.0885283	0.388846	0.698386	31	54	0.0346234
CSRI.f0488	0.0883854	0.69087	0.490276	97	160	0.0345675	csri10
CSRI.f0543	0.088124	0.856204	0.392441	188	183	0.0344653	csri30
Functional.f1267	0.0873487	-0.560529	0.575528	235	74	0.0341621	chairs,trnchair,uhdrs64
Functional.f1257	0.0873487	-0.560529	0.575528	235	74	0.0341621	telephon,telephone,uhdrs54
Functional.f1259	0.0873487	-0.560529	0.575528	235	74	0.0341621	feed,feedself,uhdrs56
Functional.f1266	0.0873487	-0.560529	0.575528	235	74	0.0341621	comb,combhair,uhdrs63
HADS.f0386	0.0859153	1.02472	0.305928	241	335	0.0336015	outscore,outwardirrscore
HDCC.f0086	0.0849007	-0.944629	0.345302	218	287	0.0332047	majorsymptomrater,sxraterm
Medical.f0141	0.084885	-1.15278	0.249333	324	508	0.0331985	drugab
MHx.f0106	0.0847908	-0.533514	0.594442	79	78	0.0331617	hxpacky
CareQoL.f0456	0.0844845	-0.370172	0.712221	30	53	0.0330419
Behaviour.f0903	0.0838153	-0.851986	0.394622	370	142	0.0327802	aggrsv
Cognitive.f0658	0.0830807	0.373484	0.709789	42	39	0.0324929	hvltt21
Behaviour.f0896	0.0828003	-0.817586	0.414008	337	135	0.0323832	guiltfr
Care.f0882	0.0820073	-0.593357	0.553522	162	71	0.032073	crgvr19
Behaviour.f0911	0.0818642	0.760846	0.447101	369	142	0.0320171	delussv
Functional.f1261	0.0808937	-0.536412	0.592014	274	79	0.0316375	bathe,uhdrs58
Functional.f1268	0.0808937	-0.536412	0.592014	274	79	0.0316375	bed,uhdrs65
Functional.f1270	0.0808937	-0.536412	0.592014	274	79	0.0316375	carehome,uhdrs67
Functional.f1269	0.0808937	-0.536412	0.592014	274	79	0.0316375	toilet,uhdrs66
Scl90r.f2481	0.079693	-0.714032	0.475669	243	120	0.0311679	tphobic_c
PBAs.f0331	0.0789982	0.911276	0.362528	209	374	0.0308962	basdepr,pbas1sv
Cognitive.f2529	0.0786146	0.491012	0.624019	130	51	0.0307462	TA5TSEM
Behaviour.f0908	0.0778472	-0.796782	0.425954	362	142	0.030446	compulfr
CSRI.f0483	0.0777847	0.609942	0.542645	67	121	0.0304216	csri8a
SF.f0827	0.0776855	0.653196	0.514157	161	126	0.0303828	pf08,walkings
MRI.f2500	0.073665	-0.528481	0.597723	126	86	0.0288104	other
CSRI.f0559	0.0725392	-0.537465	0.591414	98	160	0.0283701	csri38
SF.f0376	0.0714309	-0.535809	0.59248	73	235	0.0279366
CSSRS.f0270	0.0709268	-0.496561	0.619986	79	147	0.0277395	sbh1
Behaviour.f0910	0.0706474	-0.718965	0.472493	369	141	0.0276302	delusfr
MMSE.f0300	0.0703474	-0.524598	0.600293	67	205	0.0275129
Behaviour.f0921	0.0703365	-0.711937	0.476831	368	142	0.0275086	isobt
Care.f0881	0.0700098	0.475325	0.635003	164	70	0.0273808	crgvr18
Cognitive.f0257	0.0691089	0.923273	0.356181	284	424	0.0270285	verflt06
Cognitive.f0659	0.0686637	0.309323	0.75789	42	39	0.0268544	hvltt31
Cognitive.f0238	0.0675462	-0.846169	0.397726	294	466	0.0264173	scnt2
Cognitive.f0242	0.0669919	-0.87227	0.383338	294	465	0.0262005	swrt2
MRI.f2492	0.0668279	0.479063	0.632392	126	86	0.0261364	accumbens
Behaviour.f0912	0.0662158	-0.728719	0.466509	368	142	0.025897	hallucfr
SF.f0362	0.0659999	-0.820709	0.412145	232	357	0.0258125	rp,rp_nbs,rpsubscore
HDCC.f0084	0.0658554	-0.710903	0.477493	200	277	0.025756	majorsymptomsubject,sxsubjm
CSRI.f0561	0.0653828	-0.625686	0.531907	190	182	0.0255712	csri39
CareQoL.f0452	0.0648702	0.291202	0.771623	31	54	0.0253707
Care.f0872	0.0640302	-0.441222	0.65946	165	71	0.0250422	crgvr9
FrSBeF.f1347	0.0636765	0.440527	0.660073	79	107	0.0249039	frsbescore_f,frsbetot_companion
PBAs.f0337	0.0634702	-0.736018	0.462017	209	374	0.0248232	basirrit,pbas4sv
CareQoL.f0431	0.0631794	-0.276862	0.782583	30	54	0.0247095
PBAs.f0358	0.0629928	-0.734438	0.462976	211	376	0.0246365	basrelative,pbainfo
CSRI.f0464	0.0622174	-0.597693	0.55041	189	183	0.0243332	csri3
CSSRS.f0275	0.0613411	-0.419622	0.675164	79	147	0.0239905	sbh4
Cognitive.f0661	0.0606565	0.276645	0.782775	42	39	0.0237227	hvlt2
CareQoL.f0451	0.0594956	0.270305	0.787597	31	54	0.0232687
Physio.f0324	0.0591767	0.329774	0.742028	50	103	0.023144	scst
motor_examiner_ext	0.0575374	0.620654	0.535123	286	194	0.0225029
MRI.f2493	0.0572215	-0.408725	0.683158	126	86	0.0223793	globus
PBAs.f0345	0.0570603	0.65275	0.514181	198	373	0.0223163	basobscomp,pbas8sv
PBAs.f0340	0.0566751	-0.647513	0.517556	209	374	0.0221656	basbehfre,pbas5fr
Care.f0879	0.0564061	-0.400485	0.689173	161	70	0.0220604	crgvr16
SF.f0370	0.0558232	-0.642041	0.521108	221	343	0.0218324	mcs,mcsum
CSRI.f0460	0.0556613	-0.252926	0.800834	38	66	0.0217691	csri1b
HDCC.f0057	0.0555846	-0.43679	0.662645	114	135	0.0217391	momagesx
MRI.f2490	0.0549295	0.391411	0.69589	126	86	0.0214829	hippocampus
CSRI.f0536	0.0545935	0.526673	0.598738	188	182	0.0213515	csri26
Functional.f1265	0.0545401	0.455991	0.648678	274	79	0.0213306	uhdrs62,walkhelp
Scl90r.f2483	0.0544884	-0.489506	0.624783	240	121	0.0213104	tpsychoticism_c
MMSE.f0315	0.051355	0.359067	0.719825	67	205	0.0200849
Behaviour.f0897	0.0513442	-0.503812	0.61463	337	135	0.0200807	guiltsv
CareQoL.f0432	0.0513019	0.233668	0.815825	30	54	0.0200642
Behaviour.f0894	0.0510792	0.510635	0.609828	370	142	0.0199771	deprfr
Enrollment.f0095	0.05075	0.442318	0.658569	155	156	0.0198483	fhx
Functional.f2452	0.049841	0.485104	0.627851	285	144	0.0194928	uhdrs76
CSRI.f0541	0.0498211	0.481982	0.630105	188	182	0.019485	csri29
PBAs.f0346	0.0493705	0.561797	0.574476	198	373	0.0193088	basobscompfre,pbas8fr
MRI.f2501	0.049195	-0.351174	0.72581	126	86	0.0192401	icv
CareQoL.f0444	0.048013	0.214812	0.830447	30	54	0.0187779
CSSRS.f0277	0.0464897	0.340755	0.733607	79	147	0.0181821	sbh5
PBAs.f0349	0.0444903	-0.478391	0.632552	209	374	0.0174001	bashall,pbas10sv
CSRI.f0533	0.0439929	0.357675	0.720882	97	160	0.0172056	csri25
Cognitive.f0222	0.0436522	0.558106	0.576936	295	470	0.0170724	gen1
PBAs.f0611	0.0434302	-0.386395	0.699427	113	257	0.0169856	basapathworst,pbas6wo
Cognitive.f0250	0.0431513	-0.466749	0.64089	170	314	0.0168765	trla2
Cognitive.f0258	0.0411932	-0.515897	0.606088	284	424	0.0161107	verflt07
PBAs.f0332	0.040066	0.460821	0.6451	209	374	0.0156698	basdeprfre,pbas1fr
Cognitive.f0246	0.0394875	-0.499197	0.617791	288	445	0.0154436	sit2
PBAs.f0609	0.0393851	-0.350552	0.726125	113	257	0.0154035	basirritworst,pbas4wo
PBAs.f0333	0.0392178	-0.447111	0.654962	208	374	0.0153381	bassuic,pbas2sv
CSRI.f0491	0.0382495	-0.29546	0.767883	97	160	0.0149594	csri11
MMSE.f0308	0.0367503	-0.264999	0.791212	67	205	0.014373
Cognitive.f0243	0.0362174	0.506395	0.612727	294	465	0.0141646	swrt3
Cognitive.f0251	0.0356549	-0.37972	0.70431	200	317	0.0139446	triala_error,trla3
MMSE.f0296	0.035055	0.244706	0.80687	67	205	0.01371
Care.f0878	0.0350276	0.245742	0.806098	164	71	0.0136993	crgvr15
Cognitive.f0239	0.0347704	-0.464405	0.642491	294	466	0.0135987	scnt3
HDCC.f0065	0.0346584	-0.336854	0.736408	164	228	0.0135549	ccirbage,irritage
CSRI.f0494	0.0346066	0.273614	0.784604	97	159	0.0135347	csri12
Cognitive.f0235	0.0342211	-0.467813	0.640056	287	456	0.0133839	verfct7
MMSE.f0312	0.0341033	-0.243939	0.807463	67	205	0.0133378
HDCC.f0085	0.0339647	0.357569	0.720837	186	257	0.0132836	majorsymptomfamily,sxfamm
Care.f0876	0.0334905	0.232988	0.815976	163	71	0.0130981	crgvr13
MMSE.f0295	0.0332488	-0.244177	0.807279	67	205	0.0130036
MMSE.f0293	0.0332488	-0.244177	0.807279	67	205	0.0130036
Behaviour.f0913	0.0328434	0.309996	0.756691	368	142	0.0128451	hallucsv
PBAs.f0607	0.032462	0.285736	0.775241	113	257	0.0126959	bassuicworst,pbas2wo
SF.f0379	0.0317175	0.231516	0.817069	73	235	0.0124047
PBAs.f0326	0.0312366	-0.328629	0.742565	170	369	0.0122166	depscore
PBAs.f0610	0.0311708	0.27836	0.780892	113	257	0.0121909	basbehworst,pbas5wo
SF.f0845	0.0305364	0.255493	0.798528	159	125	0.0119428	downheart,mh04
FrSBeF.f1349	0.0298271	-0.200989	0.840926	82	107	0.0116654	disin_c,disinhibscore_f
CSRI.f0479	0.0297501	-0.286162	0.774914	189	183	0.0116353	csri7
MMSE.f0291	0.0280513	0.208874	0.834704	67	205	0.0109709	mmsetotal
Cognitive.f0247	0.0275351	0.370118	0.711402	288	445	0.010769	sit3
MHx.f0104	0.0266838	0.120213	0.904601	32	54	0.010436	cigperday,hxtobcpd,numbercigarettes
HADS.f0385	0.0244398	-0.295806	0.767482	262	335	0.00955842	irrscore
CSRI.f0557	0.0231779	-0.179279	0.857861	98	160	0.00906487	csri37
CSRI.f0577	0.023016	0.222573	0.823991	189	183	0.00900155	csri47
PBAs.f0615	0.0226467	0.205998	0.836906	113	257	0.00885712	bashallworst,pbas10wo
CSRI.f0476	0.0225581	-0.108757	0.913588	33	82	0.00882246
MMSE.f0309	0.0219604	-0.157164	0.875233	67	205	0.0085887
Cognitive.f0254	0.0216017	-0.244297	0.807099	199	316	0.00844842	trialb_error,trlb3
CSSRS.f0272	0.0210924	0.152989	0.878545	79	147	0.00824923	sbh2
CSRI.f0497	0.0206604	-0.157887	0.874671	97	160	0.00808027	csri13
CSRI.f0530	0.0206604	-0.157887	0.874671	97	160	0.00808027	csri24
Enrollment.f0093	0.0203014	0.215813	0.829221	335	167	0.00793987	rfstdy
MRI.f2496	0.0197763	-0.141079	0.887942	126	86	0.00773452	crbrgm
SF.f0840	0.0196747	0.164951	0.8691	159	126	0.00769476	life,vt01
WHODAS.f2435	0.0188283	0.100634	0.920016	50	67	0.00736373	whodasc6_6
Cognitive.f0660	0.0185458	-0.0832081	0.933897	42	39	0.00725327	hvlt1
PBAs.f0336	0.0170353	-0.194379	0.845947	209	374	0.00666252	basanxfre,pbas3fr
Behaviour.f0895	0.0166209	0.168185	0.866505	370	142	0.00650045	deprsv
MHx.f0105	0.0164063	-0.0710238	0.943544	32	56	0.00641652	hxtobyos,smokyears
Cognitive.f0234	0.0158106	0.202834	0.83932	287	456	0.00618353	verfct6
PBAs.f0355	0.0127444	-0.143617	0.885853	208	374	0.00498432	bashallfre,pbas10fr
WHODAS.f2418	0.0126486	0.0758806	0.939617	53	97	0.00494685	whodasc4_2
Cognitive.f0230	0.01257	-0.174206	0.861751	293	466	0.00491612	sdmt2
SF.f0843	0.0122546	-0.102889	0.918123	160	126	0.00479276	calm,mh03
HDCC.f0056	0.0113046	-0.130992	0.895831	245	297	0.00442125	momhd
CSRI.f0539	0.0113038	0.108948	0.913303	188	183	0.00442093	csri28
HDCC.f0072	0.0107154	-0.127932	0.898248	269	305	0.0041908	ccpsy,psychosis
WHODAS.f2420	0.0105756	0.0541659	0.956906	47	60	0.00413611	whodasc4_4
Behaviour.f0893	0.00860531	0.0634415	0.949475	108	105	0.00336553	behaviour_psyscore
WHODAS.f2419	0.00835926	0.0453293	0.963923	50	67	0.0032693	whodasc4_3
SF.f0847	0.00706357	-0.0588541	0.95311	158	124	0.00276256	happy,mh05
CSRI.f0458	0.00653149	0.0629831	0.949814	189	183	0.00255447	csri1
SF.f0382	0.00546072	0.0402847	0.967893	73	234	0.00213569
PBAs.f0339	0.00540574	-0.0626079	0.9501	209	374	0.00211419	basbeh,pbas5sv
CSRI.f0470	0.00535264	-0.0515719	0.958898	189	183	0.00209342	csri5
SF.f0828	0.00515642	0.043338	0.965462	161	126	0.00201668	pf09,walkingo
Medical.f0137	0.00483682	0.0679966	0.945805	323	508	0.00189168	tobab
SF.f0377	0.00472542	-0.0343069	0.972655	72	235	0.00184811
HDCC.f0059	0.00436594	-0.0316848	0.974754	95	112	0.00170752	dadagesx
Cognitive.f0665	0.00436578	-0.0281304	0.977592	93	75	0.00170746	mdrs
MMSE.f0316	0.00421957	-0.0301212	0.975993	67	205	0.00165027
Cognitive.f0231	0.00331138	0.0445111	0.964509	295	470	0.00129508	verfct
CSRI.f0563	0.00315835	-0.0304203	0.975748	190	182	0.00123523	csri40
SF.f0844	0.00308677	0.02623	0.979092	170	126	0.00120724	energy,energy_sf36,vt02
HDCC.f0058	0.00278841	0.0320278	0.974462	242	290	0.00109055	dadhd
CSRI.f0589	0.00277417	-0.0266881	0.978723	189	182	0.00108498	csri53
Behaviour.f0890	0.00249419	0.0182116	0.985487	108	105	0.000975478	behaviour_depscore
Physio.f0325	0.00179748	-0.00966221	0.992304	49	100	0.000702993	scst1
SF.f0361	0.000266251	0.00325881	0.997401	231	358	0.000104131	pf,pf_nbs,pfsubscore
Care.f0869	0	0	1	165	72	0	crgvr6
Enrollment.f0096	0	0	1	156	156	0

## Sheet: jump_states_4_6
var	d	t_val	p_val	#samples_st4	#samples_st6	d_normalized	var_name
Functional.f0213	2.06302	46.0969	0	1209	845	0.721852	functionalscore,tfcscore
Motor.f0180	1.94927	-42.1748	1.25039e-275	1108	813	0.682049	miscore
Motor.f0179	1.91948	-43.2996	4.24688e-293	1228	869	0.671627	motorscore,motscore
Motor.f2447	1.89112	-10.5229	1.7988e-19	96	47	0.661703	brady_tot
Functional.f0221	1.78415	37.576	1.30802e-229	1049	786	0.624276	indepencescale,indepscl
Functional.f0214	1.63547	36.5228	1.59089e-225	1213	845	0.572249	fcoccupation,occupatn
Functional.f1246	1.52155	8.4402	3.5758e-14	100	42	0.532392	employmentaccu,emplusl,uhdrs43
Functional.f0219	1.48244	30.6811	2.02195e-166	1016	773	0.518705	fascore,functionscore
Functional.f0220	1.475	30.8663	1.13614e-168	1041	785	0.516103	fiscore
GCI.f0863	1.40055	-22.5099	6.02161e-93	720	408	0.490051	svrtyll
Functional.f1247	1.4002	8.28833	8.43875e-14	100	42	0.48993	emplany,employment,uhdrs44
Functional.f2453	1.36973	-6.78125	3.3979e-10	95	42	0.479267	uhdrs80
Functional.f0216	1.26927	28.2821	1.05035e-148	1200	838	0.444119	chores,fcdomestic
Motor.f2446	1.25299	-7.15773	4.12818e-11	96	47	0.438421	oculo
Cognitive.f0654	1.1363	9.20038	1.02247e-18	400	93	0.397593	cogscore
Functional.f0215	1.07228	24.2726	6.2578e-115	1241	862	0.375189	fcfinances,finances,finances_tfc
oculo.score	1.03484	-23.4081	6.70615e-108	1233	875	0.362092
Motor.f2449	1.02394	-6.04734	1.25316e-08	96	47	0.358278	dystonia
Motor.f0209	1.01657	-22.9833	1.76389e-104	1235	872	0.355697	gait
Motor.f0210	0.999705	-22.5931	2.2868e-101	1232	873	0.349797	tandem,tandemwalk
Motor.f0191	0.957898	-21.6646	4.00892e-94	1232	875	0.335169	prosuphandsright,prosupr
brady.score	0.944297	-21.3571	9.10713e-92	1233	875	0.33041
Motor.f0196	0.944297	-21.3571	9.10713e-92	1233	875	0.33041	bradkinbody,brady
finger.score	0.933496	-21.1147	6.4346e-90	1232	875	0.32663
Motor.f0187	0.931604	-21.0728	1.32429e-89	1233	875	0.325968	dysarth,dysarthria
chorea.score	0.92369	-20.8868	3.39486e-88	1233	874	0.323199
Functional.f0217	0.909736	20.2667	2.42106e-83	1201	838	0.318317	adl,fcadl
Functional.f1255	0.886012	6.06977	1.00236e-08	112	40	0.310016	laundry,uhdrs52
Motor.f0192	0.87899	-19.8846	9.02002e-81	1233	875	0.307559	prosuphandsleft,prosupl
Motor.f0189	0.870266	-19.6848	2.56729e-79	1232	875	0.304506	fingertapsright,fingtapr
Cognitive.f0229	0.860449	17.5803	1.18025e-63	960	727	0.301071	sdmt_correct,sdmt1
PBAHD.f0742	0.860328	-3.22648	0.00201686	32	31	0.301029	pbal19fr
Motor.f0190	0.856628	-19.3792	4.04397e-77	1233	875	0.299734	fingertapsleft,fingtapl
Scl90r.f2486	0.854282	-4.37321	2.89253e-05	75	32	0.298913	tsclpsdi_c
Motor.f0186	0.841057	-19.024	1.36257e-74	1233	875	0.294286	sacvelocityver,sacvelv
Motor.f0185	0.83911	-18.9807	2.75693e-74	1233	875	0.293605	sacvelh,sacvelocityhor
dystonia.score	0.831909	-18.7996	5.26618e-73	1233	872	0.291085
Cognitive.f0241	0.828217	16.6282	1.81645e-57	922	708	0.289793	stroop_correct,swr_correct,swrt1
Functional.f1253	0.819071	4.857	3.16722e-06	99	42	0.286593	automobile,drive,uhdrs50
Cognitive.f1134	0.816984	3.60898	0.000499866	63	31	0.285863	emo_negative_numbercorrect,NEGSUM_STATIC
PBAHD.f0741	0.807822	-3.07533	0.0031448	32	31	0.282657	pbal19sv
Cognitive.f0237	0.806295	16.1183	2.60626e-54	909	707	0.282123	scnt1
Functional.f1252	0.792712	5.00245	1.66937e-06	100	42	0.27737	children,children_function,supchild,uhdrs49
Care.f0867	0.788786	-8.4872	2.73221e-16	304	172	0.275996	crgvr4
SF.f0790	0.781156	6.5166	2.36958e-10	301	69	0.273326	sf9
SF.f0788	0.775879	5.64474	3.31501e-08	300	69	0.27148	sf7
Motor.f0184	0.771363	-17.4497	8.56148e-64	1233	875	0.2699	sacinitiationver,sacinitv
Motor.f0182	0.76268	-17.25	1.79179e-62	1233	875	0.266862	ocularv,ocupursuitver
SF.f0793	0.761967	6.12317	2.35458e-09	301	69	0.266612	sf12
Motor.f0183	0.760725	-17.2098	3.29516e-62	1233	875	0.266178	sacinith,sacinitiationhor
Motor.f0203	0.746068	-16.8756	4.99642e-60	1233	875	0.261049	chorbol,choreabol
CSRI.f0767	0.742663	-8.50729	1.69277e-16	335	217	0.259858
Care.f0864	0.74077	-7.86766	2.46828e-14	304	172	0.259196	crgvr1
Motor.f2450	0.73447	-4.115	6.55535e-05	96	47	0.256991	chorea
PBAHD.f0735	0.73052	-2.65965	0.009979	32	31	0.255609	pbal16sv
PBAHD.f0721	0.730025	-2.76048	0.00761222	32	31	0.255436	pbal9sv
Motor.f0205	0.72883	-16.4862	1.58421e-57	1233	875	0.255018	chorearue,chorrue
Motor.f0204	0.727589	-16.457	2.42712e-57	1233	875	0.254583	choreatrunk,chortrnk
SF.f0797	0.72431	6.12867	2.27639e-09	301	70	0.253436	sf16
PBAHD.f0722	0.713103	-2.69164	0.0091638	32	31	0.249515	pbal9fr
SF.f0789	0.712548	5.68872	2.61366e-08	300	70	0.249321	sf8
WPAI.f0595	0.710478	4.50338	1.24249e-05	54	117	0.248596
Care.f0865	0.707029	-7.54699	2.3072e-13	304	171	0.24739	crgvr2
PBAHD.f0736	0.70625	-2.57129	0.0125862	32	31	0.247117	pbal16fr
Motor.f0206	0.699519	-15.8233	2.25522e-53	1233	875	0.244762	chorealue,chorlue
Motor.f0181	0.698228	-15.7931	3.46255e-53	1233	875	0.24431	ocularh,ocupursuithor
Motor.f0207	0.697458	-15.7755	4.43961e-53	1233	875	0.244041	chorearle,chorrle
Motor.f0208	0.696047	-15.7441	6.92852e-53	1233	875	0.243547	chorealle,chorlle
PBAHD.f0715	0.695698	-2.66917	0.0097297	32	31	0.243425	pbal6sv
Summary.f0778	0.695458	11.1566	1.5063e-27	774	407	0.243341	impwrsex
SF.f0798	0.694898	5.4428	9.5671e-08	302	70	0.243145	sf17
Cognitive.f0245	0.69268	13.6685	2.76865e-40	895	688	0.242369	sit1
Motor.f0202	0.687672	-15.5506	1.05788e-51	1233	874	0.240616	choreaface,chorface
CSRI.f0551	0.68135	-8.72265	1.97908e-17	390	310	0.238404	csri34
Motor.f0188	0.676094	-15.2907	3.92387e-50	1233	875	0.236565	tongue,tonprotrusion
Motor.f0197	0.674054	-15.2428	7.60276e-50	1233	875	0.235851	dysttrnk,maxdystrunk
Summary.f0779	0.673059	10.8147	4.68645e-26	773	407	0.235503	impwrssj
Motor.f0211	0.670587	-15.1521	2.67417e-49	1231	873	0.234639	retpulltest,retropls
SF.f0854	0.667863	6.64178	9.7924e-11	210	205	0.233685	pf,pf_nbs
SF.f0795	0.66234	5.80678	1.38027e-08	299	70	0.231753	sf14
SF.f0820	0.658755	6.95571	1.24913e-11	236	214	0.230498	activitiesv,pf01
CSRI.f0549	0.656557	-8.46303	1.52812e-16	390	310	0.229729	csri33
SF.f0794	0.645573	5.26526	2.38899e-07	299	70	0.225886	sf13
Motor.f0198	0.643448	-14.5503	8.95256e-46	1233	875	0.225142	dystrue,maxdysrue
CSRI.f0770	0.637737	-4.36659	1.93575e-05	174	50	0.223144	csri57
SF.f0781	0.637121	4.92181	1.31532e-06	290	67	0.222929	sfscore_v1
Motor.f0199	0.631349	-14.2676	3.7374e-44	1233	872	0.220909	dystlue,maxdyslue
SF.f0802	0.627859	4.94754	1.14188e-06	303	70	0.219688	sf21
SF.f0791	0.623682	5.09224	5.65448e-07	301	70	0.218226	sf10
Motor.f0212	0.612029	-13.7405	3.70023e-41	1184	861	0.214149	diagconf
PBAHD.f0751	0.608823	-2.33679	0.0227503	32	31	0.213027	pbal24sv
SF.f0824	0.603868	6.23716	1.0319e-09	235	215	0.211294	climbingo,pf05
SF.f0800	0.600783	4.65122	4.60073e-06	302	70	0.210214	sf19
Scl90r.f2479	0.600013	-3.12356	0.00230961	75	32	0.209945	tanxiety_c
PBAHD.f0738	0.595942	-2.28488	0.0258109	32	31	0.20852	pbal17fr
Motor.f0200	0.59462	-13.4444	1.35842e-39	1233	875	0.208058	dystrle,maxdysrle
SF.f0855	0.593663	6.06743	2.87818e-09	216	211	0.207723	rp,rp_nbs
SF.f0829	0.59091	6.09249	2.3967e-09	235	215	0.206759	bathing,pf10
SF.f0796	0.586275	5.3451	1.58875e-07	300	70	0.205138	sf15
PBAHD.f0718	0.586159	-2.2035	0.0313454	32	31	0.205097	pbal7fr
SF.f0833	0.582271	6.11872	2.05275e-09	238	214	0.203737	physicdiff,rp04
SF.f0792	0.582133	4.95739	1.0913e-06	301	70	0.203688	sf11
SF.f0822	0.582091	6.07152	2.68727e-09	237	217	0.203674	lifting,pf03
SF.f0804	0.580026	4.50077	9.07541e-06	303	70	0.202951	sf23
Care.f0866	0.578638	-6.1853	1.3424e-09	303	172	0.202465	crgvr3
SF.f0832	0.570815	6.00084	4.04164e-09	236	216	0.199728	physiclimit,rp03
Motor.f0201	0.562521	-12.7192	9.22652e-36	1233	875	0.196826	dystlle,maxdyslle
SF.f0783	0.561077	4.11613	4.75655e-05	301	70	0.196321	sf2
SF.f0369	0.557091	7.09813	3.17677e-12	298	387	0.194926	pcs,pcsum
Cognitive.f0249	0.554147	-7.28925	7.95017e-13	331	418	0.193896	traila_time,trla1
SF.f0834	0.553252	5.7935	1.2951e-08	238	215	0.193583	emotioncut,re01
SF.f0823	0.552508	5.78975	1.32406e-08	236	216	0.193323	climbings,pf04
PBAHD.f0716	0.551722	-2.13548	0.0367453	32	31	0.193048	pbal6fr
PBAHD.f0717	0.550995	-2.09194	0.0406138	32	31	0.192793	pbal7sv
SF.f0830	0.543775	5.70441	2.1184e-08	238	214	0.190267	physiccut,rp01
SF.f0860	0.541278	5.50536	6.36971e-08	218	211	0.189393	re,re_nbs
PBAHD.f0752	0.540085	-2.08689	0.041084	32	31	0.188976	pbal24fr
SF.f0831	0.532726	5.61408	3.45823e-08	238	215	0.186401	physicacc,rp02
SF.f0826	0.527414	5.47502	7.29218e-08	235	216	0.184542	pf07,walkingm
Scl90r.f2481	0.522116	-2.80136	0.00605978	75	32	0.182688	tphobic_c
SF.f0835	0.51917	5.44546	8.50624e-08	238	215	0.181658	emotionacc,re02
SF.f0836	0.516191	5.42174	9.63699e-08	238	215	0.180615	emotioncare,re03
CareQoL.f0426	0.514768	2.36949	0.0195716	30	81	0.180117
SF.f0799	0.509131	3.86613	0.000130537	303	70	0.178145	sf18
SF.f0801	0.509006	3.93401	9.97208e-05	303	70	0.178101	sf20
SF.f0782	0.505329	3.76271	0.000195526	300	70	0.176815	sf1
Scl90r.f2478	0.501657	-2.49397	0.0142234	75	30	0.17553	tdepress_c
Behaviour.f0914	0.496811	-7.51918	1.23619e-13	664	325	0.173834	apathfr
SF.f0827	0.492159	5.13236	4.26108e-07	236	217	0.172206	pf08,walkings
PBAHD.f0754	0.490146	-1.87528	0.0655434	32	31	0.171502	pbal25fr
PBAHD.f0746	0.489668	-1.84703	0.0695942	32	31	0.171335	pbal21fr
SF.f0825	0.485324	5.08135	5.50802e-07	234	217	0.169815	bending,pf06
PBAHD.f0750	0.482829	-1.82428	0.0730081	32	31	0.168942	pbal23fr
Motor.f0194	0.482294	-10.9027	5.80143e-27	1232	874	0.168755	rigarmr,rigarmsright
rigidity.score	0.482277	-10.9019	5.84976e-27	1232	874	0.168749
SF.f0819	0.481272	-5.12822	4.34308e-07	237	218	0.168397	compared,ht
MMSE.f0291	0.466725	3.35028	0.000925645	79	186	0.163307	mmsetotal
SF.f0821	0.464154	4.87402	1.51619e-06	237	217	0.162408	activitiesm,pf02
PBAHD.f0740	0.463841	-1.74824	0.085454	32	31	0.162298	pbal18fr
PBAHD.f0737	0.463818	-1.81669	0.074179	32	31	0.16229	pbal17sv
Motor.f2448	0.461177	-2.73452	0.00704926	96	47	0.161366	rigidity
SF.f0828	0.460467	4.77565	2.42736e-06	236	216	0.161117	pf09,walkingo
SF.f0372	0.458277	3.30772	0.00106352	76	206	0.160351
Functional.f1273	0.457149	2.51248	0.0131312	99	42	0.159956	fcinfosource,tfcsrc,uhdrs75
SF.f0862	0.456638	4.37978	1.54033e-05	197	183	0.159778	sfscore
CareQoL.f0423	0.456586	2.23756	0.0272834	30	81	0.15976
SF.f0809	0.452972	3.47594	0.000569518	302	70	0.158495	sf28
Cognitive.f0252	0.450883	-5.92723	4.75223e-09	324	407	0.157764	trailb_time,trlb1
SF.f0815	0.449579	3.44311	0.000640867	302	70	0.157308	sf34
Cognitive.f0233	0.448507	6.9482	6.8163e-12	403	560	0.156933	verfct5
SF.f0803	0.4472	3.42454	0.000684652	303	70	0.156475	sf22
SF.f0805	0.446375	3.3987	0.000750758	303	69	0.156187	sf24
WPAI.f0600	0.442898	-2.69194	0.00782729	54	115	0.15497
WPAI.f0594	0.442898	-2.69194	0.00782729	54	115	0.15497	wpaiscr4
MMSE.f0301	0.43782	2.77515	0.00590741	82	187	0.153193
Summary.f0780	0.431393	-6.68538	3.54498e-11	772	410	0.150945	dxentire
PBAs.f0342	0.430158	-5.14786	3.49108e-07	252	403	0.150512	basapathfre,pbas6fr
Motor.f0195	0.427797	-9.67273	1.10448e-21	1233	874	0.149686	rigarml,rigarmsleft
HADS.f0384	0.425713	-5.59534	3.13468e-08	317	402	0.148957	depscore,hads_depscore
Cognitive.f0657	0.424012	2.87682	0.00450828	90	90	0.148362	hvltt11
SF.f0371	0.423745	-3.29397	0.00111488	76	206	0.148268
Behaviour.f0915	0.423317	-6.34835	3.31337e-10	664	325	0.148119	apathsv
Scl90r.f2482	0.409723	-2.0859	0.0393876	74	34	0.143362	tparanoid_c
PBAHD.f0753	0.397834	-1.54368	0.127839	32	31	0.139202	pbal25sv
CSRI.f0537	0.396083	4.873	1.50148e-06	206	270	0.13859	csri27
Care.f0868	0.393359	-4.22105	2.91876e-05	302	171	0.137636	crgvr5
Care.f0873	0.391404	-4.10999	4.66429e-05	303	172	0.136952	crgvr10
PBAHD.f0720	0.390873	-1.45596	0.150532	32	31	0.136766	pbal8fr
CareQoL.f0406	0.386067	1.70992	0.0901253	30	81	0.135085
Care.f0876	0.38404	-4.11558	4.56118e-05	301	171	0.134376	crgvr13
PBAHD.f0719	0.382588	-1.43345	0.156835	32	31	0.133867	pbal8sv
CareQoL.f0430	0.37953	1.7901	0.0762136	30	81	0.132797
Cognitive.f0256	0.373691	7.23156	7.50251e-13	896	642	0.130755	verflt05
SF.f0361	0.372608	4.89944	1.18927e-06	306	412	0.130376	pf,pf_nbs,pfsubscore
Motor.f0193	0.371636	-8.40576	7.71538e-17	1234	874	0.130035	luria
Physio.f0323	0.369063	-2.10905	0.0364052	63	109	0.129135	tug1
PBAs.f0344	0.363014	-4.12089	4.28961e-05	228	391	0.127019	baspersevfre,pbas7fr
SF.f0813	0.362959	2.79809	0.00541022	302	69	0.126999	sf32
PBAHD.f0749	0.361891	-1.40206	0.165967	32	31	0.126626	pbal23sv
Care.f0871	0.359209	-3.80853	0.000158207	303	172	0.125687	crgvr8
CSRI.f0561	0.358029	-4.56503	5.90457e-06	390	308	0.125274	csri39
CareQoL.f0419	0.353795	-1.53139	0.128571	30	81	0.123793
Functional.f1261	0.352065	2.41188	0.0170786	112	40	0.123188	bathe,uhdrs58
CareQoL.f0454	0.348892	1.86038	0.0655781	30	79	0.122077
Care.f0877	0.348733	-3.68253	0.000257753	301	171	0.122022	crgvr14
CareQoL.f0439	0.346292	-1.42931	0.155775	30	81	0.121168
PBAs.f0329	0.341751	-3.9204	9.84244e-05	224	388	0.119579	aptscore
SF.f0814	0.340279	2.67765	0.00774526	301	70	0.119064	sf33
CSRI.f0774	0.338512	2.40322	0.0172671	61	121	0.118445	csri59
PBAHD.f0739	0.337135	-1.30666	0.196233	32	31	0.117964	pbal18sv
MMSE.f0311	0.336148	2.44055	0.0153177	81	187	0.117618
SF.f0375	0.335922	2.53725	0.0117196	76	204	0.117539
CSRI.f0485	0.334614	-4.36137	1.48747e-05	390	310	0.117082	csri9
SF.f0811	0.334057	2.62141	0.00911896	302	69	0.116887	sf30
MMSE.f0310	0.331232	2.31221	0.0215273	82	187	0.115898
Behaviour.f0891	0.328723	-3.40056	0.000733263	220	226	0.11502	defscore
PBAHD.f0745	0.328157	-1.2766	0.206581	32	31	0.114822	pbal21sv
SF.f0374	0.323267	2.47503	0.0139146	76	206	0.113111
SF.f0849	0.323169	3.39113	0.000757736	238	212	0.113077	interferesocial,sf02
PBAs.f0341	0.322158	-3.95742	8.40698e-05	252	403	0.112723	basapath,pbas6sv
PBAs.f0343	0.321205	-3.75731	0.00018774	232	398	0.11239	baspersev,pbas7sv
SF.f0784	0.319033	2.54993	0.0111779	301	70	0.11163	sf3
Behaviour.f0888	0.318246	-4.65946	3.6229e-06	632	319	0.111354	behscore
Cognitive.f0659	0.317193	2.11079	0.0361868	90	90	0.110986	hvltt31
CareQoL.f0421	0.315391	1.48072	0.141565	30	81	0.110355
Behaviour.f0919	0.313648	-4.65243	3.73675e-06	647	322	0.109745	deprrfr
Behaviour.f0889	0.310741	-4.62419	4.25957e-06	665	325	0.108728	biscore
MMSE.f0307	0.305596	2.20989	0.0279644	81	187	0.106928
SF.f0857	0.302288	3.06869	0.002289	214	209	0.105771	gh,gh_nbs
PBAs.f0330	0.301306	-3.4082	0.00069722	223	386	0.105427	exfscore
Behaviour.f0917	0.300166	-4.62642	4.22621e-06	647	322	0.105028	dement
Care.f0869	0.29492	-3.12157	0.00190901	303	172	0.103193	crgvr6
Care.f0874	0.290826	-3.08383	0.00216306	303	172	0.10176	crgvr11
CSRI.f0547	0.290183	-3.71671	0.000217973	390	311	0.101535	csri32
Behaviour.f0907	0.288211	-4.35155	1.4926e-05	664	324	0.100845	obsesssv
Care.f0872	0.286567	-3.02171	0.00265008	302	172	0.10027	crgvr9
CareQoL.f0422	0.286012	-1.25198	0.213257	30	81	0.100075
PBAHD.f0755	0.279137	-1.01627	0.313515	32	31	0.09767	pbal26sv
PBAHD.f0756	0.279137	-1.01627	0.313515	32	31	0.09767	pbal26fr
Care.f0882	0.274967	-2.91097	0.0037754	297	172	0.0962108	crgvr19
Behaviour.f0906	0.273836	-4.12401	4.03709e-05	664	324	0.0958153	obsessfr
MHx.f0107	0.272016	2.82149	0.00498891	277	181	0.0951783	druguse,hxdrugab
CSRI.f0773	0.271928	-1.71414	0.0881959	61	124	0.0951475	csri58
CSRI.f0575	0.269201	-3.42572	0.000649133	391	308	0.0941936	csri46
Cognitive.f0667	0.267603	1.68811	0.0933375	82	80	0.0936341	mdrs2
PBAHD.f0724	0.266184	-1.03093	0.306642	32	31	0.093138	pbal10fr
PBAs.f0611	0.266111	-2.46168	0.0142466	123	282	0.0931122	basapathworst,pbas6wo
SF.f0362	0.265109	3.63151	0.000301532	312	418	0.0927617	rp,rp_nbs,rpsubscore
Scl90r.f2466	0.264895	-1.32746	0.186965	86	32	0.0926868	tdepress_p
MHx.f0104	0.263429	-1.16751	0.246608	40	39	0.0921739	cigperday,hxtobcpd,numbercigarettes
SF.f0859	0.261291	2.66469	0.00800057	217	208	0.0914259	sf,sf_nbs
HDCC.f0059	0.259558	-2.23928	0.0258421	194	120	0.0908195	dadagesx
CSRI.f0515	0.258115	-3.36673	0.000802293	391	310	0.0903144	csri19
HDCC.f0068	0.255643	-3.30319	0.0010044	432	272	0.0894494	apathy,ccapt
Behaviour.f0890	0.252762	-2.62164	0.00905131	220	226	0.0884415	behaviour_depscore
CSSRS.f0260	0.248899	-2.22237	0.026897	159	193	0.0870897	sid2
CSRI.f0483	0.247381	-2.09803	0.03673	122	183	0.0865587	csri8a
SF.f0842	0.245837	2.58123	0.0101604	236	216	0.0860182	dumps,mh02
Functional.f1260	0.245735	1.68345	0.0943678	112	40	0.0859829	dress,uhdrs57
Functional.f1268	0.245735	1.68345	0.0943678	112	40	0.0859829	bed,uhdrs65
Functional.f1265	0.245735	1.68345	0.0943678	112	40	0.0859829	uhdrs62,walkhelp
Care.f0887	0.243842	-2.57588	0.0103016	302	172	0.0853205	crgvr24
Functional.f0218	0.24142	5.37588	8.49569e-08	1198	838	0.0844727	carelevl,fccarelevel
PBAHD.f0705	0.24116	0.954099	0.343799	32	31	0.0843818	pbal1sv
SF.f0850	0.241126	2.52984	0.0117533	237	213	0.08437	gh02,sick
MMSE.f0308	0.240639	1.7543	0.0805302	81	187	0.0841995
Care.f0875	0.239415	-2.52923	0.011755	303	172	0.0837713	crgvr12
Functional.f1271	0.239056	1.29665	0.196885	100	42	0.0836459	fasrc,funcassfrom,uhdrs68
Enrollment.f0097	0.238415	1.22617	0.222082	64	86	0.0834214
MMSE.f0321	0.238169	1.69686	0.0908887	82	187	0.0833352
CareQoL.f0443	0.23646	1.1404	0.256617	30	81	0.0827375
SF.f0367	0.235444	3.16424	0.0016196	314	416	0.0823817	re,re_nbs,resubscore
PBAs.f0359	0.235205	-2.28185	0.0229908	156	272	0.0822982	bashousehold,pbahshd
PBAHD.f0734	0.234891	-0.909668	0.366578	32	31	0.0821883	pbal15fr
CSRI.f0512	0.233865	-2.15394	0.0317491	205	270	0.0818295	csri18
Enrollment.f0098	0.233648	2.45323	0.0145414	266	180	0.0817534
Behaviour.f0920	0.233587	-3.48559	0.0005131	647	322	0.0817322	irritrfr
CareQoL.f0441	0.231709	-1.05844	0.292194	30	81	0.0810751
PBAHD.f0732	0.230215	-0.89073	0.376574	32	31	0.0805523	pbal14fr
Scl90r.f2464	0.228826	-1.07921	0.283172	68	31	0.0800661	tobsess_p
Behaviour.f0899	0.228459	-3.40405	0.000690645	664	325	0.0799379	anxisv
Medical.f0140	0.228241	-1.81866	0.0699343	89	221	0.0798616	cafpd
PBAs.f0607	0.227605	-1.8904	0.0594196	123	283	0.0796391	bassuicworst,pbas2wo
Behaviour.f0908	0.226147	-3.4308	0.000626985	654	325	0.0791289	compulfr
SF.f0812	0.225634	1.6963	0.0906716	302	69	0.0789492	sf31
MHx.f0105	0.224271	-0.985101	0.327742	39	38	0.0784724	hxtobyos,smokyears
CareQoL.f0447	0.223265	-1.00715	0.316094	30	81	0.0781204
CSRI.f0775	0.223168	1.46494	0.144875	56	108	0.0780866	csri60__1
Behaviour.f0909	0.220915	-3.3343	0.000887275	654	325	0.077298	compulsv
CareQoL.f0446	0.218717	1.01551	0.312113	30	81	0.0765292
SF.f0786	0.215274	1.659	0.0979679	300	70	0.0753242	sf5
PBAs.f0333	0.214442	-2.42357	0.0156383	253	405	0.0750333	bassuic,pbas2sv
CSRI.f0563	0.213607	-2.73274	0.00644033	390	308	0.0747411	csri40
Physio.f0322	0.21169	1.20717	0.228979	64	115	0.0740704	tug
SF.f0808	0.211323	1.62348	0.105338	302	70	0.073942	sf27
Behaviour.f0898	0.21132	-3.15302	0.00166464	665	325	0.073941	anxifr
CSRI.f0506	0.211199	-2.74418	0.0062219	390	311	0.0738987	csri16
MMSE.f0315	0.210874	1.51009	0.132204	82	187	0.0737848
Care.f0884	0.210469	-2.24244	0.0253967	302	172	0.0736431	crgvr21
CareQoL.f0442	0.20784	-0.963156	0.337601	30	81	0.0727231
Summary.f0777	0.206684	-3.3629	0.000795933	776	410	0.0723189	visitprp
CareQoL.f0397	0.206532	0.923989	0.357552	30	80	0.0722656
CSRI.f0484	0.206001	1.97978	0.0486213	127	182	0.0720798	csri8b
SF.f0373	0.205321	1.50912	0.132403	76	204	0.0718417
updmed	0.203067	-2.54484	0.0111413	236	483	0.0710532
CSSRS.f0259	0.202701	-1.84051	0.0665393	159	193	0.0709251	sid1
HDCC.f0070	0.202549	-2.62008	0.00898134	432	271	0.0708719	ccpob,obsessive
CSRI.f0460	0.202163	1.92875	0.0547793	116	164	0.0707367	csri1b
CSRI.f0489	0.200332	-0.789387	0.432894	34	30	0.0700963	csri10a
Enrollment.f0093	0.199629	2.4485	0.0145762	547	195	0.0698501	rfstdy
CareQoL.f0403	0.199289	-0.893947	0.37332	30	81	0.0697312
Cognitive.f0663	0.198263	-1.29577	0.19677	88	88	0.0693722	hvlt4
MMSE.f0303	0.197918	1.15196	0.250367	82	187	0.0692515
Cognitive.f0664	0.196957	1.34851	0.179247	88	88	0.0689154	hvlt5
BDI.f2462	0.196766	-0.928597	0.355188	79	30	0.0688484	bdiscore,bditotal
MMSE.f0318	0.196648	1.2833	0.2005	82	187	0.0688071
Care.f0879	0.196306	-2.06786	0.0392025	299	171	0.0686875	crgvr16
PBAs.f0612	0.195481	-1.64698	0.100413	104	267	0.0683987	pbas7wo
SF.f0817	0.194458	1.49147	0.136694	301	70	0.0680409	sf36
CSRI.f0476	0.194421	1.22024	0.224381	53	92	0.0680279
Scl90r.f2480	0.193391	-0.933279	0.352797	76	32	0.0676677	thostility_c
CSRI.f0557	0.191926	-1.89189	0.0591194	205	268	0.0671548	csri37
CareQoL.f0427	0.191043	-0.945025	0.346736	30	81	0.066846
Scl90r.f2467	0.190314	-0.958115	0.339997	86	32	0.0665909	tanxiety_p
PBAHD.f0706	0.187648	0.736892	0.464013	32	31	0.0656582	pbal1fr
SF.f0807	0.187239	1.43197	0.153001	300	70	0.0655148	sf26
Enrollment.f0099	0.185471	1.03908	0.300461	64	86	0.0648962
Care.f0885	0.185452	-1.96506	0.0499949	302	171	0.0648897	crgvr22
HADS.f0383	0.184801	-2.38473	0.0173518	314	402	0.0646619	anxscore
CSRI.f0500	0.184383	-1.84283	0.0659798	205	270	0.0645155	csri14
HADS.f0387	0.183082	-2.32745	0.0202269	297	402	0.0640604	inwardirrscore,inwscore
Scl90r.f2471	0.18151	-0.934237	0.352073	87	34	0.0635102	tpsychoticism_p
SF.f0382	0.181391	1.35487	0.17655	76	206	0.0634689
SF.f0856	0.181028	1.86696	0.0625868	218	214	0.0633415	bp,bp_nbs
Scl90r.f2469	0.180855	-0.913162	0.363051	85	33	0.0632813	tphobic_p
PBAHD.f0744	0.179964	-0.702873	0.484809	32	31	0.0629695	pbal20fr
PBAs.f0357	0.179074	-2.0899	0.0370118	253	404	0.062658	basorientfre,pbas11fr
Care.f0881	0.179033	-1.8822	0.06043	299	170	0.0626436	crgvr18
CSRI.f0541	0.177212	2.3597	0.0185639	390	310	0.0620064	csri29
PBAs.f0346	0.176968	-2.10567	0.0356198	243	403	0.0619212	basobscompfre,pbas8fr
MMSE.f0305	0.176654	1.19312	0.233884	81	187	0.0618112
PBAHD.f0723	0.175187	-0.685297	0.495753	32	31	0.0612978	pbal10sv
PBAHD.f0747	0.173606	-0.683069	0.497149	32	31	0.0607448	pbal22sv
CSRI.f0458	0.172037	-2.26562	0.0237795	391	311	0.0601956	csri1
PBAs.f0336	0.171772	-2.08158	0.0377678	253	405	0.0601031	basanxfre,pbas3fr
CSRI.f0546	0.17115	1.34565	0.180002	83	111	0.0598853	csri31a
SF.f0365	0.170402	-2.34695	0.0191957	312	416	0.0596235	vt,vt_nbs,vtsubscore
PBAHD.f0748	0.166909	-0.652586	0.516475	32	31	0.0584015	pbal22fr
CSRI.f0524	0.165789	1.92799	0.0544547	205	270	0.0580094	csri22
CSRI.f0583	0.165364	-1.52676	0.127491	206	267	0.057861	csri50
SF.f0368	0.165088	-2.21218	0.0272662	309	416	0.0577642	mh,mh_nbs,mhsubscore
CSRI.f0559	0.165053	-1.52018	0.129137	205	268	0.0577521	csri38
PBAHD.f0733	0.164806	-0.645152	0.521248	32	31	0.0576656	pbal15sv
Cognitive.f0656	0.163799	-1.07108	0.285654	90	82	0.0573134	hvltd
Care.f0886	0.162392	-1.72932	0.0844048	302	172	0.056821	crgvr23
CSSRS.f0270	0.162217	-1.41658	0.1575	159	191	0.0567598	sbh1
CSRI.f0521	0.162033	-0.757881	0.449769	53	92	0.0566954	csri21
Cognitive.f0658	0.160356	1.07586	0.283445	90	90	0.0561087	hvltt21
Enrollment.f0647	0.1603	1.4688	0.142957	202	94	0.056089
PBAs.f0326	0.1599	-1.79562	0.0730481	224	390	0.0559489	depscore
Behaviour.f0916	0.1592	-2.4867	0.0130611	647	322	0.0557039	confus
SF.f0377	0.158825	1.16173	0.246348	76	202	0.0555729
PBAHD.f0711	0.158582	0.638696	0.525412	32	31	0.0554878	pbal4sv
PBAHD.f0712	0.158582	0.638696	0.525412	32	31	0.0554878	pbal4fr
Care.f0870	0.157682	-1.64765	0.100095	301	169	0.0551728	crgvr7
Cognitive.f0661	0.157393	1.07409	0.284238	90	90	0.0550717	hvlt2
PBAs.f0334	0.157301	-1.86961	0.0619835	253	405	0.0550396	bassuicfre,pbas2fr
SF.f0810	0.1557	1.21053	0.22685	303	69	0.0544795	sf29
Care.f0883	0.155333	-1.62754	0.104293	301	170	0.054351	crgvr20
CSRI.f0488	0.154302	1.71078	0.0877769	206	270	0.0539904	csri10
Enrollment.f0646	0.154018	1.27229	0.204276	202	94	0.0538909
CSRI.f0571	0.153887	-1.95578	0.0508908	390	308	0.0538451	csri44
PBAs.f0345	0.152857	-1.83415	0.0670926	243	403	0.0534847	basobscomp,pbas8sv
Cognitive.f0660	0.152671	1.01852	0.30982	89	90	0.0534197	hvlt1
Medical.f0136	0.151165	-1.65177	0.0991782	251	277	0.0528928	alcunits
HADS.f0385	0.149396	-1.91741	0.0555847	313	403	0.0522735	irrscore
MMSE.f0314	0.149016	-1.36876	0.172224	82	187	0.0521408
CareQoL.f0394	0.146635	-0.585202	0.559632	30	80	0.0513076
MHx.f0102	0.146294	1.52444	0.12809	277	182	0.0511883	alcoholabuse,hxalcab
PBAHD.f0725	0.145682	0.61233	0.542596	32	31	0.0509741	pbal11sv
HDCC.f0066	0.144599	-1.88389	0.0599897	432	278	0.0505952	ccvab,violent
CSRI.f0503	0.143432	1.65762	0.0980553	206	270	0.050187	csri15
Behaviour.f0895	0.142623	-2.12266	0.0340309	665	325	0.0499038	deprsv
CareQoL.f0409	0.142474	-0.665454	0.507166	30	81	0.0498517
SF.f0853	0.141545	-1.48812	0.137425	237	212	0.0495266	excellent,gh05
Scl90r.f2483	0.141475	-0.680717	0.497563	75	31	0.0495022	tpsychoticism_c
Behaviour.f0918	0.141291	-2.08962	0.0369125	647	322	0.0494378	deprexam
MMSE.f0306	0.138831	1.03672	0.300808	81	187	0.0485769
Functional.f1249	0.138416	0.879473	0.380298	129	56	0.0484317	fafinan,finances,finances_function,uhdrs46
SF.f0852	0.136512	1.44148	0.150148	236	213	0.0477657	gh04,worse
PBAHD.f0743	0.136443	-0.53452	0.594924	32	31	0.0477414	pbal20sv
CSRI.f0579	0.134764	-1.24424	0.214029	206	267	0.0471541	csri48
CSRI.f0587	0.134764	-1.24424	0.214029	206	267	0.0471541	csri52
PBAs.f0335	0.134736	-1.64442	0.100569	253	405	0.0471441	basanx,pbas3sv
CSRI.f0467	0.134011	-1.23426	0.217717	205	270	0.0468904	csri4
PBAs.f0339	0.131941	-1.60366	0.109271	253	405	0.0461661	basbeh,pbas5sv
CareQoL.f0431	0.131374	0.583652	0.560672	30	80	0.0459677
HDCC.f0062	0.131091	-1.69917	0.0897276	431	276	0.0458689	ccdep,depression
MMSE.f0316	0.130256	0.924319	0.356155	82	187	0.0455765
PBAs.f0355	0.129156	-1.32146	0.186809	253	404	0.0451918	bashallfre,pbas10fr
Medical.f0135	0.128812	2.16952	0.0302475	497	654	0.0450714	alcab
HDCC.f0075	0.128583	1.66041	0.0972788	430	273	0.0449914	cccog,dementia
PBAHD.f0760	0.127774	-0.497607	0.62058	32	30	0.0447082	pbal28fr
Care.f0880	0.127506	-1.31549	0.189003	298	163	0.0446142	crgvr17
PBAs.f0349	0.126529	-1.29458	0.19592	253	404	0.0442726	bashall,pbas10sv
Cognitive.f0666	0.126166	0.794283	0.428207	82	80	0.0441457	mdrs1
Care.f0878	0.126116	-1.32534	0.185697	303	172	0.044128	crgvr15
Physio.f0324	0.125837	0.742476	0.458783	64	115	0.0440305	scst
CareQoL.f0407	0.125007	0.552627	0.581651	30	81	0.0437399
Behaviour.f0894	0.124868	-1.86114	0.0630219	665	325	0.0436912	deprfr
PBAs.f0615	0.124345	-0.886706	0.375766	123	282	0.0435084	bashallworst,pbas10wo
PBAHD.f0709	0.124207	-0.468644	0.640995	32	31	0.0434599	pbal3sv
Cognitive.f0253	0.123824	1.48832	0.137186	240	368	0.0433261	trlb2
Enrollment.f0096	0.123662	1.28756	0.198569	266	180	0.0432693
SF.f0785	0.123578	0.961065	0.337147	302	70	0.04324	sf4
SF.f0851	0.123158	-1.30174	0.193673	237	213	0.0430929	gh03,healthy
SF.f0378	0.122766	-0.915421	0.360761	76	205	0.0429558
CareQoL.f0449	0.121978	0.627826	0.531431	30	81	0.0426802
PBAHD.f0759	0.121108	-0.473198	0.637789	32	30	0.0423756	pbal28sv
Cognitive.f0255	0.120547	1.97736	0.0482427	515	621	0.0421795	verflt
Medical.f0138	0.119217	-0.999033	0.318654	121	157	0.0417142	packy
CareQoL.f0436	0.116363	0.523338	0.601802	30	81	0.0407155
PBAs.f0356	0.1159	-1.41891	0.156402	253	404	0.0405534	basorient,pbas11sv
Physio.f0325	0.11568	0.771314	0.441579	63	111	0.0404763	scst1
HDCC.f0061	0.115645	-1.47142	0.141642	416	265	0.0404641	ccmtrage,motorage
SF.f0376	0.114644	0.844457	0.399137	76	205	0.0401139
CareQoL.f0450	0.114218	0.514157	0.608183	30	81	0.0399648
SF.f0787	0.113836	0.856034	0.392533	302	70	0.0398312	sf6
HDCC.f0057	0.113665	0.898291	0.36984	168	101	0.0397715	momagesx
MMSE.f0297	0.113652	0.6615	0.508862	82	187	0.0397668
CSSRS.f0272	0.112751	-0.914576	0.361049	159	190	0.0394516	sbh2
Cognitive.f0235	0.112631	1.75912	0.0788739	403	562	0.0394096	verfct7
MMSE.f0295	0.112547	-0.923484	0.356589	82	187	0.0393801
CSSRS.f0273	0.112456	-0.912173	0.362309	159	191	0.0393482	sbh3
Cognitive.f0222	0.1122	-1.85564	0.0638014	418	574	0.0392586	gen1
CSRI.f0776	0.109877	-0.541437	0.589245	40	78	0.0384461	csri60__2
Cognitive.f0242	0.108333	-1.62987	0.103453	410	564	0.0379058	swrt2
CareQoL.f0429	0.105006	0.502678	0.616205	30	81	0.0367416
HDCC.f0079	0.104858	-1.29013	0.197471	398	244	0.0366899	sxfam,symptomsfamily
CSRI.f0482	0.104711	-1.37881	0.168393	390	311	0.0366384	csri8
Behaviour.f0912	0.104559	-1.72168	0.0854415	664	325	0.0365851	hallucfr
PBAs.f0340	0.104315	-1.27453	0.202926	253	405	0.0364998	basbehfre,pbas5fr
SF.f0844	0.104231	1.12564	0.260901	242	223	0.0364704	energy,energy_sf36,vt02
MMSE.f0294	0.104181	0.731918	0.464861	82	187	0.0364529
MMSE.f0299	0.102371	-0.86575	0.387408	81	187	0.0358198
CareQoL.f0408	0.101939	0.486888	0.627315	30	81	0.0356684
SF.f0848	0.100933	1.06888	0.285698	236	214	0.0353164	tired,vt04
HDCC.f0081	0.100097	1.26208	0.207342	434	265	0.0350241	raterestimate,sxest
HDCC.f0078	0.0994054	-1.23578	0.21699	398	252	0.0347819	sxsubj,symptomssubject
CareQoL.f0410	0.0982293	-0.480361	0.631933	30	81	0.0343704
CSRI.f0464	0.0958472	-1.25492	0.209927	390	310	0.0335369	csri3
SF.f0845	0.0953885	1.00603	0.314944	238	213	0.0333764	downheart,mh04
SF.f0843	0.0953863	1.01272	0.311735	238	216	0.0333757	calm,mh03
Cognitive.f1214	0.0952075	0.435937	0.663777	77	30	0.0333131	smell_pct,upsitresponses
CSRI.f0569	0.0949359	-0.874382	0.382356	205	268	0.0332181	csri43
PBAs.f0613	0.094728	-0.867397	0.386239	123	283	0.0331453	basobscompworst,pbas8wo
CSSRS.f0278	0.0936162	-0.82375	0.410646	159	191	0.0327563	sbh6
PBAs.f0327	0.092207	-1.0824	0.279502	224	390	0.0322632	irascore
CareQoL.f0412	0.09136	0.403156	0.687623	30	81	0.0319669
SF.f0841	0.0899476	0.948931	0.343163	238	216	0.0314727	mh01,nervous
CSRI.f0565	0.0885569	-1.12549	0.260771	390	308	0.0309861	csri41
Cognitive.f0231	0.0882483	-1.43171	0.152542	418	574	0.0308781	verfct
Cognitive.f0665	0.0881932	0.788356	0.431076	155	165	0.0308588	mdrs
CSRI.f0555	0.0881288	-1.12003	0.263084	390	311	0.0308363	csri36
PBAs.f0348	0.0878585	-1.04078	0.298361	253	403	0.0307417	basdelfre,pbas9fr
HDCC.f0060	0.0876405	-1.10556	0.269306	424	266	0.0306654	ccmtr,motor
Enrollment.f0101	0.0865852	-0.894539	0.371518	266	180	0.0302962
CSRI.f0545	0.0864056	-1.13653	0.256126	391	311	0.0302333	csri31
CSRI.f0553	0.085593	-1.10868	0.267949	389	309	0.029949	csri35
PBAHD.f0708	0.0852408	0.336974	0.737293	32	31	0.0298258	pbal2fr
HDCC.f0063	0.0839889	-0.855749	0.392618	251	177	0.0293877	ccdepage,depressage
CareQoL.f0445	0.0832937	0.407218	0.684646	30	81	0.0291445
CSRI.f0577	0.0816589	-1.06059	0.289243	391	307	0.0285724	csri47
MMSE.f0296	0.0816091	0.599536	0.549324	82	187	0.028555
Medical.f0139	0.0813791	-0.732256	0.464475	110	263	0.0284746	cafab
PBAHD.f0714	0.0810308	-0.320649	0.749572	32	31	0.0283527	pbal5fr
SF.f0846	0.0806791	0.853545	0.393811	237	215	0.0282296	vt03,wornout
PBAs.f0614	0.0802098	0.818138	0.413763	123	281	0.0280654	basdelworst,pbas9wo
Cognitive.f0234	0.0800516	1.30062	0.193701	403	562	0.0280101	verfct6
MHx.f0103	0.0796043	0.849775	0.395876	292	188	0.0278536	hxtobab,smoking,smoking_hx
MMSE.f0320	0.079472	-0.62894	0.529928	82	186	0.0278073
CareQoL.f0428	0.0790535	-0.367329	0.714086	30	81	0.0276608
PBAHD.f0731	0.0789937	0.326973	0.744808	32	31	0.0276399	pbal14sv
CareQoL.f0451	0.0784482	-0.386283	0.70004	30	81	0.027449
CSRI.f0585	0.0782011	-0.80419	0.421693	206	267	0.0273626	csri51
Cognitive.f0243	0.0773786	-1.17579	0.239966	410	564	0.0270748	swrt3
HDCC.f0082	0.0761966	-0.962754	0.336017	415	259	0.0266612	sxrater
CSRI.f0518	0.0760054	-0.79578	0.426559	206	269	0.0265943	csri20
Behaviour.f0900	0.0758004	-1.13738	0.255655	664	325	0.0265226	suicfr
CSRI.f0543	0.0757477	-0.987449	0.323765	390	310	0.0265041	csri30
CSSRS.f0275	0.0750418	0.735735	0.462389	159	190	0.0262571	sbh4
SF.f0818	0.0744334	-0.80552	0.420932	241	225	0.0260443	general,general_sf36,gh01
Enrollment.f0648	0.0744031	0.578714	0.563254	191	87	0.0260336
HDCC.f0064	0.0742025	-0.965075	0.334836	434	277	0.0259635	ccirb,irritability
SF.f0861	0.0738481	0.745298	0.456511	213	207	0.0258395	mh,mh_nbs
PBAs.f0331	0.0736739	0.914599	0.360738	253	405	0.0257785	basdepr,pbas1sv
MMSE.f0292	0.0730169	0.512358	0.608824	82	187	0.0255486
Cognitive.f0655	0.0708237	0.632588	0.527457	155	165	0.0247812	hvlt
Behaviour.f0921	0.0701965	-1.03618	0.300373	664	325	0.0245618	isobt
CSRI.f0494	0.0681828	0.762024	0.446425	206	270	0.0238572	csri12
SF.f0839	0.0665842	0.717132	0.473662	238	217	0.0232978	bp02,interferework
CSRI.f0473	0.0661485	0.891425	0.373008	390	310	0.0231454	csri6
CSRI.f0589	0.0660639	0.885959	0.375945	391	307	0.0231158	csri53
PBAs.f0328	0.0653918	-0.751093	0.452887	224	388	0.0228806	psyscore
SF.f0858	0.0650907	0.666717	0.505317	216	208	0.0227752	vt,vt_nbs
Cognitive.f0232	0.0650729	1.18115	0.237835	403	562	0.022769	verfctd
HDCC.f0085	0.0648692	-0.801439	0.423174	401	244	0.0226977	majorsymptomfamily,sxfamm
SF.f0847	0.0644179	0.681404	0.495968	235	215	0.0225398	happy,mh05
CSRI.f0509	0.0640414	-0.675436	0.499728	206	270	0.0224081	csri17
CareQoL.f0420	0.063144	-0.292432	0.770513	30	81	0.0220941
PBAHD.f0713	0.062782	-0.251905	0.801961	32	31	0.0219674	pbal5sv
PBAHD.f0726	0.0625789	0.255346	0.799315	32	31	0.0218964	pbal11fr
Cognitive.f0662	0.0622923	0.419612	0.675275	90	90	0.0217961	hvlt3
HDCC.f0080	0.0616182	-0.787277	0.43139	432	261	0.0215602	hddiagn,hddiagnosed
CareQoL.f0455	0.0610521	0.285659	0.775697	30	78	0.0213621
SF.f0840	0.0576553	0.615343	0.538639	238	215	0.0201736	life,vt01
Cognitive.f0246	0.0572058	-0.860395	0.38979	396	547	0.0200163	sit2
PBAs.f0347	0.0570008	-0.693314	0.488359	253	403	0.0199446	basdel,pbas9sv
Cognitive.f0669	0.0566587	0.356821	0.721696	82	80	0.0198249	mdrs4
CSRI.f0490	0.0562293	-0.212611	0.832339	33	30	0.0196746	csri10b
Behaviour.f0913	0.0534814	-0.808062	0.419249	664	325	0.0187131	hallucsv
CareQoL.f0452	0.0533595	-0.257797	0.79705	30	81	0.0186705
Cognitive.f0254	0.0531669	-0.673031	0.501171	265	376	0.0186031	trialb_error,trlb3
CareQoL.f0424	0.053124	-0.238978	0.811572	30	81	0.0185881
Cognitive.f0230	0.0526915	-0.79517	0.426708	412	567	0.0184368	sdmt2
MMSE.f0309	0.0523153	0.391792	0.695525	81	187	0.0183051
CareQoL.f0411	0.0519756	0.2466	0.805682	30	81	0.0181863
CareQoL.f0393	0.0512332	0.236543	0.813456	30	81	0.0179265
PBAs.f0338	0.0489051	-0.606788	0.544202	253	405	0.0171119	basirritfre,pbas4fr
Cognitive.f0248	0.0484868	-0.700871	0.483578	363	476	0.0169655	trl
PBAHD.f0707	0.0478951	0.189331	0.850462	32	31	0.0167585	pbal2sv
CareQoL.f0432	0.0477828	0.210609	0.833585	30	81	0.0167192
CSSRS.f0277	0.0473109	-0.425906	0.67044	159	190	0.0165541	sbh5
SF.f0380	0.0468669	0.353422	0.724039	76	205	0.0163987
MMSE.f0317	0.0467953	0.340831	0.733499	82	187	0.0163737
PBAs.f0358	0.0455913	0.577674	0.563681	255	408	0.0159524	basrelative,pbainfo
PBAs.f0609	0.0447004	0.41288	0.679914	123	283	0.0156407	basirritworst,pbas4wo
CareQoL.f0434	0.0425105	-0.202185	0.840149	30	81	0.0148744
Behaviour.f0901	0.0424268	-0.629062	0.529454	664	325	0.0148451	suicsv
SF.f0370	0.0411695	0.525448	0.599442	298	387	0.0144052	mcs,mcsum
HADS.f0386	0.040893	-0.516547	0.605638	293	400	0.0143085	outscore,outwardirrscore
PBAs.f0606	0.0388717	0.354245	0.72334	123	283	0.0136012	basdeprworst,pbas1wo
HDCC.f0069	0.038704	0.35096	0.725843	182	149	0.0135425	apathyage,ccaptage
Behaviour.f0896	0.038051	-0.555111	0.578949	634	319	0.013314	guiltfr
CareQoL.f0444	0.0364508	0.17415	0.86207	30	81	0.0127541
MMSE.f0300	0.0352379	-0.270953	0.786637	82	187	0.0123297
PBAs.f0608	0.0352358	0.323513	0.746474	123	283	0.012329	basanxworst,pbas3wo
Behaviour.f0897	0.0352063	-0.514326	0.607143	634	319	0.0123187	guiltsv
HDCC.f0071	0.0347714	-0.250776	0.802233	116	96	0.0121665	ccpobage,obsessage
HDCC.f0076	0.0344421	0.275514	0.783127	182	97	0.0120513	cccogage,dementage
PBAs.f0337	0.034329	-0.425594	0.670543	253	405	0.0120117	basirrit,pbas4sv
SF.f0381	0.0336862	0.243775	0.807584	76	206	0.0117868
CSRI.f0497	0.0332379	-0.348038	0.727966	206	270	0.0116299	csri13
Scl90r.f2470	0.032851	-0.172453	0.863356	89	40	0.0114946	tparanoid_p
HDCC.f0058	0.0328217	-0.420713	0.674095	435	264	0.0114843	dadhd
Behaviour.f0905	0.0325206	-0.48138	0.630354	658	325	0.011379	irritsv
HDCC.f0083	0.0324592	0.381838	0.702727	312	248	0.0113575	sxestcfd
CSRI.f0536	0.0323006	-0.423126	0.672334	389	309	0.011302	csri26
Cognitive.f0257	0.0321653	0.485658	0.627325	398	528	0.0112546	verflt06
CareQoL.f0415	0.032105	0.151249	0.880059	30	81	0.0112335
PBAHD.f0727	0.03126	0.122997	0.902514	32	31	0.0109379	pbal12sv
SF.f0838	0.0310876	0.333515	0.7389	238	217	0.0108776	bodypain,bp01
SF.f0363	0.0305232	-0.426883	0.66959	314	422	0.0106801	bp,bp_nbs,bpsubscore
CSRI.f0527	0.0302568	0.333812	0.738669	206	270	0.0105869	csri23
Behaviour.f0904	0.0295764	-0.439775	0.660197	659	325	0.0103488	irritfr
SF.f0816	0.0287661	0.220737	0.82542	300	70	0.0100653	sf35
MMSE.f0312	0.0284796	0.214776	0.830106	82	187	0.00996501
Cognitive.f0668	0.0283208	-0.181044	0.856562	82	80	0.00990945	mdrs3
Medical.f0141	0.0277044	0.476567	0.633761	500	657	0.00969378	drugab
PBAs.f0616	0.0271184	0.260504	0.794608	123	282	0.00948872	basorientworst,pbas11wo
Enrollment.f0095	0.0270982	0.280979	0.778857	266	180	0.00948168	fhx
CareQoL.f0433	0.0270548	0.123634	0.901833	30	81	0.00946649
SF.f0837	0.026127	0.27925	0.780181	237	215	0.00914184	extent,sf01
Cognitive.f0228	0.0258763	0.4286	0.668296	518	621	0.00905412	digit,sdmt
SF.f0366	0.0256964	-0.353453	0.723851	313	417	0.00899117	sf,sf_nbs,sfsubscore
Behaviour.f0910	0.025132	-0.375971	0.70702	664	325	0.0087937	delusfr
PBAHD.f0729	0.0249579	0.100576	0.920217	32	31	0.00873277	pbal13sv
Cognitive.f0236	0.0248781	-0.422523	0.672724	515	621	0.00870484	scnt
CSRI.f0530	0.024649	0.271967	0.785766	206	270	0.0086247	csri24
CSRI.f0573	0.0244938	0.269373	0.787761	205	268	0.00857038	csri45
Enrollment.f0100	0.0241226	-0.146679	0.883585	64	86	0.00844049
Behaviour.f0903	0.0218464	-0.323857	0.746115	661	324	0.00764406	aggrsv
CareQoL.f0438	0.0214718	0.100655	0.920009	30	81	0.00751298
HDCC.f0067	0.0208857	0.142034	0.887208	103	84	0.00730792	ccvabage,violentage
CareQoL.f0453	0.0201728	0.0983009	0.921874	30	81	0.00705846
Cognitive.f0240	0.0184233	0.313319	0.754093	547	636	0.00644633	stroop,swrt
CareQoL.f0437	0.0178148	0.0906239	0.927958	30	81	0.00623341
Scl90r.f2468	0.0177529	-0.0926476	0.926334	89	36	0.00621173	thostility_p
Cognitive.f0239	0.0174421	0.270006	0.787213	410	566	0.00610301	scnt3
CSRI.f0533	0.0173905	0.191896	0.847906	206	270	0.00608493	csri25
Cognitive.f0250	0.0169995	-0.207084	0.836013	243	374	0.00594813	trla2
SF.f0364	0.0169444	0.229575	0.818487	310	418	0.00592886	gh,gh_nbs,ghsubscore
CSRI.f0461	0.0167101	0.2194	0.826403	389	309	0.00584688	csri2
CareQoL.f0448	0.0160242	0.0745605	0.940701	30	81	0.00560688
PBAs.f0610	0.0156067	-0.13999	0.888738	123	283	0.00546077	basbehworst,pbas5wo
Cognitive.f0247	0.0150687	-0.230896	0.817446	396	547	0.00527255	sit3
Medical.f0137	0.0148379	0.250268	0.802425	500	656	0.00519179	tobab
HDCC.f0056	0.0147857	0.189758	0.849554	438	264	0.00517352	momhd
PBAHD.f0730	0.0147596	-0.0590163	0.953132	32	31	0.0051644	pbal13fr
Cognitive.f0251	0.0140048	0.198281	0.842887	268	382	0.00490027	triala_error,trla3
MMSE.f0319	0.0139565	-0.107439	0.914521	82	187	0.00488336
Functional.f2452	0.0138775	0.0689681	0.945124	94	35	0.00485573	uhdrs76
MMSE.f0298	0.0131599	0.0987887	0.92138	82	187	0.00460464
MMSE.f0293	0.0131599	0.0987887	0.92138	82	187	0.00460464
CSRI.f0470	0.0101598	0.133627	0.893736	390	310	0.00355492	csri5
HDCC.f0086	0.0100648	0.129399	0.897079	438	265	0.00352168	majorsymptomrater,sxraterm
CSRI.f0539	0.00956299	0.125802	0.899925	391	310	0.00334609	csri28
HDCC.f0065	0.00932471	-0.0928636	0.926057	252	163	0.00326272	ccirbage,irritage
Behaviour.f0902	0.00897519	0.132528	0.894593	662	324	0.00314042	aggrfr
Cognitive.f0238	0.00826541	0.125998	0.89976	410	566	0.00289207	scnt2
SF.f0379	0.00806167	0.0619131	0.950676	76	206	0.00282078
PBAs.f0332	0.00768141	0.0943396	0.924868	253	405	0.00268773	basdeprfre,pbas1fr
Behaviour.f0893	0.00750994	-0.0800398	0.936242	220	226	0.00262773	behaviour_psyscore
Enrollment.f0645	0.00730855	-0.0587584	0.953184	202	94	0.00255726
HDCC.f0077	0.00686727	0.0607754	0.951571	111	263	0.00240286	hxsid
PBAHD.f0766	0.00640544	-0.0260668	0.979289	32	31	0.00224126	pbal31fr
PBAHD.f0765	0.00640544	-0.0260668	0.979289	32	31	0.00224126	pbal31sv
Behaviour.f0892	0.00623402	-0.0655756	0.947745	220	226	0.00218128	behaviour_irascore
SF.f0806	0.00613404	0.0469	0.962618	302	69	0.0021463	sf25
PBAHD.f0710	0.00566477	-0.0224508	0.982162	32	31	0.0019821	pbal3fr
MHx.f0106	0.00562428	-0.0378614	0.969839	106	79	0.00196794	hxpacky
Behaviour.f0911	0.00547685	0.0793725	0.936752	664	325	0.00191635	delussv
CSRI.f0459	0.00508741	-0.043837	0.965065	119	166	0.00178009	csri1a
CSRI.f0491	0.00447577	-0.0482794	0.961514	205	270	0.00156607	csri11
Cognitive.f0258	0.00443735	0.0664662	0.947021	398	528	0.00155263	verflt07
CareQoL.f0418	0.00421581	0.0197224	0.984301	30	81	0.00147511
CSRI.f0479	0.0040429	0.0530968	0.95767	390	309	0.00141461	csri7
HDCC.f0072	0.00373307	-0.0486274	0.96123	435	278	0.0013062	ccpsy,psychosis
PBAHD.f0728	0.00258724	0.0101405	0.991942	32	31	0.000905276	pbal12fr
Cognitive.f0670	0.00172513	0.0107496	0.991437	82	80	0.000603623	mdrs5
Cognitive.f0244	0.000459255	0.00770489	0.993854	515	621	0.000160693	sit
HDCC.f0084	0.000212753	-0.00265852	0.99788	406	253	7.44424e-05	majorsymptomsubject,sxsubjm
